# Supplementary material
Source: Preprints.org preprint supplement (doi:10.20944/preprints202005.0027.v2)
Supplement: Supplementary file 1 [file supplementary]

## Sheet: US-likely
2020-05-01	2020-05-01	2029-10-01	2020-07-01	2020-08-15	2020-11-01	2021-04-01	scale all unlocks by	0-main region, 1-subregion, 2-without sub	Use Daily Partial Unlock->1	UNLOCK ALL->1	Initial & Unlocked R0	Total / Known case ratio	Mortality as % of vent cases enter at right	FINAL CASES	Econ Cost % 18-month lock down	Total Est. Deaths	Use proportional vent. alloc.	Initial Known Cases on Vent.	Spreading Window (Days)	Case Duration	Vents per capita	Vents avail for current region	Vents main region	Vents subregion (if not auto alloc)	Pre-Peak Vent. Util. Target	MWFSa or late Vent. Util. Target	TTSu Vent. Util. Target	Population	Population main region	Population subregion (e.g. NY St.)	Name of main region	Name of sub-region	Ventil mfg rate/day	Change per day in crit cases on vent (.01%=half in 1 yr.) 180 days only	region mortality % of vent cases	sub-region mortality % of vent cases	region w/o sub-region mortality % vent cases	population growth rate		ENDEMIC CREATED 04/22/22
0	0.1	RE- LOCK	0.2	0.3	0.7	1	1	0	0	0	2.5	12	1.05	0.605339	0.428281	507808	0	0.05	6	14	0.000325758	100000	100000	7500	0.4	0.4	0.4	330000000	330000000	20000000	US	NY	300	0.0002	1.05	1.5	0.88	0.006		2022-04-22
Date	Predicted Known cases	US known cases	US known cases	NY known cases	Target Vent. Util.	Known Spreading Cases 70%	Known Active Cases	Total Cum. Cases	US Known New Cases	US COVID-19 Replication Rate (R0)	Unlock this day of the week on:	Lock-down ON/OFF	5.5	US cases - ENDEMIC CREATED 04/22/22	historical known cases	UNLOCK %: R0=2.5, Deaths=0.51M, Cost=42.8%	ventilator utilization, 100000+300/day, improve 0.02%/day	predicted active cases, fixed unlock, case ratio=12	predicted active cases as of 3/21	predicted active cases as of 3/21	herd immunity ihreshold 60%	potential unlock effectiveness	suscepti-bility	last actual R0	current # ventils	current % known cases on vent	last 2-day avg R0	last locked R0	susceptibility change rate	Rt	US pred	NY pred	US excl NY pred	predicted from date	Est. Deaths	cases end date	date		population	date of non-decreasing susceptibility
2020-03-21	24000	24000	24000	10356	0	24000	24000	288000	3528.4	2.5	2021-01-01	0	2020-03-21	0.000872727	0.000872727	0.1	0.012	0.000872727	0.00423529	0.00423529	0.6	0.1	0.999127	2.5	100000	0.05	2.5	2.5	1	2.49782	0.00423529	0.0062136	0.00426375	2020-05-04	185.241	00:00:00		delta-cases	330000000	2022-04-22
2020-03-22	32821	32821	32821	15168	0	32821	32821	393852	8821	2.35262	2021-01-01	1	2020-03-22	0.00119347	0.00119347	0	0.0163449	0.00119347	0.00599253	0.00599253	0.574943	0	0.998807	2.35262	100000	0.0498	2.42631	2.35262	0.999679	2.34982	0.00599253	0.00878651	0.00603274	2020-05-04	646.491	00:00:00	2020-03-22	8821	3.30005e+08	2022-04-22
2020-03-23	43600	43600	43600	20875	0	43600	43600	523200	10779	2.16157	2021-01-01	1	2020-03-23	0.0015854	0.0015854	0	0.0216259	0.0015854	0.00847445	0.00847445	0.537372	0	0.998415	2.16157	100000	0.0496008	2.2571	2.16157	0.999608	2.15814	0.00847445	0.0124154	0.00853121	2020-05-04	1207.87	00:00:00	2020-03-23	10779	3.30011e+08	2022-04-22
2020-03-24	53870	53870	53870	25665	0	53870	53870	646440	10270	2.10687	2021-01-01	1	2020-03-24	0.00195881	0.00195881	0	0.0266131	0.00195881	0.0119755	0.0119755	0.525363	0	0.998041	2.10687	100000	0.0494024	2.13422	2.10687	0.999626	2.10275	0.0119755	0.0175242	0.0120556	2020-05-04	1740.6	00:00:00	2020-03-24	10270	3.30016e+08	2022-04-22
2020-03-25	67857	67857	67857	30811	0	67857	67857	814284	13987	2.04473	2021-01-01	1	2020-03-25	0.00246737	0.00246737	0	0.0333889	0.00246737	0.0169056	0.0169056	0.510938	0	0.997533	2.04473	100000	0.0492048	2.0758	2.04473	0.99949	2.03969	0.0169056	0.0246981	0.0170182	2020-05-04	2463.24	00:00:00	2020-03-25	13987	3.30022e+08	2022-04-22
2020-03-26	84773	84773	84773	37258	0	84773	84773	1017276	16916	1.95223	2021-01-01	1	2020-03-26	0.0030824	0.0030824	0	0.0415455	0.0030824	0.0238305	0.0238305	0.487764	0	0.996918	1.95223	100000	0.049008	1.99848	1.95223	0.999383	1.94621	0.0238305	0.0347348	0.0239884	2020-05-04	3333.71	00:00:00	2020-03-26	16916	3.30027e+08	2022-04-22
2020-03-27	102738	102738	102738	44635	0	78738	102738	1232856	17965	1.84384	2021-01-01	1	2020-03-27	0.00373556	0.00373556	0	0.0384335	0.00373556	0.0335233	0.0335233	0.457652	0	0.996264	1.84384	100000	0.0488119	1.89803	1.84384	0.999345	1.83695	0.0335233	0.0487049	0.0337438	2020-05-04	4254.46	00:00:00	2020-03-27	17965	3.30033e+08	2022-04-22
2020-03-28	122070	122070	122070	52318	0	89249	122070	1464840	19332	1.82848		1	2020-03-28	0.0044384	0.0044384	0	0.0433899	0.0044384	0.04674	0.04674	0.453099	0	0.995562	1.82848	100000	0.0486167	1.83616	1.82848	0.999295	1.82037	0.04674	0.0676022	0.0470444	2020-05-04	5241.31	00:00:00	2020-03-28	19332	3.30038e+08	2022-04-22
2020-03-29	140321	140321	140321	59513	0	96721	140321	1683852	18251	1.71288		1	2020-03-29	0.00510191	0.00510191	0	0.0468345	0.00510191	0.0643276	0.0643276	0.416188	0	0.994898	1.71288	100000	0.0484222	1.77068	1.71288	0.999334	1.70414	0.0643276	0.0924662	0.0647407	2020-05-04	6169.25	00:00:00	2020-03-29	18251	3.30043e+08	2022-04-22
2020-03-30	162417	162417	162417	66497	0	108547	162417	1949004	22096	1.68898		1	2020-03-30	0.0059052	0.0059052	0	0.0523506	0.0059052	0.0874799	0.0874799	0.407925	0	0.994095	1.68898	100000	0.0482285	1.70093	1.68898	0.999193	1.679	0.0874799	0.124697	0.0880308	2020-05-04	7288.19	00:00:00	2020-03-30	22096	3.30049e+08	2022-04-22
2020-03-31	187500	187500	187500	75795	0	119643	187500	2250000	25083	1.6542		1	2020-03-31	0.00681706	0.00681706	0	0.0574713	0.00681706	0.117531	0.117531	0.39548	0	0.993183	1.6542	100000	0.0480356	1.67159	1.6542	0.999083	1.64293	0.117531	0.165675	0.118252	2020-05-04	8553.32	00:00:00	2020-03-31	25083	3.30054e+08	2022-04-22
2020-04-01	214465	214465	214465	83712	0	129692	214465	2573580	26965	1.60208		1	2020-04-01	0.00779732	0.00779732	0	0.0620492	0.00779732	0.155829	0.155829	0.375813	0	0.992203	1.60208	100000	0.0478435	1.62814	1.60208	0.999013	1.58959	0.155829	0.216486	0.156751	2020-05-04	9907.92	00:00:00	2020-04-01	26965	3.3006e+08	2022-04-22
2020-04-02	244000	244000	244000	92381	0	141262	244000	2928000	29535	1.57791		1	2020-04-02	0.00887098	0.00887098	0	0.0673143	0.00887098	0.203501	0.203501	0.366252	0	0.991129	1.57791	100000	0.0476521	1.59	1.57791	0.998918	1.56392	0.203501	0.277513	0.204647	2020-05-04	11385.7	00:00:00	2020-04-02	29535	3.30065e+08	2022-04-22
2020-04-03	276000	276000	276000	102863	0	153930	276000	3312000	32000	1.54834		1	2020-04-03	0.0100342	0.0100342	0	0.0730575	0.0100342	0.261084	0.261084	0.354149	0	0.989966	1.54834	100000	0.0474615	1.56313	1.54834	0.998826	1.53281	0.261084	0.347953	0.262462	2020-05-04	12980.4	00:00:00	2020-04-03	32000	3.30071e+08	2022-04-22
2020-04-04	310500	310500	310500	113704	0	170179	286500	3726000	34500	1.51828		1	2020-04-04	0.0112883	0.0112883	0	0.0804464	0.0104158	0.311259	0.311259	0.341359	0	0.988712	1.51828	100000	0.0472716	1.53331	1.51828	0.998733	1.50114	0.311259	0.400831	0.312737	2020-05-04	14692.8	00:00:00	2020-04-04	34500	3.30076e+08	2022-04-22
2020-04-05	336327	336327	336327	123018	0	173910	303506	4035924	25827	1.38878		1	2020-04-05	0.0122271	0.0122271	0	0.0818813	0.0110339	0.379179	0.379179	0.279943	0	0.987773	1.38878	100000	0.0470826	1.45353	1.38878	0.999051	1.3718	0.379179	0.471759	0.38077	2020-05-04	15969.6	00:00:00	2020-04-05	25827	3.30081e+08	2022-04-22
2020-04-06	364028	364028	364028	130689	0	176528	320428	4368336	27701	1.35278		1	2020-04-06	0.0132339	0.0132339	0	0.0827814	0.0116489	0.448852	0.448852	0.260779	0	0.986766	1.35278	100000	0.0468942	1.37078	1.35278	0.998981	1.33487	0.448852	0.537363	0.45045	2020-05-04	17333.6	00:00:00	2020-04-06	27701	3.30087e+08	2022-04-22
2020-04-07	395000	395000	395000	139000	0	180535	341130	4740000	30972	1.32813		1	2020-04-07	0.0143596	0.0143596	0	0.0843219	0.0124013	0.515085	0.515085	0.247064	0	0.98564	1.32813	100000	0.0467067	1.34045	1.32813	0.998859	1.30906	0.515085	0.591865	0.516562	2020-05-04	18852.5	00:00:00	2020-04-07	30972	3.30092e+08	2022-04-22
2020-04-08	426659	426659	426659	149316	0	182659	358802	5119908	31659	1.28047		1	2020-04-08	0.0155103	0.0155103	0	0.0849727	0.0130435	0.572266	0.572266	0.219034	0	0.98449	1.28047	100000	0.0465198	1.3043	1.28047	0.998833	1.26061	0.572266	0.630591	0.573491	2020-05-04	20398.9	00:00:00	2020-04-08	31659	3.30098e+08	2022-04-22
2020-04-09	466546	466546	466546	161504	0	190546	381773	5598552	39887	1.3179		1	2020-04-09	0.01696	0.01696	0	0.0882871	0.0138783	0.615228	0.615228	0.241215	0	0.98304	1.3179	100000	0.0463337	1.29918	1.3179	0.998527	1.29555	0.615228	0.650371	0.616094	2020-05-04	22339.4	00:00:00	2020-04-09	39887	3.30103e+08	2022-04-22
2020-04-10	502000	502000	502000	173258	0	191500	399262	6024000	35454	1.26072		1	2020-04-10	0.0182485	0.0182485	0	0.0883742	0.0145138	0.640319	0.640319	0.206804	0	0.981751	1.26072	100000	0.0461484	1.28931	1.26072	0.998689	1.23772	0.640319	0.649909	0.64076	2020-05-04	24057.4	00:00:00	2020-04-10	35454	3.30109e+08	2022-04-22
2020-04-11	531257	531257	531257	180458	0	194930	409187	6375084	29257	1.19394		1	2020-04-11	0.0193118	0.0193118	0	0.0895973	0.0148744	0.64573	0.64573	0.162436	0	0.980688	1.19394	100000	0.0459638	1.22733	1.19394	0.998917	1.17088	0.64573	0.629468	0.645721	2020-05-04	25469.4	00:00:00	2020-04-11	29257	3.30114e+08	2022-04-22
2020-04-12	560402	560402	560402	189415	0	196374	420081	6724824	29145	1.16741		1	2020-04-12	0.0203709	0.0203709	0	0.0898999	0.0152701	0.631305	0.631305	0.143404	0	0.979629	1.16741	100000	0.04578	1.18068	1.16741	0.99892	1.14363	0.631305	0.590562	0.63085	2020-05-04	26870.4	00:00:00	2020-04-12	29145	3.30119e+08	2022-04-22
2020-04-13	585290	585290	585290	195031	0	190290	422873	7023480	24888	1.09562		1	2020-04-13	0.0212752	0.0212752	0	0.0865067	0.0153714	0.598222	0.598222	0.0872787	0	0.978725	1.09562	100300	0.0455968	1.13152	1.09562	0.999077	1.07232	0.598222	0.535908	0.597358	2020-05-04	28061.9	00:00:00	2020-04-13	24888	3.30125e+08	2022-04-22
2020-04-14	611745	611745	611745	202208	0	185086	424245	7340940	26455	1.07278		1	2020-04-14	0.0222365	0.0222365	0	0.0835545	0.015421	0.548788	0.548788	0.0678431	0	0.977764	1.07278	100600	0.0454145	1.0842	1.07278	0.999018	1.04893	0.548788	0.469442	0.547575	2020-05-04	29323.4	00:00:00	2020-04-14	26455	3.3013e+08	2022-04-22
2020-04-15	644025	644025	644025	214642	0	177479	429560	7728300	32280	1.09556		1	2020-04-15	0.0234095	0.0234095	0	0.0795627	0.0156139	0.486447	0.486447	0.0872269	0	0.976591	1.09556	100900	0.0452328	1.08417	1.09556	0.9988	1.06992	0.486447	0.396228	0.484974	2020-05-04	30856.6	00:00:00	2020-04-15	32280	3.30136e+08	2022-04-22
2020-04-16	676339	676339	676339	226198	0	174339	432339	8116068	32314	1.0891		1	2020-04-16	0.0245836	0.0245836	0	0.0776116	0.0157147	0.415846	0.415846	0.081811	0	0.975416	1.0891	101200	0.0450519	1.09233	1.0891	0.998798	1.06233	0.415846	0.322038	0.414229	2020-05-04	32385.2	00:00:00	2020-04-16	32314	3.30141e+08	2022-04-22
2020-04-17	709201	709201	709201	233951	0	177944	433201	8510412	32862	1.0971		1	2020-04-17	0.0257777	0.0257777	0	0.0786664	0.0157458	0.342499	0.342499	0.0885087	0	0.974222	1.0971	101500	0.0448717	1.0931	1.0971	0.998776	1.06882	0.342499	0.252379	0.340868	2020-05-04	33933.5	00:00:00	2020-04-17	32862	3.30146e+08	2022-04-22
2020-04-18	737023	737023	737023	241041	0	176621	426523	8844276	27822	1.05497		1	2020-04-18	0.0267885	0.0267885	0	0.07754	0.0155028	0.271967	0.271967	0.0521061	0	0.973211	1.05497	101800	0.0446922	1.07604	1.05497	0.998962	1.02671	0.271967	0.1914	0.270444	2020-05-04	35239.1	00:00:00	2020-04-18	27822	3.30152e+08	2022-04-22
2020-04-19	764265	764265	764265	247215	0	178975	427938	9171180	27242	1.04165		1	2020-04-19	0.0277782	0.0277782	0	0.0780293	0.015554	0.208799	0.208799	0.0399876	0	0.972222	1.04165	102100	0.0445134	1.04831	1.04165	0.998983	1.01272	0.208799	0.141228	0.207471	2020-05-04	36512.3	00:00:00	2020-04-19	27242	3.30157e+08	2022-04-22
2020-04-20	792759	792759	792759	252094	0	181014	428731	9513108	28494	1.03724		1	2020-04-20	0.0288134	0.0288134	0	0.0783723	0.0155825	0.155711	0.155711	0.0359044	0	0.971187	1.03724	102400	0.0443354	1.03945	1.03724	0.998935	1.00736	0.155711	0.102024	0.154622	2020-05-04	37838.8	00:00:00	2020-04-20	28494	3.30163e+08	2022-04-22
2020-04-21	816385	816385	816385	256555	0	172360	421385	9796620	23626	0.979247		1	2020-04-21	0.0296716	0.0296716	0	0.0741098	0.0153153	0.113447	0.113447	0	0	0.970328	0.979247	102700	0.044158	1.00824	0.979247	0.999116	0.950191	0.113447	0.0726087	0.112597	2020-05-04	38934.2	00:00:00	2020-04-21	23626	3.30168e+08	2022-04-22
2020-04-22	848994	848994	848994	262268	0	172655	422335	10187928	32609	1.04832		1	2020-04-22	0.0308563	0.0308563	0	0.0737243	0.0153496	0.0812314	0.0812314	0.0460948	0	0.969144	1.04832	103000	0.0439814	1.01378	1.04832	0.998779	1.01597	0.0812314	0.0512009	0.0805932	2020-05-04	40440.1	00:00:00	2020-04-22	32609	3.30174e+08	2022-04-22
2020-04-23	879430	879430	879430	268581	0	170229	412884	10553160	30436	1.03063		1	2020-04-23	0.0319619	0.0319619	0	0.0721874	0.0150058	0.0574769	0.0574769	0.0297158	0	0.968038	1.03063	103300	0.0438055	1.03947	1.03063	0.998859	0.997685	0.0574769	0.0359644	0.0570121	2020-05-04	41840	00:00:00	2020-04-23	30436	3.30179e+08	2022-04-22
2020-04-24	925038	925038	925038	277445	0	188015	423038	11100456	45608	1.16643		1	2020-04-24	0.033619	0.033619	0	0.0791809	0.0153746	0.0403853	0.0403853	0.142684	0	0.966381	1.16643	103600	0.0436302	1.09853	1.16643	0.998288	1.12722	0.0403853	0.0252946	0.0400546	2020-05-04	43929.4	00:00:00	2020-04-24	45608	3.30184e+08	2022-04-22
2020-04-25	960525	960525	960525	288313	0	196260	429268	11526300	35487	1.09446		1	2020-04-25	0.0349081	0.0349081	0	0.0820849	0.0156008	0.028305	0.028305	0.08631	0	0.965092	1.09446	103900	0.0434557	1.13045	1.09446	0.998666	1.05626	0.028305	0.0179096	0.0280741	2020-05-04	45548.6	00:00:00	2020-04-25	35487	3.3019e+08	2022-04-22
2020-04-26	987322	987322	987322	293991	0	194563	426920	11847864	26797	1.02769		1	2020-04-26	0.0358814	0.0358814	0	0.0808163	0.0155152	0.0198761	0.0198761	0.0269414	0	0.964119	1.02769	104200	0.0432819	1.06108	1.02769	0.998992	0.990813	0.0198761	0.0128402	0.0197175	2020-05-04	46766.5	00:00:00	2020-04-26	26797	3.30195e+08	2022-04-22
2020-04-27	1010356	1010356	1010356	298004	0	193971	425066	12124272	23034	0.999728		1	2020-04-27	0.0367179	0.0367179	0	0.0800177	0.0154475	0.0140488	0.0140488	0	0	0.963282	0.999728	104500	0.0431088	1.01371	0.999728	0.999132	0.96302	0.0140488	0.00937982	0.0139416	2020-05-04	47809.1	00:00:00	2020-04-27	23034	3.30201e+08	2022-04-22
2020-04-28	1035765	1035765	1035765	303048	0	186771	424020	12429180	25409	0.97696		1	2020-04-28	0.0376407	0.0376407	0	0.0765197	0.0154093	0.0100459	0.0100459	0	0	0.962359	0.97696	104800	0.0429363	0.988344	0.97696	0.999042	0.940187	0.0100459	0.00702672	0.00997476	2020-05-04	48954.6	00:00:00	2020-04-28	25409	3.30206e+08	2022-04-22
2020-04-29	1064194	1064194	1064194	306158	0	184764	420169	12770328	28429	0.979414		1	2020-04-29	0.0386732	0.0386732	0	0.0751794	0.0152691	0.00730826	0.00730826	0	0	0.961327	0.979414	105100	0.0427646	0.978187	0.979414	0.998927	0.941537	0.00730826	0.0054306	0.00726219	2020-05-04	50231.1	00:00:00	2020-04-29	28429	3.30212e+08	2022-04-22
2020-04-30	1094464	1094464	1094464	310389	0	169426	418125	13133568	30270	0.984771		1	2020-04-30	0.0397725	0.0397725	0	0.0684673	0.0151946	0.00544148	0.00544148	0	0	0.960227	0.984771	105400	0.0425935	0.982093	0.984771	0.998856	0.945605	0.00544148	0.00434964	0.00541275	2020-05-04	51584.9	00:00:00	2020-04-30	30270	3.30217e+08	2022-04-22
2020-05-01	1129882	1129882	1129882	314318	0	169357	420681	13558584	35418	1.04886		0	2020-05-01	0.0410589	0.0410589	0.1	0.0679722	0.0152872	0.00417115	0.00417115	0.0465811	0.1	0.958941	1.04886	105700	0.0424231	1.01681	0.984771	0.99866	1.00579	0.00417115	0.00361814	0.00415436	2020-05-04	53162.6	00:00:00	2020-05-01	35418	3.30222e+08	2022-04-22
2020-05-02	1160774	1160774	1160774	319213	0	173452	423751	13929288	30892	1.02687		0	2020-05-02	0.0421808	0.0421808	0.1	0.069141	0.0153985	0.00330788	0.00330788	0.0261686	0.1	0.957819	1.02687	106000	0.0422535	1.03786	0.984771	0.99883	0.983558	0.00330788	0.00312305	0.00329927	2020-05-04	54533.1	00:00:00	2020-05-02	30892	3.30228e+08	2022-04-22
2020-05-03	1186073	1186073	1186073	323883	0	175717	421808	14232876	25299	0.983909		0	2020-05-03	0.0430995	0.0430995	0.1	0.0695668	0.0153276	0.00272166	0.00272166	0	0.1	0.956901	0.983909	106300	0.0420844	1.00539	0.984771	0.999041	0.941503	0.00272166	0.00278757	0.00271865	2020-05-04	55651.1	00:00:00	2020-05-03	25299	3.30233e+08	2022-04-22
2020-05-04	1210267	1210267	1210267	326823	0.4	174502	417508	14523204	24194	0.97144		0	2020-05-04	0.0439779	0.0439779	0.1	0.0686158	0.0151711	0.00232361	0.00232361	0	0.1	0.956022	0.97144	106600	0.0419161	0.977675	0.984771	0.999082	0.928718	0.00232361	0.00255972	0.00232443	2020-05-04	56715.9	00:00:00	2020-05-04	24194	3.30239e+08	2022-04-22
2020-05-05	1.23881e+06	0			0.4	174618	422427	1.48657e+07	28545	1.02663		0	2020-05-05	0.0450144		0.1	0.0681949	0.0153496	0.0020532	0.0020532	0.0259386	0.1	0.954986	0.97144	106900	0.0417484	0.999035	0.984771	0.998916	0.980416	0.0020532	0.00240436	0.00205661	00:00:00	57967.2	00:00:00	2020-05-05	-1210267	3.30244e+08	2022-04-22
2020-05-06	1.26734e+06	0			0.4	172879	418349	1.52081e+07	28531.4	1.02657		0	2020-05-06	0.0460504		0.1	0.0670576	0.0152012	0.00186925	0.00186925	0.0258811	0.1	0.95395	0.97144	107200	0.0415814	1.0266	0.984771	0.998915	0.979295	0.00186925	0.00229777	0.00187442	00:00:00	59212.9	00:00:00	2020-05-06	0	3.3025e+08	2022-04-22
2020-05-07	1.29585e+06	0			0	165971	416423	1.55502e+07	28509.8	1.03723		0	2020-05-07	0.0470855		0.1	0.0639416	0.015131	0.00174384	0.00174384	0.0358971	0.1	0.952914	0.97144	107500	0.0414151	1.0319	0.984771	0.998915	0.988395	0.00174384	0.00222399	0.0017502	00:00:00	60452.6	00:00:00	2020-05-07	0	3.30255e+08	2022-04-22
2020-05-08	1.32363e+06	0			0.4	162854	398590	1.58835e+07	27774.4	1.05368		0	2020-05-08	0.048094		0.1	0.0623156	0.0144827	0.00165804	0.00165804	0.0509471	0.1	0.951906	0.97144	107800	0.0412495	1.04546	0.984771	0.998942	1.00301	0.00165804	0.00217225	0.0016652	00:00:00	61655.6	00:00:00	2020-05-08	0	3.3026e+08	2022-04-22
2020-05-09	1.35103e+06	0			0	164953	390501	1.62123e+07	27398.6	1.06045		0	2020-05-09	0.0490887		0.1	0.0626921	0.0141886	0.00159901	0.00159901	0.0569998	0.1	0.950911	0.97144	108100	0.0410845	1.05706	0.984771	0.998955	1.00839	0.00159901	0.00213531	0.0016067	00:00:00	62837.5	00:00:00	2020-05-09	0	3.30266e+08	2022-04-22
2020-05-10	1.37897e+06	0			0	168704	391649	1.65476e+07	27944.3	1.06891		0	2020-05-10	0.0501032		0.1	0.0636842	0.0142301	0.00155807	0.00155807	0.0644713	0.1	0.949897	0.97144	108400	0.0409201	1.06468	0.984771	0.998933	1.01536	0.00155807	0.00210832	0.00156611	00:00:00	64038.2	00:00:00	2020-05-10	0	3.30271e+08	2022-04-22
2020-05-11	1.40773e+06	0			0.4	168919	397375	1.68928e+07	28760.6	1.07683		0	2020-05-11	0.0511473		0.1	0.0633352	0.0144379	0.00152936	0.00152936	0.0713522	0.1	0.948853	0.97144	108700	0.0407564	1.07287	0.984771	0.998901	1.02176	0.00152936	0.002088	0.00153762	00:00:00	65269	00:00:00	2020-05-11	0	3.30277e+08	2022-04-22
2020-05-12	1.43665e+06	0			0	169308	400886	1.72398e+07	28920.3	1.08262		0	2020-05-12	0.0521972		0.1	0.0630531	0.0145652	0.0015089	0.0015089	0.0763171	0.1	0.947803	0.97144	109000	0.0405934	1.07973	0.984771	0.998893	1.02611	0.0015089	0.00207216	0.0015173	00:00:00	66501.7	00:00:00	2020-05-12	0	3.30282e+08	2022-04-22
2020-05-13	1.46575e+06	0			0.4	169901	401561	1.75891e+07	29103.1	1.08817		0	2020-05-13	0.0532538		0.1	0.062848	0.0145895	0.00149401	0.00149401	0.0810233	0.1	0.946746	0.97144	109300	0.040431	1.08539	0.984771	0.998885	1.03022	0.00149401	0.00205932	0.0015025	00:00:00	67737.2	00:00:00	2020-05-13	0	3.30288e+08	2022-04-22
2020-05-14	1.49506e+06	0			0	171429	400592	1.79407e+07	29301.6	1.09298		0	2020-05-14	0.0543174		0.1	0.0629864	0.0145541	0.00148288	0.00148288	0.0850702	0.1	0.945683	0.97144	109600	0.0402693	1.09057	0.984771	0.998876	1.03361	0.00148288	0.00204852	0.00149141	00:00:00	68976.1	00:00:00	2020-05-14	0	3.30293e+08	2022-04-22
2020-05-15	1.5247e+06	0			0.4	173671	394815	1.82964e+07	29640.8	1.09702		0	2020-05-15	0.0553934		0.1	0.0633815	0.0143439	0.00147429	0.00147429	0.0884367	0.1	0.944607	0.97144	109900	0.0401082	1.095	0.984771	0.998862	1.03625	0.00147429	0.00203907	0.00148284	00:00:00	70224.4	00:00:00	2020-05-15	0	3.30298e+08	2022-04-22
2020-05-16	1.55479e+06	0			0	175819	394016	1.86575e+07	30092.8	1.10061		0	2020-05-16	0.0564858		0.1	0.063735	0.0143147	0.00146742	0.00146742	0.091417	0.1	0.943514	0.97144	110200	0.0399478	1.09882	0.984771	0.998844	1.03845	0.00146742	0.00203055	0.00147596	00:00:00	71486.7	00:00:00	2020-05-16	0	3.30304e+08	2022-04-22
2020-05-17	1.58531e+06	0			0	177575	399233	1.90237e+07	30515.8	1.10373		0	2020-05-17	0.0575935		0.1	0.0639397	0.014504	0.0014617	0.0014617	0.0939788	0.1	0.942407	0.97144	110500	0.039788	1.10217	0.984771	0.998826	1.04016	0.0014617	0.00202266	0.00147023	00:00:00	72761.5	00:00:00	2020-05-17	0	3.30309e+08	2022-04-22
2020-05-18	1.61616e+06	0			0.4	179513	405898	1.9394e+07	30859.2	1.10641		0	2020-05-18	0.0587136		0.1	0.064205	0.0147459	0.00145677	0.00145677	0.0961789	0.1	0.941286	0.97144	110800	0.0396289	1.10507	0.984771	0.998811	1.04145	0.00145677	0.00201519	0.00146527	00:00:00	74045.6	00:00:00	2020-05-18	0	3.30315e+08	2022-04-22
2020-05-19	1.64739e+06	0			0	181636	408578	1.97687e+07	31225.3	1.10876		0	2020-05-19	0.059847		0.1	0.0645294	0.014843	0.00145236	0.00145236	0.098094	0.1	0.940153	0.97144	111100	0.0394703	1.10759	0.984771	0.998796	1.04241	0.00145236	0.00200801	0.00146084	00:00:00	75339.7	00:00:00	2020-05-19	0	3.3032e+08	2022-04-22
2020-05-20	1.679e+06	0			0.4	183948	411661	2.01481e+07	31614.3	1.1108		0	2020-05-20	0.0609945		0.1	0.0649144	0.0149547	0.00144832	0.00144832	0.0997479	0.1	0.939005	0.97144	111400	0.0393125	1.10978	0.984771	0.998779	1.04305	0.00144832	0.00200105	0.00145676	00:00:00	76644.7	00:00:00	2020-05-20	0	3.30326e+08	2022-04-22
2020-05-21	1.71103e+06	0			0	186336	415180	2.05324e+07	32028.7	1.11257		0	2020-05-21	0.062157		0.1	0.0653181	0.0150823	0.00144452	0.00144452	0.101179	0.1	0.937843	0.97144	111700	0.0391552	1.11168	0.984771	0.998762	1.04341	0.00144452	0.00199423	0.00145293	00:00:00	77961.5	00:00:00	2020-05-21	0	3.30331e+08	2022-04-22
2020-05-22	1.74348e+06	0			0.4	188692	419855	2.09218e+07	32449.1	1.11411		0	2020-05-22	0.0633348		0.1	0.0657031	0.0152519	0.0014409	0.0014409	0.10242	0.1	0.936665	0.97144	112000	0.0389986	1.11334	0.984771	0.998744	1.04355	0.0014409	0.00198752	0.00144927	00:00:00	79290.2	00:00:00	2020-05-22	0	3.30336e+08	2022-04-22
2020-05-23	1.77634e+06	0			0	191034	425314	2.13161e+07	32857.5	1.11544		0	2020-05-23	0.0645273		0.1	0.0660754	0.0154499	0.00143738	0.00143738	0.103495	0.1	0.935473	0.97144	112300	0.0388426	1.11477	0.984771	0.998727	1.04347	0.00143738	0.00198089	0.00144572	00:00:00	80630.3	00:00:00	2020-05-23	0	3.30342e+08	2022-04-22
2020-05-24	1.8096e+06	0			0	193432	430627	2.17152e+07	33257.5	1.1166		0	2020-05-24	0.0657343		0.1	0.0664597	0.0156427	0.00143395	0.00143395	0.104427	0.1	0.934266	0.97144	112600	0.0386872	1.11602	0.984771	0.99871	1.0432	0.00143395	0.00197433	0.00144225	00:00:00	81981.3	00:00:00	2020-05-24	0	3.30347e+08	2022-04-22
2020-05-25	1.84326e+06	0			0.4	195869	435528	2.21191e+07	33662	1.11761		0	2020-05-25	0.066956		0.1	0.0668497	0.0158205	0.00143058	0.00143058	0.105235	0.1	0.933044	0.97144	112900	0.0385325	1.11711	0.984771	0.998692	1.04278	0.00143058	0.00196781	0.00143884	00:00:00	83343.2	00:00:00	2020-05-25	0	3.30353e+08	2022-04-22
2020-05-26	1.87733e+06	0			0	198323	440676	2.25279e+07	34068.2	1.11849		0	2020-05-26	0.0681924		0.1	0.0672377	0.0160072	0.00142725	0.00142725	0.105936	0.1	0.931808	0.97144	113200	0.0383784	1.11805	0.984771	0.998675	1.04222	0.00142725	0.00196135	0.00143547	00:00:00	84716.1	00:00:00	2020-05-26	0	3.30358e+08	2022-04-22
2020-05-27	1.9118e+06	0			0.4	200767	446046	2.29416e+07	34472.7	1.11925		0	2020-05-27	0.0694435		0.1	0.0676149	0.016202	0.00142396	0.00142396	0.106545	0.1	0.930557	0.97144	113500	0.0382248	1.11887	0.984771	0.998657	1.04153	0.00142396	0.00195492	0.00143213	00:00:00	86099.7	00:00:00	2020-05-27	0	3.30364e+08	2022-04-22
2020-05-28	1.94667e+06	0			0	203189	451615	2.33601e+07	34871.3	1.11991		0	2020-05-28	0.070709		0.1	0.0679772	0.016404	0.00142068	0.00142068	0.107073	0.1	0.929291	0.97144	113800	0.0380719	1.11958	0.984771	0.99864	1.04072	0.00142068	0.00194852	0.00142882	00:00:00	87493.7	00:00:00	2020-05-28	0	3.30369e+08	2022-04-22
2020-05-29	1.98193e+06	0			0.4	205594	457236	2.37832e+07	35262.1	1.12049		0	2020-05-29	0.0719886		0.1	0.0683264	0.0166079	0.00141743	0.00141743	0.107531	0.1	0.928011	0.97144	114100	0.0379197	1.1202	0.984771	0.998623	1.03982	0.00141743	0.00194217	0.00142553	00:00:00	88897.6	00:00:00	2020-05-29	0	3.30375e+08	2022-04-22
2020-05-30	2.01758e+06	0			0	207982	462790	2.4211e+07	35646.1	1.12099		0	2020-05-30	0.0732822		0.1	0.0686632	0.0168094	0.00141419	0.00141419	0.107928	0.1	0.926718	0.97144	114400	0.037768	1.12074	0.984771	0.998606	1.03884	0.00141419	0.00193584	0.00142226	00:00:00	90311.2	00:00:00	2020-05-30	0	3.3038e+08	2022-04-22
2020-05-31	2.0536e+06	0			0	210344	468298	2.46432e+07	36023.9	1.12142		0	2020-05-31	0.0745894		0.1	0.0689843	0.0170092	0.00141097	0.00141097	0.108274	0.1	0.925411	0.97144	114700	0.0376169	1.1212	0.984771	0.998589	1.03777	0.00141097	0.00192954	0.001419	00:00:00	91734.1	00:00:00	2020-05-31	0	3.30385e+08	2022-04-22
2020-06-01	2.09e+06	0			0.4	212670	473833	2.508e+07	36393.9	1.1218		0	2020-06-01	0.07591		0.1	0.0692868	0.0172099	0.00140777	0.00140777	0.108573	0.1	0.92409	0.97144	115000	0.0374664	1.12161	0.984771	0.998573	1.03664	0.00140777	0.00192327	0.00141575	00:00:00	93165.8	00:00:00	2020-06-01	0	3.30391e+08	2022-04-22
2020-06-02	2.12675e+06	0			0	214952	479362	2.5521e+07	36754.5	1.12213		0	2020-06-02	0.0772437		0.1	0.0695686	0.0174104	0.00140457	0.00140457	0.108834	0.1	0.922756	0.97144	115300	0.0373166	1.12196	0.984771	0.998557	1.03545	0.00140457	0.00191703	0.00141251	00:00:00	94605.9	00:00:00	2020-06-02	0	3.30396e+08	2022-04-22
2020-06-03	2.16386e+06	0			0.4	217185	484852	2.59663e+07	37104.6	1.12241		0	2020-06-03	0.07859		0.1	0.0698286	0.0176096	0.00140138	0.00140138	0.10906	0.1	0.92141	0.97144	115600	0.0371673	1.12227	0.984771	0.998541	1.0342	0.00140138	0.00191082	0.00140929	00:00:00	96054	00:00:00	2020-06-03	0	3.30402e+08	2022-04-22
2020-06-04	2.2013e+06	0			0	219367	490267	2.64156e+07	37443.7	1.12266		0	2020-06-04	0.0799487		0.1	0.0700661	0.0178059	0.00139821	0.00139821	0.109256	0.1	0.920051	0.97144	115900	0.0370186	1.12253	0.984771	0.998525	1.0329	0.00139821	0.00190463	0.00140608	00:00:00	97509.4	00:00:00	2020-06-04	0	3.30407e+08	2022-04-22
2020-06-05	2.23907e+06	0			0.4	221492	495589	2.68689e+07	37771.3	1.12287		0	2020-06-05	0.0813191		0.1	0.07028	0.0179989	0.00139505	0.00139505	0.109427	0.1	0.918681	0.97144	116200	0.0368706	1.12276	0.984771	0.99851	1.03156	0.00139505	0.00189848	0.00140288	00:00:00	98971.7	00:00:00	2020-06-05	0	3.30413e+08	2022-04-22
2020-06-06	2.27716e+06	0			0	223555	500819	2.73259e+07	38086.7	1.12306		0	2020-06-06	0.082701		0.1	0.0704688	0.0181885	0.00139189	0.00139189	0.109575	0.1	0.917299	0.97144	116500	0.0367231	1.12297	0.984771	0.998496	1.03018	0.00139189	0.00189235	0.00139969	00:00:00	100440	00:00:00	2020-06-06	0	3.30418e+08	2022-04-22
2020-06-07	2.31555e+06	0			0	225550	505950	2.77866e+07	38389.2	1.12322		0	2020-06-07	0.0840938		0.1	0.0706315	0.0183746	0.00138875	0.00138875	0.109703	0.1	0.915906	0.97144	116800	0.0365762	1.12314	0.984771	0.998482	1.02877	0.00138875	0.00188625	0.00139651	00:00:00	101915	00:00:00	2020-06-07	0	3.30423e+08	2022-04-22
2020-06-08	2.35423e+06	0			0.4	227473	510966	2.82507e+07	38677.9	1.12336		0	2020-06-08	0.0854971		0.1	0.0707671	0.0185565	0.00138562	0.00138562	0.109815	0.1	0.914503	0.97144	117100	0.0364299	1.12329	0.984771	0.998468	1.02732	0.00138562	0.00188017	0.00139334	00:00:00	103394	00:00:00	2020-06-08	0	3.30429e+08	2022-04-22
2020-06-09	2.39318e+06	0			0	229321	515850	2.87181e+07	38952.2	1.12348		0	2020-06-09	0.0869103		0.1	0.0708749	0.0187335	0.0013825	0.0013825	0.109912	0.1	0.91309	0.97144	117400	0.0362842	1.12342	0.984771	0.998455	1.02584	0.0013825	0.00187412	0.00139018	00:00:00	104878	00:00:00	2020-06-09	0	3.30434e+08	2022-04-22
2020-06-10	2.43239e+06	0			0.4	231089	520589	2.91887e+07	39211.6	1.12359		0	2020-06-10	0.0883328		0.1	0.0709543	0.0189053	0.00137938	0.00137938	0.109996	0.1	0.911667	0.97144	117700	0.036139	1.12354	0.984771	0.998442	1.02434	0.00137938	0.0018681	0.00138703	00:00:00	106366	00:00:00	2020-06-10	0	3.3044e+08	2022-04-22
2020-06-11	2.47184e+06	0			0	232773	525173	2.96621e+07	39455.5	1.12368		0	2020-06-11	0.0897642		0.1	0.0710046	0.0190715	0.00137628	0.00137628	0.11007	0.1	0.910236	0.97144	118000	0.0359945	1.12364	0.984771	0.99843	1.02282	0.00137628	0.00186211	0.00138389	00:00:00	107857	00:00:00	2020-06-11	0	3.30445e+08	2022-04-22
2020-06-12	2.51153e+06	0			0.4	234370	529595	3.01383e+07	39683.5	1.12376		0	2020-06-12	0.0912038		0.1	0.0710251	0.0192317	0.00137318	0.00137318	0.110133	0.1	0.908796	0.97144	118300	0.0358505	1.12372	0.984771	0.998418	1.02127	0.00137318	0.00185614	0.00138076	00:00:00	109351	00:00:00	2020-06-12	0	3.30451e+08	2022-04-22
2020-06-13	2.55142e+06	0			0	235876	533844	3.06171e+07	39895.1	1.12383		0	2020-06-13	0.092651		0.1	0.0710155	0.0193857	0.0013701	0.0013701	0.110189	0.1	0.907349	0.97144	118600	0.0357071	1.1238	0.984771	0.998408	1.01971	0.0013701	0.00185019	0.00137764	00:00:00	110847	00:00:00	2020-06-13	0	3.30456e+08	2022-04-22
2020-06-14	2.59151e+06	0			0	237288	537909	3.10982e+07	40089.6	1.12389		0	2020-06-14	0.0941053		0.1	0.0709752	0.019533	0.00136703	0.00136703	0.110237	0.1	0.905895	0.97144	118900	0.0355643	1.12386	0.984771	0.998397	1.01813	0.00136703	0.00184428	0.00137452	00:00:00	112344	00:00:00	2020-06-14	0	3.30461e+08	2022-04-22
2020-06-15	2.63178e+06	0			0.4	238602	541782	3.15814e+07	40266.8	1.12395		0	2020-06-15	0.0955659		0.1	0.0709041	0.0196733	0.00136396	0.00136396	0.110278	0.1	0.904434	0.97144	119200	0.035422	1.12392	0.984771	0.998388	1.01654	0.00136396	0.00183839	0.00137142	00:00:00	113841	00:00:00	2020-06-15	0	3.30467e+08	2022-04-22
2020-06-16	2.67221e+06	0			0	239817	545454	3.20665e+07	40426.3	1.12399		0	2020-06-16	0.0970323		0.1	0.0708018	0.0198063	0.00136091	0.00136091	0.110315	0.1	0.902968	0.97144	119500	0.0352803	1.12397	0.984771	0.998379	1.01493	0.00136091	0.00183252	0.00136833	00:00:00	115339	00:00:00	2020-06-16	0	3.30472e+08	2022-04-22
2020-06-17	2.71277e+06	0			0.4	240929	548917	3.25533e+07	40567.6	1.12403		0	2020-06-17	0.0985037		0.1	0.0706682	0.0199318	0.00135786	0.00135786	0.110346	0.1	0.901496	0.97144	119800	0.0351392	1.12401	0.984771	0.99837	1.01331	0.00135786	0.00182668	0.00136525	00:00:00	116836	00:00:00	2020-06-17	0	3.30478e+08	2022-04-22
2020-06-18	2.75346e+06	0			0	241936	552164	3.30416e+07	40690.6	1.12407		0	2020-06-18	0.0999796		0.1	0.0705031	0.0200493	0.00135482	0.00135482	0.110373	0.1	0.90002	0.97144	120100	0.0349986	1.12405	0.984771	0.998363	1.01168	0.00135482	0.00182086	0.00136218	00:00:00	118331	00:00:00	2020-06-18	0	3.30483e+08	2022-04-22
2020-06-19	2.79426e+06	0			0.4	242836	555187	3.35311e+07	40794.9	1.1241		0	2020-06-19	0.101459		0.1	0.0703067	0.0201588	0.0013518	0.0013518	0.110397	0.1	0.898541	0.97144	120400	0.0348586	1.12408	0.984771	0.998356	1.01005	0.0013518	0.00181507	0.00135912	00:00:00	119824	00:00:00	2020-06-19	0	3.30489e+08	2022-04-22
2020-06-20	2.83514e+06	0			0	243626	557981	3.40217e+07	40880.2	1.12412		0	2020-06-20	0.102942		0.1	0.0700788	0.0202599	0.00134878	0.00134878	0.110418	0.1	0.897058	0.97144	120700	0.0347192	1.12411	0.984771	0.99835	1.0084	0.00134878	0.00180931	0.00135606	00:00:00	121315	00:00:00	2020-06-20	0	3.30494e+08	2022-04-22
2020-06-21	2.87609e+06	0			0	244306	560538	3.4513e+07	40946.5	1.12415		0	2020-06-21	0.104427		0.1	0.0698197	0.0203524	0.00134577	0.00134577	0.110436	0.1	0.895573	0.97144	121000	0.0345803	1.12413	0.984771	0.998345	1.00675	0.00134577	0.00180357	0.00135302	00:00:00	122801	00:00:00	2020-06-21	0	3.30499e+08	2022-04-22
2020-06-22	2.91708e+06	0			0.4	244873	562854	3.50049e+07	40993.4	1.12417		0	2020-06-22	0.105914		0.1	0.0695295	0.0204361	0.00134277	0.00134277	0.110451	0.1	0.894086	0.97144	121300	0.034442	1.12416	0.984771	0.99834	1.0051	0.00134277	0.00179785	0.00134998	00:00:00	124284	00:00:00	2020-06-22	0	3.30505e+08	2022-04-22
2020-06-23	2.9581e+06	0			0	245327	564923	3.54972e+07	41021	1.12418		0	2020-06-23	0.107401		0.1	0.0692084	0.0205109	0.00133978	0.00133978	0.110465	0.1	0.892599	0.97144	121600	0.0343042	1.12417	0.984771	0.998336	1.00344	0.00133978	0.00179216	0.00134696	00:00:00	125761	00:00:00	2020-06-23	0	3.3051e+08	2022-04-22
2020-06-24	2.99913e+06	0			0.4	245665	566740	3.59896e+07	41029.1	1.1242		0	2020-06-24	0.108889		0.1	0.0688568	0.0205766	0.0013368	0.0013368	0.110477	0.1	0.891111	0.97144	121900	0.034167	1.12419	0.984771	0.998333	1.00178	0.0013368	0.00178649	0.00134394	00:00:00	127233	00:00:00	2020-06-24	0	3.30516e+08	2022-04-22
2020-06-25	3.04015e+06	0			0	245888	568302	3.64818e+07	41017.7	1.12421		0	2020-06-25	0.110376		0.1	0.0684751	0.020633	0.00133383	0.00133383	0.110487	0.1	0.889624	0.97144	122200	0.0340304	1.1242	0.984771	0.998331	1.00012	0.00133383	0.00178085	0.00134094	00:00:00	128699	00:00:00	2020-06-25	0	3.30521e+08	2022-04-22
2020-06-26	3.08113e+06	0			0.4	245995	569606	3.69736e+07	40986.8	1.12422		0	2020-06-26	0.111863		0.1	0.0680637	0.0206799	0.00133086	0.00133086	0.110496	0.1	0.888137	0.97144	122500	0.0338942	1.12422	0.984771	0.998329	0.998463	0.00133086	0.00177523	0.00133794	00:00:00	130158	00:00:00	2020-06-26	0	3.30527e+08	2022-04-22
2020-06-27	3.12207e+06	0			0	245985	570647	3.74648e+07	40936.5	1.12423		0	2020-06-27	0.113347		0.1	0.067623	0.0207174	0.00132791	0.00132791	0.110504	0.1	0.886653	0.97144	122800	0.0337587	1.12423	0.984771	0.998329	0.996803	0.00132791	0.00176963	0.00133495	00:00:00	131609	00:00:00	2020-06-27	0	3.30532e+08	2022-04-22
2020-06-28	3.16294e+06	0			0	245858	571424	3.79552e+07	40866.7	1.12424		0	2020-06-28	0.114829		0.1	0.0671538	0.0207453	0.00132497	0.00132497	0.11051	0.1	0.885171	0.97144	123100	0.0336236	1.12424	0.984771	0.998329	0.995145	0.00132497	0.00176406	0.00133197	00:00:00	133051	00:00:00	2020-06-28	0	3.30537e+08	2022-04-22
2020-06-29	3.20371e+06	0			0.4	245614	571935	3.84446e+07	40777.6	1.12425		0	2020-06-29	0.116307		0.1	0.0666565	0.0207635	0.00132203	0.00132203	0.110516	0.1	0.883693	0.97144	123400	0.0334891	1.12424	0.984771	0.99833	0.993489	0.00132203	0.00175852	0.001329	00:00:00	134485	00:00:00	2020-06-29	0	3.30543e+08	2022-04-22
2020-06-30	3.24438e+06	0			0	245255	572178	3.89326e+07	40669.5	1.12425		0	2020-06-30	0.117782		0.1	0.0661319	0.020772	0.0013191	0.0013191	0.110521	0.1	0.882218	0.97144	123700	0.0333552	1.12425	0.984771	0.998331	0.991837	0.0013191	0.00175299	0.00132604	00:00:00	135910	00:00:00	2020-06-30	0	3.30548e+08	2022-04-22
2020-07-01	3.2863e+06	0			0.4	246157	573531	3.94357e+07	41920.4	1.16247		0	2020-07-01	0.119302		0.2	0.0659498	0.0208207	0.00131618	0.00131618	0.139765	0.2	0.880698	0.97144	124000	0.0332218	1.14336	0.984771	0.998277	1.02379	0.00131618	0.00174749	0.00132309	00:00:00	137372	00:00:00	2020-07-01	0	3.30554e+08	2022-04-22
2020-07-02	3.32865e+06	0			0	247518	575188	3.99438e+07	42347.5	1.17203		0	2020-07-02	0.120837		0.2	0.0658897	0.0208805	0.00131328	0.00131328	0.146781	0.2	0.879163	0.97144	124300	0.0330889	1.16725	0.984771	0.998257	1.03041	0.00131328	0.00174201	0.00132015	00:00:00	138843	00:00:00	2020-07-02	0	3.30559e+08	2022-04-22
2020-07-03	3.37159e+06	0			0.4	249522	577334	4.04591e+07	42940.7	1.18398		0	2020-07-03	0.122394		0.2	0.0659983	0.0209581	0.00131037	0.00131037	0.15539	0.2	0.877606	0.97144	124600	0.0329565	1.178	0.984771	0.998229	1.03907	0.00131037	0.00173656	0.00131721	00:00:00	140329	00:00:00	2020-07-03	0	3.30565e+08	2022-04-22
2020-07-04	3.41535e+06	0			0	252412	580210	4.09842e+07	43756.6	1.19891		0	2020-07-04	0.12398		0.2	0.0663359	0.0210622	0.00130748	0.00130748	0.165908	0.2	0.87602	0.97144	124900	0.0328247	1.19144	0.984771	0.998192	1.05027	0.00130748	0.00173112	0.00131429	00:00:00	141837	00:00:00	2020-07-04	0	3.3057e+08	2022-04-22
2020-07-05	3.45987e+06	0			0	256154	583783	4.15184e+07	44519.1	1.20802		0	2020-07-05	0.125594		0.2	0.0668893	0.0211915	0.0013046	0.0013046	0.172198	0.2	0.874406	0.97144	125200	0.0326934	1.20346	0.984771	0.998158	1.0563	0.0013046	0.00172572	0.00131137	00:00:00	143366	00:00:00	2020-07-05	0	3.30576e+08	2022-04-22
2020-07-06	3.5053e+06	0			0.4	260916	588221	4.20636e+07	45431.6	1.21701		0	2020-07-06	0.127241		0.2	0.067698	0.0213523	0.00130173	0.00130173	0.178317	0.2	0.872759	0.97144	125500	0.0325626	1.21252	0.984771	0.998116	1.06216	0.00130173	0.00172033	0.00130847	00:00:00	144919	00:00:00	2020-07-06	0	3.30581e+08	2022-04-22
2020-07-07	3.5518e+06	0			0	265498	593702	4.26216e+07	46502.5	1.22527		0	2020-07-07	0.128927		0.2	0.0684478	0.0215509	0.00129886	0.00129886	0.183856	0.2	0.871073	0.97144	125800	0.0324324	1.22114	0.984771	0.998068	1.0673	0.00129886	0.00171496	0.00130557	00:00:00	146503	00:00:00	2020-07-07	0	3.30586e+08	2022-04-22
2020-07-08	3.59928e+06	0			0.4	270632	600155	4.31914e+07	47481.8	1.23186		0	2020-07-08	0.130649		0.2	0.069327	0.0217848	0.001296	0.001296	0.188222	0.2	0.869351	0.97144	126100	0.0323026	1.22857	0.984771	0.998024	1.07092	0.001296	0.00170962	0.00130268	00:00:00	148113	00:00:00	2020-07-08	0	3.30592e+08	2022-04-22
2020-07-09	3.64782e+06	0			0	276230	607675	4.37739e+07	48538.2	1.23783		0	2020-07-09	0.132408		0.2	0.0703106	0.0220574	0.00129316	0.00129316	0.192132	0.2	0.867592	0.97144	126400	0.0321734	1.23485	0.984771	0.997976	1.07393	0.00129316	0.0017043	0.0012998	00:00:00	149753	00:00:00	2020-07-09	0	3.30597e+08	2022-04-22
2020-07-10	3.69747e+06	0			0.4	282123	616338	4.43697e+07	49649.6	1.24303		0	2020-07-10	0.134208		0.2	0.071354	0.0223714	0.00129032	0.00129032	0.195514	0.2	0.865792	0.97144	126700	0.0320447	1.24043	0.984771	0.997925	1.0762	0.00129032	0.001699	0.00129693	00:00:00	151423	00:00:00	2020-07-10	0	3.30603e+08	2022-04-22
2020-07-11	3.74826e+06	0			0	288388	626186	4.49791e+07	50784.3	1.24747		0	2020-07-11	0.13605		0.2	0.0724752	0.0227285	0.00128748	0.00128748	0.198376	0.2	0.86395	0.97144	127000	0.0319165	1.24525	0.984771	0.997874	1.07775	0.00128748	0.00169373	0.00129406	00:00:00	153125	00:00:00	2020-07-11	0	3.30608e+08	2022-04-22
2020-07-12	3.80022e+06	0			0	294920	637283	4.56026e+07	51963.7	1.25137		0	2020-07-12	0.137933		0.2	0.0736464	0.0231309	0.00128466	0.00128466	0.200875	0.2	0.862067	0.97144	127300	0.0317889	1.24942	0.984771	0.997819	1.07876	0.00128466	0.00168848	0.00129121	00:00:00	154860	00:00:00	2020-07-12	0	3.30614e+08	2022-04-22
2020-07-13	3.85339e+06	0			0.4	301586	649674	4.62407e+07	53168.3	1.25475		0	2020-07-13	0.139861		0.2	0.0748333	0.0235803	0.00128185	0.00128185	0.203031	0.2	0.860139	0.97144	127600	0.0316617	1.25306	0.984771	0.997764	1.07926	0.00128185	0.00168324	0.00128836	00:00:00	156627	00:00:00	2020-07-13	0	3.30619e+08	2022-04-22
2020-07-14	3.90776e+06	0			0.4	308479	663380	4.68932e+07	54375.2	1.25769		0	2020-07-14	0.141832		0.2	0.0760588	0.0240773	0.00127904	0.00127904	0.204889	0.2	0.858168	0.97144	127900	0.0315351	1.25622	0.984771	0.997708	1.07931	0.00127904	0.00167803	0.00128552	00:00:00	158428	00:00:00	2020-07-14	0	3.30624e+08	2022-04-22
2020-07-15	3.96337e+06	0			0.4	315544	677062	4.75604e+07	55603.3	1.26024		0	2020-07-15	0.143848		0.2	0.0773082	0.0245736	0.00127624	0.00127624	0.206501	0.2	0.856152	0.97144	128200	0.0314089	1.25896	0.984771	0.997651	1.07896	0.00127624	0.00167284	0.0012827	00:00:00	160261	00:00:00	2020-07-15	0	3.3063e+08	2022-04-22
2020-07-16	4.02021e+06	0			0.4	322738	691558	4.82425e+07	56843	1.26246		0	2020-07-16	0.145909		0.2	0.0785705	0.0250992	0.00127345	0.00127345	0.207895	0.2	0.854091	0.97144	128500	0.0312833	1.26135	0.984771	0.997593	1.07825	0.00127345	0.00166768	0.00127987	00:00:00	162129	00:00:00	2020-07-16	0	3.30635e+08	2022-04-22
2020-07-17	4.0783e+06	0			0.4	330041	706705	4.89396e+07	58087.4	1.26438		0	2020-07-17	0.148014		0.2	0.0798406	0.0256486	0.00127067	0.00127067	0.209101	0.2	0.851986	0.97144	128800	0.0311582	1.26342	0.984771	0.997534	1.07724	0.00127067	0.00166253	0.00127706	00:00:00	164029	00:00:00	2020-07-17	0	3.30641e+08	2022-04-22
2020-07-18	4.13763e+06	0			0.4	337411	722282	4.96516e+07	59333.9	1.26606		0	2020-07-18	0.150165		0.2	0.0811081	0.0262135	0.0012679	0.0012679	0.210147	0.2	0.849835	0.97144	129100	0.0310335	1.26522	0.984771	0.997475	1.07594	0.0012679	0.0016574	0.00127426	00:00:00	165962	00:00:00	2020-07-18	0	3.30646e+08	2022-04-22
2020-07-19	4.19821e+06	0			0.4	344818	738338	5.03785e+07	60575.2	1.26751		0	2020-07-19	0.152361		0.2	0.0823657	0.0267957	0.00126513	0.00126513	0.211054	0.2	0.847639	0.97144	129400	0.0309094	1.26679	0.984771	0.997416	1.07439	0.00126513	0.0016523	0.00127146	00:00:00	167928	00:00:00	2020-07-19	0	3.30652e+08	2022-04-22
2020-07-20	4.26001e+06	0			0.4	352249	754713	5.11202e+07	61806.6	1.26878		0	2020-07-20	0.154602		0.2	0.0836104	0.0273896	0.00126238	0.00126238	0.21184	0.2	0.845398	0.97144	129700	0.0307858	1.26815	0.984771	0.997357	1.07262	0.00126238	0.00164722	0.00126868	00:00:00	169926	00:00:00	2020-07-20	0	3.30657e+08	2022-04-22
2020-07-21	4.32304e+06	0			0.4	359672	771237	5.18765e+07	63026.3	1.26988		0	2020-07-21	0.156886		0.2	0.0848346	0.0279888	0.00125963	0.00125963	0.212521	0.2	0.843114	0.97144	130000	0.0306626	1.26933	0.984771	0.997297	1.07065	0.00125963	0.00164215	0.0012659	00:00:00	171955	00:00:00	2020-07-21	0	3.30662e+08	2022-04-22
2020-07-22	4.38727e+06	0			0.4	367058	787984	5.26472e+07	64228.7	1.27083		0	2020-07-22	0.159215		0.2	0.0860318	0.0285961	0.00125689	0.00125689	0.213112	0.2	0.840785	0.97144	130300	0.03054	1.27035	0.984771	0.997238	1.06849	0.00125689	0.00163711	0.00126313	00:00:00	174015	00:00:00	2020-07-22	0	3.30668e+08	2022-04-22
2020-07-23	4.45268e+06	0			0.4	374380	804855	5.34321e+07	65409.3	1.27166		0	2020-07-23	0.161586		0.2	0.0871962	0.0292079	0.00125416	0.00125416	0.213625	0.2	0.838414	0.97144	130600	0.0304178	1.27124	0.984771	0.99718	1.06618	0.00125416	0.00163209	0.00126036	00:00:00	176104	00:00:00	2020-07-23	0	3.30673e+08	2022-04-22
2020-07-24	4.51924e+06	0			0.4	381610	821769	5.42309e+07	66563.5	1.27238		0	2020-07-24	0.163999		0.2	0.0883216	0.0298212	0.00125143	0.00125143	0.214071	0.2	0.836001	0.97144	130900	0.0302961	1.27202	0.984771	0.997122	1.06371	0.00125143	0.00162709	0.00125761	00:00:00	178222	00:00:00	2020-07-24	0	3.30679e+08	2022-04-22
2020-07-25	4.58693e+06	0			0.4	388721	838671	5.50431e+07	67687	1.273		0	2020-07-25	0.166452		0.2	0.0894028	0.030434	0.00124872	0.00124872	0.214457	0.2	0.833548	0.97144	131200	0.030175	1.27269	0.984771	0.997065	1.06111	0.00124872	0.00162211	0.00125486	00:00:00	180366	00:00:00	2020-07-25	0	3.30684e+08	2022-04-22
2020-07-26	4.6557e+06	0			0.4	395690	855483	5.58684e+07	68775.4	1.27355		0	2020-07-26	0.168945		0.2	0.0904348	0.0310436	0.00124601	0.00124601	0.214792	0.2	0.831055	0.97144	131500	0.0300543	1.27328	0.984771	0.997009	1.05839	0.00124601	0.00161715	0.00125213	00:00:00	182537	00:00:00	2020-07-26	0	3.3069e+08	2022-04-22
2020-07-27	4.72553e+06	0			0.4	402489	872140	5.67063e+07	69824.9	1.27402		0	2020-07-27	0.171476		0.2	0.0914121	0.0316475	0.00124331	0.00124331	0.215084	0.2	0.828524	0.97144	131800	0.029934	1.27378	0.984771	0.996955	1.05556	0.00124331	0.0016122	0.0012494	00:00:00	184731	00:00:00	2020-07-27	0	3.30695e+08	2022-04-22
2020-07-28	4.79636e+06	0			0.4	409091	888596	5.75563e+07	70831.1	1.27443		0	2020-07-28	0.174044		0.2	0.0923298	0.0322441	0.00124062	0.00124062	0.215337	0.2	0.825956	0.97144	132100	0.0298143	1.27423	0.984771	0.996901	1.05263	0.00124062	0.00160728	0.00124667	00:00:00	186949	00:00:00	2020-07-28	0	3.30701e+08	2022-04-22
2020-07-29	4.86815e+06	0			0.4	415472	904782	5.84178e+07	71790	1.27479		0	2020-07-29	0.176646		0.2	0.0931832	0.0328309	0.00123793	0.00123793	0.215556	0.2	0.823354	0.97144	132400	0.029695	1.27461	0.984771	0.99685	1.0496	0.00123793	0.00160238	0.00124396	00:00:00	189187	00:00:00	2020-07-29	0	3.30706e+08	2022-04-22
2020-07-30	4.94085e+06	0			0.4	421606	920637	5.92902e+07	72697.7	1.2751		0	2020-07-30	0.179281		0.2	0.0939679	0.0334057	0.00123526	0.00123526	0.215747	0.2	0.820719	0.97144	132700	0.0295763	1.27494	0.984771	0.9968	1.0465	0.00123526	0.0015975	0.00124125	00:00:00	191445	00:00:00	2020-07-30	0	3.30711e+08	2022-04-22
2020-07-31	5.0144e+06	0			0.4	427470	936100	6.01728e+07	73550.5	1.27537		0	2020-07-31	0.181947		0.2	0.0946796	0.0339662	0.00123259	0.00123259	0.215912	0.2	0.818053	0.97144	133000	0.029458	1.27523	0.984771	0.996752	1.04332	0.00123259	0.00159264	0.00123856	00:00:00	193720	00:00:00	2020-07-31	0	3.30717e+08	2022-04-22
2020-08-01	5.08874e+06	0			0.4	433039	951111	6.10649e+07	74344.8	1.2756		0	2020-08-01	0.184641		0.2	0.0953145	0.0345103	0.00122993	0.00122993	0.216056	0.2	0.815359	0.97144	133300	0.0293401	1.27548	0.984771	0.996706	1.04007	0.00122993	0.0015878	0.00123587	00:00:00	196010	00:00:00			3.30722e+08	2022-04-22
2020-08-02	5.16382e+06	0			0.4	438292	965613	6.19658e+07	75077.4	1.27581		0	2020-08-02	0.187362		0.2	0.095869	0.0350359	0.00122727	0.00122727	0.216181	0.2	0.812638	0.97144	133600	0.0292228	1.2757	0.984771	0.996663	1.03677	0.00122727	0.00158297	0.00123318	00:00:00	198314	00:00:00			3.30728e+08	2022-04-22
2020-08-03	5.23956e+06	0			0.4	443205	979552	6.28748e+07	75744.9	1.27598		0	2020-08-03	0.190107		0.2	0.0963397	0.0355411	0.00122463	0.00122463	0.21629	0.2	0.809893	0.97144	133900	0.0291059	1.27589	0.984771	0.996622	1.03341	0.00122463	0.00157817	0.00123051	00:00:00	200628	00:00:00			3.30733e+08	2022-04-22
2020-08-04	5.31591e+06	0			0.4	447760	992870	6.37909e+07	76344.5	1.27614		0	2020-08-04	0.192874		0.2	0.0967237	0.0360237	0.00122199	0.00122199	0.216384	0.2	0.807126	0.97144	134200	0.0289895	1.27606	0.984771	0.996584	1.03	0.00122199	0.00157338	0.00122784	00:00:00	202952	00:00:00			3.30739e+08	2022-04-22
2020-08-05	5.39278e+06	0			0.4	451936	1.00551e+06	6.47134e+07	76873.6	1.27627		0	2020-08-05	0.19566		0.2	0.0970183	0.0364819	0.00121936	0.00121936	0.216466	0.2	0.80434	0.97144	134500	0.0288735	1.2762	0.984771	0.996548	1.02655	0.00121936	0.00156862	0.00122518	00:00:00	205283	00:00:00			3.30744e+08	2022-04-22
2020-08-06	5.47011e+06	0			0.4	455715	1.01744e+06	6.56414e+07	77329.8	1.27638		0	2020-08-06	0.198462		0.2	0.0972215	0.0369138	0.00121674	0.00121674	0.216537	0.2	0.801538	0.97144	134800	0.028758	1.27633	0.984771	0.996516	1.02307	0.00121674	0.00156387	0.00122253	00:00:00	207618	00:00:00			3.30749e+08	2022-04-22
2020-08-07	5.54782e+06	0			0.4	459081	1.02858e+06	6.65739e+07	77710.9	1.27649		0	2020-08-07	0.201279		0.2	0.0973312	0.0373176	0.00121412	0.00121412	0.216599	0.2	0.798721	0.97144	135100	0.028643	1.27643	0.984771	0.996487	1.01956	0.00121412	0.00155914	0.00121989	00:00:00	209955	00:00:00			3.30755e+08	2022-04-22
2020-08-08	5.62584e+06	0			0.4	462019	1.03891e+06	6.75101e+07	78015.2	1.27657		0	2020-08-08	0.204106		0.2	0.0973461	0.0376917	0.00121152	0.00121152	0.216652	0.2	0.795894	0.97144	135400	0.0285284	1.27653	0.984771	0.99646	1.01602	0.00121152	0.00155443	0.00121725	00:00:00	212292	00:00:00			3.3076e+08	2022-04-22
2020-08-09	5.70408e+06	0			0.4	464515	1.04838e+06	6.8449e+07	78241.1	1.27665		0	2020-08-09	0.206941		0.2	0.097265	0.0380345	0.00120892	0.00120892	0.216699	0.2	0.793059	0.97144	135700	0.0284143	1.27661	0.984771	0.996438	1.01246	0.00120892	0.00154974	0.00121463	00:00:00	214626	00:00:00			3.30766e+08	2022-04-22
2020-08-10	5.78247e+06	0			0.4	466558	1.05694e+06	6.93896e+07	78387.7	1.27671		0	2020-08-10	0.209781		0.2	0.0970874	0.0383445	0.00120632	0.00120632	0.21674	0.2	0.790219	0.97144	136000	0.0283006	1.27668	0.984771	0.996418	1.00888	0.00120632	0.00154507	0.00121201	00:00:00	216956	00:00:00			3.30771e+08	2022-04-22
2020-08-11	5.86092e+06	0			0.4	468139	1.06456e+06	7.03311e+07	78454	1.27677		0	2020-08-11	0.212624		0.2	0.0968131	0.0386205	0.00120374	0.00120374	0.216775	0.2	0.787376	0.97144	136300	0.0281874	1.27674	0.984771	0.996403	1.0053	0.00120374	0.00154042	0.00120939	00:00:00	219278	00:00:00			3.30777e+08	2022-04-22
2020-08-12	5.93936e+06	0			0.4	469249	1.07121e+06	7.12723e+07	78439.7	1.27682		0	2020-08-12	0.215466		0.2	0.0964422	0.0388611	0.00120116	0.00120116	0.216805	0.2	0.784534	0.97144	136600	0.0280747	1.2768	0.984771	0.99639	1.00171	0.00120116	0.00153578	0.00120679	00:00:00	221590	00:00:00			3.30782e+08	2022-04-22
2020-08-13	6.01771e+06	0			0.4	469882	1.07686e+06	7.22125e+07	78344.5	1.27687		0	2020-08-13	0.218305		0.2	0.0959753	0.0390653	0.00119859	0.00119859	0.216832	0.2	0.781695	0.97144	136900	0.0279624	1.27684	0.984771	0.996382	0.99812	0.00119859	0.00153116	0.00120419	00:00:00	223890	00:00:00			3.30788e+08	2022-04-22
2020-08-14	6.09587e+06	0			0.4	470036	1.08148e+06	7.31505e+07	78168.7	1.2769		0	2020-08-14	0.221137		0.2	0.0954136	0.0392322	0.00119603	0.00119603	0.216855	0.2	0.778863	0.97144	137200	0.0278505	1.27688	0.984771	0.996377	0.994533	0.00119603	0.00152657	0.0012016	00:00:00	226176	00:00:00			3.30793e+08	2022-04-22
2020-08-15	6.17612e+06	0			0.4	472039	1.08738e+06	7.41134e+07	80244.6	1.31515		0	2020-08-15	0.224044		0.3	0.0952288	0.0394455	0.00119347	0.00119347	0.23963	0.3	0.775956	0.97144	137500	0.0277391	1.29603	0.984771	0.996267	1.0205	0.00119347	0.00152198	0.00119902	00:00:00	228513	00:00:00			3.30798e+08	2022-04-22
2020-08-16	6.25699e+06	0			0.4	474522	1.09317e+06	7.50839e+07	80870.8	1.32473		0	2020-08-16	0.226974		0.3	0.0951392	0.039655	0.00119093	0.00119093	0.24513	0.3	0.773026	0.97144	137800	0.0276282	1.31994	0.984771	0.996224	1.02405	0.00119093	0.00151742	0.00119644	00:00:00	230859	00:00:00			3.30804e+08	2022-04-22
2020-08-17	6.33871e+06	0			0.4	477789	1.09915e+06	7.60645e+07	81720.8	1.3367		0	2020-08-17	0.229935		0.3	0.0952037	0.0398712	0.00118839	0.00118839	0.251888	0.3	0.770065	0.97144	138100	0.0275177	1.33071	0.984771	0.99617	1.02934	0.00118839	0.00151288	0.00119388	00:00:00	233221	00:00:00			3.30809e+08	2022-04-22
2020-08-18	6.4216e+06	0			0.4	482234	1.10569e+06	7.70591e+07	82885	1.35165		0	2020-08-18	0.232937		0.3	0.0954977	0.0401078	0.00118585	0.00118585	0.260162	0.3	0.767063	0.97144	138400	0.0274076	1.34417	0.984771	0.996101	1.0368	0.00118585	0.00150835	0.00119132	00:00:00	235606	00:00:00			3.30815e+08	2022-04-22
2020-08-19	6.50549e+06	0			0.4	487782	1.11271e+06	7.80659e+07	83892.4	1.36077		0	2020-08-19	0.235977		0.3	0.0960019	0.0403617	0.00118333	0.00118333	0.265123	0.3	0.764023	0.97144	138700	0.027298	1.35621	0.984771	0.996038	1.03966	0.00118333	0.00150384	0.00118876	00:00:00	238010	00:00:00			3.3082e+08	2022-04-22
2020-08-20	6.59057e+06	0			0.4	494695	1.12046e+06	7.90868e+07	85081	1.36978		0	2020-08-20	0.239059		0.3	0.0967636	0.0406422	0.00118081	0.00118081	0.269956	0.3	0.760941	0.97144	139000	0.0271888	1.36528	0.984771	0.995966	1.04232	0.00118081	0.00149935	0.00118622	00:00:00	240439	00:00:00			3.30826e+08	2022-04-22
2020-08-21	6.67703e+06	0			0.4	500908	1.1292e+06	8.01243e+07	86457.5	1.37805		0	2020-08-21	0.242191		0.3	0.0973767	0.0409588	0.0011783	0.0011783	0.274338	0.3	0.757809	0.97144	139300	0.02708	1.37392	0.984771	0.995884	1.0443	0.0011783	0.00149487	0.00118368	00:00:00	242898	00:00:00			3.30831e+08	2022-04-22
2020-08-22	6.76463e+06	0			0.4	507637	1.13879e+06	8.11755e+07	87600.6	1.38465		0	2020-08-22	0.245365		0.3	0.0980791	0.0413058	0.00117579	0.00117579	0.277797	0.3	0.754635	0.97144	139600	0.0269717	1.38135	0.984771	0.995812	1.04491	0.00117579	0.00149041	0.00118115	00:00:00	245379	00:00:00			3.30836e+08	2022-04-22
2020-08-23	6.85341e+06	0			0.4	514703	1.14933e+06	8.2241e+07	88786.9	1.39062		0	2020-08-23	0.248581		0.3	0.0988341	0.0416876	0.00117329	0.00117329	0.280898	0.3	0.751419	0.97144	139900	0.0268638	1.38764	0.984771	0.995738	1.04494	0.00117329	0.00148597	0.00117862	00:00:00	247883	00:00:00			3.30842e+08	2022-04-22
2020-08-24	6.94339e+06	0			0.4	521793	1.16092e+06	8.33207e+07	89975	1.39583		0	2020-08-24	0.25184		0.3	0.0995812	0.0421072	0.0011708	0.0011708	0.283583	0.3	0.74816	0.97144	140200	0.0267563	1.39323	0.984771	0.995662	1.04431	0.0011708	0.00148155	0.00117611	00:00:00	250411	00:00:00			3.30847e+08	2022-04-22
2020-08-25	7.0345e+06	0			0.4	529009	1.17358e+06	8.4414e+07	91108	1.40028		0	2020-08-25	0.255141		0.3	0.10034	0.0425655	0.00116832	0.00116832	0.285857	0.3	0.744859	0.97144	140500	0.0266493	1.39806	0.984771	0.995589	1.04301	0.00116832	0.00147714	0.0011736	00:00:00	252960	00:00:00			3.30853e+08	2022-04-22
2020-08-26	7.12671e+06	0			0.4	536145	1.18735e+06	8.55206e+07	92217	1.40419		0	2020-08-26	0.258481		0.3	0.101071	0.0430645	0.00116584	0.00116584	0.287844	0.3	0.741519	0.97144	140800	0.0265427	1.40223	0.984771	0.995515	1.04123	0.00116584	0.00147275	0.00117109	00:00:00	255530	00:00:00			3.30858e+08	2022-04-22
2020-08-27	7.21998e+06	0			0.4	542954	1.20227e+06	8.66398e+07	93266.5	1.40758		0	2020-08-27	0.261859		0.3	0.101728	0.043605	0.00116337	0.00116337	0.289559	0.3	0.738141	0.97144	141100	0.0264366	1.40588	0.984771	0.995444	1.03899	0.00116337	0.00146838	0.0011686	00:00:00	258119	00:00:00			3.30864e+08	2022-04-22
2020-08-28	7.3142e+06	0			0.4	549570	1.21832e+06	8.77704e+07	94216.7	1.41051		0	2020-08-28	0.265272		0.3	0.102338	0.0441863	0.00116091	0.00116091	0.291038	0.3	0.734728	0.97144	141400	0.0263308	1.40905	0.984771	0.995377	1.03634	0.00116091	0.00146403	0.00116611	00:00:00	260724	00:00:00			3.30869e+08	2022-04-22
2020-08-29	7.40929e+06	0			0.4	555879	1.23317e+06	8.89115e+07	95096	1.41307		0	2020-08-29	0.268717		0.3	0.102881	0.0447242	0.00115846	0.00115846	0.292322	0.3	0.731283	0.97144	141700	0.0262255	1.41179	0.984771	0.995312	1.03336	0.00115846	0.00145969	0.00116363	00:00:00	263343	00:00:00			3.30875e+08	2022-04-22
2020-08-30	7.50518e+06	0			0.4	561791	1.24819e+06	9.00622e+07	95887.3	1.41529		0	2020-08-30	0.27219		0.3	0.10334	0.045268	0.00115601	0.00115601	0.293432	0.3	0.72781	0.97144	142000	0.0261206	1.41418	0.984771	0.995251	1.03006	0.00115601	0.00145537	0.00116116	00:00:00	265972	00:00:00			3.3088e+08	2022-04-22
2020-08-31	7.60176e+06	0			0.4	567262	1.26305e+06	9.12211e+07	96578.3	1.41722		0	2020-08-31	0.275688		0.3	0.10371	0.0458061	0.00115357	0.00115357	0.294394	0.3	0.724312	0.97144	142300	0.0260161	1.41626	0.984771	0.995194	1.02651	0.00115357	0.00145106	0.00115869	00:00:00	268611	00:00:00			3.30885e+08	2022-04-22
2020-09-01	7.69892e+06	0			0.4	572210	1.27733e+06	9.23871e+07	97164.9	1.4189		0	2020-09-01	0.279207		0.3	0.103977	0.0463232	0.00115113	0.00115113	0.295228	0.3	0.720793	0.97144	142600	0.025912	1.41806	0.984771	0.995141	1.02273	0.00115113	0.00144677	0.00115623	00:00:00	271254	00:00:00			3.30891e+08	2022-04-22
2020-09-02	7.79656e+06	0			0.4	576579	1.29107e+06	9.35587e+07	97636.3	1.42036		0	2020-09-02	0.282743		0.3	0.104133	0.0468209	0.0011487	0.0011487	0.295951	0.3	0.717257	0.97144	142900	0.0258084	1.41963	0.984771	0.995094	1.01876	0.0011487	0.0014425	0.00115377	00:00:00	273900	00:00:00			3.30896e+08	2022-04-22
2020-09-03	7.89455e+06	0			0.4	580349	1.30398e+06	9.47346e+07	97986.5	1.42162		0	2020-09-03	0.286292		0.3	0.104176	0.0472881	0.00114628	0.00114628	0.296577	0.3	0.713708	0.97144	143200	0.0257052	1.42099	0.984771	0.995052	1.01462	0.00114628	0.00143824	0.00115133	00:00:00	276545	00:00:00			3.30902e+08	2022-04-22
2020-09-04	7.99276e+06	0			0.4	583468	1.31574e+06	9.59131e+07	98215.1	1.42272		0	2020-09-04	0.289849		0.3	0.104099	0.0477137	0.00114387	0.00114387	0.297121	0.3	0.710151	0.97144	143500	0.0256023	1.42217	0.984771	0.995016	1.01035	0.00114387	0.001434	0.00114889	00:00:00	279185	00:00:00			3.30907e+08	2022-04-22
2020-09-05	8.09108e+06	0			0.4	585898	1.32645e+06	9.70929e+07	98316.8	1.42368		0	2020-09-05	0.29341		0.3	0.103897	0.0481016	0.00114146	0.00114146	0.297593	0.3	0.70659	0.97144	143800	0.0254999	1.4232	0.984771	0.994986	1.00596	0.00114146	0.00142978	0.00114646	00:00:00	281817	00:00:00			3.30913e+08	2022-04-22
2020-09-06	8.18937e+06	0			0.4	587608	1.33595e+06	9.82724e+07	98288.5	1.42451		0	2020-09-06	0.296969		0.3	0.103567	0.0484453	0.00113906	0.00113906	0.298002	0.3	0.703031	0.97144	144100	0.0253979	1.42409	0.984771	0.994963	1.00147	0.00113906	0.00142557	0.00114403	00:00:00	284439	00:00:00			3.30918e+08	2022-04-22
2020-09-07	8.2875e+06	0			0.4	588572	1.34411e+06	9.94499e+07	98128.5	1.42523		0	2020-09-07	0.300522		0.3	0.103107	0.0487402	0.00113667	0.00113667	0.298358	0.3	0.699478	0.97144	144400	0.0252963	1.42487	0.984771	0.994945	0.996915	0.00113667	0.00142138	0.00114161	00:00:00	287045	00:00:00			3.30923e+08	2022-04-22
2020-09-08	8.38533e+06	0			0.4	588771	1.35083e+06	1.00624e+08	97835.7	1.42585		0	2020-09-08	0.304065		0.3	0.102517	0.0489834	0.00113428	0.00113428	0.298666	0.3	0.695935	0.97144	144700	0.0251951	1.42554	0.984771	0.994935	0.992302	0.00113428	0.0014172	0.0011392	00:00:00	289633	00:00:00			3.30929e+08	2022-04-22
2020-09-09	8.48274e+06	0			0.4	588195	1.35603e+06	1.01793e+08	97410.3	1.4264		0	2020-09-09	0.307592		0.3	0.101796	0.0491709	0.0011319	0.0011319	0.298934	0.3	0.692408	0.97144	145000	0.0250944	1.42613	0.984771	0.994932	0.98765	0.0011319	0.00141304	0.00113679	00:00:00	292200	00:00:00			3.30934e+08	2022-04-22
2020-09-10	8.5796e+06	0			0.4	586834	1.35961e+06	1.02955e+08	96853.9	1.42687		0	2020-09-10	0.311099		0.3	0.100945	0.0493001	0.00112952	0.00112952	0.299167	0.3	0.688901	0.97144	145300	0.024994	1.42664	0.984771	0.994935	0.982973	0.00112952	0.0014089	0.0011344	00:00:00	294742	00:00:00			3.3094e+08	2022-04-22
2020-09-11	8.67576e+06	0			0.4	584685	1.36157e+06	1.04109e+08	96168	1.42728		0	2020-09-11	0.314581		0.3	0.0999667	0.0493701	0.00112716	0.00112716	0.299368	0.3	0.685419	0.97144	145600	0.024894	1.42708	0.984771	0.994946	0.978287	0.00112716	0.00140477	0.001132	00:00:00	297255	00:00:00			3.30945e+08	2022-04-22
2020-09-12	8.77112e+06	0			0.4	581752	1.36183e+06	1.05253e+08	95355.5	1.42764		0	2020-09-12	0.318034		0.3	0.0988637	0.0493787	0.0011248	0.0011248	0.299544	0.3	0.681966	0.97144	145900	0.0247944	1.42746	0.984771	0.994963	0.973603	0.0011248	0.00140065	0.00112962	00:00:00	299738	00:00:00			3.30951e+08	2022-04-22
2020-09-13	8.86554e+06	0			0.4	578043	1.36036e+06	1.06386e+08	94419.8	1.42795		0	2020-09-13	0.321452		0.3	0.0976397	0.0493247	0.00112244	0.00112244	0.299696	0.3	0.678548	0.97144	146200	0.0246953	1.4278	0.984771	0.994988	0.968934	0.00112244	0.00139656	0.00112724	00:00:00	302186	00:00:00			3.30956e+08	2022-04-22
2020-09-14	8.9589e+06	0			0.4	573573	1.35715e+06	1.07507e+08	93365.2	1.42822		0	2020-09-14	0.324832		0.3	0.0962994	0.0492073	0.00112009	0.00112009	0.299828	0.3	0.675168	0.97144	146500	0.0245965	1.42809	0.984771	0.995019	0.964289	0.00112009	0.00139247	0.00112487	00:00:00	304598	00:00:00			3.30962e+08	2022-04-22
2020-09-15	9.0511e+06	0			0.4	568359	1.35218e+06	1.08613e+08	92196.8	1.42846		0	2020-09-15	0.328169		0.3	0.0948482	0.0490264	0.00111775	0.00111775	0.299943	0.3	0.671831	0.97144	146800	0.0244981	1.42834	0.984771	0.995057	0.95968	0.00111775	0.0013884	0.0011225	00:00:00	306969	00:00:00			3.30967e+08	2022-04-22
2020-09-16	9.14202e+06	0			0.4	562425	1.34546e+06	1.09704e+08	90920.1	1.42866		0	2020-09-16	0.33146		0.3	0.0932919	0.0487821	0.00111542	0.00111542	0.300043	0.3	0.66854	0.97144	147100	0.0244001	1.42856	0.984771	0.995101	0.955115	0.00111542	0.00138435	0.00112014	00:00:00	309298	00:00:00			3.30972e+08	2022-04-22
2020-09-17	9.23156e+06	0			0.4	555799	1.33702e+06	1.10779e+08	89541.3	1.42884		0	2020-09-17	0.334701		0.3	0.091637	0.0484751	0.00111309	0.00111309	0.30013	0.3	0.665299	0.97144	147400	0.0243025	1.42875	0.984771	0.995152	0.950603	0.00111309	0.00138032	0.00111779	00:00:00	311583	00:00:00			3.30978e+08	2022-04-22
2020-09-18	9.31963e+06	0			0.4	548510	1.32687e+06	1.11836e+08	88066.7	1.42899		0	2020-09-18	0.337889		0.3	0.0902516	0.0481064	0.00111077	0.00111077	0.300205	0.3	0.662111	0.97144	147700	0.0243025	1.42891	0.984771	0.995209	0.94615	0.00111077	0.00137629	0.00111545	00:00:00	313831	00:00:00			3.30983e+08	2022-04-22
2020-09-19	9.40613e+06	0			0.4	540594	1.31505e+06	1.12874e+08	86503.5	1.42912		0	2020-09-19	0.341019		0.3	0.0887688	0.0476773	0.00110845	0.00110845	0.30027	0.3	0.658981	0.97144	148000	0.0243025	1.42906	0.984771	0.995272	0.941764	0.00110845	0.00137229	0.00111311	00:00:00	316038	00:00:00			3.30989e+08	2022-04-22
2020-09-20	9.49099e+06	0			0.4	532087	1.30162e+06	1.13892e+08	84858.9	1.42924		0	2020-09-20	0.34409		0.3	0.0871952	0.0471896	0.00110614	0.00110614	0.300327	0.3	0.65591	0.97144	148300	0.0243025	1.42918	0.984771	0.99534	0.937452	0.00110614	0.00136829	0.00111077	00:00:00	318203	00:00:00			3.30994e+08	2022-04-22
2020-09-21	9.57413e+06	0			0.4	523031	1.28664e+06	1.1489e+08	83140.2	1.42934		0	2020-09-21	0.347099		0.3	0.0855381	0.0466455	0.00110384	0.00110384	0.300376	0.3	0.652901	0.97144	148600	0.0243025	1.42929	0.984771	0.995413	0.933218	0.00110384	0.00136432	0.00110845	00:00:00	320325	00:00:00			3.31e+08	2022-04-22
2020-09-22	9.65549e+06	0			0.4	513466	1.27016e+06	1.15866e+08	81355.3	1.42943		0	2020-09-22	0.350042		0.3	0.0838046	0.0460472	0.00110154	0.00110154	0.300419	0.3	0.649958	0.97144	148900	0.0243025	1.42938	0.984771	0.995491	0.929067	0.00110154	0.00136035	0.00110613	00:00:00	322401	00:00:00			3.31005e+08	2022-04-22
2020-09-23	9.735e+06	0			0.4	503436	1.25226e+06	1.1682e+08	79511.6	1.4295		0	2020-09-23	0.352919		0.3	0.0820024	0.0453976	0.00109925	0.00109925	0.300457	0.3	0.647081	0.97144	149200	0.0243025	1.42947	0.984771	0.995574	0.925004	0.00109925	0.00135641	0.00110381	00:00:00	324430	00:00:00			3.31011e+08	2022-04-22
2020-09-24	9.81262e+06	0			0.4	492987	1.23302e+06	1.17751e+08	77617.1	1.42957		0	2020-09-24	0.355727		0.3	0.0801392	0.0446995	0.00109697	0.00109697	0.300489	0.3	0.644273	0.97144	149500	0.0243025	1.42954	0.984771	0.995661	0.921033	0.00109697	0.00135247	0.00110151	00:00:00	326410	00:00:00			3.31016e+08	2022-04-22
2020-09-25	9.88829e+06	0			0.4	482162	1.21253e+06	1.1866e+08	75679.2	1.42963		0	2020-09-25	0.358465		0.3	0.0782226	0.043956	0.00109469	0.00109469	0.300517	0.3	0.641535	0.97144	149800	0.0243025	1.4296	0.984771	0.995751	0.917156	0.00109469	0.00134855	0.00109921	00:00:00	328342	00:00:00			3.31021e+08	2022-04-22
2020-09-26	9.962e+06	0			0.4	471009	1.19088e+06	1.19544e+08	73705.6	1.42968		0	2020-09-26	0.361131		0.3	0.0762605	0.0431704	0.00109242	0.00109242	0.300541	0.3	0.638869	0.97144	150100	0.0243025	1.42965	0.984771	0.995844	0.913377	0.00109242	0.00134465	0.00109691	00:00:00	330222	00:00:00			3.31027e+08	2022-04-22
2020-09-27	1.00337e+07	0			0.4	459572	1.16817e+06	1.20404e+08	71703.6	1.42972		0	2020-09-27	0.363724		0.3	0.0742604	0.0423463	0.00109015	0.00109015	0.300563	0.3	0.636276	0.97144	150400	0.0243025	1.4297	0.984771	0.995941	0.909697	0.00109015	0.00134076	0.00109462	00:00:00	332052	00:00:00			3.31032e+08	2022-04-22
2020-09-28	1.01034e+07	0			0.4	447898	1.14448e+06	1.21241e+08	69680.4	1.42976		0	2020-09-28	0.366244		0.3	0.0722298	0.041487	0.00108789	0.00108789	0.300581	0.3	0.633756	0.97144	150700	0.0243025	1.42974	0.984771	0.99604	0.906118	0.00108789	0.00133688	0.00109234	00:00:00	333830	00:00:00			3.31038e+08	2022-04-22
2020-09-29	1.0171e+07	0			0.4	436029	1.11993e+06	1.22052e+08	67642.9	1.42979		0	2020-09-29	0.36869		0.3	0.0701761	0.0405963	0.00108564	0.00108564	0.300597	0.3	0.63131	0.97144	151000	0.0243025	1.42977	0.984771	0.996141	0.902641	0.00108564	0.00133302	0.00109007	00:00:00	335556	00:00:00			3.31043e+08	2022-04-22
2020-09-30	1.02366e+07	0			0.4	424009	1.0946e+06	1.22839e+08	65597.6	1.42982		0	2020-09-30	0.371062		0.3	0.0681063	0.0396777	0.00108339	0.00108339	0.300611	0.3	0.628938	0.97144	151300	0.0243025	1.42981	0.984771	0.996243	0.899268	0.00108339	0.00132917	0.0010878	00:00:00	337230	00:00:00			3.31049e+08	2022-04-22
2020-10-01	1.03002e+07	0			0.4	411881	1.06861e+06	1.23602e+08	63550.8	1.42984		0	2020-10-01	0.373359		0.3	0.0660273	0.0387349	0.00108115	0.00108115	0.300623	0.3	0.626641	0.97144	151600	0.0243025	1.42983	0.984771	0.996347	0.895999	0.00108115	0.00132534	0.00108553	00:00:00	338852	00:00:00			3.31054e+08	2022-04-22
2020-10-02	1.03617e+07	0			0.4	399684	1.04206e+06	1.2434e+08	61508.4	1.42987		0	2020-10-02	0.375583		0.3	0.0639454	0.0377716	0.00107892	0.00107892	0.300634	0.3	0.624417	0.97144	151900	0.0243025	1.42986	0.984771	0.996452	0.892833	0.00107892	0.00132152	0.00108328	00:00:00	340421	00:00:00			3.31059e+08	2022-04-22
2020-10-03	1.04212e+07	0			0.4	387456	1.01503e+06	1.25054e+08	59475.9	1.42988		0	2020-10-03	0.377732		0.3	0.0618669	0.0367914	0.00107669	0.00107669	0.300643	0.3	0.622268	0.97144	152200	0.0243025	1.42988	0.984771	0.996557	0.889771	0.00107669	0.00131772	0.00108103	00:00:00	341939	00:00:00			3.31065e+08	2022-04-22
2020-10-04	1.04786e+07	0			0.4	375234	987627	1.25743e+08	57458.5	1.4299		0	2020-10-04	0.379809		0.3	0.0597975	0.0357976	0.00107447	0.00107447	0.300651	0.3	0.620191	0.97144	152500	0.0243025	1.42989	0.984771	0.996663	0.886812	0.00107447	0.00131393	0.00107878	00:00:00	343405	00:00:00			3.3107e+08	2022-04-22
2020-10-05	1.05341e+07	0			0.4	363052	959948	1.26409e+08	55460.9	1.42991		0	2020-10-05	0.381813		0.3	0.0577426	0.0347938	0.00107225	0.00107225	0.300658	0.3	0.618187	0.97144	152800	0.0243025	1.42991	0.984771	0.996769	0.883955	0.00107225	0.00131015	0.00107654	00:00:00	344820	00:00:00			3.31076e+08	2022-04-22
2020-10-06	1.05876e+07	0			0.4	350942	932080	1.27051e+08	53487.4	1.42993		0	2020-10-06	0.383745		0.3	0.0557071	0.0337831	0.00107004	0.00107004	0.300664	0.3	0.616255	0.97144	153100	0.0243025	1.42992	0.984771	0.996874	0.8812	0.00107004	0.00130638	0.00107431	00:00:00	346185	00:00:00			3.31081e+08	2022-04-22
2020-10-07	1.06391e+07	0			0.4	338933	904110	1.27669e+08	51542	1.42994		0	2020-10-07	0.385607		0.3	0.0536957	0.0327688	0.00106784	0.00106784	0.300669	0.3	0.614393	0.97144	153400	0.0243025	1.42993	0.984771	0.996979	0.878544	0.00106784	0.00130263	0.00107208	00:00:00	347501	00:00:00			3.31087e+08	2022-04-22
2020-10-08	1.06887e+07	0			0.4	327053	876121	1.28265e+08	49628.3	1.42995		0	2020-10-08	0.387399		0.3	0.0517125	0.0317539	0.00106564	0.00106564	0.300673	0.3	0.612601	0.97144	153700	0.0243025	1.42994	0.984771	0.997083	0.875987	0.00106564	0.0012989	0.00106986	00:00:00	348767	00:00:00			3.31092e+08	2022-04-22
2020-10-09	1.07365e+07	0			0.4	315326	848192	1.28838e+08	47749.3	1.42996		0	2020-10-09	0.389123		0.3	0.0497612	0.0307411	0.00106344	0.00106344	0.300677	0.3	0.610877	0.97144	154000	0.0243025	1.42995	0.984771	0.997185	0.873526	0.00106344	0.00129518	0.00106765	00:00:00	349985	00:00:00			3.31098e+08	2022-04-22
2020-10-10	1.07824e+07	0			0.4	303776	820394	1.29389e+08	45907.9	1.42996		0	2020-10-10	0.390781		0.3	0.0478452	0.0297331	0.00106126	0.00106126	0.300681	0.3	0.609219	0.97144	154300	0.0243025	1.42996	0.984771	0.997287	0.87116	0.00106126	0.00129147	0.00106544	00:00:00	351157	00:00:00			3.31103e+08	2022-04-22
2020-10-11	1.08265e+07	0			0.4	292421	792797	1.29918e+08	44106.4	1.42997		0	2020-10-11	0.392373		0.3	0.0459674	0.0287325	0.00105908	0.00105908	0.300684	0.3	0.607627	0.97144	154600	0.0243025	1.42997	0.984771	0.997387	0.868887	0.00105908	0.00128777	0.00106324	00:00:00	352282	00:00:00			3.31108e+08	2022-04-22
2020-10-12	1.08688e+07	0			0.4	281281	765463	1.30426e+08	42347	1.42997		0	2020-10-12	0.393901		0.3	0.0441306	0.0277414	0.0010569	0.0010569	0.300686	0.3	0.606099	0.97144	154900	0.0243025	1.42997	0.984771	0.997485	0.866705	0.0010569	0.00128409	0.00106104	00:00:00	353363	00:00:00			3.31114e+08	2022-04-22
2020-10-13	1.09095e+07	0			0.4	270370	738452	1.30914e+08	40631.4	1.42998		0	2020-10-13	0.395367		0.3	0.0423368	0.026762	0.00105473	0.00105473	0.300688	0.3	0.604633	0.97144	155200	0.0243025	1.42998	0.984771	0.997581	0.864612	0.00105473	0.00128042	0.00105885	00:00:00	354400	00:00:00			3.31119e+08	2022-04-22
2020-10-14	1.09484e+07	0			0.4	259703	711815	1.31381e+08	38961	1.42998		0	2020-10-14	0.396773		0.3	0.040588	0.0257963	0.00105257	0.00105257	0.30069	0.3	0.603227	0.97144	155500	0.0243025	1.42998	0.984771	0.997676	0.862604	0.00105257	0.00127676	0.00105667	00:00:00	355394	00:00:00			3.31125e+08	2022-04-22
2020-10-15	1.09858e+07	0			0.4	249291	685601	1.31829e+08	37336.9	1.42999		0	2020-10-15	0.398119		0.3	0.0388856	0.0248459	0.00105041	0.00105041	0.300692	0.3	0.601881	0.97144	155800	0.0243025	1.42998	0.984771	0.997768	0.860681	0.00105041	0.00127312	0.00105449	00:00:00	356347	00:00:00			3.3113e+08	2022-04-22
2020-10-16	1.10215e+07	0			0.4	239143	659853	1.32258e+08	35760	1.42999		0	2020-10-16	0.399409		0.3	0.037231	0.0239124	0.00104826	0.00104826	0.300694	0.3	0.600591	0.97144	156100	0.0243025	1.42999	0.984771	0.997858	0.858839	0.00104826	0.00126949	0.00105232	00:00:00	357259	00:00:00			3.31136e+08	2022-04-22
2020-10-17	1.10558e+07	0			0.4	229267	634608	1.32669e+08	34230.9	1.42999		0	2020-10-17	0.400642		0.3	0.0356251	0.0229971	0.00104611	0.00104611	0.300695	0.3	0.599358	0.97144	156400	0.0243025	1.42999	0.984771	0.997946	0.857076	0.00104611	0.00126587	0.00105015	00:00:00	358133	00:00:00			3.31141e+08	2022-04-22
2020-10-18	1.10885e+07	0			0.4	219670	609899	1.33062e+08	32749.9	1.42999		0	2020-10-18	0.401823		0.3	0.0340685	0.0221014	0.00104397	0.00104397	0.300696	0.3	0.598177	0.97144	156700	0.0243025	1.42999	0.984771	0.998031	0.855389	0.00104397	0.00126227	0.00104799	00:00:00	358968	00:00:00			3.31147e+08	2022-04-22
2020-10-19	1.11198e+07	0			0.4	210356	585756	1.33438e+08	31317.3	1.43		0	2020-10-19	0.402951		0.3	0.0325616	0.0212261	0.00104184	0.00104184	0.300697	0.3	0.597049	0.97144	157000	0.0243025	1.42999	0.984771	0.998114	0.853777	0.00104184	0.00125868	0.00104583	00:00:00	359768	00:00:00			3.31152e+08	2022-04-22
2020-10-20	1.11498e+07	0			0.4	201328	562201	1.33797e+08	29932.9	1.43		0	2020-10-20	0.404029		0.3	0.0311047	0.0203722	0.00103971	0.00103971	0.300698	0.3	0.595971	0.97144	157300	0.0243025	1.43	0.984771	0.998194	0.852237	0.00103971	0.0012551	0.00104368	00:00:00	360531	00:00:00			3.31157e+08	2022-04-22
2020-10-21	1.11784e+07	0			0.4	192588	539256	1.3414e+08	28596.5	1.43		0	2020-10-21	0.405059		0.3	0.0296977	0.0195404	0.00103759	0.00103759	0.300699	0.3	0.594941	0.97144	157600	0.0243025	1.43	0.984771	0.998272	0.850765	0.00103759	0.00125153	0.00104154	00:00:00	361261	00:00:00			3.31163e+08	2022-04-22
2020-10-22	1.12057e+07	0			0.4	184135	516935	1.34468e+08	27307.8	1.43		0	2020-10-22	0.406041		0.3	0.0283404	0.0187313	0.00103547	0.00103547	0.300699	0.3	0.593959	0.97144	157900	0.0243025	1.43	0.984771	0.998348	0.849361	0.00103547	0.00124798	0.0010394	00:00:00	361958	00:00:00			3.31168e+08	2022-04-22
2020-10-23	1.12317e+07	0			0.4	175971	495252	1.34781e+08	26066.2	1.43		0	2020-10-23	0.406979		0.3	0.0270324	0.0179453	0.00103336	0.00103336	0.3007	0.3	0.593021	0.97144	158200	0.0243025	1.43	0.984771	0.998421	0.84802	0.00103336	0.00124444	0.00103727	00:00:00	362623	00:00:00			3.31174e+08	2022-04-22
2020-10-24	1.12566e+07	0			0.4	168092	474215	1.35079e+08	24871.1	1.43		0	2020-10-24	0.407874		0.3	0.0257732	0.0171828	0.00103125	0.00103125	0.3007	0.3	0.592126	0.97144	158500	0.0243025	1.43	0.984771	0.998492	0.846742	0.00103125	0.00124091	0.00103514	00:00:00	363258	00:00:00			3.31179e+08	2022-04-22
2020-10-25	1.12803e+07	0			0.4	160496	453831	1.35364e+08	23721.8	1.43		0	2020-10-25	0.408727		0.3	0.0245621	0.0164439	0.00102915	0.00102915	0.300701	0.3	0.591273	0.97144	158800	0.0243025	1.43	0.984771	0.99856	0.845523	0.00102915	0.0012374	0.00103302	00:00:00	363863	00:00:00			3.31185e+08	2022-04-22
2020-10-26	1.13029e+07	0			0.4	153181	434101	1.35635e+08	22617.2	1.43		0	2020-10-26	0.409539		0.3	0.0233983	0.0157288	0.00102705	0.00102705	0.300701	0.3	0.590461	0.97144	159100	0.0243025	1.43	0.984771	0.998625	0.844361	0.00102705	0.0012339	0.0010309	00:00:00	364440	00:00:00			3.3119e+08	2022-04-22
2020-10-27	1.13245e+07	0			0.4	146141	415026	1.35894e+08	21556.6	1.43		0	2020-10-27	0.410314		0.3	0.022281	0.0150374	0.00102496	0.00102496	0.300701	0.3	0.589686	0.97144	159400	0.0243025	1.43	0.984771	0.998689	0.843254	0.00102496	0.00123041	0.00102879	00:00:00	364990	00:00:00			3.31196e+08	2022-04-22
2020-10-28	1.1345e+07	0			0.4	139372	396604	1.36141e+08	20539	1.43		0	2020-10-28	0.411051		0.3	0.0212091	0.0143697	0.00102288	0.00102288	0.300702	0.3	0.588949	0.97144	159700	0.0243025	1.43	0.984771	0.998749	0.8422	0.00102288	0.00122693	0.00102669	00:00:00	365514	00:00:00			3.31201e+08	2022-04-22
2020-10-29	1.13646e+07	0			0.4	132869	378831	1.36375e+08	19563.2	1.43001		0	2020-10-29	0.411753		0.3	0.0201815	0.0137255	0.0010208	0.0010208	0.300702	0.3	0.588247	0.97144	160000	0.0243025	1.43	0.984771	0.998808	0.841196	0.0010208	0.00122347	0.00102459	00:00:00	366014	00:00:00			3.31206e+08	2022-04-22
2020-10-30	1.13832e+07	0			0.4	126626	361699	1.36599e+08	18628.1	1.43001		0	2020-10-30	0.412421		0.3	0.0191973	0.0131046	0.00101873	0.00101873	0.300702	0.3	0.587579	0.97144	160300	0.0243025	1.43001	0.984771	0.998864	0.840241	0.00101873	0.00122001	0.0010225	00:00:00	366489	00:00:00			3.31212e+08	2022-04-22
2020-10-31	1.1401e+07	0			0.4	120637	345200	1.36812e+08	17732.7	1.43001		0	2020-10-31	0.413057		0.3	0.0182552	0.0125066	0.00101666	0.00101666	0.300702	0.3	0.586943	0.97144	160600	0.0243025	1.43001	0.984771	0.998918	0.839332	0.00101666	0.00121657	0.00102041	00:00:00	366941	00:00:00			3.31217e+08	2022-04-22
2020-11-01	1.14196e+07	0			0.4	116699	331130	1.37036e+08	18679.6	1.58286		0	2020-11-01	0.413727		0.7	0.0176264	0.0119966	0.0010146	0.0010146	0.368233	0.7	0.586273	0.97144	160900	0.0243025	1.50643	0.984771	0.998859	0.92799	0.0010146	0.00121314	0.00101833	00:00:00	367418	00:00:00			3.31223e+08	2022-04-22
2020-11-02	1.14381e+07	0			0.4	113628	318298	1.37258e+08	18485	1.62108		0	2020-11-02	0.41439		0.7	0.0171305	0.0115315	0.00101254	0.00101254	0.383126	0.7	0.58561	0.97144	161200	0.0243025	1.60197	0.984771	0.998869	0.949319	0.00101254	0.00120973	0.00101625	00:00:00	367890	00:00:00			3.31228e+08	2022-04-22
2020-11-03	1.14566e+07	0			0.4	111597	306873	1.3748e+08	18507.9	1.66884		0	2020-11-03	0.415053		0.7	0.016793	0.0111175	0.00101049	0.00101049	0.400783	0.7	0.584947	0.97144	161500	0.0243025	1.64496	0.984771	0.998867	0.976185	0.00101049	0.00120632	0.00101418	00:00:00	368362	00:00:00			3.31234e+08	2022-04-22
2020-11-04	1.14754e+07	0			0.4	110840	297082	1.37705e+08	18806.1	1.72855		0	2020-11-04	0.415728		0.7	0.0166482	0.0107626	0.00100844	0.00100844	0.421482	0.7	0.584272	0.97144	161800	0.0243025	1.6987	0.984771	0.998847	1.00995	0.00100844	0.00120293	0.00101212	00:00:00	368842	00:00:00			3.31239e+08	2022-04-22
2020-11-05	1.14945e+07	0			0.4	111261	288825	1.37934e+08	19050.1	1.76498		0	2020-11-05	0.416411		0.7	0.0166806	0.0104633	0.0010064	0.0010064	0.43342	0.7	0.583589	0.97144	162100	0.0243025	1.74677	0.984771	0.998831	1.03002	0.0010064	0.00119955	0.00101006	00:00:00	369328	00:00:00			3.31245e+08	2022-04-22
2020-11-06	1.1514e+07	0			0.4	113018	282248	1.38168e+08	19489.6	1.80095		0	2020-11-06	0.41711		0.7	0.0169127	0.0102248	0.00100437	0.00100437	0.444738	0.7	0.58289	0.97144	162400	0.0243025	1.78296	0.984771	0.998802	1.04976	0.00100437	0.00119618	0.001008	00:00:00	369825	00:00:00			3.3125e+08	2022-04-22
2020-11-07	1.15341e+07	0			0.4	114475	277513	1.38409e+08	20136.2	1.83398		0	2020-11-07	0.417833		0.7	0.0170991	0.0100531	0.00100234	0.00100234	0.454737	0.7	0.582167	0.97144	162700	0.0243025	1.81747	0.984771	0.99876	1.06768	0.00100234	0.00119282	0.00100595	00:00:00	370339	00:00:00			3.31255e+08	2022-04-22
2020-11-08	1.15548e+07	0			0.4	116653	274455	1.38657e+08	20663.2	1.86033		0	2020-11-08	0.418575		0.7	0.0173924	0.00994218	0.00100031	0.00100031	0.462462	0.7	0.581425	0.97144	163000	0.0243025	1.84716	0.984771	0.998726	1.08165	0.00100031	0.00118948	0.00100391	00:00:00	370866	00:00:00			3.31261e+08	2022-04-22
2020-11-09	1.15761e+07	0			0.4	119444	273137	1.38913e+08	21299	1.88417		0	2020-11-09	0.419339		0.7	0.0177758	0.00989427	0.000998294	0.000998294	0.469264	0.7	0.580661	0.97144	163300	0.0243025	1.87225	0.984771	0.998685	1.09407	0.000998294	0.00118614	0.00100187	00:00:00	371410	00:00:00			3.31266e+08	2022-04-22
2020-11-10	1.15981e+07	0			0.4	122659	273600	1.39177e+08	22020.5	1.90498		0	2020-11-10	0.42013		0.7	0.0182207	0.00991091	0.00099628	0.00099628	0.47506	0.7	0.57987	0.97144	163600	0.0243025	1.89458	0.984771	0.998638	1.10464	0.00099628	0.00118282	0.000999837	00:00:00	371972	00:00:00			3.31272e+08	2022-04-22
2020-11-11	1.16209e+07	0			0.4	126401	275854	1.39451e+08	22792.7	1.92273		0	2020-11-11	0.420949		0.7	0.0187423	0.00999238	0.000994271	0.000994271	0.479906	0.7	0.579051	0.97144	163900	0.0243025	1.91386	0.984771	0.998588	1.11336	0.000994271	0.00117951	0.000997809	00:00:00	372554	00:00:00			3.31277e+08	2022-04-22
2020-11-12	1.16445e+07	0			0.4	130557	279936	1.39735e+08	23645.3	1.93833		0	2020-11-12	0.421798		0.7	0.0193231	0.0101401	0.000992267	0.000992267	0.484092	0.7	0.578202	0.97144	164200	0.0243025	1.93053	0.984771	0.998533	1.12074	0.000992267	0.00117621	0.000995787	00:00:00	373157	00:00:00			3.31283e+08	2022-04-22
2020-11-13	1.16691e+07	0			0.4	134978	285865	1.40029e+08	24557.2	1.95187		0	2020-11-13	0.422681		0.7	0.019941	0.0103547	0.000990269	0.000990269	0.48767	0.7	0.577319	0.97144	164500	0.0243025	1.9451	0.984771	0.998474	1.12685	0.000990269	0.00117292	0.00099377	00:00:00	373784	00:00:00			3.31288e+08	2022-04-22
2020-11-14	1.16946e+07	0			0.4	139817	293635	1.40335e+08	25502.2	1.96359		0	2020-11-14	0.423598		0.7	0.0206183	0.0106359	0.000988276	0.000988276	0.490729	0.7	0.576402	0.97144	164800	0.0243025	1.95773	0.984771	0.998412	1.13182	0.000988276	0.00116965	0.000991758	00:00:00	374434	00:00:00			3.31294e+08	2022-04-22
2020-11-15	1.17211e+07	0			0.4	145030	301467	1.40653e+08	26511.7	1.9738		0	2020-11-15	0.424551		0.7	0.0213482	0.0109194	0.000986287	0.000986287	0.493364	0.7	0.575449	0.97144	165100	0.0243025	1.9687	0.984771	0.998346	1.13582	0.000986287	0.00116638	0.000989751	00:00:00	375111	00:00:00			3.31299e+08	2022-04-22
2020-11-16	1.17487e+07	0			0.4	150587	310560	1.40984e+08	27578	1.98267		0	2020-11-16	0.425543		0.7	0.022126	0.0112486	0.000984305	0.000984305	0.495631	0.7	0.574457	0.97144	165400	0.0243025	1.97824	0.984771	0.998276	1.13896	0.000984305	0.00116313	0.00098775	00:00:00	375815	00:00:00			3.31304e+08	2022-04-22
2020-11-17	1.17774e+07	0			0.4	156491	320749	1.41329e+08	28696.5	1.99038		0	2020-11-17	0.426575		0.7	0.0229519	0.0116175	0.000982327	0.000982327	0.497582	0.7	0.573425	0.97144	165700	0.0243025	1.98652	0.984771	0.998203	1.14133	0.000982327	0.00115989	0.000985753	00:00:00	376547	00:00:00			3.3131e+08	2022-04-22
2020-11-18	1.18073e+07	0			0.4	162714	331811	1.41687e+08	29868.1	1.99707		0	2020-11-18	0.42765		0.7	0.0238214	0.0120179	0.000980354	0.000980354	0.499267	0.7	0.57235	0.97144	166000	0.0243025	1.99372	0.984771	0.998126	1.14302	0.000980354	0.00115666	0.000983762	00:00:00	377309	00:00:00			3.31315e+08	2022-04-22
2020-11-19	1.18383e+07	0			0.4	169245	343848	1.4206e+08	31087.9	2.00289		0	2020-11-19	0.428769		0.7	0.0247328	0.0124537	0.000978387	0.000978387	0.500721	0.7	0.571231	0.97144	166300	0.0243025	1.99998	0.984771	0.998045	1.14411	0.000978387	0.00115344	0.000981776	00:00:00	378102	00:00:00			3.31321e+08	2022-04-22
2020-11-20	1.18707e+07	0			0.4	176096	356713	1.42448e+08	32353.9	2.00794		0	2020-11-20	0.429934		0.7	0.0256877	0.0129194	0.000976424	0.000976424	0.501978	0.7	0.570066	0.97144	166600	0.0243025	2.00541	0.984771	0.997961	1.14466	0.000976424	0.00115023	0.000979796	00:00:00	378928	00:00:00			3.31326e+08	2022-04-22
2020-11-21	1.19044e+07	0			0.4	183253	370245	1.42852e+08	33668.5	2.01233		0	2020-11-21	0.431146		0.7	0.0266837	0.0134093	0.000974467	0.000974467	0.503064	0.7	0.568854	0.97144	166900	0.0243025	2.01014	0.984771	0.997873	1.14472	0.000974467	0.00114703	0.00097782	00:00:00	379787	00:00:00			3.31332e+08	2022-04-22
2020-11-22	1.19394e+07	0			0.4	190704	384610	1.43273e+08	35028.6	2.01615		0	2020-11-22	0.432408		0.7	0.0277187	0.0139294	0.000972514	0.000972514	0.504005	0.7	0.567592	0.97144	167200	0.0243025	2.01424	0.984771	0.997782	1.14435	0.000972514	0.00114385	0.00097585	00:00:00	380681	00:00:00			3.31337e+08	2022-04-22
2020-11-23	1.19758e+07	0			0.4	198439	399743	1.4371e+08	36431.8	2.01946		0	2020-11-23	0.43372		0.7	0.0287914	0.0144772	0.000970567	0.000970567	0.504819	0.7	0.56628	0.97144	167500	0.0243025	2.01781	0.984771	0.997688	1.14358	0.000970567	0.00114067	0.000973884	00:00:00	381610	00:00:00			3.31343e+08	2022-04-22
2020-11-24	1.20137e+07	0			0.4	206446	415598	1.44164e+08	37875.8	2.02234		0	2020-11-24	0.435085		0.7	0.0298997	0.0150512	0.000968625	0.000968625	0.505524	0.7	0.564915	0.97144	167800	0.0243025	2.0209	0.984771	0.99759	1.14245	0.000968625	0.0011375	0.000971924	00:00:00	382577	00:00:00			3.31348e+08	2022-04-22
2020-11-25	1.20531e+07	0			0.4	214716	432164	1.44637e+08	39357.9	2.02485		0	2020-11-25	0.436503		0.7	0.0310419	0.0156508	0.000966687	0.000966687	0.506136	0.7	0.563497	0.97144	168100	0.0243025	2.0236	0.984771	0.99749	1.141	0.000966687	0.00113435	0.000969969	00:00:00	383581	00:00:00			3.31353e+08	2022-04-22
2020-11-26	1.20939e+07	0			0.4	223238	449394	1.45127e+08	40875.6	2.02702		0	2020-11-26	0.437976		0.7	0.0322164	0.0162746	0.000964755	0.000964755	0.506665	0.7	0.562024	0.97144	168400	0.0243025	2.02593	0.984771	0.997386	1.13924	0.000964755	0.00113121	0.000968019	00:00:00	384624	00:00:00			3.31359e+08	2022-04-22
2020-11-27	1.21364e+07	0			0.4	231996	467263	1.45636e+08	42426.3	2.02891		0	2020-11-27	0.439505		0.7	0.0334208	0.0169214	0.000962828	0.000962828	0.507125	0.7	0.560495	0.97144	168700	0.0243025	2.02797	0.984771	0.997279	1.13719	0.000962828	0.00112808	0.000966074	00:00:00	385707	00:00:00			3.31364e+08	2022-04-22
2020-11-28	1.21804e+07	0			0.4	240974	485767	1.46164e+08	44006.3	2.03055		0	2020-11-28	0.441092		0.7	0.0346524	0.0175912	0.000960905	0.000960905	0.507523	0.7	0.558908	0.97144	169000	0.0243025	2.02973	0.984771	0.99717	1.13489	0.000960905	0.00112495	0.000964134	00:00:00	386830	00:00:00			3.3137e+08	2022-04-22
2020-11-29	1.2226e+07	0			0.4	250154	504867	1.46712e+08	45611.9	2.03198		0	2020-11-29	0.442736		0.7	0.0359088	0.0182826	0.000958988	0.000958988	0.507869	0.7	0.557264	0.97144	169300	0.0243025	2.03127	0.984771	0.997058	1.13235	0.000958988	0.00112184	0.000962199	00:00:00	387994	00:00:00			3.31375e+08	2022-04-22
2020-11-30	1.22732e+07	0			0.4	259517	524528	1.47279e+08	47239	2.03322		0	2020-11-30	0.444439		0.7	0.037187	0.0189943	0.000957075	0.000957075	0.508169	0.7	0.555561	0.97144	169600	0.0243025	2.0326	0.984771	0.996943	1.12958	0.000957075	0.00111874	0.000960268	00:00:00	389199	00:00:00			3.31381e+08	2022-04-22
2020-12-01	1.23221e+07	0			0.4	269043	544715	1.47865e+08	48883.3	2.0343		0	2020-12-01	0.446202		0.7	0.0384838	0.019725	0.000955167	0.000955167	0.508429	0.7	0.553798	0.97144	169900	0.0243025	2.03376	0.984771	0.996827	1.12659	0.000955167	0.00111565	0.000958343	00:00:00	390447	00:00:00			3.31386e+08	2022-04-22
2020-12-02	1.23726e+07	0			0.4	278707	565387	1.48472e+08	50539.9	2.03523		0	2020-12-02	0.448025		0.7	0.039796	0.0204732	0.000953264	0.000953264	0.508655	0.7	0.551975	0.97144	170200	0.0243025	2.03476	0.984771	0.996709	1.1234	0.000953264	0.00111257	0.000956423	00:00:00	391736	00:00:00			3.31392e+08	2022-04-22
2020-12-03	1.24248e+07	0			0.4	288484	586503	1.49098e+08	52203.9	2.03604		0	2020-12-03	0.449908		0.7	0.0411196	0.0212375	0.000951366	0.000951366	0.508852	0.7	0.550092	0.97144	170500	0.0243025	2.03564	0.984771	0.996589	1.12001	0.000951366	0.0011095	0.000954508	00:00:00	393068	00:00:00			3.31397e+08	2022-04-22
2020-12-04	1.24787e+07	0			0.4	298348	608019	1.49745e+08	53869.7	2.03675		0	2020-12-04	0.451851		0.7	0.0424508	0.0220162	0.000949473	0.000949473	0.509022	0.7	0.548149	0.97144	170800	0.0243025	2.0364	0.984771	0.996467	1.11644	0.000949473	0.00110645	0.000952597	00:00:00	394443	00:00:00			3.31403e+08	2022-04-22
2020-12-05	1.25342e+07	0			0.4	308267	629882	1.50411e+08	55531.4	2.03736		0	2020-12-05	0.453854		0.7	0.0437853	0.0228075	0.000947585	0.000947585	0.50917	0.7	0.546146	0.97144	171100	0.0243025	2.03706	0.984771	0.996345	1.1127	0.000947585	0.0011034	0.000950692	00:00:00	395860	00:00:00			3.31408e+08	2022-04-22
2020-12-06	1.25914e+07	0			0.4	318211	652036	1.51097e+08	57183	2.0379		0	2020-12-06	0.455918		0.7	0.0451186	0.0236093	0.000945701	0.000945701	0.509298	0.7	0.544082	0.97144	171400	0.0243025	2.03763	0.984771	0.996223	1.10878	0.000945701	0.00110036	0.000948791	00:00:00	397319	00:00:00			3.31413e+08	2022-04-22
2020-12-07	1.26503e+07	0			0.4	328146	674422	1.51803e+08	58818	2.03836		0	2020-12-07	0.45804		0.7	0.0464459	0.0244195	0.000943823	0.000943823	0.50941	0.7	0.54196	0.97144	171700	0.0243025	2.03813	0.984771	0.9961	1.10471	0.000943823	0.00109733	0.000946896	00:00:00	398820	00:00:00			3.31419e+08	2022-04-22
2020-12-08	1.27107e+07	0			0.4	338036	696976	1.52528e+08	60429.7	2.03876		0	2020-12-08	0.46022		0.7	0.0477623	0.0252357	0.000941949	0.000941949	0.509507	0.7	0.53978	0.97144	172000	0.0243025	2.03856	0.984771	0.995977	1.10048	0.000941949	0.00109431	0.000945005	00:00:00	400362	00:00:00			3.31424e+08	2022-04-22
2020-12-09	1.27727e+07	0			0.4	347843	719629	1.53272e+08	62011.1	2.03911		0	2020-12-09	0.462458		0.7	0.0490624	0.0260555	0.000940079	0.000940079	0.509591	0.7	0.537542	0.97144	172300	0.0243025	2.03894	0.984771	0.995855	1.09611	0.000940079	0.00109131	0.000943119	00:00:00	401945	00:00:00			3.3143e+08	2022-04-22
2020-12-10	1.28362e+07	0			0.4	357528	742309	1.54035e+08	63555.2	2.03942		0	2020-12-10	0.464751		0.7	0.0503409	0.0268762	0.000938215	0.000938215	0.509664	0.7	0.535249	0.97144	172600	0.0243025	2.03927	0.984771	0.995733	1.0916	0.000938215	0.00108831	0.000941237	00:00:00	403566	00:00:00			3.31435e+08	2022-04-22
2020-12-11	1.29013e+07	0			0.4	367052	764937	1.54816e+08	65054.5	2.03968		0	2020-12-11	0.467099		0.7	0.0515921	0.027695	0.000936355	0.000936355	0.509728	0.7	0.532901	0.97144	172900	0.0243025	2.03955	0.984771	0.995614	1.08695	0.000936355	0.00108532	0.000939361	00:00:00	405226	00:00:00			3.31441e+08	2022-04-22
2020-12-12	1.29678e+07	0			0.4	376370	787433	1.55614e+08	66501.8	2.03991		0	2020-12-12	0.469499		0.7	0.0528103	0.028509	0.0009345	0.0009345	0.509783	0.7	0.530501	0.97144	173200	0.0243025	2.0398	0.984771	0.995496	1.08218	0.0009345	0.00108235	0.000937489	00:00:00	406923	00:00:00			3.31446e+08	2022-04-22
2020-12-13	1.30357e+07	0			0.4	385442	809710	1.56428e+08	67889.7	2.04011		0	2020-12-13	0.471949		0.7	0.0539897	0.0293151	0.00093265	0.00093265	0.509831	0.7	0.528051	0.97144	173500	0.0243025	2.04001	0.984771	0.995381	1.07728	0.00093265	0.00107938	0.000935622	00:00:00	408656	00:00:00			3.31452e+08	2022-04-22
2020-12-14	1.31049e+07	0			0.4	394223	831682	1.57259e+08	69210.8	2.04028		0	2020-12-14	0.474447		0.7	0.0551243	0.03011	0.000930804	0.000930804	0.509872	0.7	0.525553	0.97144	173800	0.0243025	2.0402	0.984771	0.99527	1.07228	0.000930804	0.00107642	0.00093376	00:00:00	410422	00:00:00			3.31457e+08	2022-04-22
2020-12-15	1.31754e+07	0			0.4	402670	853257	1.58104e+08	70458	2.04043		0	2020-12-15	0.47699		0.7	0.0562084	0.0308906	0.000928963	0.000928963	0.509908	0.7	0.52301	0.97144	174100	0.0243025	2.04036	0.984771	0.995161	1.06717	0.000928963	0.00107348	0.000931902	00:00:00	412220	00:00:00			3.31462e+08	2022-04-22
2020-12-16	1.3247e+07	0			0.4	410739	874341	1.58964e+08	71624	2.04057		0	2020-12-16	0.479575		0.7	0.0572361	0.0316534	0.000927127	0.000927127	0.50994	0.7	0.520425	0.97144	174400	0.0243025	2.0405	0.984771	0.995057	1.06196	0.000927127	0.00107054	0.00093005	00:00:00	414047	00:00:00			3.31468e+08	2022-04-22
2020-12-17	1.33197e+07	0			0.4	418386	894839	1.59836e+08	72702.1	2.04068		0	2020-12-17	0.482199		0.7	0.0582017	0.032395	0.000925295	0.000925295	0.509967	0.7	0.517801	0.97144	174700	0.0243025	2.04062	0.984771	0.994958	1.05666	0.000925295	0.00106761	0.000928201	00:00:00	415903	00:00:00			3.31473e+08	2022-04-22
2020-12-18	1.33934e+07	0			0.4	425571	914655	1.6072e+08	73685.9	2.04078		0	2020-12-18	0.484859		0.7	0.0590996	0.0331118	0.000923468	0.000923468	0.509991	0.7	0.515141	0.97144	175000	0.0243025	2.04073	0.984771	0.994864	1.05129	0.000923468	0.00106469	0.000926358	00:00:00	417783	00:00:00			3.31479e+08	2022-04-22
2020-12-19	1.34679e+07	0			0.4	432250	933693	1.61615e+08	74569.4	2.04086		0	2020-12-19	0.48755		0.7	0.0599245	0.0338005	0.000921645	0.000921645	0.510011	0.7	0.51245	0.97144	175300	0.0243025	2.04082	0.984771	0.994775	1.04584	0.000921645	0.00106179	0.000924519	00:00:00	419686	00:00:00			3.31484e+08	2022-04-22
2020-12-20	1.35433e+07	0			0.4	438386	951857	1.62519e+08	75346.8	2.04094		0	2020-12-20	0.49027		0.7	0.0606713	0.0344574	0.000919827	0.000919827	0.510029	0.7	0.50973	0.97144	175600	0.0243025	2.0409	0.984771	0.994693	1.04033	0.000919827	0.00105889	0.000922685	00:00:00	421608	00:00:00			3.3149e+08	2022-04-22
2020-12-21	1.36193e+07	0			0.4	443942	969052	1.63432e+08	76013.3	2.041		0	2020-12-21	0.493014		0.7	0.0613353	0.0350793	0.000918014	0.000918014	0.510045	0.7	0.506986	0.97144	175900	0.0243025	2.04097	0.984771	0.994618	1.03476	0.000918014	0.001056	0.000920856	00:00:00	423548	00:00:00			3.31495e+08	2022-04-22
2020-12-22	1.36959e+07	0			0.4	448882	985187	1.6435e+08	76564.3	2.04106		0	2020-12-22	0.495777		0.7	0.0619123	0.0356628	0.000916205	0.000916205	0.510058	0.7	0.504223	0.97144	176200	0.0243025	2.04103	0.984771	0.994549	1.02915	0.000916205	0.00105312	0.000919031	00:00:00	425502	00:00:00			3.31501e+08	2022-04-22
2020-12-23	1.37729e+07	0			0.4	453176	1.00017e+06	1.65274e+08	76996.2	2.04111		0	2020-12-23	0.498556		0.7	0.0623983	0.0362047	0.000914401	0.000914401	0.51007	0.7	0.501444	0.97144	176500	0.0243025	2.04108	0.984771	0.994489	1.0235	0.000914401	0.00105025	0.000917211	00:00:00	427467	00:00:00			3.31506e+08	2022-04-22
2020-12-24	1.38502e+07	0			0.4	456796	1.01392e+06	1.66202e+08	77306	2.04115		0	2020-12-24	0.501346		0.7	0.0627901	0.0367018	0.000912601	0.000912601	0.51008	0.7	0.498654	0.97144	176800	0.0243025	2.04113	0.984771	0.994436	1.01783	0.000912601	0.00104739	0.000915395	00:00:00	429439	00:00:00			3.31511e+08	2022-04-22
2020-12-25	1.39277e+07	0			0.4	459718	1.02636e+06	1.67132e+08	77491.3	2.04119		0	2020-12-25	0.504143		0.7	0.0630847	0.0371514	0.000910806	0.000910806	0.510089	0.7	0.495857	0.97144	177100	0.0243025	2.04117	0.984771	0.994391	1.01214	0.000910806	0.00104454	0.000913584	00:00:00	431417	00:00:00			3.31517e+08	2022-04-22
2020-12-26	1.40052e+07	0			0.4	461922	1.03741e+06	1.68063e+08	77550.8	2.04122		0	2020-12-26	0.506942		0.7	0.0632799	0.0375507	0.000909015	0.000909015	0.510097	0.7	0.493058	0.97144	177400	0.0243025	2.0412	0.984771	0.994356	1.00644	0.000909015	0.0010417	0.000911777	00:00:00	433396	00:00:00			3.31522e+08	2022-04-22
2020-12-27	1.40827e+07	0			0.4	463392	1.047e+06	1.68992e+08	77483.8	2.04125		0	2020-12-27	0.509738		0.7	0.0633742	0.0378974	0.000907229	0.000907229	0.510103	0.7	0.490262	0.97144	177700	0.0243025	2.04123	0.984771	0.994329	1.00075	0.000907229	0.00103887	0.000909975	00:00:00	435373	00:00:00			3.31528e+08	2022-04-22
2020-12-28	1.416e+07	0			0.4	464119	1.05508e+06	1.6992e+08	77290.6	2.04127		0	2020-12-28	0.512527		0.7	0.0633665	0.0381892	0.000905447	0.000905447	0.510109	0.7	0.487473	0.97144	178000	0.0243025	2.04126	0.984771	0.994311	0.995064	0.000905447	0.00103605	0.000908178	00:00:00	437345	00:00:00			3.31533e+08	2022-04-22
2020-12-29	1.4237e+07	0			0.4	464095	1.0616e+06	1.70843e+08	76972.1	2.04129		0	2020-12-29	0.515305		0.7	0.0632566	0.0384244	0.000903669	0.000903669	0.510114	0.7	0.484695	0.97144	178300	0.0243025	2.04128	0.984771	0.994302	0.989405	0.000903669	0.00103324	0.000906384	00:00:00	439309	00:00:00			3.31539e+08	2022-04-22
2020-12-30	1.43135e+07	0			0.4	463319	1.0665e+06	1.71762e+08	76530.3	2.04131		0	2020-12-30	0.518066		0.7	0.0630448	0.0386013	0.000901896	0.000901896	0.510119	0.7	0.481934	0.97144	178600	0.0243025	2.0413	0.984771	0.994303	0.983777	0.000901896	0.00103043	0.000904596	00:00:00	441262	00:00:00			3.31544e+08	2022-04-22
2020-12-31	1.43895e+07	0			0.4	461795	1.06977e+06	1.72673e+08	75967.7	2.04133		0	2020-12-31	0.520807		0.7	0.0627321	0.0387189	0.000900128	0.000900128	0.510123	0.7	0.479193	0.97144	178900	0.0243025	2.04132	0.984771	0.994312	0.978189	0.000900128	0.00102764	0.000902812	00:00:00	443201	00:00:00			3.3155e+08	2022-04-22
2021-01-01	1.44647e+07	0			0.4	459532	1.07137e+06	1.73577e+08	75287.7	2.04134		0	2021-01-01	0.523524		0.7	0.0623202	0.0387762	0.000898364	0.000898364	0.510126	0.7	0.476476	0.97144	179200	0.0243025	2.04133	0.984771	0.994331	0.972651	0.000898364	0.00102485	0.000901032	00:00:00	445122	00:00:00			3.31555e+08	2022-04-22
2021-01-02	1.45392e+07	0			0.4	456543	1.0713e+06	1.74471e+08	74494.5	2.04135		0	2021-01-02	0.526211		0.7	0.0618113	0.0387728	0.000896604	0.000896604	0.510129	0.7	0.473789	0.97144	179500	0.0243025	2.04135	0.984771	0.99436	0.96717	0.000896604	0.00102208	0.000899257	00:00:00	447023	00:00:00			3.31561e+08	2022-04-22
2021-01-03	1.46128e+07	0			0.4	452845	1.06954e+06	1.75354e+08	73592.8	2.04136		0	2021-01-03	0.528866		0.7	0.0612084	0.0387087	0.000894848	0.000894848	0.510131	0.7	0.471134	0.97144	179800	0.0243025	2.04136	0.984771	0.994397	0.961756	0.000894848	0.00101931	0.000897486	00:00:00	448901	00:00:00			3.31566e+08	2022-04-22
2021-01-04	1.46854e+07	0			0.4	448461	1.06612e+06	1.76225e+08	72588	2.04137		0	2021-01-04	0.531484		0.7	0.0605148	0.0385841	0.000893097	0.000893097	0.510133	0.7	0.468516	0.97144	180100	0.0243025	2.04137	0.984771	0.994442	0.956415	0.000893097	0.00101655	0.00089572	00:00:00	450753	00:00:00			3.31571e+08	2022-04-22
2021-01-05	1.47569e+07	0			0.4	443417	1.06104e+06	1.77083e+08	71486.1	2.04138		0	2021-01-05	0.534063		0.7	0.0597347	0.0383997	0.00089135	0.00089135	0.510135	0.7	0.465937	0.97144	180400	0.0243025	2.04138	0.984771	0.994497	0.951155	0.00089135	0.00101381	0.000893958	00:00:00	452577	00:00:00			3.31577e+08	2022-04-22
2021-01-06	1.48272e+07	0			0.4	437742	1.05433e+06	1.77926e+08	70293.2	2.04139		0	2021-01-06	0.536598		0.7	0.0588723	0.0381565	0.000889608	0.000889608	0.510137	0.7	0.463402	0.97144	180700	0.0243025	2.04138	0.984771	0.994559	0.945983	0.000889608	0.00101107	0.0008922	00:00:00	454371	00:00:00			3.31582e+08	2022-04-22
2021-01-07	1.48962e+07	0			0.4	431471	1.04605e+06	1.78755e+08	69016.3	2.04139		0	2021-01-07	0.539087		0.7	0.0579327	0.0378559	0.00088787	0.00088787	0.510138	0.7	0.460913	0.97144	181000	0.0243025	2.04139	0.984771	0.994629	0.940905	0.00088787	0.00100834	0.000890447	00:00:00	456132	00:00:00			3.31588e+08	2022-04-22
2021-01-08	1.49639e+07	0			0.4	424639	1.03622e+06	1.79567e+08	67662.4	2.0414		0	2021-01-08	0.541526		0.7	0.056921	0.0374995	0.000886136	0.000886136	0.51014	0.7	0.458474	0.97144	181300	0.0243025	2.0414	0.984771	0.994707	0.935927	0.000886136	0.00100561	0.000888698	00:00:00	457858	00:00:00			3.31593e+08	2022-04-22
2021-01-09	1.50301e+07	0			0.4	417285	1.0249e+06	1.80361e+08	66238.6	2.0414		0	2021-01-09	0.543915		0.7	0.0558428	0.0370896	0.000884406	0.000884406	0.510141	0.7	0.456085	0.97144	181600	0.0243025	2.0414	0.984771	0.994791	0.931054	0.000884406	0.0010029	0.000886954	00:00:00	459549	00:00:00			3.31599e+08	2022-04-22
2021-01-10	1.50949e+07	0			0.4	409449	1.01217e+06	1.81138e+08	64752.5	2.04141		0	2021-01-10	0.546249		0.7	0.0547039	0.0366282	0.000882681	0.000882681	0.510142	0.7	0.453751	0.97144	181900	0.0243025	2.0414	0.984771	0.994882	0.92629	0.000882681	0.0010002	0.000885214	00:00:00	461201	00:00:00			3.31604e+08	2022-04-22
2021-01-11	1.51581e+07	0			0.4	401175	998094	1.81897e+08	63211.6	2.04141		0	2021-01-11	0.548527		0.7	0.0535101	0.0361182	0.00088096	0.00088096	0.510142	0.7	0.451473	0.97144	182200	0.0243025	2.04141	0.984771	0.994979	0.921641	0.00088096	0.000997503	0.000883478	00:00:00	462814	00:00:00			3.3161e+08	2022-04-22
2021-01-12	1.52197e+07	0			0.4	392505	982745	1.82636e+08	61623.2	2.04141		0	2021-01-12	0.550748		0.7	0.0522676	0.0355621	0.000879243	0.000879243	0.510143	0.7	0.449252	0.97144	182500	0.0243025	2.04141	0.984771	0.995081	0.917108	0.000879243	0.000994817	0.000881746	00:00:00	464386	00:00:00			3.31615e+08	2022-04-22
2021-01-13	1.52797e+07	0			0.4	383483	966210	1.83356e+08	59994.9	2.04142		0	2021-01-13	0.55291		0.7	0.0509825	0.0349632	0.000877531	0.000877531	0.510144	0.7	0.44709	0.97144	182800	0.0243025	2.04141	0.984771	0.995188	0.912696	0.000877531	0.000992139	0.000880019	00:00:00	465917	00:00:00			3.31621e+08	2022-04-22
2021-01-14	1.5338e+07	0			0.4	374155	948576	1.84056e+08	58334	2.04142		0	2021-01-14	0.555012		0.7	0.0496608	0.0343246	0.000875822	0.000875822	0.510144	0.7	0.444988	0.97144	183100	0.0243025	2.04142	0.984771	0.995299	0.908406	0.000875822	0.00098947	0.000878296	00:00:00	467406	00:00:00			3.31626e+08	2022-04-22
2021-01-15	1.53947e+07	0			0.4	364564	929936	1.84736e+08	56647.5	2.04142		0	2021-01-15	0.557053		0.7	0.0483087	0.0336495	0.000874118	0.000874118	0.510145	0.7	0.442947	0.97144	183400	0.0243025	2.04142	0.984771	0.995414	0.904241	0.000874118	0.00098681	0.000876577	00:00:00	468851	00:00:00			3.31631e+08	2022-04-22
2021-01-16	1.54496e+07	0			0.4	354754	910384	1.85395e+08	54942.3	2.04142		0	2021-01-16	0.559032		0.7	0.0469319	0.0329415	0.000872418	0.000872418	0.510145	0.7	0.440968	0.97144	183700	0.0243025	2.04142	0.984771	0.995532	0.900202	0.000872418	0.000984159	0.000874863	00:00:00	470253	00:00:00			3.31637e+08	2022-04-22
2021-01-17	1.55028e+07	0			0.4	344767	890016	1.86034e+08	53225	2.04142		0	2021-01-17	0.560948		0.7	0.0455364	0.0322039	0.000870722	0.000870722	0.510145	0.7	0.439052	0.97144	184000	0.0243025	2.04142	0.984771	0.995653	0.89629	0.000870722	0.000981516	0.000873152	00:00:00	471612	00:00:00			3.31642e+08	2022-04-22
2021-01-18	1.55543e+07	0			0.4	334646	868930	1.86652e+08	51501.9	2.04142		0	2021-01-18	0.562802		0.7	0.0441277	0.0314405	0.00086903	0.00086903	0.510146	0.7	0.437198	0.97144	184300	0.0243025	2.04142	0.984771	0.995777	0.892505	0.00086903	0.000978882	0.000871446	00:00:00	472926	00:00:00			3.31648e+08	2022-04-22
2021-01-19	1.56041e+07	0			0.4	324430	847223	1.8725e+08	49778.9	2.04142		0	2021-01-19	0.564594		0.7	0.042711	0.0306545	0.000867343	0.000867343	0.510146	0.7	0.435406	0.97144	184600	0.0243025	2.04142	0.984771	0.995901	0.888848	0.000867343	0.000976256	0.000869744	00:00:00	474196	00:00:00			3.31653e+08	2022-04-22
2021-01-20	1.56522e+07	0			0.4	314157	824991	1.87826e+08	48061.5	2.04143		0	2021-01-20	0.566324		0.7	0.0412915	0.0298496	0.00086566	0.00086566	0.510146	0.7	0.433676	0.97144	184900	0.0243025	2.04143	0.984771	0.996027	0.885317	0.00086566	0.000973639	0.000868047	00:00:00	475422	00:00:00			3.31659e+08	2022-04-22
2021-01-21	1.56985e+07	0			0.4	303864	802329	1.88383e+08	46354.8	2.04143		0	2021-01-21	0.567992		0.7	0.039874	0.0290292	0.00086398	0.00086398	0.510146	0.7	0.432008	0.97144	185200	0.0243025	2.04143	0.984771	0.996154	0.881913	0.00086398	0.00097103	0.000866353	00:00:00	476605	00:00:00			3.31664e+08	2022-04-22
2021-01-22	1.57432e+07	0			0.4	293586	779330	1.88918e+08	44663.7	2.04143		0	2021-01-22	0.569599		0.7	0.0384629	0.0281966	0.000862305	0.000862305	0.510147	0.7	0.430401	0.97144	185500	0.0243025	2.04143	0.984771	0.996281	0.878633	0.000862305	0.00096843	0.000864664	00:00:00	477745	00:00:00			3.3167e+08	2022-04-22
2021-01-23	1.57862e+07	0			0.4	283353	756084	1.89434e+08	42992.4	2.04143		0	2021-01-23	0.571145		0.7	0.0370624	0.0273551	0.000860634	0.000860634	0.510147	0.7	0.428855	0.97144	185800	0.0243025	2.04143	0.984771	0.996408	0.875477	0.000860634	0.000965838	0.000862978	00:00:00	478842	00:00:00			3.31675e+08	2022-04-22
2021-01-24	1.58275e+07	0			0.4	273196	732677	1.89931e+08	41344.9	2.04143		0	2021-01-24	0.572631		0.7	0.0356762	0.0265078	0.000858967	0.000858967	0.510147	0.7	0.427369	0.97144	186100	0.0243025	2.04143	0.984771	0.996534	0.872443	0.000858967	0.000963254	0.000861297	00:00:00	479897	00:00:00			3.3168e+08	2022-04-22
2021-01-25	1.58673e+07	0			0.4	263142	709190	1.90407e+08	39724.7	2.04143		0	2021-01-25	0.574059		0.7	0.034308	0.0256576	0.000857304	0.000857304	0.510147	0.7	0.425941	0.97144	186400	0.0243025	2.04143	0.984771	0.996659	0.869529	0.000857304	0.000960679	0.00085962	00:00:00	480911	00:00:00			3.31686e+08	2022-04-22
2021-01-26	1.59054e+07	0			0.4	253215	685701	1.90865e+08	38134.9	2.04143		0	2021-01-26	0.575429		0.7	0.0329607	0.0248074	0.000855645	0.000855645	0.510147	0.7	0.424571	0.97144	186700	0.0243025	2.04143	0.984771	0.996783	0.866732	0.000855645	0.000958112	0.000857947	00:00:00	481884	00:00:00			3.31691e+08	2022-04-22
2021-01-27	1.5942e+07	0			0.4	243439	662285	1.91304e+08	36578.3	2.04143		0	2021-01-27	0.576743		0.7	0.0316373	0.0239599	0.00085399	0.00085399	0.510147	0.7	0.423257	0.97144	187000	0.0243025	2.04143	0.984771	0.996905	0.86405	0.00085399	0.000955553	0.000856279	00:00:00	482817	00:00:00			3.31697e+08	2022-04-22
2021-01-28	1.5977e+07	0			0.4	233832	639008	1.91724e+08	35057.2	2.04143		0	2021-01-28	0.578002		0.7	0.0303402	0.0231174	0.000852339	0.000852339	0.510147	0.7	0.421998	0.97144	187300	0.0243025	2.04143	0.984771	0.997026	0.86148	0.000852339	0.000953002	0.000854614	00:00:00	483712	00:00:00			3.31702e+08	2022-04-22
2021-01-29	1.60106e+07	0			0.4	224414	615934	1.92127e+08	33573.7	2.04143		0	2021-01-29	0.579207		0.7	0.0290715	0.0222823	0.000850692	0.000850692	0.510147	0.7	0.420793	0.97144	187600	0.0243025	2.04143	0.984771	0.997144	0.85902	0.000850692	0.00095046	0.000852953	00:00:00	484569	00:00:00			3.31708e+08	2022-04-22
2021-01-30	1.60427e+07	0			0.4	215198	593121	1.92513e+08	32129.3	2.04143		0	2021-01-30	0.58036		0.7	0.0278332	0.0214566	0.000849049	0.000849049	0.510147	0.7	0.41964	0.97144	187900	0.0243025	2.04143	0.984771	0.99726	0.856667	0.000849049	0.000947925	0.000851296	00:00:00	485388	00:00:00			3.31713e+08	2022-04-22
2021-01-31	1.60735e+07	0			0.4	206199	570622	1.92882e+08	30725.5	2.04143		0	2021-01-31	0.581462		0.7	0.0266267	0.0206424	0.00084741	0.00084741	0.510147	0.7	0.418538	0.97144	188200	0.0243025	2.04143	0.984771	0.997374	0.854417	0.00084741	0.000945399	0.000849644	00:00:00	486173	00:00:00			3.31719e+08	2022-04-22
2021-02-01	1.61028e+07	0			0.4	197427	548483	1.93234e+08	29363.3	2.04143		0	2021-02-01	0.582514		0.7	0.0254535	0.0198412	0.000845775	0.000845775	0.510148	0.7	0.417486	0.97144	188500	0.0243025	2.04143	0.984771	0.997485	0.852269	0.000845775	0.000942881	0.000847995	00:00:00	486922	00:00:00			3.31724e+08	2022-04-22
2021-02-02	1.61309e+07	0			0.4	188893	526748	1.9357e+08	28043.5	2.04143		0	2021-02-02	0.583519		0.7	0.0243144	0.0190546	0.000844144	0.000844144	0.510148	0.7	0.416481	0.97144	188800	0.0243025	2.04143	0.984771	0.997593	0.850217	0.000844144	0.000940371	0.000846351	00:00:00	487637	00:00:00			3.3173e+08	2022-04-22
2021-02-03	1.61576e+07	0			0.4	180602	505453	1.93892e+08	26766.6	2.04143		0	2021-02-03	0.584478		0.7	0.0232104	0.018284	0.000842517	0.000842517	0.510148	0.7	0.415522	0.97144	189100	0.0243025	2.04143	0.984771	0.997698	0.84826	0.000842517	0.000937869	0.00084471	00:00:00	488320	00:00:00			3.31735e+08	2022-04-22
2021-02-04	1.61832e+07	0			0.4	172561	484631	1.94198e+08	25532.9	2.04143		0	2021-02-04	0.585392		0.7	0.0221419	0.0175305	0.000840894	0.000840894	0.510148	0.7	0.414608	0.97144	189400	0.0243025	2.04143	0.984771	0.9978	0.846394	0.000840894	0.000935375	0.000843073	00:00:00	488972	00:00:00			3.3174e+08	2022-04-22
2021-02-05	1.62075e+07	0			0.4	164774	464310	1.9449e+08	24342.5	2.04143		0	2021-02-05	0.586263		0.7	0.0211093	0.0167951	0.000839275	0.000839275	0.510148	0.7	0.413737	0.97144	189700	0.0243025	2.04143	0.984771	0.997899	0.844617	0.000839275	0.000932889	0.000841441	00:00:00	489593	00:00:00			3.31746e+08	2022-04-22
2021-02-06	1.62307e+07	0			0.4	157244	444512	1.94769e+08	23195.2	2.04143		0	2021-02-06	0.587092		0.7	0.0201128	0.0160788	0.00083766	0.00083766	0.510148	0.7	0.412908	0.97144	190000	0.0243025	2.04143	0.984771	0.997995	0.842924	0.00083766	0.00093041	0.000839812	00:00:00	490185	00:00:00			3.31751e+08	2022-04-22
2021-02-07	1.62528e+07	0			0.4	149971	425258	1.95034e+08	22090.8	2.04143		0	2021-02-07	0.587881		0.7	0.0191523	0.0153821	0.000836048	0.000836048	0.510148	0.7	0.412119	0.97144	190300	0.0243025	2.04143	0.984771	0.998088	0.841312	0.000836048	0.00092794	0.000838187	00:00:00	490749	00:00:00			3.31757e+08	2022-04-22
2021-02-08	1.62738e+07	0			0.4	142957	406563	1.95286e+08	21028.8	2.04143		0	2021-02-08	0.588632		0.7	0.0182277	0.0147056	0.000834441	0.000834441	0.510148	0.7	0.411368	0.97144	190600	0.0243025	2.04143	0.984771	0.998178	0.839779	0.000834441	0.000925477	0.000836566	00:00:00	491285	00:00:00			3.31762e+08	2022-04-22
2021-02-09	1.62938e+07	0			0.4	136199	388436	1.95526e+08	20008.7	2.04143		0	2021-02-09	0.589346		0.7	0.0173388	0.0140497	0.000832837	0.000832837	0.510148	0.7	0.410654	0.97144	190900	0.0243025	2.04143	0.984771	0.998264	0.838321	0.000832837	0.000923023	0.000834949	00:00:00	491796	00:00:00			3.31768e+08	2022-04-22
2021-02-10	1.63129e+07	0			0.4	129696	370888	1.95754e+08	19029.7	2.04143		0	2021-02-10	0.590025		0.7	0.016485	0.0134147	0.000831237	0.000831237	0.510148	0.7	0.409975	0.97144	191200	0.0243025	2.04143	0.984771	0.998348	0.836936	0.000831237	0.000920576	0.000833336	00:00:00	492281	00:00:00			3.31773e+08	2022-04-22
2021-02-11	1.6331e+07	0			0.4	123444	353922	1.95972e+08	18091.2	2.04143		0	2021-02-11	0.59067		0.7	0.0156658	0.0128009	0.000829641	0.000829641	0.510148	0.7	0.40933	0.97144	191500	0.0243025	2.04143	0.984771	0.998428	0.83562	0.000829641	0.000918137	0.000831727	00:00:00	492743	00:00:00			3.31779e+08	2022-04-22
2021-02-12	1.63482e+07	0			0.4	117441	337540	1.96178e+08	17192.1	2.04143		0	2021-02-12	0.591282		0.7	0.0148807	0.0122082	0.000828049	0.000828049	0.510148	0.7	0.408718	0.97144	191800	0.0243025	2.04143	0.984771	0.998505	0.834371	0.000828049	0.000915705	0.000830122	00:00:00	493182	00:00:00			3.31784e+08	2022-04-22
2021-02-13	1.63645e+07	0			0.4	111682	321742	1.96374e+08	16331.6	2.04143		0	2021-02-13	0.591863		0.7	0.0141289	0.0116366	0.000826461	0.000826461	0.510148	0.7	0.408137	0.97144	192100	0.0243025	2.04143	0.984771	0.998579	0.833185	0.000826461	0.000913281	0.000828521	00:00:00	493599	00:00:00			3.3179e+08	2022-04-22
2021-02-14	1.638e+07	0			0.4	106162	306526	1.9656e+08	15508.6	2.04143		0	2021-02-14	0.592414		0.7	0.0134096	0.0110861	0.000824876	0.000824876	0.510148	0.7	0.407586	0.97144	192400	0.0243025	2.04143	0.984771	0.99865	0.83206	0.000824876	0.000910865	0.000826923	00:00:00	493994	00:00:00			3.31795e+08	2022-04-22
2021-02-15	1.63947e+07	0			0.4	100875	291884	1.96737e+08	14722.2	2.04143		0	2021-02-15	0.592936		0.7	0.012722	0.0105564	0.000823295	0.000823295	0.510148	0.7	0.407064	0.97144	192700	0.0243025	2.04143	0.984771	0.998718	0.830992	0.000823295	0.000908457	0.000825329	00:00:00	494370	00:00:00			3.318e+08	2022-04-22
2021-02-16	1.64087e+07	0			0.4	95816.8	277812	1.96904e+08	13971.1	2.04143		0	2021-02-16	0.593432		0.7	0.0120652	0.0100473	0.000821718	0.000821718	0.510148	0.7	0.406568	0.97144	193000	0.0243025	2.04143	0.984771	0.998783	0.829981	0.000821718	0.000906056	0.00082374	00:00:00	494727	00:00:00			3.31806e+08	2022-04-22
2021-02-17	1.64219e+07	0			0.4	90980	264300	1.97063e+08	13254.3	2.04143		0	2021-02-17	0.593902		0.7	0.0114384	0.00955843	0.000820145	0.000820145	0.510148	0.7	0.406098	0.97144	193300	0.0243025	2.04143	0.984771	0.998845	0.829022	0.000820145	0.000903663	0.000822154	00:00:00	495065	00:00:00			3.31811e+08	2022-04-22
2021-02-18	1.64345e+07	0			0.4	86358.6	251338	1.97214e+08	12570.7	2.04143		0	2021-02-18	0.594346		0.7	0.0108405	0.0090895	0.000818576	0.000818576	0.510148	0.7	0.405654	0.97144	193600	0.0243025	2.04143	0.984771	0.998905	0.828114	0.000818576	0.000901277	0.000820571	00:00:00	495386	00:00:00			3.31817e+08	2022-04-22
2021-02-19	1.64464e+07	0			0.4	81946.1	238914	1.97357e+08	11919.1	2.04143		0	2021-02-19	0.594768		0.7	0.0102707	0.00864008	0.00081701	0.00081701	0.510148	0.7	0.405232	0.97144	193900	0.0243025	2.04143	0.984771	0.998961	0.827254	0.00081701	0.000898898	0.000818993	00:00:00	495690	00:00:00			3.31822e+08	2022-04-22
2021-02-20	1.64577e+07	0			0.4	77735.9	227017	1.97493e+08	11298.4	2.04143		0	2021-02-20	0.595167		0.7	0.00972799	0.00820971	0.000815448	0.000815448	0.510148	0.7	0.404833	0.97144	194200	0.0243025	2.04143	0.984771	0.999016	0.82644	0.000815448	0.000896528	0.000817418	00:00:00	495978	00:00:00			3.31828e+08	2022-04-22
2021-02-21	1.64684e+07	0			0.4	73721.1	215634	1.97621e+08	10707.3	2.04143		0	2021-02-21	0.595544		0.7	0.00921134	0.00779792	0.00081389	0.00081389	0.510148	0.7	0.404456	0.97144	194500	0.0243025	2.04143	0.984771	0.999068	0.825669	0.00081389	0.000894164	0.000815847	00:00:00	496251	00:00:00			3.31833e+08	2022-04-22
2021-02-22	1.64786e+07	0			0.4	69894.8	204750	1.97743e+08	10144.9	2.04143		0	2021-02-22	0.595901		0.7	0.00871981	0.0074042	0.000812335	0.000812335	0.510148	0.7	0.404099	0.97144	194800	0.0243025	2.04143	0.984771	0.999117	0.824941	0.000812335	0.000891808	0.00081428	00:00:00	496510	00:00:00			3.31839e+08	2022-04-22
2021-02-23	1.64882e+07	0			0.4	66250.3	194351	1.97858e+08	9609.84	2.04143		0	2021-02-23	0.596239		0.7	0.00825242	0.00702804	0.000810784	0.000810784	0.510148	0.7	0.403761	0.97144	195100	0.0243025	2.04143	0.984771	0.999164	0.824251	0.000810784	0.00088946	0.000812717	00:00:00	496755	00:00:00			3.31844e+08	2022-04-22
2021-02-24	1.64973e+07	0			0.4	62780.7	184423	1.97968e+08	9101.15	2.04143		0	2021-02-24	0.596558		0.7	0.00780823	0.0066689	0.000809237	0.000809237	0.510148	0.7	0.403442	0.97144	195400	0.0243025	2.04143	0.984771	0.999209	0.823599	0.000809237	0.000887118	0.000811157	00:00:00	496988	00:00:00			3.3185e+08	2022-04-22
2021-02-25	1.65059e+07	0			0.4	59479.3	174949	1.98071e+08	8617.69	2.04143		0	2021-02-25	0.59686		0.7	0.00738628	0.00632622	0.000807694	0.000807694	0.510148	0.7	0.40314	0.97144	195700	0.0243025	2.04143	0.984771	0.999252	0.822983	0.000807694	0.000884784	0.000809601	00:00:00	497207	00:00:00			3.31855e+08	2022-04-22
2021-02-26	1.65141e+07	0			0.4	56339.3	165915	1.98169e+08	8158.41	2.04143		0	2021-02-26	0.597145		0.7	0.00698564	0.00599946	0.000806154	0.000806154	0.510148	0.7	0.402855	0.97144	196000	0.0243025	2.04143	0.984771	0.999293	0.822401	0.000806154	0.000882458	0.000808049	00:00:00	497416	00:00:00			3.3186e+08	2022-04-22
2021-02-27	1.65218e+07	0			0.4	53354.2	157306	1.98261e+08	7722.25	2.04143		0	2021-02-27	0.597414		0.7	0.0066054	0.00568806	0.000804618	0.000804618	0.510148	0.7	0.402586	0.97144	196300	0.0243025	2.04143	0.984771	0.999331	0.821851	0.000804618	0.000880138	0.0008065	00:00:00	497613	00:00:00			3.31866e+08	2022-04-22
2021-02-28	1.65291e+07	0			0.4	50517.5	149106	1.98349e+08	7308.2	2.04143		0	2021-02-28	0.597669		0.7	0.00624467	0.00539145	0.000803085	0.000803085	0.510148	0.7	0.402331	0.97144	196600	0.0243025	2.04143	0.984771	0.999368	0.821332	0.000803085	0.000877826	0.000804956	00:00:00	497799	00:00:00			3.31871e+08	2022-04-22
2021-03-01	1.6536e+07	0			0.4	47823	141299	1.98432e+08	6915.28	2.04143		0	2021-03-01	0.597909		0.7	0.00590258	0.00510908	0.000801556	0.000801556	0.510148	0.7	0.402091	0.97144	196900	0.0243025	2.04143	0.984771	0.999403	0.820841	0.000801556	0.000875521	0.000803414	00:00:00	497976	00:00:00			3.31877e+08	2022-04-22
2021-03-02	1.65426e+07	0			0.4	45264.3	133870	1.98511e+08	6542.51	2.04143		0	2021-03-02	0.598136		0.7	0.00557828	0.0048404	0.000800031	0.000800031	0.510148	0.7	0.401864	0.97144	197200	0.0243025	2.04143	0.984771	0.999436	0.820378	0.000800031	0.000873224	0.000801877	00:00:00	498143	00:00:00			3.31882e+08	2022-04-22
2021-03-03	1.65487e+07	0			0.4	42835.6	126805	1.98585e+08	6188.98	2.04143		0	2021-03-03	0.59835		0.7	0.00527095	0.00458486	0.000798509	0.000798509	0.510148	0.7	0.40165	0.97144	197500	0.0243025	2.04143	0.984771	0.999468	0.819942	0.000798509	0.000870933	0.000800343	00:00:00	498300	00:00:00			3.31888e+08	2022-04-22
2021-03-04	1.65546e+07	0			0.4	40531	120088	1.98655e+08	5853.79	2.04143		0	2021-03-04	0.598552		0.7	0.0049798	0.00434192	0.000796991	0.000796991	0.510148	0.7	0.401448	0.97144	197800	0.0243025	2.04143	0.984771	0.999498	0.81953	0.000796991	0.00086865	0.000798813	00:00:00	498450	00:00:00			3.31893e+08	2022-04-22
2021-03-05	1.65601e+07	0			0.4	38344.8	113705	1.98722e+08	5536.06	2.04143		0	2021-03-05	0.598742		0.7	0.00470406	0.00411107	0.000795476	0.000795476	0.510148	0.7	0.401258	0.97144	198100	0.0243025	2.04143	0.984771	0.999526	0.819141	0.000795476	0.000866373	0.000797286	00:00:00	498591	00:00:00			3.31899e+08	2022-04-22
2021-03-06	1.65654e+07	0			0.4	36271.6	107641	1.98784e+08	5234.97	2.04143		0	2021-03-06	0.598921		0.7	0.00444299	0.00389177	0.000793965	0.000793965	0.510148	0.7	0.401079	0.97144	198400	0.0243025	2.04143	0.984771	0.999553	0.818775	0.000793965	0.000864104	0.000795763	00:00:00	498725	00:00:00			3.31904e+08	2022-04-22
2021-03-07	1.65703e+07	0			0.4	34306	101884	1.98844e+08	4949.71	2.04143		0	2021-03-07	0.59909		0.7	0.00419588	0.00368355	0.000792458	0.000792458	0.510148	0.7	0.40091	0.97144	198700	0.0243025	2.04143	0.984771	0.999578	0.81843	0.000792458	0.000861842	0.000794244	00:00:00	498851	00:00:00			3.3191e+08	2022-04-22
2021-03-08	1.6575e+07	0			0.4	32443	96418.3	1.989e+08	4679.51	2.04143		0	2021-03-08	0.59925		0.7	0.00396204	0.00348589	0.000790954	0.000790954	0.510148	0.7	0.40075	0.97144	199000	0.0243025	2.04143	0.984771	0.999603	0.818104	0.000790954	0.000859586	0.000792728	00:00:00	498970	00:00:00			3.31915e+08	2022-04-22
2021-03-09	1.65794e+07	0			0.4	30677.7	91232.1	1.98953e+08	4423.63	2.04143		0	2021-03-09	0.5994		0.7	0.00374081	0.00329834	0.000789454	0.000789454	0.510148	0.7	0.4006	0.97144	199300	0.0243025	2.04143	0.984771	0.999626	0.817798	0.000789454	0.000857338	0.000791216	00:00:00	499083	00:00:00			3.3192e+08	2022-04-22
2021-03-10	1.65836e+07	0			0.4	29005.2	86312.3	1.99003e+08	4181.35	2.04143		0	2021-03-10	0.599541		0.7	0.00353156	0.00312042	0.000787957	0.000787957	0.510148	0.7	0.400459	0.97144	199600	0.0243025	2.04143	0.984771	0.999647	0.817509	0.000787957	0.000855097	0.000789707	00:00:00	499190	00:00:00			3.31926e+08	2022-04-22
2021-03-11	1.65876e+07	0			0.4	27421.2	81646.6	1.99051e+08	3952.01	2.04143		0	2021-03-11	0.599674		0.7	0.00333368	0.00295169	0.000786464	0.000786464	0.510148	0.7	0.400326	0.97144	199900	0.0243025	2.04143	0.984771	0.999668	0.817238	0.000786464	0.000852862	0.000788202	00:00:00	499291	00:00:00			3.31931e+08	2022-04-22
2021-03-12	1.65913e+07	0			0.4	25921.1	77223.2	1.99096e+08	3734.94	2.04143		0	2021-03-12	0.599799		0.7	0.0031466	0.00279173	0.000784974	0.000784974	0.510148	0.7	0.400201	0.97144	200200	0.0243025	2.04143	0.984771	0.999687	0.816982	0.000784974	0.000850635	0.0007867	00:00:00	499386	00:00:00			3.31937e+08	2022-04-22
2021-03-13	1.65948e+07	0			0.4	24501	73030.4	1.99138e+08	3529.52	2.04143		0	2021-03-13	0.599917		0.7	0.00296975	0.00264011	0.000783488	0.000783488	0.510148	0.7	0.400083	0.97144	200500	0.0243025	2.04143	0.984771	0.999706	0.816742	0.000783488	0.000848414	0.000785202	00:00:00	499476	00:00:00			3.31942e+08	2022-04-22
2021-03-14	1.65982e+07	0			0.4	23156.6	69057.4	1.99178e+08	3335.16	2.04143		0	2021-03-14	0.600028		0.7	0.00280261	0.00249644	0.000782005	0.000782005	0.510148	0.7	0.399972	0.97144	200800	0.0243025	2.04143	0.984771	0.999723	0.816516	0.000782005	0.0008462	0.000783708	00:00:00	499561	00:00:00			3.31948e+08	2022-04-22
2021-03-15	1.66013e+07	0			0.4	21884.3	65293.4	1.99216e+08	3151.29	2.04143		0	2021-03-15	0.600132		0.7	0.00264467	0.00236034	0.000780525	0.000780525	0.510148	0.7	0.399868	0.97144	201100	0.0243025	2.04143	0.984771	0.99974	0.816304	0.000780525	0.000843993	0.000782217	00:00:00	499642	00:00:00			3.31953e+08	2022-04-22
2021-03-16	1.66043e+07	0			0.4	20680.3	61728.3	1.99251e+08	2977.37	2.04143		0	2021-03-16	0.60023		0.7	0.00249544	0.00223142	0.00077905	0.00077905	0.510148	0.7	0.39977	0.97144	201400	0.0243025	2.04143	0.984771	0.999756	0.816104	0.00077905	0.000841793	0.000780729	00:00:00	499718	00:00:00			3.31959e+08	2022-04-22
2021-03-17	1.66071e+07	0			0.4	19541.2	58352.2	1.99285e+08	2812.88	2.04143		0	2021-03-17	0.600321		0.7	0.00235448	0.00210934	0.000777577	0.000777577	0.510148	0.7	0.399679	0.97144	201700	0.0243025	2.04143	0.984771	0.99977	0.815917	0.000777577	0.0008396	0.000779245	00:00:00	499789	00:00:00			3.31964e+08	2022-04-22
2021-03-18	1.66098e+07	0			0.4	18463.5	55155.7	1.99317e+08	2657.33	2.04143		0	2021-03-18	0.600408		0.7	0.00222134	0.00199376	0.000776108	0.000776108	0.510148	0.7	0.399592	0.97144	202000	0.0243025	2.04143	0.984771	0.999784	0.815741	0.000776108	0.000837413	0.000777765	00:00:00	499857	00:00:00			3.3197e+08	2022-04-22
2021-03-19	1.66123e+07	0			0.4	17444.3	52129.9	1.99347e+08	2510.24	2.04143		0	2021-03-19	0.600489		0.7	0.0020956	0.00188435	0.000774642	0.000774642	0.510148	0.7	0.399511	0.97144	202300	0.0243025	2.04143	0.984771	0.999798	0.815576	0.000774642	0.000835233	0.000776288	00:00:00	499921	00:00:00			3.31975e+08	2022-04-22
2021-03-20	1.66146e+07	0			0.4	16480.3	49266.1	1.99376e+08	2371.19	2.04143		0	2021-03-20	0.600564		0.7	0.00197686	0.00178081	0.00077318	0.00077318	0.510148	0.7	0.399436	0.97144	202600	0.0243025	2.04143	0.984771	0.99981	0.815421	0.00077318	0.00083306	0.000774814	00:00:00	499982	00:00:00			3.3198e+08	2022-04-22
2021-03-21	1.66169e+07	0			0.4	15568.7	46556.1	1.99403e+08	2239.73	2.04143		0	2021-03-21	0.600635		0.7	0.00186476	0.00168282	0.000771722	0.000771722	0.510148	0.7	0.399365	0.97144	202900	0.0243025	2.04143	0.984771	0.999822	0.815276	0.000771722	0.000830893	0.000773344	00:00:00	500039	00:00:00			3.31986e+08	2022-04-22
2021-03-22	1.6619e+07	0			0.4	14706.8	43992.1	1.99428e+08	2115.47	2.04143		0	2021-03-22	0.600702		0.7	0.00175892	0.00159012	0.000770266	0.000770266	0.510148	0.7	0.399298	0.97144	203200	0.0243025	2.04143	0.984771	0.999833	0.81514	0.000770266	0.000828733	0.000771878	00:00:00	500093	00:00:00			3.31991e+08	2022-04-22
2021-03-23	1.6621e+07	0			0.4	13892	41566.5	1.99452e+08	1998.02	2.04143		0	2021-03-23	0.600764		0.7	0.00165902	0.00150242	0.000768814	0.000768814	0.510148	0.7	0.399236	0.97144	203500	0.0243025	2.04143	0.984771	0.999844	0.815012	0.000768814	0.00082658	0.000770414	00:00:00	500144	00:00:00			3.31997e+08	2022-04-22
2021-03-24	1.66229e+07	0			0.4	13121.7	39272.2	1.99475e+08	1887.02	2.04143		0	2021-03-24	0.600823		0.7	0.00156472	0.00141947	0.000767366	0.000767366	0.510148	0.7	0.399177	0.97144	203800	0.0243025	2.04143	0.984771	0.999854	0.814893	0.000767366	0.000824433	0.000768955	00:00:00	500192	00:00:00			3.32002e+08	2022-04-22
2021-03-25	1.66247e+07	0			0.4	12393.5	37102.3	1.99496e+08	1782.13	2.04143		0	2021-03-25	0.600877		0.7	0.00147572	0.00134101	0.00076592	0.00076592	0.510148	0.7	0.399123	0.97144	204100	0.0243025	2.04143	0.984771	0.999863	0.814782	0.00076592	0.000822292	0.000767498	00:00:00	500238	00:00:00			3.32008e+08	2022-04-22
2021-03-26	1.66263e+07	0			0.4	11705.4	35050.3	1.99516e+08	1683.01	2.04143		0	2021-03-26	0.600928		0.7	0.00139173	0.00126683	0.000764478	0.000764478	0.510148	0.7	0.399072	0.97144	204400	0.0243025	2.04143	0.984771	0.999872	0.814678	0.000764478	0.000820159	0.000766045	00:00:00	500281	00:00:00			3.32013e+08	2022-04-22
2021-03-27	1.66279e+07	0			0.4	11055	33110.2	1.99535e+08	1589.35	2.04143		0	2021-03-27	0.600976		0.7	0.00131248	0.00119669	0.00076304	0.00076304	0.510148	0.7	0.399024	0.97144	204700	0.0243025	2.04143	0.984771	0.999881	0.814581	0.00076304	0.000818031	0.000764595	00:00:00	500321	00:00:00			3.32019e+08	2022-04-22
2021-03-28	1.66294e+07	0			0.4	10440.4	31275.9	1.99553e+08	1500.86	2.04143		0	2021-03-28	0.60102		0.7	0.0012377	0.00113037	0.000761605	0.000761605	0.510148	0.7	0.39898	0.97144	205000	0.0243025	2.04143	0.984771	0.999889	0.81449	0.000761605	0.000815911	0.000763149	00:00:00	500359	00:00:00			3.32024e+08	2022-04-22
2021-03-29	1.66308e+07	0			0.4	9859.64	29541.9	1.9957e+08	1417.27	2.04143		0	2021-03-29	0.601061		0.7	0.00116714	0.00106768	0.000760173	0.000760173	0.510148	0.7	0.398939	0.97144	205300	0.0243025	2.04143	0.984771	0.999896	0.814406	0.000760173	0.000813796	0.000761706	00:00:00	500396	00:00:00			3.3203e+08	2022-04-22
2021-03-30	1.66322e+07	0			0.4	9310.91	27902.8	1.99586e+08	1338.29	2.04143		0	2021-03-30	0.6011		0.7	0.00110058	0.00100843	0.000758744	0.000758744	0.510148	0.7	0.3989	0.97144	205600	0.0243025	2.04143	0.984771	0.999904	0.814327	0.000758744	0.000811689	0.000760267	00:00:00	500430	00:00:00			3.32035e+08	2022-04-22
2021-03-31	1.66335e+07	0			0.4	8792.47	26353.6	1.99601e+08	1263.69	2.04143		0	2021-03-31	0.601136		0.7	0.00103778	0.000952423	0.000757319	0.000757319	0.510148	0.7	0.398864	0.97144	205900	0.0243025	2.04143	0.984771	0.99991	0.814254	0.000757319	0.000809587	0.000758831	00:00:00	500462	00:00:00			3.32041e+08	2022-04-22
2021-04-01	1.66347e+07	0			0.4	8369.69	24956.5	1.99617e+08	1260.23	2.15607		0	2021-04-01	0.601171		1	0.000986442	0.000901917	0.000755897	0.000755897	0.536194	1	0.398829	0.97144	206200	0.0243025	2.09875	0.984771	0.999911	0.859904	0.000755897	0.000807492	0.000757398	00:00:00	500494	00:00:00			3.32046e+08	2022-04-22
2021-04-02	1.66359e+07	0			0.4	7995.8	23661.7	1.99631e+08	1215.47	2.18473		0	2021-04-02	0.601205		1	0.000941007	0.00085511	0.000754478	0.000754478	0.542278	1	0.398795	0.97144	206500	0.0243025	2.1704	0.984771	0.999915	0.87126	0.000754478	0.000805403	0.000755968	00:00:00	500525	00:00:00			3.32051e+08	2022-04-22
2021-04-03	1.66371e+07	0			0.4	7675.05	22470.6	1.99645e+08	1180.11	2.22056		0	2021-04-03	0.601238		1	0.000901948	0.000812052	0.000753063	0.000753063	0.549663	1	0.398762	0.97144	206800	0.0243025	2.20265	0.984771	0.999918	0.885475	0.000753063	0.000803321	0.000754542	00:00:00	500555	00:00:00			3.32057e+08	2022-04-22
2021-04-04	1.66383e+07	0			0.4	7413.3	21386.4	1.99659e+08	1155.52	2.26534		0	2021-04-04	0.60127		1	0.000869926	0.000772858	0.000751651	0.000751651	0.558566	1	0.39873	0.97144	207100	0.0243025	2.24295	0.984771	0.99992	0.90326	0.000751651	0.000801245	0.000753119	00:00:00	500585	00:00:00			3.32062e+08	2022-04-22
2021-04-05	1.66394e+07	0			0.4	7204.49	20400.4	1.99673e+08	1129.48	2.29266		0	2021-04-05	0.601301		1	0.0008442	0.000737215	0.000750242	0.000750242	0.563825	1	0.398699	0.97144	207400	0.0243025	2.279	0.984771	0.999922	0.914081	0.000750242	0.000799175	0.000751699	00:00:00	500614	00:00:00			3.32068e+08	2022-04-22
2021-04-06	1.66405e+07	0			0.4	7051.3	19512.9	1.99686e+08	1110.5	2.31964		0	2021-04-06	0.601331		1	0.000825056	0.00070513	0.000748836	0.000748836	0.568899	1	0.398669	0.97144	207700	0.0243025	2.30615	0.984771	0.999924	0.924768	0.000748836	0.000797112	0.000750283	00:00:00	500642	00:00:00			3.32073e+08	2022-04-22
2021-04-07	1.66416e+07	0			0.4	6889.48	18724.3	1.99699e+08	1098.41	2.34441		0	2021-04-07	0.601361		1	0.00080496	0.000676621	0.000747434	0.000747434	0.573454	1	0.398639	0.97144	208000	0.0243025	2.33203	0.984771	0.999925	0.934573	0.000747434	0.000795054	0.00074887	00:00:00	500670	00:00:00			3.32079e+08	2022-04-22
2021-04-08	1.66427e+07	0			0.4	6756.18	18024.3	1.99712e+08	1082.17	2.36418		0	2021-04-08	0.60139		1	0.000788248	0.000651317	0.000746034	0.000746034	0.57702	1	0.39861	0.97144	208300	0.0243025	2.35429	0.984771	0.999927	0.942384	0.000746034	0.000793003	0.00074746	00:00:00	500698	00:00:00			3.32084e+08	2022-04-22
2021-04-09	1.66438e+07	0			0.4	6645.25	17410.5	1.99725e+08	1069.18	2.38206		0	2021-04-09	0.601419		1	0.000774191	0.000629126	0.000744638	0.000744638	0.580195	1	0.398581	0.97144	208600	0.0243025	2.37312	0.984771	0.999928	0.949443	0.000744638	0.000790958	0.000746054	00:00:00	500725	00:00:00			3.3209e+08	2022-04-22
2021-04-10	1.66448e+07	0			0.4	6548.17	16879.6	1.99738e+08	1058.44	2.39766		0	2021-04-10	0.601447		1	0.000761785	0.000609931	0.000743246	0.000743246	0.582927	1	0.398553	0.97144	208900	0.0243025	2.38986	0.984771	0.999929	0.955594	0.000743246	0.00078892	0.00074465	00:00:00	500752	00:00:00			3.32095e+08	2022-04-22
2021-04-11	1.66459e+07	0			0.4	6467.38	16427.4	1.9975e+08	1048.69	2.41097		0	2021-04-11	0.601475		1	0.000751307	0.000593583	0.000741856	0.000741856	0.58523	1	0.398525	0.97144	209200	0.0243025	2.40432	0.984771	0.99993	0.960832	0.000741856	0.000786887	0.00074325	00:00:00	500779	00:00:00			3.32101e+08	2022-04-22
2021-04-12	1.66469e+07	0			0.4	6397.58	16050.9	1.99763e+08	1040.7	2.42267		0	2021-04-12	0.601503		1	0.000742135	0.000579966	0.00074047	0.00074047	0.587233	1	0.398497	0.97144	209500	0.0243025	2.41682	0.984771	0.99993	0.965428	0.00074047	0.000784861	0.000741853	00:00:00	500805	00:00:00			3.32106e+08	2022-04-22
2021-04-13	1.66479e+07	0			0.4	6332.89	15746.3	1.99775e+08	1033.72	2.43283		0	2021-04-13	0.601531		1	0.00073358	0.000568952	0.000739086	0.000739086	0.588956	1	0.398469	0.97144	209800	0.0243025	2.42775	0.984771	0.999931	0.969407	0.000739086	0.00078284	0.00074046	00:00:00	500832	00:00:00			3.32111e+08	2022-04-22
2021-04-14	1.6649e+07	0			0.4	6277.61	15509.5	1.99788e+08	1026.89	2.44162		0	2021-04-14	0.601558		1	0.000726138	0.000560386	0.000737706	0.000737706	0.590436	1	0.398442	0.97144	210100	0.0243025	2.43722	0.984771	0.999932	0.972844	0.000737706	0.000780826	0.000739069	00:00:00	500858	00:00:00			3.32117e+08	2022-04-22
2021-04-15	1.665e+07	0			0.4	6229.48	15270.3	1.998e+08	1021.05	2.44928		0	2021-04-15	0.601585		1	0.000719544	0.000551736	0.000736329	0.000736329	0.591717	1	0.398415	0.97144	210400	0.0243025	2.44545	0.984771	0.999932	0.97583	0.000736329	0.000778818	0.000737682	00:00:00	500884	00:00:00			3.32122e+08	2022-04-22
2021-04-16	1.6651e+07	0			0.4	6186.95	15070.7	1.99812e+08	1015.9	2.45593		0	2021-04-16	0.601612		1	0.000713614	0.000544516	0.000734956	0.000734956	0.592822	1	0.398388	0.97144	210700	0.0243025	2.45261	0.984771	0.999933	0.978414	0.000734956	0.000776816	0.000736298	00:00:00	500910	00:00:00			3.32128e+08	2022-04-22
2021-04-17	1.6652e+07	0			0.4	6149.54	14901.9	1.99824e+08	1011.27	2.46171		0	2021-04-17	0.601638		1	0.000708289	0.000538407	0.000733585	0.000733585	0.593778	1	0.398362	0.97144	211000	0.0243025	2.45882	0.984771	0.999933	0.98065	0.000733585	0.000774819	0.000734917	00:00:00	500936	00:00:00			3.32133e+08	2022-04-22
2021-04-18	1.6653e+07	0			0.4	6115.97	14753.5	1.99836e+08	1007.14	2.46673		0	2021-04-18	0.601665		1	0.000703424	0.000533037	0.000732217	0.000732217	0.594605	1	0.398335	0.97144	211300	0.0243025	2.46422	0.984771	0.999933	0.982585	0.000732217	0.000772829	0.000733539	00:00:00	500961	00:00:00			3.32139e+08	2022-04-22
2021-04-19	1.6654e+07	0			0.4	6085.61	14627.4	1.99848e+08	1003.35	2.47109		0	2021-04-19	0.601691		1	0.000698939	0.000528472	0.000730853	0.000730853	0.595321	1	0.398309	0.97144	211600	0.0243025	2.46891	0.984771	0.999934	0.984258	0.000730853	0.000770845	0.000732165	00:00:00	500987	00:00:00			3.32144e+08	2022-04-22
2021-04-20	1.6655e+07	0			0.4	6058.55	14516.7	1.9986e+08	999.832	2.47488		0	2021-04-20	0.601717		1	0.000694846	0.000524465	0.000729492	0.000729492	0.59594	1	0.398283	0.97144	211900	0.0243025	2.47299	0.984771	0.999934	0.985703	0.000729492	0.000768867	0.000730793	00:00:00	501012	00:00:00			3.3215e+08	2022-04-22
2021-04-21	1.6656e+07	0			0.4	6034.15	14415	1.99872e+08	996.646	2.47818		0	2021-04-21	0.601743		1	0.000691069	0.00052078	0.000728134	0.000728134	0.596477	1	0.398257	0.97144	212200	0.0243025	2.47653	0.984771	0.999934	0.98695	0.000728134	0.000766894	0.000729425	00:00:00	501038	00:00:00			3.32155e+08	2022-04-22
2021-04-22	1.6657e+07	0			0.4	6011.95	14326.5	1.99884e+08	993.712	2.48104		0	2021-04-22	0.601769		1	0.000687555	0.000517576	0.000726778	0.000726778	0.596943	1	0.398231	0.97144	212500	0.0243025	2.47961	0.984771	0.999935	0.988025	0.000726778	0.000764928	0.00072806	00:00:00	501063	00:00:00			3.32161e+08	2022-04-22
2021-04-23	1.6658e+07	0			0.4	5991.67	14248.3	1.99896e+08	990.985	2.48352		0	2021-04-23	0.601795		1	0.000684269	0.000514742	0.000725426	0.000725426	0.597346	1	0.398205	0.97144	212800	0.0243025	2.48228	0.984771	0.999935	0.988951	0.000725426	0.000762967	0.000726698	00:00:00	501088	00:00:00			3.32166e+08	2022-04-22
2021-04-24	1.6659e+07	0			0.4	5972.96	14178.3	1.99908e+08	988.436	2.48568		0	2021-04-24	0.601821		1	0.000681173	0.000512205	0.000724077	0.000724077	0.597696	1	0.398179	0.97144	213100	0.0243025	2.4846	0.984771	0.999935	0.989747	0.000724077	0.000761012	0.000725339	00:00:00	501114	00:00:00			3.32172e+08	2022-04-22
2021-04-25	1.666e+07	0			0.4	5955.64	14115.7	1.9992e+08	986.031	2.48756		0	2021-04-25	0.601847		1	0.000678243	0.000509933	0.000722732	0.000722732	0.598	1	0.398153	0.97144	213400	0.0243025	2.48662	0.984771	0.999935	0.99043	0.000722732	0.000759063	0.000723983	00:00:00	501139	00:00:00			3.32177e+08	2022-04-22
2021-04-26	1.6661e+07	0			0.4	5939.56	14058.7	1.99932e+08	983.753	2.48919		0	2021-04-26	0.601873		1	0.000675462	0.000507867	0.000721389	0.000721389	0.598263	1	0.398127	0.97144	213700	0.0243025	2.48838	0.984771	0.999936	0.991016	0.000721389	0.00075712	0.00072263	00:00:00	501164	00:00:00			3.32182e+08	2022-04-22
2021-04-27	1.66619e+07	0			0.4	5924.51	14006.6	1.99943e+08	981.592	2.49061		0	2021-04-27	0.601898		1	0.000672805	0.000505976	0.000720049	0.000720049	0.598492	1	0.398102	0.97144	214000	0.0243025	2.4899	0.984771	0.999936	0.991516	0.000720049	0.000755183	0.000721281	00:00:00	501189	00:00:00			3.32188e+08	2022-04-22
2021-04-28	1.66629e+07	0			0.4	5910.32	13959.2	1.99955e+08	979.525	2.49184		0	2021-04-28	0.601924		1	0.000670255	0.000504257	0.000718712	0.000718712	0.59869	1	0.398076	0.97144	214300	0.0243025	2.49123	0.984771	0.999936	0.991943	0.000718712	0.000753251	0.000719934	00:00:00	501214	00:00:00			3.32193e+08	2022-04-22
2021-04-29	1.66639e+07	0			0.4	5896.87	13915.7	1.99967e+08	977.536	2.49291		0	2021-04-29	0.601949		1	0.000667795	0.000502677	0.000717378	0.000717378	0.598862	1	0.398051	0.97144	214600	0.0243025	2.49238	0.984771	0.999936	0.992305	0.000717378	0.000751325	0.000718591	00:00:00	501239	00:00:00			3.32199e+08	2022-04-22
2021-04-30	1.66649e+07	0			0.4	5884.05	13875.4	1.99978e+08	975.614	2.49384		0	2021-04-30	0.601974		1	0.000665412	0.000501213	0.000716048	0.000716048	0.599012	1	0.398026	0.97144	214900	0.0243025	2.49338	0.984771	0.999936	0.992612	0.000716048	0.000749405	0.00071725	00:00:00	501264	00:00:00			3.32204e+08	2022-04-22
2021-05-01	1.66658e+07	0			0.4	5871.77	13837.9	1.9999e+08	973.745	2.49465		0	2021-05-01	0.602		1	0.000663097	0.000499849	0.00071472	0.00071472	0.599142	1	0.398	0.97144	215200	0.0243025	2.49424	0.984771	0.999936	0.992871	0.00071472	0.000747491	0.000715913	00:00:00	501289	00:00:00			3.3221e+08	2022-04-22
2021-05-02	1.66668e+07	0			0.4	5859.94	13802.7	2.00002e+08	971.924	2.49535		0	2021-05-02	0.602025		1	0.00066084	0.000498569	0.000713395	0.000713395	0.599255	1	0.397975	0.97144	215500	0.0243025	2.495	0.984771	0.999937	0.993087	0.000713395	0.000745582	0.000714578	00:00:00	501313	00:00:00			3.32215e+08	2022-04-22
2021-05-03	1.66678e+07	0			0.4	5848.49	13769.5	2.00013e+08	970.142	2.49596		0	2021-05-03	0.60205		1	0.000658632	0.000497361	0.000712074	0.000712074	0.599352	1	0.39795	0.97144	215800	0.0243025	2.49565	0.984771	0.999937	0.993267	0.000712074	0.000743679	0.000713247	00:00:00	501338	00:00:00			3.32221e+08	2022-04-22
2021-05-04	1.66688e+07	0			0.4	5837.35	13738	2.00025e+08	968.39	2.49649		0	2021-05-04	0.602075		1	0.000656466	0.000496217	0.000710755	0.000710755	0.599437	1	0.397925	0.97144	216100	0.0243025	2.49622	0.984771	0.999937	0.993415	0.000710755	0.000741781	0.000711919	00:00:00	501363	00:00:00			3.32226e+08	2022-04-22
2021-05-05	1.66697e+07	0			0.4	5826.48	13708	2.00037e+08	966.664	2.49695		0	2021-05-05	0.6021		1	0.000654334	0.000495126	0.000709439	0.000709439	0.599511	1	0.3979	0.97144	216400	0.0243025	2.49672	0.984771	0.999937	0.993536	0.000709439	0.00073989	0.000710593	00:00:00	501388	00:00:00			3.32232e+08	2022-04-22
2021-05-06	1.66707e+07	0			0.4	5815.82	13679.3	2.00048e+08	964.957	2.49735		0	2021-05-06	0.602125		1	0.000652234	0.000494079	0.000708126	0.000708126	0.599575	1	0.397875	0.97144	216700	0.0243025	2.49715	0.984771	0.999937	0.993633	0.000708126	0.000738003	0.000709271	00:00:00	501412	00:00:00			3.32237e+08	2022-04-22
2021-05-07	1.66717e+07	0			0.4	5805.34	13651.6	2.0006e+08	963.266	2.4977		0	2021-05-07	0.60215		1	0.000650158	0.00049307	0.000706816	0.000706816	0.599631	1	0.39785	0.97144	217000	0.0243025	2.49752	0.984771	0.999937	0.993709	0.000706816	0.000736123	0.000707952	00:00:00	501437	00:00:00			3.32243e+08	2022-04-22
2021-05-08	1.66726e+07	0			0.4	5795	13624.7	2.00071e+08	961.586	2.498		0	2021-05-08	0.602175		1	0.000648104	0.000492092	0.00070551	0.00070551	0.59968	1	0.397825	0.97144	217300	0.0243025	2.49785	0.984771	0.999938	0.993767	0.00070551	0.000734247	0.000706635	00:00:00	501461	00:00:00			3.32248e+08	2022-04-22
2021-05-09	1.66736e+07	0			0.4	5784.78	13598.6	2.00083e+08	959.915	2.49826		0	2021-05-09	0.6022		1	0.000646069	0.000491141	0.000704206	0.000704206	0.599722	1	0.3978	0.97144	217600	0.0243025	2.49813	0.984771	0.999938	0.993809	0.000704206	0.000732378	0.000705322	00:00:00	501486	00:00:00			3.32253e+08	2022-04-22
2021-05-10	1.66745e+07	0			0.4	5774.64	13573.1	2.00094e+08	958.249	2.49849		0	2021-05-10	0.602224		1	0.000644048	0.000490212	0.000702905	0.000702905	0.599758	1	0.397776	0.97144	217900	0.0243025	2.49838	0.984771	0.999938	0.993838	0.000702905	0.000730514	0.000704011	00:00:00	501510	00:00:00			3.32259e+08	2022-04-22
2021-05-11	1.66755e+07	0			0.4	5764.56	13548.1	2.00106e+08	956.585	2.49869		0	2021-05-11	0.602249		1	0.00064204	0.000489301	0.000701606	0.000701606	0.59979	1	0.397751	0.97144	218200	0.0243025	2.49859	0.984771	0.999938	0.993856	0.000701606	0.000728655	0.000702704	00:00:00	501535	00:00:00			3.32264e+08	2022-04-22
2021-05-12	1.66764e+07	0			0.4	5754.52	13523.5	2.00117e+08	954.922	2.49886		0	2021-05-12	0.602274		1	0.000640042	0.000488404	0.000700311	0.000700311	0.599817	1	0.397726	0.97144	218500	0.0243025	2.49877	0.984771	0.999938	0.993863	0.000700311	0.000726802	0.000701399	00:00:00	501559	00:00:00			3.3227e+08	2022-04-22
2021-05-13	1.66774e+07	0			0.4	5744.51	13499.2	2.00129e+08	953.258	2.49901		0	2021-05-13	0.602298		1	0.000638053	0.000487519	0.000699019	0.000699019	0.599841	1	0.397702	0.97144	218800	0.0243025	2.49893	0.984771	0.999938	0.993861	0.000699019	0.000724954	0.000700098	00:00:00	501583	00:00:00			3.32275e+08	2022-04-22
2021-05-14	1.66783e+07	0			0.4	5734.52	13475.2	2.0014e+08	951.591	2.49914		0	2021-05-14	0.602323		1	0.000636071	0.000486644	0.00069773	0.00069773	0.599862	1	0.397677	0.97144	219100	0.0243025	2.49907	0.984771	0.999938	0.993851	0.00069773	0.000723112	0.000698799	00:00:00	501608	00:00:00			3.32281e+08	2022-04-22
2021-05-15	1.66793e+07	0			0.4	5724.52	13451.4	2.00152e+08	949.919	2.49925		0	2021-05-15	0.602347		1	0.000634094	0.000485775	0.000696443	0.000696443	0.59988	1	0.397653	0.97144	219400	0.0243025	2.4992	0.984771	0.999939	0.993835	0.000696443	0.000721275	0.000697503	00:00:00	501632	00:00:00			3.32286e+08	2022-04-22
2021-05-16	1.66802e+07	0			0.4	5714.52	13427.7	2.00163e+08	948.243	2.49935		0	2021-05-16	0.602371		1	0.000632121	0.000484912	0.000695159	0.000695159	0.599896	1	0.397629	0.97144	219700	0.0243025	2.4993	0.984771	0.999939	0.993813	0.000695159	0.000719444	0.000696211	00:00:00	501656	00:00:00			3.32292e+08	2022-04-22
2021-05-17	1.66812e+07	0			0.4	5704.49	13404.1	2.00174e+08	946.56	2.49944		0	2021-05-17	0.602396		1	0.000630152	0.000484052	0.000693879	0.000693879	0.59991	1	0.397604	0.97144	220000	0.0243025	2.49939	0.984771	0.999939	0.993787	0.000693879	0.000717618	0.000694921	00:00:00	501680	00:00:00			3.32297e+08	2022-04-22
2021-05-18	1.66821e+07	0			0.4	5694.44	13380.6	2.00186e+08	944.869	2.49951		0	2021-05-18	0.60242		1	0.000628185	0.000483195	0.000692601	0.000692601	0.599921	1	0.39758	0.97144	220300	0.0243025	2.49947	0.984771	0.999939	0.993755	0.000692601	0.000715797	0.000693634	00:00:00	501704	00:00:00			3.32303e+08	2022-04-22
2021-05-19	1.66831e+07	0			0.4	5684.35	13357.1	2.00197e+08	943.171	2.49957		0	2021-05-19	0.602444		1	0.000626219	0.000482339	0.000691326	0.000691326	0.599932	1	0.397556	0.97144	220600	0.0243025	2.49954	0.984771	0.999939	0.993721	0.000691326	0.000713981	0.000692349	00:00:00	501728	00:00:00			3.32308e+08	2022-04-22
2021-05-20	1.6684e+07	0			0.4	5674.23	13333.6	2.00208e+08	941.464	2.49963		0	2021-05-20	0.602468		1	0.000624255	0.000481483	0.000690053	0.000690053	0.599941	1	0.397532	0.97144	220900	0.0243025	2.4996	0.984771	0.999939	0.993683	0.000690053	0.000712171	0.000691068	00:00:00	501752	00:00:00			3.32314e+08	2022-04-22
2021-05-21	1.6685e+07	0			0.4	5664.06	13310.1	2.0022e+08	939.748	2.49968		0	2021-05-21	0.602492		1	0.000622291	0.000480625	0.000688784	0.000688784	0.599948	1	0.397508	0.97144	221200	0.0243025	2.49965	0.984771	0.99994	0.993642	0.000688784	0.000710367	0.00068979	00:00:00	501776	00:00:00			3.32319e+08	2022-04-22
2021-05-22	1.66859e+07	0			0.4	5653.84	13286.5	2.00231e+08	938.023	2.49972		0	2021-05-22	0.602516		1	0.000620327	0.000479767	0.000687518	0.000687518	0.599955	1	0.397484	0.97144	221500	0.0243025	2.4997	0.984771	0.99994	0.993599	0.000687518	0.000708567	0.000688514	00:00:00	501800	00:00:00			3.32324e+08	2022-04-22
2021-05-23	1.66868e+07	0			0.4	5643.56	13262.9	2.00242e+08	936.288	2.49976		0	2021-05-23	0.60254		1	0.000618362	0.000478906	0.000686254	0.000686254	0.599961	1	0.39746	0.97144	221800	0.0243025	2.49974	0.984771	0.99994	0.993554	0.000686254	0.000706773	0.000687242	00:00:00	501824	00:00:00			3.3233e+08	2022-04-22
2021-05-24	1.66878e+07	0			0.4	5633.24	13239.2	2.00253e+08	934.542	2.49979		0	2021-05-24	0.602564		1	0.000616397	0.000478042	0.000684993	0.000684993	0.599966	1	0.397436	0.97144	222100	0.0243025	2.49977	0.984771	0.99994	0.993507	0.000684993	0.000704984	0.000685972	00:00:00	501848	00:00:00			3.32335e+08	2022-04-22
2021-05-25	1.66887e+07	0			0.4	5622.85	13215.4	2.00264e+08	932.787	2.49982		0	2021-05-25	0.602588		1	0.000614431	0.000477175	0.000683735	0.000683735	0.599971	1	0.397412	0.97144	222400	0.0243025	2.4998	0.984771	0.99994	0.993458	0.000683735	0.0007032	0.000684705	00:00:00	501872	00:00:00			3.32341e+08	2022-04-22
2021-05-26	1.66896e+07	0			0.4	5612.41	13191.5	2.00276e+08	931.02	2.49984		0	2021-05-26	0.602611		1	0.000612463	0.000476304	0.000682479	0.000682479	0.599974	1	0.397389	0.97144	222700	0.0243025	2.49983	0.984771	0.99994	0.993409	0.000682479	0.000701421	0.000683441	00:00:00	501896	00:00:00			3.32346e+08	2022-04-22
2021-05-27	1.66906e+07	0			0.4	5601.9	13167.5	2.00287e+08	929.244	2.49986		0	2021-05-27	0.602635		1	0.000610494	0.000475429	0.000681227	0.000681227	0.599978	1	0.397365	0.97144	223000	0.0243025	2.49985	0.984771	0.99994	0.993358	0.000681227	0.000699648	0.000682179	00:00:00	501919	00:00:00			3.32352e+08	2022-04-22
2021-05-28	1.66915e+07	0			0.4	5591.34	13143.3	2.00298e+08	927.456	2.49988		0	2021-05-28	0.602658		1	0.000608524	0.00047455	0.000679977	0.000679977	0.599981	1	0.397342	0.97144	223300	0.0243025	2.49987	0.984771	0.999941	0.993306	0.000679977	0.00069788	0.000680921	00:00:00	501943	00:00:00			3.32357e+08	2022-04-22
2021-05-29	1.66924e+07	0			0.4	5580.71	13119.1	2.00309e+08	925.657	2.4999		0	2021-05-29	0.602682		1	0.000606552	0.000473666	0.00067873	0.00067873	0.599983	1	0.397318	0.97144	223600	0.0243025	2.49989	0.984771	0.999941	0.993253	0.00067873	0.000696117	0.000679665	00:00:00	501967	00:00:00			3.32363e+08	2022-04-22
2021-05-30	1.66933e+07	0			0.4	5570.01	13094.7	2.0032e+08	923.848	2.49991		0	2021-05-30	0.602705		1	0.000604579	0.000472777	0.000677486	0.000677486	0.599985	1	0.397295	0.97144	223900	0.0243025	2.4999	0.984771	0.999941	0.9932	0.000677486	0.000694359	0.000678412	00:00:00	501990	00:00:00			3.32368e+08	2022-04-22
2021-05-31	1.66943e+07	0			0.4	5559.25	13070.1	2.00331e+08	922.027	2.49992		0	2021-05-31	0.602729		1	0.000602604	0.000471884	0.000676245	0.000676245	0.599987	1	0.397271	0.97144	224200	0.0243025	2.49992	0.984771	0.999941	0.993147	0.000676245	0.000692606	0.000677162	00:00:00	502014	00:00:00			3.32374e+08	2022-04-22
2021-06-01	1.66952e+07	0			0.4	5548.43	13045.5	2.00342e+08	920.196	2.49993		0	2021-06-01	0.602752		1	0.000600626	0.000470985	0.000675006	0.000675006	0.599989	1	0.397248	0.97144	224500	0.0243025	2.49993	0.984771	0.999941	0.993092	0.000675006	0.000690858	0.000675915	00:00:00	502037	00:00:00			3.32379e+08	2022-04-22
2021-06-02	1.66961e+07	0			0.4	5537.54	13020.7	2.00353e+08	918.353	2.49994		0	2021-06-02	0.602775		1	0.000598648	0.000470082	0.00067377	0.00067377	0.59999	1	0.397225	0.97144	224800	0.0243025	2.49994	0.984771	0.999941	0.993038	0.00067377	0.000689115	0.00067467	00:00:00	502061	00:00:00			3.32385e+08	2022-04-22
2021-06-03	1.6697e+07	0			0.4	5526.58	12995.7	2.00364e+08	916.5	2.49995		0	2021-06-03	0.602799		1	0.000596667	0.000469173	0.000672537	0.000672537	0.599992	1	0.397201	0.97144	225100	0.0243025	2.49994	0.984771	0.999942	0.992983	0.000672537	0.000687378	0.000673428	00:00:00	502084	00:00:00			3.3239e+08	2022-04-22
2021-06-04	1.66979e+07	0			0.4	5515.56	12970.6	2.00375e+08	914.636	2.49996		0	2021-06-04	0.602822		1	0.000594685	0.000468258	0.000671306	0.000671306	0.599993	1	0.397178	0.97144	225400	0.0243025	2.49995	0.984771	0.999942	0.992928	0.000671306	0.000685645	0.000672189	00:00:00	502107	00:00:00			3.32395e+08	2022-04-22
2021-06-05	1.66988e+07	0			0.4	5504.47	12945.3	2.00386e+08	912.761	2.49996		0	2021-06-05	0.602845		1	0.0005927	0.000467339	0.000670078	0.000670078	0.599994	1	0.397155	0.97144	225700	0.0243025	2.49996	0.984771	0.999942	0.992873	0.000670078	0.000683917	0.000670953	00:00:00	502131	00:00:00			3.32401e+08	2022-04-22
2021-06-06	1.66998e+07	0			0.4	5493.32	12919.9	2.00397e+08	910.876	2.49997		0	2021-06-06	0.602868		1	0.000590714	0.000466414	0.000668853	0.000668853	0.599995	1	0.397132	0.97144	226000	0.0243025	2.49996	0.984771	0.999942	0.992817	0.000668853	0.000682195	0.000669719	00:00:00	502154	00:00:00			3.32406e+08	2022-04-22
2021-06-07	1.67007e+07	0			0.4	5482.11	12894.3	2.00408e+08	908.979	2.49997		0	2021-06-07	0.602891		1	0.000588727	0.000465483	0.000667631	0.000667631	0.599995	1	0.397109	0.97144	226300	0.0243025	2.49997	0.984771	0.999942	0.992762	0.000667631	0.000680477	0.000668488	00:00:00	502177	00:00:00			3.32412e+08	2022-04-22
2021-06-08	1.67016e+07	0			0.4	5470.82	12868.6	2.00419e+08	907.072	2.49997		0	2021-06-08	0.602913		1	0.000586737	0.000464547	0.000666411	0.000666411	0.599996	1	0.397087	0.97144	226600	0.0243025	2.49997	0.984771	0.999942	0.992706	0.000666411	0.000678764	0.00066726	00:00:00	502200	00:00:00			3.32417e+08	2022-04-22
2021-06-09	1.67025e+07	0			0.4	5459.48	12842.8	2.0043e+08	905.155	2.49998		0	2021-06-09	0.602936		1	0.000584747	0.000463606	0.000665194	0.000665194	0.599996	1	0.397064	0.97144	226900	0.0243025	2.49998	0.984771	0.999943	0.992651	0.000665194	0.000677057	0.000666035	00:00:00	502223	00:00:00			3.32423e+08	2022-04-22
2021-06-10	1.67034e+07	0			0.4	5448.07	12816.7	2.00441e+08	903.227	2.49998		0	2021-06-10	0.602959		1	0.000582754	0.000462659	0.00066398	0.00066398	0.599997	1	0.397041	0.97144	227200	0.0243025	2.49998	0.984771	0.999943	0.992595	0.00066398	0.000675354	0.000664812	00:00:00	502246	00:00:00			3.32428e+08	2022-04-22
2021-06-11	1.67043e+07	0			0.4	5436.6	12790.6	2.00451e+08	901.289	2.49998		0	2021-06-11	0.602982		1	0.00058076	0.000461707	0.000662768	0.000662768	0.599997	1	0.397018	0.97144	227500	0.0243025	2.49998	0.984771	0.999943	0.99254	0.000662768	0.000673656	0.000663592	00:00:00	502269	00:00:00			3.32434e+08	2022-04-22
2021-06-12	1.67052e+07	0			0.4	5425.06	12764.3	2.00462e+08	899.341	2.49999		0	2021-06-12	0.603004		1	0.000578765	0.000460749	0.000661559	0.000661559	0.599998	1	0.396996	0.97144	227800	0.0243025	2.49998	0.984771	0.999943	0.992484	0.000661559	0.000671963	0.000662375	00:00:00	502292	00:00:00			3.32439e+08	2022-04-22
2021-06-13	1.67061e+07	0			0.4	5413.47	12737.8	2.00473e+08	897.382	2.49999		0	2021-06-13	0.603027		1	0.000576768	0.000459786	0.000660353	0.000660353	0.599998	1	0.396973	0.97144	228100	0.0243025	2.49999	0.984771	0.999943	0.992429	0.000660353	0.000670275	0.00066116	00:00:00	502315	00:00:00			3.32445e+08	2022-04-22
2021-06-14	1.6707e+07	0			0.4	5401.81	12711.2	2.00484e+08	895.414	2.49999		0	2021-06-14	0.603049		1	0.00057477	0.000458818	0.000659149	0.000659149	0.599998	1	0.396951	0.97144	228400	0.0243025	2.49999	0.984771	0.999944	0.992373	0.000659149	0.000668591	0.000659948	00:00:00	502338	00:00:00			3.3245e+08	2022-04-22
2021-06-15	1.67079e+07	0			0.4	5390.09	12684.4	2.00494e+08	893.435	2.49999		0	2021-06-15	0.603071		1	0.00057277	0.000457845	0.000657948	0.000657948	0.599998	1	0.396929	0.97144	228700	0.0243025	2.49999	0.984771	0.999944	0.992318	0.000657948	0.000666913	0.000658739	00:00:00	502361	00:00:00			3.32456e+08	2022-04-22
2021-06-16	1.67088e+07	0			0.4	5378.31	12657.5	2.00505e+08	891.447	2.49999		0	2021-06-16	0.603094		1	0.00057077	0.000456866	0.000656749	0.000656749	0.599999	1	0.396906	0.97144	229000	0.0243025	2.49999	0.984771	0.999944	0.992263	0.000656749	0.000665239	0.000657532	00:00:00	502384	00:00:00			3.32461e+08	2022-04-22
2021-06-17	1.67096e+07	0			0.4	5366.47	12630.5	2.00516e+08	889.45	2.49999		0	2021-06-17	0.603116		1	0.000568768	0.000455882	0.000655554	0.000655554	0.599999	1	0.396884	0.97144	229300	0.0243025	2.49999	0.984771	0.999944	0.992208	0.000655554	0.000663571	0.000656328	00:00:00	502406	00:00:00			3.32467e+08	2022-04-22
2021-06-18	1.67105e+07	0			0.4	5354.57	12603.3	2.00526e+08	887.442	2.49999		0	2021-06-18	0.603138		1	0.000566766	0.000454893	0.00065436	0.00065436	0.599999	1	0.396862	0.97144	229600	0.0243025	2.49999	0.984771	0.999944	0.992153	0.00065436	0.000661907	0.000655127	00:00:00	502429	00:00:00			3.32472e+08	2022-04-22
2021-06-19	1.67114e+07	0			0.4	5342.61	12575.9	2.00537e+08	885.426	2.49999		0	2021-06-19	0.60316		1	0.000564762	0.000453899	0.00065317	0.00065317	0.599999	1	0.39684	0.97144	229900	0.0243025	2.49999	0.984771	0.999944	0.992098	0.00065317	0.000660247	0.000653928	00:00:00	502452	00:00:00			3.32477e+08	2022-04-22
2021-06-20	1.67123e+07	0			0.4	5330.6	12548.5	2.00548e+08	883.4	2.5		0	2021-06-20	0.603182		1	0.000562758	0.0004529	0.000651982	0.000651982	0.599999	1	0.396818	0.97144	230200	0.0243025	2.49999	0.984771	0.999945	0.992043	0.000651982	0.000658593	0.000652732	00:00:00	502474	00:00:00			3.32483e+08	2022-04-22
2021-06-21	1.67132e+07	0			0.4	5318.53	12520.8	2.00558e+08	881.365	2.5		0	2021-06-21	0.603204		1	0.000560753	0.000451896	0.000650797	0.000650797	0.599999	1	0.396796	0.97144	230500	0.0243025	2.5	0.984771	0.999945	0.991989	0.000650797	0.000656943	0.000651539	00:00:00	502497	00:00:00			3.32488e+08	2022-04-22
2021-06-22	1.67141e+07	0			0.4	5306.4	12493.1	2.00569e+08	879.321	2.5		0	2021-06-22	0.603226		1	0.000558747	0.000450887	0.000649614	0.000649614	0.599999	1	0.396774	0.97144	230800	0.0243025	2.5	0.984771	0.999945	0.991935	0.000649614	0.000655298	0.000650348	00:00:00	502519	00:00:00			3.32494e+08	2022-04-22
2021-06-23	1.67149e+07	0			0.4	5294.22	12465.2	2.00579e+08	877.268	2.5		0	2021-06-23	0.603247		1	0.000556741	0.000449873	0.000648433	0.000648433	0.6	1	0.396753	0.97144	231100	0.0243025	2.5	0.984771	0.999945	0.99188	0.000648433	0.000653658	0.00064916	00:00:00	502541	00:00:00			3.32499e+08	2022-04-22
2021-06-24	1.67158e+07	0			0.4	5281.98	12437.2	2.0059e+08	875.206	2.5		0	2021-06-24	0.603269		1	0.000554734	0.000448854	0.000647256	0.000647256	0.6	1	0.396731	0.97144	231400	0.0243025	2.5	0.984771	0.999945	0.991826	0.000647256	0.000652022	0.000647974	00:00:00	502564	00:00:00			3.32505e+08	2022-04-22
2021-06-25	1.67167e+07	0			0.4	5269.69	12409	2.006e+08	873.135	2.5		0	2021-06-25	0.603291		1	0.000552726	0.000447831	0.000646081	0.000646081	0.6	1	0.396709	0.97144	231700	0.0243025	2.5	0.984771	0.999946	0.991773	0.000646081	0.000650391	0.000646791	00:00:00	502586	00:00:00			3.3251e+08	2022-04-22
2021-06-26	1.67176e+07	0			0.4	5257.35	12380.7	2.00611e+08	871.056	2.5		0	2021-06-26	0.603312		1	0.000550719	0.000446803	0.000644908	0.000644908	0.6	1	0.396688	0.97144	232000	0.0243025	2.5	0.984771	0.999946	0.991719	0.000644908	0.000648765	0.000645611	00:00:00	502608	00:00:00			3.32516e+08	2022-04-22
2021-06-27	1.67184e+07	0			0.4	5244.95	12352.3	2.00621e+08	868.969	2.5		0	2021-06-27	0.603334		1	0.000548711	0.00044577	0.000643738	0.000643738	0.6	1	0.396666	0.97144	232300	0.0243025	2.5	0.984771	0.999946	0.991665	0.000643738	0.000647143	0.000644433	00:00:00	502630	00:00:00			3.32521e+08	2022-04-22
2021-06-28	1.67193e+07	0			0.4	5232.51	12323.8	2.00632e+08	866.873	2.5		0	2021-06-28	0.603355		1	0.000546703	0.000444733	0.000642571	0.000642571	0.6	1	0.396645	0.97144	232600	0.0243025	2.5	0.984771	0.999946	0.991612	0.000642571	0.000645526	0.000643258	00:00:00	502653	00:00:00			3.32527e+08	2022-04-22
2021-06-29	1.67202e+07	0			0.4	5220.01	12295.1	2.00642e+08	864.77	2.5		0	2021-06-29	0.603376		1	0.000544694	0.000443691	0.000641406	0.000641406	0.6	1	0.396624	0.97144	232900	0.0243025	2.5	0.984771	0.999946	0.991559	0.000641406	0.000643914	0.000642085	00:00:00	502675	00:00:00			3.32532e+08	2022-04-22
2021-06-30	1.6721e+07	0			0.4	5207.46	12266.3	2.00652e+08	862.658	2.5		0	2021-06-30	0.603397		1	0.000542686	0.000442645	0.000640244	0.000640244	0.6	1	0.396603	0.97144	233200	0.0243025	2.5	0.984771	0.999947	0.991506	0.000640244	0.000642306	0.000640915	00:00:00	502697	00:00:00			3.32538e+08	2022-04-22
2021-07-01	1.67219e+07	0			0.4	5194.86	12237.4	2.00663e+08	860.538	2.5		0	2021-07-01	0.603419		1	0.000540677	0.000441594	0.000639084	0.000639084	0.6	1	0.396581	0.97144	233500	0.0243025	2.5	0.984771	0.999947	0.991453	0.000639084	0.000640702	0.000639747	00:00:00	502719	00:00:00			3.32543e+08	2022-04-22
2021-07-02	1.67227e+07	0			0.4	5182.22	12208.4	2.00673e+08	858.411	2.5		0	2021-07-02	0.60344		1	0.000538669	0.000440539	0.000637926	0.000637926	0.6	1	0.39656	0.97144	233800	0.0243025	2.5	0.984771	0.999947	0.991401	0.000637926	0.000639104	0.000638582	00:00:00	502741	00:00:00			3.32549e+08	2022-04-22
2021-07-03	1.67236e+07	0			0.4	5169.53	12179.2	2.00683e+08	856.276	2.5		0	2021-07-03	0.603461		1	0.000536661	0.00043948	0.000636772	0.000636772	0.6	1	0.396539	0.97144	234100	0.0243025	2.5	0.984771	0.999947	0.991348	0.000636772	0.00063751	0.00063742	00:00:00	502762	00:00:00			3.32554e+08	2022-04-22
2021-07-04	1.67245e+07	0			0.4	5156.79	12150	2.00693e+08	854.134	2.5		0	2021-07-04	0.603481		1	0.000534654	0.000438417	0.000635619	0.000635619	0.6	1	0.396519	0.97144	234400	0.0243025	2.5	0.984771	0.999947	0.991296	0.000635619	0.00063592	0.00063626	00:00:00	502784	00:00:00			3.32559e+08	2022-04-22
2021-07-05	1.67253e+07	0			0.4	5144	12120.6	2.00704e+08	851.984	2.5		0	2021-07-05	0.603502		1	0.000532646	0.00043735	0.000634469	0.000634469	0.6	1	0.396498	0.97144	234700	0.0243025	2.5	0.984771	0.999947	0.991244	0.000634469	0.000634335	0.000635103	00:00:00	502806	00:00:00			3.32565e+08	2022-04-22
2021-07-06	1.67262e+07	0			0.4	5131.17	12091.1	2.00714e+08	849.827	2.5		0	2021-07-06	0.603523		1	0.000530639	0.000436278	0.000633322	0.000633322	0.6	1	0.396477	0.97144	235000	0.0243025	2.5	0.984771	0.999948	0.991192	0.000633322	0.000632754	0.000633948	00:00:00	502828	00:00:00			3.3257e+08	2022-04-22
2021-07-07	1.6727e+07	0			0.4	5118.29	12061.5	2.00724e+08	847.662	2.5		0	2021-07-07	0.603544		1	0.000528633	0.000435203	0.000632177	0.000632177	0.6	1	0.396456	0.97144	235300	0.0243025	2.5	0.984771	0.999948	0.991141	0.000632177	0.000631178	0.000632795	00:00:00	502849	00:00:00			3.32576e+08	2022-04-22
2021-07-08	1.67279e+07	0			0.4	5105.37	12031.8	2.00734e+08	845.491	2.5		0	2021-07-08	0.603564		1	0.000526627	0.000434124	0.000631035	0.000631035	0.6	1	0.396436	0.97144	235600	0.0243025	2.5	0.984771	0.999948	0.991089	0.000631035	0.000629606	0.000631645	00:00:00	502871	00:00:00			3.32581e+08	2022-04-22
2021-07-09	1.67287e+07	0			0.4	5092.41	12002	2.00744e+08	843.313	2.5		0	2021-07-09	0.603585		1	0.000524622	0.000433041	0.000629895	0.000629895	0.6	1	0.396415	0.97144	235900	0.0243025	2.5	0.984771	0.999948	0.991038	0.000629895	0.000628039	0.000630498	00:00:00	502892	00:00:00			3.32587e+08	2022-04-22
2021-07-10	1.67295e+07	0			0.4	5079.41	11972	2.00754e+08	841.129	2.5		0	2021-07-10	0.603605		1	0.000522618	0.000431954	0.000628758	0.000628758	0.6	1	0.396395	0.97144	236200	0.0243025	2.5	0.984771	0.999948	0.990987	0.000628758	0.000626476	0.000629353	00:00:00	502914	00:00:00			3.32592e+08	2022-04-22
2021-07-11	1.67304e+07	0			0.4	5066.36	11942	2.00764e+08	838.937	2.5		0	2021-07-11	0.603626		1	0.000520614	0.000430863	0.000627623	0.000627623	0.6	1	0.396374	0.97144	236500	0.0243025	2.5	0.984771	0.999949	0.990936	0.000627623	0.000624918	0.000628211	00:00:00	502935	00:00:00			3.32598e+08	2022-04-22
2021-07-12	1.67312e+07	0			0.4	5053.27	11911.9	2.00775e+08	836.74	2.5		0	2021-07-12	0.603646		1	0.000518611	0.000429769	0.00062649	0.00062649	0.6	1	0.396354	0.97144	236800	0.0243025	2.5	0.984771	0.999949	0.990885	0.00062649	0.000623364	0.000627071	00:00:00	502957	00:00:00			3.32603e+08	2022-04-22
2021-07-13	1.6732e+07	0			0.4	5040.15	11881.6	2.00785e+08	834.536	2.5		0	2021-07-13	0.603666		1	0.00051661	0.000428671	0.00062536	0.00062536	0.6	1	0.396334	0.97144	237100	0.0243025	2.5	0.984771	0.999949	0.990835	0.00062536	0.000621814	0.000625933	00:00:00	502978	00:00:00			3.32609e+08	2022-04-22
2021-07-14	1.67329e+07	0			0.4	5026.98	11851.3	2.00795e+08	832.325	2.5		0	2021-07-14	0.603686		1	0.000514609	0.000427569	0.000624232	0.000624232	0.6	1	0.396314	0.97144	237400	0.0243025	2.5	0.984771	0.999949	0.990785	0.000624232	0.000620269	0.000624798	00:00:00	502999	00:00:00			3.32614e+08	2022-04-22
2021-07-15	1.67337e+07	0			0.4	5013.78	11820.9	2.00804e+08	830.109	2.5		0	2021-07-15	0.603706		1	0.00051261	0.000426465	0.000623107	0.000623107	0.6	1	0.396294	0.97144	237700	0.0243025	2.5	0.984771	0.999949	0.990735	0.000623107	0.000618728	0.000623665	00:00:00	503020	00:00:00			3.3262e+08	2022-04-22
2021-07-16	1.67345e+07	0			0.4	5000.53	11790.3	2.00814e+08	827.887	2.5		0	2021-07-16	0.603726		1	0.000510611	0.000425356	0.000621984	0.000621984	0.6	1	0.396274	0.97144	238000	0.0243025	2.5	0.984771	0.99995	0.990685	0.000621984	0.000617192	0.000622535	00:00:00	503041	00:00:00			3.32625e+08	2022-04-22
2021-07-17	1.67354e+07	0			0.4	4987.26	11759.7	2.00824e+08	825.659	2.5		0	2021-07-17	0.603746		1	0.000508614	0.000424245	0.000620864	0.000620864	0.6	1	0.396254	0.97144	238300	0.0243025	2.5	0.984771	0.99995	0.990635	0.000620864	0.00061566	0.000621408	00:00:00	503062	00:00:00			3.32631e+08	2022-04-22
2021-07-18	1.67362e+07	0			0.4	4973.94	11729	2.00834e+08	823.425	2.5		0	2021-07-18	0.603766		1	0.000506619	0.00042313	0.000619746	0.000619746	0.6	1	0.396234	0.97144	238600	0.0243025	2.5	0.984771	0.99995	0.990586	0.000619746	0.000614132	0.000620282	00:00:00	503083	00:00:00			3.32636e+08	2022-04-22
2021-07-19	1.6737e+07	0			0.4	4960.59	11698.2	2.00844e+08	821.186	2.5		0	2021-07-19	0.603785		1	0.000504624	0.000422012	0.00061863	0.00061863	0.6	1	0.396215	0.97144	238900	0.0243025	2.5	0.984771	0.99995	0.990536	0.00061863	0.000612608	0.000619159	00:00:00	503104	00:00:00			3.32641e+08	2022-04-22
2021-07-20	1.67378e+07	0			0.4	4947.21	11667.3	2.00854e+08	818.941	2.5		0	2021-07-20	0.603805		1	0.000502632	0.000420891	0.000617517	0.000617517	0.6	1	0.396195	0.97144	239200	0.0243025	2.5	0.984771	0.99995	0.990487	0.000617517	0.000611089	0.000618039	00:00:00	503125	00:00:00			3.32647e+08	2022-04-22
2021-07-21	1.67386e+07	0			0.4	4933.79	11636.4	2.00864e+08	816.691	2.5		0	2021-07-21	0.603825		1	0.00050064	0.000419767	0.000616406	0.000616406	0.6	1	0.396175	0.97144	239500	0.0243025	2.5	0.984771	0.999951	0.990438	0.000616406	0.000609574	0.000616921	00:00:00	503146	00:00:00			3.32652e+08	2022-04-22
2021-07-22	1.67395e+07	0			0.4	4920.34	11605.3	2.00873e+08	814.436	2.5		0	2021-07-22	0.603844		1	0.000498651	0.00041864	0.000615298	0.000615298	0.6	1	0.396156	0.97144	239800	0.0243025	2.5	0.984771	0.999951	0.99039	0.000615298	0.000608063	0.000615805	00:00:00	503167	00:00:00			3.32658e+08	2022-04-22
2021-07-23	1.67403e+07	0			0.4	4906.85	11574.2	2.00883e+08	812.175	2.5		0	2021-07-23	0.603863		1	0.000496663	0.00041751	0.000614191	0.000614191	0.6	1	0.396137	0.97144	240100	0.0243025	2.5	0.984771	0.999951	0.990341	0.000614191	0.000606557	0.000614692	00:00:00	503188	00:00:00			3.32663e+08	2022-04-22
2021-07-24	1.67411e+07	0			0.4	4893.34	11543	2.00893e+08	809.91	2.5		0	2021-07-24	0.603883		1	0.000494677	0.000416377	0.000613088	0.000613088	0.6	1	0.396117	0.97144	240400	0.0243025	2.5	0.984771	0.999951	0.990293	0.000613088	0.000605054	0.000613581	00:00:00	503208	00:00:00			3.32669e+08	2022-04-22
2021-07-25	1.67419e+07	0			0.4	4879.79	11511.7	2.00903e+08	807.64	2.5		0	2021-07-25	0.603902		1	0.000492693	0.000415241	0.000611986	0.000611986	0.6	1	0.396098	0.97144	240700	0.0243025	2.5	0.984771	0.999952	0.990245	0.000611986	0.000603556	0.000612473	00:00:00	503229	00:00:00			3.32674e+08	2022-04-22
2021-07-26	1.67427e+07	0			0.4	4866.22	11480.3	2.00912e+08	805.365	2.5		0	2021-07-26	0.603921		1	0.00049071	0.000414102	0.000610887	0.000610887	0.6	1	0.396079	0.97144	241000	0.0243025	2.5	0.984771	0.999952	0.990197	0.000610887	0.000602062	0.000611367	00:00:00	503249	00:00:00			3.3268e+08	2022-04-22
2021-07-27	1.67435e+07	0			0.4	4852.61	11448.8	2.00922e+08	803.086	2.5		0	2021-07-27	0.60394		1	0.00048873	0.000412961	0.000609791	0.000609791	0.6	1	0.39606	0.97144	241300	0.0243025	2.5	0.984771	0.999952	0.99015	0.000609791	0.000600573	0.000610263	00:00:00	503270	00:00:00			3.32685e+08	2022-04-22
2021-07-28	1.67443e+07	0			0.4	4838.98	11417.3	2.00932e+08	800.802	2.5		0	2021-07-28	0.603959		1	0.000486752	0.000411817	0.000608696	0.000608696	0.6	1	0.396041	0.97144	241600	0.0243025	2.5	0.984771	0.999952	0.990102	0.000608696	0.000599087	0.000609162	00:00:00	503290	00:00:00			3.32691e+08	2022-04-22
2021-07-29	1.67451e+07	0			0.4	4825.32	11385.7	2.00941e+08	798.514	2.5		0	2021-07-29	0.603978		1	0.000484776	0.000410671	0.000607604	0.000607604	0.6	1	0.396022	0.97144	241900	0.0243025	2.5	0.984771	0.999952	0.990055	0.000607604	0.000597606	0.000608063	00:00:00	503311	00:00:00			3.32696e+08	2022-04-22
2021-07-30	1.67459e+07	0			0.4	4811.63	11354.1	2.00951e+08	796.222	2.5		0	2021-07-30	0.603997		1	0.000482802	0.000409522	0.000606515	0.000606515	0.6	1	0.396003	0.97144	242200	0.0243025	2.5	0.984771	0.999953	0.990008	0.000606515	0.000596128	0.000606966	00:00:00	503331	00:00:00			3.32702e+08	2022-04-22
2021-07-31	1.67467e+07	0			0.4	4797.91	11322.3	2.0096e+08	793.925	2.5		0	2021-07-31	0.604015		1	0.00048083	0.000408371	0.000605427	0.000605427	0.6	1	0.395985	0.97144	242500	0.0243025	2.5	0.984771	0.999953	0.989961	0.000605427	0.000594655	0.000605872	00:00:00	503351	00:00:00			3.32707e+08	2022-04-22
2021-08-01	1.67475e+07	0			0.4	4784.17	11290.5	2.0097e+08	791.625	2.5		0	2021-08-01	0.604034		1	0.000478861	0.000407217	0.000604342	0.000604342	0.6	1	0.395966	0.97144	242800	0.0243025	2.5	0.984771	0.999953	0.989915	0.000604342	0.000593186	0.00060478	00:00:00	503372	00:00:00			3.32713e+08	2022-04-22
2021-08-02	1.67483e+07	0			0.4	4770.41	11258.7	2.00979e+08	789.321	2.5		0	2021-08-02	0.604053		1	0.000476894	0.000406061	0.00060326	0.00060326	0.6	1	0.395947	0.97144	243100	0.0243025	2.5	0.984771	0.999953	0.989869	0.00060326	0.000591721	0.000603691	00:00:00	503392	00:00:00			3.32718e+08	2022-04-22
2021-08-03	1.67491e+07	0			0.4	4756.62	11226.7	2.00989e+08	787.013	2.5		0	2021-08-03	0.604071		1	0.000474929	0.000404903	0.000602179	0.000602179	0.6	1	0.395929	0.97144	243400	0.0243025	2.5	0.984771	0.999953	0.989822	0.000602179	0.000590261	0.000602603	00:00:00	503412	00:00:00			3.32723e+08	2022-04-22
2021-08-04	1.67498e+07	0			0.4	4742.81	11194.7	2.00998e+08	784.702	2.5		0	2021-08-04	0.604089		1	0.000472967	0.000403743	0.000601101	0.000601101	0.6	1	0.395911	0.97144	243700	0.0243025	2.5	0.984771	0.999954	0.989777	0.000601101	0.000588804	0.000601519	00:00:00	503432	00:00:00			3.32729e+08	2022-04-22
2021-08-05	1.67506e+07	0			0.4	4728.97	11162.7	2.01007e+08	782.387	2.5		0	2021-08-05	0.604108		1	0.000471008	0.00040258	0.000600025	0.000600025	0.6	1	0.395892	0.97144	244000	0.0243025	2.5	0.984771	0.999954	0.989731	0.000600025	0.000587351	0.000600436	00:00:00	503452	00:00:00			3.32734e+08	2022-04-22
2021-08-06	1.67514e+07	0			0.4	4715.12	11130.6	2.01017e+08	780.068	2.5		0	2021-08-06	0.604126		1	0.000469051	0.000401416	0.000598952	0.000598952	0.6	1	0.395874	0.97144	244300	0.0243025	2.5	0.984771	0.999954	0.989685	0.000598952	0.000585903	0.000599356	00:00:00	503472	00:00:00			3.3274e+08	2022-04-22
2021-08-07	1.67522e+07	0			0.4	4701.24	11098.4	2.01026e+08	777.747	2.5		0	2021-08-07	0.604144		1	0.000467097	0.000400249	0.000597881	0.000597881	0.6	1	0.395856	0.97144	244600	0.0243025	2.5	0.984771	0.999954	0.98964	0.000597881	0.000584458	0.000598278	00:00:00	503492	00:00:00			3.32745e+08	2022-04-22
2021-08-08	1.6753e+07	0			0.4	4687.34	11066.2	2.01035e+08	775.422	2.5		0	2021-08-08	0.604162		1	0.000465145	0.000399081	0.000596812	0.000596812	0.6	1	0.395838	0.97144	244900	0.0243025	2.5	0.984771	0.999954	0.989595	0.000596812	0.000583017	0.000597202	00:00:00	503511	00:00:00			3.32751e+08	2022-04-22
2021-08-09	1.67537e+07	0			0.4	4673.42	11033.9	2.01045e+08	773.094	2.5		0	2021-08-09	0.60418		1	0.000463196	0.00039791	0.000595745	0.000595745	0.6	1	0.39582	0.97144	245200	0.0243025	2.5	0.984771	0.999955	0.98955	0.000595745	0.000581581	0.000596129	00:00:00	503531	00:00:00			3.32756e+08	2022-04-22
2021-08-10	1.67545e+07	0			0.4	4659.48	11001.6	2.01054e+08	770.764	2.5		0	2021-08-10	0.604198		1	0.000461251	0.000396738	0.00059468	0.00059468	0.6	1	0.395802	0.97144	245500	0.0243025	2.5	0.984771	0.999955	0.989505	0.00059468	0.000580148	0.000595057	00:00:00	503551	00:00:00			3.32762e+08	2022-04-22
2021-08-11	1.67553e+07	0			0.4	4645.53	10969.2	2.01063e+08	768.43	2.5		0	2021-08-11	0.604216		1	0.000459308	0.000395564	0.000593618	0.000593618	0.6	1	0.395784	0.97144	245800	0.0243025	2.5	0.984771	0.999955	0.989461	0.000593618	0.00057872	0.000593989	00:00:00	503570	00:00:00			3.32767e+08	2022-04-22
2021-08-12	1.6756e+07	0			0.4	4631.55	10936.8	2.01072e+08	766.094	2.5		0	2021-08-12	0.604233		1	0.000457368	0.000394389	0.000592558	0.000592558	0.6	1	0.395767	0.97144	246100	0.0243025	2.5	0.984771	0.999955	0.989417	0.000592558	0.000577295	0.000592922	00:00:00	503590	00:00:00			3.32773e+08	2022-04-22
2021-08-13	1.67568e+07	0			0.4	4617.56	10904.3	2.01082e+08	763.756	2.5		0	2021-08-13	0.604251		1	0.000455431	0.000393211	0.000591501	0.000591501	0.6	1	0.395749	0.97144	246400	0.0243025	2.5	0.984771	0.999956	0.989373	0.000591501	0.000575874	0.000591858	00:00:00	503609	00:00:00			3.32778e+08	2022-04-22
2021-08-14	1.67576e+07	0			0.4	4603.55	10871.8	2.01091e+08	761.415	2.5		0	2021-08-14	0.604268		1	0.000453498	0.000392033	0.000590445	0.000590445	0.6	1	0.395732	0.97144	246700	0.0243025	2.5	0.984771	0.999956	0.989329	0.000590445	0.000574458	0.000590796	00:00:00	503629	00:00:00			3.32784e+08	2022-04-22
2021-08-15	1.67583e+07	0			0.4	4589.53	10839.3	2.011e+08	759.071	2.5		0	2021-08-15	0.604286		1	0.000451567	0.000390852	0.000589392	0.000589392	0.6	1	0.395714	0.97144	247000	0.0243025	2.5	0.984771	0.999956	0.989285	0.000589392	0.000573045	0.000589736	00:00:00	503648	00:00:00			3.32789e+08	2022-04-22
2021-08-16	1.67591e+07	0			0.4	4575.49	10806.7	2.01109e+08	756.726	2.5		0	2021-08-16	0.604303		1	0.00044964	0.000389671	0.000588341	0.000588341	0.6	1	0.395697	0.97144	247300	0.0243025	2.5	0.984771	0.999956	0.989242	0.000588341	0.000571636	0.000588678	00:00:00	503667	00:00:00			3.32795e+08	2022-04-22
2021-08-17	1.67598e+07	0			0.4	4561.44	10774.1	2.01118e+08	754.378	2.5		0	2021-08-17	0.604321		1	0.000447716	0.000388487	0.000587292	0.000587292	0.6	1	0.395679	0.97144	247600	0.0243025	2.5	0.984771	0.999956	0.989199	0.000587292	0.000570231	0.000587623	00:00:00	503687	00:00:00			3.328e+08	2022-04-22
2021-08-18	1.67606e+07	0			0.4	4547.37	10741.4	2.01127e+08	752.028	2.5		0	2021-08-18	0.604338		1	0.000445795	0.000387303	0.000586245	0.000586245	0.6	1	0.395662	0.97144	247900	0.0243025	2.5	0.984771	0.999957	0.989156	0.000586245	0.00056883	0.00058657	00:00:00	503706	00:00:00			3.32806e+08	2022-04-22
2021-08-19	1.67613e+07	0			0.4	4533.3	10708.7	2.01136e+08	749.677	2.5		0	2021-08-19	0.604355		1	0.000443878	0.000386117	0.000585201	0.000585201	0.6	1	0.395645	0.97144	248200	0.0243025	2.5	0.984771	0.999957	0.989113	0.000585201	0.000567432	0.000585519	00:00:00	503725	00:00:00			3.32811e+08	2022-04-22
2021-08-20	1.67621e+07	0			0.4	4519.2	10675.9	2.01145e+08	747.324	2.5		0	2021-08-20	0.604372		1	0.000441964	0.00038493	0.000584159	0.000584159	0.6	1	0.395628	0.97144	248500	0.0243025	2.5	0.984771	0.999957	0.98907	0.000584159	0.000566039	0.000584471	00:00:00	503744	00:00:00			3.32816e+08	2022-04-22
2021-08-21	1.67628e+07	0			0.4	4505.1	10643.1	2.01154e+08	744.969	2.5		0	2021-08-21	0.604389		1	0.000440053	0.000383742	0.000583119	0.000583119	0.6	1	0.395611	0.97144	248800	0.0243025	2.5	0.984771	0.999957	0.989028	0.000583119	0.000564649	0.000583424	00:00:00	503763	00:00:00			3.32822e+08	2022-04-22
2021-08-22	1.67636e+07	0			0.4	4490.99	10610.3	2.01163e+08	742.612	2.5		0	2021-08-22	0.604406		1	0.000438146	0.000382553	0.000582081	0.000582081	0.6	1	0.395594	0.97144	249100	0.0243025	2.5	0.984771	0.999957	0.988986	0.000582081	0.000563264	0.00058238	00:00:00	503782	00:00:00			3.32827e+08	2022-04-22
2021-08-23	1.67643e+07	0			0.4	4476.86	10577.5	2.01172e+08	740.254	2.5		0	2021-08-23	0.604422		1	0.000436243	0.000381362	0.000581045	0.000581045	0.6	1	0.395578	0.97144	249400	0.0243025	2.5	0.984771	0.999958	0.988944	0.000581045	0.000561882	0.000581338	00:00:00	503801	00:00:00			3.32833e+08	2022-04-22
2021-08-24	1.6765e+07	0			0.4	4462.73	10544.6	2.0118e+08	737.895	2.5		0	2021-08-24	0.604439		1	0.000434343	0.000380171	0.000580012	0.000580012	0.6	1	0.395561	0.97144	249700	0.0243025	2.5	0.984771	0.999958	0.988903	0.000580012	0.000560504	0.000580298	00:00:00	503820	00:00:00			3.32838e+08	2022-04-22
2021-08-25	1.67658e+07	0			0.4	4448.59	10511.7	2.01189e+08	735.534	2.5		0	2021-08-25	0.604456		1	0.000432447	0.000378979	0.000578981	0.000578981	0.6	1	0.395544	0.97144	250000	0.0243025	2.5	0.984771	0.999958	0.988861	0.000578981	0.000559129	0.000579261	00:00:00	503839	00:00:00			3.32844e+08	2022-04-22
2021-08-26	1.67665e+07	0			0.4	4434.44	10478.8	2.01198e+08	733.172	2.5		0	2021-08-26	0.604472		1	0.000430555	0.000377786	0.000577951	0.000577951	0.6	1	0.395528	0.97144	250300	0.0243025	2.5	0.984771	0.999958	0.98882	0.000577951	0.000557759	0.000578225	00:00:00	503857	00:00:00			3.32849e+08	2022-04-22
2021-08-27	1.67672e+07	0			0.4	4420.28	10445.9	2.01207e+08	730.81	2.5		0	2021-08-27	0.604488		1	0.000428666	0.000376592	0.000576925	0.000576925	0.6	1	0.395512	0.97144	250600	0.0243025	2.5	0.984771	0.999959	0.988779	0.000576925	0.000556392	0.000577192	00:00:00	503876	00:00:00			3.32855e+08	2022-04-22
2021-08-28	1.6768e+07	0			0.4	4406.11	10412.9	2.01216e+08	728.446	2.5		0	2021-08-28	0.604505		1	0.000426782	0.000375397	0.0005759	0.0005759	0.6	1	0.395495	0.97144	250900	0.0243025	2.5	0.984771	0.999959	0.988738	0.0005759	0.000555029	0.000576161	00:00:00	503895	00:00:00			3.3286e+08	2022-04-22
2021-08-29	1.67687e+07	0			0.4	4391.94	10379.9	2.01224e+08	726.082	2.5		0	2021-08-29	0.604521		1	0.000424901	0.000374202	0.000574877	0.000574877	0.6	1	0.395479	0.97144	251200	0.0243025	2.5	0.984771	0.999959	0.988697	0.000574877	0.00055367	0.000575132	00:00:00	503913	00:00:00			3.32866e+08	2022-04-22
2021-08-30	1.67694e+07	0			0.4	4377.76	10346.9	2.01233e+08	723.716	2.5		0	2021-08-30	0.604537		1	0.000423024	0.000373005	0.000573857	0.000573857	0.6	1	0.395463	0.97144	251500	0.0243025	2.5	0.984771	0.999959	0.988657	0.000573857	0.000552314	0.000574106	00:00:00	503932	00:00:00			3.32871e+08	2022-04-22
2021-08-31	1.67701e+07	0			0.4	4363.58	10313.9	2.01242e+08	721.351	2.5		0	2021-08-31	0.604553		1	0.000421151	0.000371809	0.000572838	0.000572838	0.6	1	0.395447	0.97144	251800	0.0243025	2.5	0.984771	0.999959	0.988617	0.000572838	0.000550962	0.000573081	00:00:00	503950	00:00:00			3.32877e+08	2022-04-22
2021-09-01	1.67709e+07	0			0.4	4349.39	10280.8	2.0125e+08	718.984	2.5		0	2021-09-01	0.604569		1	0.000419282	0.000370611	0.000571822	0.000571822	0.6	1	0.395431	0.97144	252100	0.0243025	2.5	0.984771	0.99996	0.988577	0.000571822	0.000549614	0.000572059	00:00:00	503968	00:00:00			3.32882e+08	2022-04-22
2021-09-02	1.67716e+07	0			0.4	4335.2	10247.8	2.01259e+08	716.617	2.5		0	2021-09-02	0.604585		1	0.000417417	0.000369414	0.000570808	0.000570808	0.6	1	0.395415	0.97144	252400	0.0243025	2.5	0.984771	0.99996	0.988537	0.000570808	0.00054827	0.000571038	00:00:00	503987	00:00:00			3.32888e+08	2022-04-22
2021-09-03	1.67723e+07	0			0.4	4321	10214.7	2.01267e+08	714.25	2.5		0	2021-09-03	0.604601		1	0.000415556	0.000368215	0.000569796	0.000569796	0.6	1	0.395399	0.97144	252700	0.0243025	2.5	0.984771	0.99996	0.988498	0.000569796	0.000546929	0.00057002	00:00:00	504005	00:00:00			3.32893e+08	2022-04-22
2021-09-04	1.6773e+07	0			0.4	4306.8	10181.6	2.01276e+08	711.883	2.5		0	2021-09-04	0.604617		1	0.0004137	0.000367017	0.000568786	0.000568786	0.6	1	0.395383	0.97144	253000	0.0243025	2.5	0.984771	0.99996	0.988458	0.000568786	0.000545592	0.000569004	00:00:00	504023	00:00:00			3.32899e+08	2022-04-22
2021-09-05	1.67737e+07	0			0.4	4292.6	10148.5	2.01285e+08	709.516	2.5		0	2021-09-05	0.604632		1	0.000411847	0.000365818	0.000567778	0.000567778	0.6	1	0.395368	0.97144	253300	0.0243025	2.5	0.984771	0.99996	0.988419	0.000567778	0.000544259	0.00056799	00:00:00	504041	00:00:00			3.32904e+08	2022-04-22
2021-09-06	1.67744e+07	0			0.4	4278.4	10115.4	2.01293e+08	707.148	2.5		0	2021-09-06	0.604648		1	0.000409999	0.000364618	0.000566772	0.000566772	0.6	1	0.395352	0.97144	253600	0.0243025	2.5	0.984771	0.999961	0.98838	0.000566772	0.000542929	0.000566979	00:00:00	504059	00:00:00			3.32909e+08	2022-04-22
2021-09-07	1.67751e+07	0			0.4	4264.2	10082.3	2.01301e+08	704.781	2.5		0	2021-09-07	0.604663		1	0.000408155	0.000363419	0.000565769	0.000565769	0.6	1	0.395337	0.97144	253900	0.0243025	2.5	0.984771	0.999961	0.988342	0.000565769	0.000541603	0.000565969	00:00:00	504077	00:00:00			3.32915e+08	2022-04-22
2021-09-08	1.67758e+07	0			0.4	4249.99	10049.2	2.0131e+08	702.414	2.5		0	2021-09-08	0.604679		1	0.000406316	0.000362219	0.000564767	0.000564767	0.6	1	0.395321	0.97144	254200	0.0243025	2.5	0.984771	0.999961	0.988303	0.000564767	0.000540281	0.000564962	00:00:00	504095	00:00:00			3.3292e+08	2022-04-22
2021-09-09	1.67765e+07	0			0.4	4235.79	10016	2.01318e+08	700.047	2.5		0	2021-09-09	0.604694		1	0.00040448	0.000361019	0.000563768	0.000563768	0.6	1	0.395306	0.97144	254500	0.0243025	2.5	0.984771	0.999961	0.988265	0.000563768	0.000538962	0.000563956	00:00:00	504113	00:00:00			3.32926e+08	2022-04-22
2021-09-10	1.67772e+07	0			0.4	4221.59	9982.92	2.01327e+08	697.68	2.5		0	2021-09-10	0.604709		1	0.000402649	0.000359819	0.000562771	0.000562771	0.6	1	0.395291	0.97144	254800	0.0243025	2.5	0.984771	0.999962	0.988227	0.000562771	0.000537646	0.000562953	00:00:00	504131	00:00:00			3.32931e+08	2022-04-22
2021-09-11	1.67779e+07	0			0.4	4207.38	9949.78	2.01335e+08	695.314	2.5		0	2021-09-11	0.604724		1	0.000400823	0.000358619	0.000561775	0.000561775	0.6	1	0.395276	0.97144	255100	0.0243025	2.5	0.984771	0.999962	0.988189	0.000561775	0.000536335	0.000561952	00:00:00	504148	00:00:00			3.32937e+08	2022-04-22
2021-09-12	1.67786e+07	0			0.4	4193.18	9916.65	2.01343e+08	692.949	2.5		0	2021-09-12	0.604739		1	0.000399001	0.000357419	0.000560782	0.000560782	0.6	1	0.395261	0.97144	255400	0.0243025	2.5	0.984771	0.999962	0.988152	0.000560782	0.000535027	0.000560953	00:00:00	504166	00:00:00			3.32942e+08	2022-04-22
2021-09-13	1.67793e+07	0			0.4	4178.99	9883.52	2.01352e+08	690.584	2.5		0	2021-09-13	0.604754		1	0.000397184	0.000356219	0.000559791	0.000559791	0.6	1	0.395246	0.97144	255700	0.0243025	2.5	0.984771	0.999962	0.988114	0.000559791	0.000533722	0.000559956	00:00:00	504184	00:00:00			3.32948e+08	2022-04-22
2021-09-14	1.678e+07	0			0.4	4164.79	9850.39	2.0136e+08	688.22	2.5		0	2021-09-14	0.604769		1	0.000395371	0.000355019	0.000558802	0.000558802	0.6	1	0.395231	0.97144	256000	0.0243025	2.5	0.984771	0.999962	0.988077	0.000558802	0.000532421	0.000558961	00:00:00	504201	00:00:00			3.32953e+08	2022-04-22
2021-09-15	1.67807e+07	0			0.4	4150.6	9817.26	2.01368e+08	685.856	2.5		0	2021-09-15	0.604784		1	0.000393562	0.000353819	0.000557815	0.000557815	0.6	1	0.395216	0.97144	256300	0.0243025	2.5	0.984771	0.999963	0.98804	0.000557815	0.000531124	0.000557968	00:00:00	504219	00:00:00			3.32959e+08	2022-04-22
2021-09-16	1.67814e+07	0			0.4	4136.42	9784.14	2.01376e+08	683.494	2.5		0	2021-09-16	0.604799		1	0.000391759	0.000352619	0.00055683	0.00055683	0.6	1	0.395201	0.97144	256600	0.0243025	2.5	0.984771	0.999963	0.988003	0.00055683	0.00052983	0.000556977	00:00:00	504236	00:00:00			3.32964e+08	2022-04-22
2021-09-17	1.6782e+07	0			0.4	4122.23	9751.02	2.01384e+08	681.132	2.5		0	2021-09-17	0.604813		1	0.000389959	0.00035142	0.000555847	0.000555847	0.6	1	0.395187	0.97144	256900	0.0243025	2.5	0.984771	0.999963	0.987967	0.000555847	0.000528539	0.000555989	00:00:00	504254	00:00:00			3.3297e+08	2022-04-22
2021-09-18	1.67827e+07	0			0.4	4108.06	9717.91	2.01393e+08	678.772	2.5		0	2021-09-18	0.604828		1	0.000388165	0.000350221	0.000554866	0.000554866	0.6	1	0.395172	0.97144	257200	0.0243025	2.5	0.984771	0.999963	0.987931	0.000554866	0.000527253	0.000555002	00:00:00	504271	00:00:00			3.32975e+08	2022-04-22
2021-09-19	1.67834e+07	0			0.4	4093.89	9684.8	2.01401e+08	676.413	2.5		0	2021-09-19	0.604842		1	0.000386375	0.000349022	0.000553887	0.000553887	0.6	1	0.395158	0.97144	257500	0.0243025	2.5	0.984771	0.999963	0.987895	0.000553887	0.000525969	0.000554017	00:00:00	504288	00:00:00			3.32981e+08	2022-04-22
2021-09-20	1.67841e+07	0			0.4	4079.72	9651.71	2.01409e+08	674.055	2.5		0	2021-09-20	0.604857		1	0.00038459	0.000347824	0.00055291	0.00055291	0.6	1	0.395143	0.97144	257800	0.0243025	2.5	0.984771	0.999964	0.987859	0.00055291	0.000524689	0.000553035	00:00:00	504305	00:00:00			3.32986e+08	2022-04-22
2021-09-21	1.67847e+07	0			0.4	4065.56	9618.63	2.01417e+08	671.698	2.5		0	2021-09-21	0.604871		1	0.00038281	0.000346626	0.000551936	0.000551936	0.6	1	0.395129	0.97144	258100	0.0243025	2.5	0.984771	0.999964	0.987823	0.000551936	0.000523413	0.000552054	00:00:00	504323	00:00:00			3.32992e+08	2022-04-22
2021-09-22	1.67854e+07	0			0.4	4051.41	9585.55	2.01425e+08	669.343	2.5		0	2021-09-22	0.604885		1	0.000381035	0.000345428	0.000550963	0.000550963	0.6	1	0.395115	0.97144	258400	0.0243025	2.5	0.984771	0.999964	0.987788	0.000550963	0.00052214	0.000551076	00:00:00	504340	00:00:00			3.32997e+08	2022-04-22
2021-09-23	1.67861e+07	0			0.4	4037.27	9552.5	2.01433e+08	666.989	2.5		0	2021-09-23	0.604899		1	0.000379264	0.000344231	0.000549992	0.000549992	0.6	1	0.395101	0.97144	258700	0.0243025	2.5	0.984771	0.999964	0.987752	0.000549992	0.00052087	0.000550099	00:00:00	504357	00:00:00			3.33003e+08	2022-04-22
2021-09-24	1.67867e+07	0			0.4	4023.13	9519.45	2.01441e+08	664.637	2.5		0	2021-09-24	0.604913		1	0.000377499	0.000343035	0.000549023	0.000549023	0.6	1	0.395087	0.97144	259000	0.0243025	2.5	0.984771	0.999965	0.987717	0.000549023	0.000519604	0.000549125	00:00:00	504374	00:00:00			3.33008e+08	2022-04-22
2021-09-25	1.67874e+07	0			0.4	4009.01	9486.43	2.01449e+08	662.286	2.5		0	2021-09-25	0.604927		1	0.000375738	0.000341839	0.000548056	0.000548056	0.6	1	0.395073	0.97144	259300	0.0243025	2.5	0.984771	0.999965	0.987682	0.000548056	0.000518342	0.000548153	00:00:00	504390	00:00:00			3.33013e+08	2022-04-22
2021-09-26	1.67881e+07	0			0.4	3994.89	9453.41	2.01457e+08	659.938	2.5		0	2021-09-26	0.604941		1	0.000373982	0.000340644	0.000547092	0.000547092	0.6	1	0.395059	0.97144	259600	0.0243025	2.5	0.984771	0.999965	0.987648	0.000547092	0.000517083	0.000547182	00:00:00	504407	00:00:00			3.33019e+08	2022-04-22
2021-09-27	1.67887e+07	0			0.4	3980.78	9420.42	2.01465e+08	657.591	2.5		0	2021-09-27	0.604955		1	0.000372232	0.00033945	0.000546129	0.000546129	0.6	1	0.395045	0.97144	259900	0.0243025	2.5	0.984771	0.999965	0.987614	0.000546129	0.000515827	0.000546214	00:00:00	504424	00:00:00			3.33024e+08	2022-04-22
2021-09-28	1.67894e+07	0			0.4	3966.69	9387.45	2.01473e+08	655.246	2.5		0	2021-09-28	0.604968		1	0.000370486	0.000338256	0.000545168	0.000545168	0.6	1	0.395032	0.97144	260200	0.0243025	2.5	0.984771	0.999965	0.987579	0.000545168	0.000514574	0.000545247	00:00:00	504441	00:00:00			3.3303e+08	2022-04-22
2021-09-29	1.679e+07	0			0.4	3952.6	9354.5	2.0148e+08	652.903	2.5		0	2021-09-29	0.604982		1	0.000368745	0.000337063	0.000544209	0.000544209	0.6	1	0.395018	0.97144	260500	0.0243025	2.5	0.984771	0.999966	0.987545	0.000544209	0.000513325	0.000544283	00:00:00	504457	00:00:00			3.33035e+08	2022-04-22
2021-09-30	1.67907e+07	0			0.4	3938.53	9321.56	2.01488e+08	650.562	2.5		0	2021-09-30	0.604995		1	0.000367009	0.000335871	0.000543252	0.000543252	0.6	1	0.395005	0.97144	260800	0.0243025	2.5	0.984771	0.999966	0.987512	0.000543252	0.00051208	0.000543321	00:00:00	504474	00:00:00			3.33041e+08	2022-04-22
2021-10-01	1.67913e+07	0			0.4	3924.46	9288.65	2.01496e+08	648.223	2.5		0	2021-10-01	0.605009		1	0.000365279	0.00033468	0.000542297	0.000542297	0.6	1	0.394991	0.97144	261100	0.0243025	2.5	0.984771	0.999966	0.987478	0.000542297	0.000510837	0.00054236	00:00:00	504491	00:00:00			3.33046e+08	2022-04-22
2021-10-02	1.6792e+07	0			0.4	3910.41	9255.77	2.01504e+08	645.887	2.5		0	2021-10-02	0.605022		1	0.000363553	0.000333489	0.000541344	0.000541344	0.6	1	0.394978	0.97144	261400	0.0243025	2.5	0.984771	0.999966	0.987445	0.000541344	0.000509599	0.000541402	00:00:00	504507	00:00:00			3.33052e+08	2022-04-22
2021-10-03	1.67926e+07	0			0.4	3896.37	9222.91	2.01511e+08	643.553	2.5		0	2021-10-03	0.605035		1	0.000361833	0.0003323	0.000540393	0.000540393	0.6	1	0.394965	0.97144	261700	0.0243025	2.5	0.984771	0.999966	0.987412	0.000540393	0.000508363	0.000540446	00:00:00	504524	00:00:00			3.33057e+08	2022-04-22
2021-10-04	1.67933e+07	0			0.4	3882.35	9190.08	2.01519e+08	641.221	2.5		0	2021-10-04	0.605048		1	0.000360117	0.000331112	0.000539444	0.000539444	0.6	1	0.394952	0.97144	262000	0.0243025	2.5	0.984771	0.999967	0.987379	0.000539444	0.000507131	0.000539491	00:00:00	504540	00:00:00			3.33063e+08	2022-04-22
2021-10-05	1.67939e+07	0			0.4	3868.34	9157.27	2.01527e+08	638.892	2.5		0	2021-10-05	0.605062		1	0.000358407	0.000329924	0.000538497	0.000538497	0.6	1	0.394938	0.97144	262300	0.0243025	2.5	0.984771	0.999967	0.987346	0.000538497	0.000505902	0.000538539	00:00:00	504556	00:00:00			3.33068e+08	2022-04-22
2021-10-06	1.67945e+07	0			0.4	3854.34	9124.49	2.01534e+08	636.565	2.5		0	2021-10-06	0.605075		1	0.000356703	0.000328738	0.000537552	0.000537552	0.6	1	0.394925	0.97144	262600	0.0243025	2.5	0.984771	0.999967	0.987314	0.000537552	0.000504676	0.000537588	00:00:00	504572	00:00:00			3.33074e+08	2022-04-22
2021-10-07	1.67952e+07	0			0.4	3840.36	9091.74	2.01542e+08	634.24	2.5		0	2021-10-07	0.605087		1	0.000355003	0.000327553	0.000536609	0.000536609	0.6	1	0.394913	0.97144	262900	0.0243025	2.5	0.984771	0.999967	0.987281	0.000536609	0.000503454	0.00053664	00:00:00	504589	00:00:00			3.33079e+08	2022-04-22
2021-10-08	1.67958e+07	0			0.4	3826.39	9059.03	2.0155e+08	631.919	2.5		0	2021-10-08	0.6051		1	0.000353309	0.000326368	0.000535668	0.000535668	0.6	1	0.3949	0.97144	263200	0.0243025	2.5	0.984771	0.999968	0.987249	0.000535668	0.000502235	0.000535693	00:00:00	504605	00:00:00			3.33085e+08	2022-04-22
2021-10-09	1.67964e+07	0			0.4	3812.44	9026.34	2.01557e+08	629.6	2.5		0	2021-10-09	0.605113		1	0.000351619	0.000325185	0.000534728	0.000534728	0.6	1	0.394887	0.97144	263500	0.0243025	2.5	0.984771	0.999968	0.987218	0.000534728	0.000501019	0.000534748	00:00:00	504621	00:00:00			3.3309e+08	2022-04-22
2021-10-10	1.67971e+07	0			0.4	3798.5	8993.69	2.01565e+08	627.284	2.5		0	2021-10-10	0.605126		1	0.000349936	0.000324004	0.000533791	0.000533791	0.6	1	0.394874	0.97144	263800	0.0243025	2.5	0.984771	0.999968	0.987186	0.000533791	0.000499807	0.000533806	00:00:00	504637	00:00:00			3.33096e+08	2022-04-22
2021-10-11	1.67977e+07	0			0.4	3784.58	8961.07	2.01572e+08	624.971	2.5		0	2021-10-11	0.605138		1	0.000348257	0.000322823	0.000532855	0.000532855	0.6	1	0.394862	0.97144	264100	0.0243025	2.5	0.984771	0.999968	0.987154	0.000532855	0.000498597	0.000532865	00:00:00	504653	00:00:00			3.33101e+08	2022-04-22
2021-10-12	1.67983e+07	0			0.4	3770.67	8928.48	2.0158e+08	622.661	2.5		0	2021-10-12	0.605151		1	0.000346584	0.000321644	0.000531922	0.000531922	0.6	1	0.394849	0.97144	264400	0.0243025	2.5	0.984771	0.999968	0.987123	0.000531922	0.000497391	0.000531926	00:00:00	504669	00:00:00			3.33107e+08	2022-04-22
2021-10-13	1.67989e+07	0			0.4	3756.79	8895.93	2.01587e+08	620.353	2.5		0	2021-10-13	0.605163		1	0.000344916	0.000320466	0.00053099	0.00053099	0.6	1	0.394837	0.97144	264700	0.0243025	2.5	0.984771	0.999969	0.987092	0.00053099	0.000496189	0.000530989	00:00:00	504684	00:00:00			3.33112e+08	2022-04-22
2021-10-14	1.67995e+07	0			0.4	3742.92	8863.42	2.01595e+08	618.049	2.5		0	2021-10-14	0.605175		1	0.000343254	0.00031929	0.00053006	0.00053006	0.6	1	0.394825	0.97144	265000	0.0243025	2.5	0.984771	0.999969	0.987061	0.00053006	0.000494989	0.000530054	00:00:00	504700	00:00:00			3.33118e+08	2022-04-22
2021-10-15	1.68002e+07	0			0.4	3729.07	8830.94	2.01602e+08	615.748	2.5		0	2021-10-15	0.605188		1	0.000341597	0.000318115	0.000529133	0.000529133	0.6	1	0.394812	0.97144	265300	0.0243025	2.5	0.984771	0.999969	0.987031	0.000529133	0.000493793	0.000529121	00:00:00	504716	00:00:00			3.33123e+08	2022-04-22
2021-10-16	1.68008e+07	0			0.4	3715.23	8798.51	2.01609e+08	613.451	2.5		0	2021-10-16	0.6052		1	0.000339945	0.000316941	0.000528207	0.000528207	0.6	1	0.3948	0.97144	265600	0.0243025	2.5	0.984771	0.999969	0.987001	0.000528207	0.0004926	0.00052819	00:00:00	504732	00:00:00			3.33128e+08	2022-04-22
2021-10-17	1.68014e+07	0			0.4	3701.42	8766.11	2.01617e+08	611.156	2.5		0	2021-10-17	0.605212		1	0.000338299	0.000315769	0.000527283	0.000527283	0.6	1	0.394788	0.97144	265900	0.0243025	2.5	0.984771	0.999969	0.98697	0.000527283	0.00049141	0.000527261	00:00:00	504747	00:00:00			3.33134e+08	2022-04-22
2021-10-18	1.6802e+07	0			0.4	3687.62	8733.75	2.01624e+08	608.865	2.5		0	2021-10-18	0.605224		1	0.000336658	0.000314598	0.00052636	0.00052636	0.6	1	0.394776	0.97144	266200	0.0243025	2.5	0.984771	0.99997	0.98694	0.00052636	0.000490223	0.000526333	00:00:00	504763	00:00:00			3.33139e+08	2022-04-22
2021-10-19	1.68026e+07	0			0.4	3673.85	8701.44	2.01631e+08	606.577	2.5		0	2021-10-19	0.605236		1	0.000335023	0.000313429	0.00052544	0.00052544	0.6	1	0.394764	0.97144	266500	0.0243025	2.5	0.984771	0.99997	0.986911	0.00052544	0.00048904	0.000525408	00:00:00	504778	00:00:00			3.33145e+08	2022-04-22
2021-10-20	1.68032e+07	0			0.4	3660.09	8669.17	2.01638e+08	604.293	2.5		0	2021-10-20	0.605248		1	0.000333393	0.000312261	0.000524522	0.000524522	0.6	1	0.394752	0.97144	266800	0.0243025	2.5	0.984771	0.99997	0.986881	0.000524522	0.000487859	0.000524484	00:00:00	504794	00:00:00			3.3315e+08	2022-04-22
2021-10-21	1.68038e+07	0			0.4	3646.36	8636.94	2.01646e+08	602.012	2.5		0	2021-10-21	0.605259		1	0.000331769	0.000311096	0.000523605	0.000523605	0.6	1	0.394741	0.97144	267100	0.0243025	2.5	0.984771	0.99997	0.986852	0.000523605	0.000486682	0.000523563	00:00:00	504809	00:00:00			3.33156e+08	2022-04-22
2021-10-22	1.68044e+07	0			0.4	3632.64	8604.76	2.01653e+08	599.735	2.5		0	2021-10-22	0.605271		1	0.00033015	0.000309931	0.00052269	0.00052269	0.6	1	0.394729	0.97144	267400	0.0243025	2.5	0.984771	0.99997	0.986823	0.00052269	0.000485508	0.000522643	00:00:00	504824	00:00:00			3.33161e+08	2022-04-22
2021-10-23	1.6805e+07	0			0.4	3618.95	8572.62	2.0166e+08	597.462	2.5		0	2021-10-23	0.605283		1	0.000328537	0.000308769	0.000521777	0.000521777	0.6	1	0.394717	0.97144	267700	0.0243025	2.5	0.984771	0.999971	0.986794	0.000521777	0.000484337	0.000521725	00:00:00	504840	00:00:00			3.33167e+08	2022-04-22
2021-10-24	1.68056e+07	0			0.4	3605.27	8540.53	2.01667e+08	595.192	2.5		0	2021-10-24	0.605294		1	0.00032693	0.000307608	0.000520866	0.000520866	0.6	1	0.394706	0.97144	268000	0.0243025	2.5	0.984771	0.999971	0.986765	0.000520866	0.000483169	0.000520809	00:00:00	504855	00:00:00			3.33172e+08	2022-04-22
2021-10-25	1.68062e+07	0			0.4	3591.62	8508.48	2.01674e+08	592.926	2.5		0	2021-10-25	0.605305		1	0.000325327	0.000306448	0.000519957	0.000519957	0.6	1	0.394695	0.97144	268300	0.0243025	2.5	0.984771	0.999971	0.986736	0.000519957	0.000482004	0.000519895	00:00:00	504870	00:00:00			3.33178e+08	2022-04-22
2021-10-26	1.68068e+07	0			0.4	3577.99	8476.49	2.01681e+08	590.664	2.5		0	2021-10-26	0.605317		1	0.000323731	0.000305291	0.00051905	0.00051905	0.6	1	0.394683	0.97144	268600	0.0243025	2.5	0.984771	0.999971	0.986708	0.00051905	0.000480843	0.000518983	00:00:00	504885	00:00:00			3.33183e+08	2022-04-22
2021-10-27	1.68074e+07	0			0.4	3564.38	8444.54	2.01688e+08	588.406	2.5		0	2021-10-27	0.605328		1	0.00032214	0.000304135	0.000518145	0.000518145	0.6	1	0.394672	0.97144	268900	0.0243025	2.5	0.984771	0.999972	0.98668	0.000518145	0.000479684	0.000518072	00:00:00	504900	00:00:00			3.33189e+08	2022-04-22
2021-10-28	1.6808e+07	0			0.4	3550.8	8412.64	2.01695e+08	586.151	2.5		0	2021-10-28	0.605339		1	0.000320555	0.000302981	0.000517241	0.000517241	0.6	1	0.394661	0.97144	269200	0.0243025	2.5	0.984771	0.999972	0.986652	0.000517241	0.000478529	0.000517164	00:00:00	504915	00:00:00			3.33194e+08	2022-04-22
2021-10-29	1.68085e+07	0			0.4	3537.24	8380.79	2.01702e+08	583.901	2.5		0	2021-10-29	0.60535		1	0.000318975	0.00030183	0.000516339	0.000516339	0.6	1	0.39465	0.97144	269500	0.0243025	2.5	0.984771	0.999972	0.986624	0.000516339	0.000477377	0.000516257	00:00:00	504930	00:00:00			3.332e+08	2022-04-22
2021-10-30	1.68091e+07	0			0.4	3523.7	8349	2.01709e+08	581.655	2.5		0	2021-10-30	0.605361		1	0.000317401	0.000300679	0.000515439	0.000515439	0.6	1	0.394639	0.97144	269800	0.0243025	2.5	0.984771	0.999972	0.986597	0.000515439	0.000476227	0.000515352	00:00:00	504945	00:00:00			3.33205e+08	2022-04-22
2021-10-31	1.68097e+07	0			0.4	3510.19	8317.25	2.01716e+08	579.412	2.5		0	2021-10-31	0.605372		1	0.000315832	0.000299531	0.000514541	0.000514541	0.6	1	0.394628	0.97144	270100	0.0243025	2.5	0.984771	0.999972	0.98657	0.000514541	0.000475081	0.000514449	00:00:00	504959	00:00:00			3.33211e+08	2022-04-22
2021-11-01	1.68103e+07	0			0.4	3496.7	8285.56	2.01723e+08	577.174	2.5		0	2021-11-01	0.605383		1	0.00031427	0.000298385	0.000513645	0.000513645	0.6	1	0.394617	0.97144	270400	0.0243025	2.5	0.984771	0.999973	0.986543	0.000513645	0.000473938	0.000513548	00:00:00	504974	00:00:00			3.33216e+08	2022-04-22
2021-11-02	1.68109e+07	0			0.4	3483.23	8253.92	2.0173e+08	574.94	2.5		0	2021-11-02	0.605394		1	0.000312713	0.000297241	0.00051275	0.00051275	0.6	1	0.394606	0.97144	270700	0.0243025	2.5	0.984771	0.999973	0.986516	0.00051275	0.000472798	0.000512649	00:00:00	504989	00:00:00			3.33222e+08	2022-04-22
2021-11-03	1.68114e+07	0			0.4	3469.79	8222.34	2.01737e+08	572.711	2.5		0	2021-11-03	0.605404		1	0.000311161	0.000296099	0.000511858	0.000511858	0.6	1	0.394596	0.97144	271000	0.0243025	2.5	0.984771	0.999973	0.986489	0.000511858	0.000471661	0.000511751	00:00:00	505003	00:00:00			3.33227e+08	2022-04-22
2021-11-04	1.6812e+07	0			0.4	3456.38	8190.81	2.01744e+08	570.485	2.5		0	2021-11-04	0.605415		1	0.000309615	0.000294959	0.000510967	0.000510967	0.6	1	0.394585	0.97144	271300	0.0243025	2.5	0.984771	0.999973	0.986463	0.000510967	0.000470527	0.000510855	00:00:00	505018	00:00:00			3.33233e+08	2022-04-22
2021-11-05	1.68126e+07	0			0.4	3442.99	8159.34	2.01751e+08	568.265	2.5		0	2021-11-05	0.605425		1	0.000308075	0.00029382	0.000510078	0.000510078	0.6	1	0.394575	0.97144	271600	0.0243025	2.5	0.984771	0.999973	0.986436	0.000510078	0.000469396	0.000509961	00:00:00	505033	00:00:00			3.33238e+08	2022-04-22
2021-11-06	1.68131e+07	0			0.4	3429.62	8127.93	2.01758e+08	566.048	2.5		0	2021-11-06	0.605436		1	0.000306541	0.000292684	0.00050919	0.00050919	0.6	1	0.394564	0.97144	271900	0.0243025	2.5	0.984771	0.999974	0.98641	0.00050919	0.000468268	0.000509069	00:00:00	505047	00:00:00			3.33243e+08	2022-04-22
2021-11-07	1.68137e+07	0			0.4	3416.28	8096.57	2.01764e+08	563.836	2.5		0	2021-11-07	0.605446		1	0.000305012	0.00029155	0.000508305	0.000508305	0.6	1	0.394554	0.97144	272200	0.0243025	2.5	0.984771	0.999974	0.986384	0.000508305	0.000467143	0.000508179	00:00:00	505061	00:00:00			3.33249e+08	2022-04-22
2021-11-08	1.68143e+07	0			0.4	3402.97	8065.28	2.01771e+08	561.628	2.5		0	2021-11-08	0.605457		1	0.000303489	0.000290419	0.000507421	0.000507421	0.6	1	0.394543	0.97144	272500	0.0243025	2.5	0.984771	0.999974	0.986359	0.000507421	0.000466021	0.000507291	00:00:00	505076	00:00:00			3.33254e+08	2022-04-22
2021-11-09	1.68148e+07	0			0.4	3389.69	8034.04	2.01778e+08	559.425	2.5		0	2021-11-09	0.605467		1	0.000301972	0.000289289	0.000506539	0.000506539	0.6	1	0.394533	0.97144	272800	0.0243025	2.5	0.984771	0.999974	0.986333	0.000506539	0.000464902	0.000506404	00:00:00	505090	00:00:00			3.3326e+08	2022-04-22
2021-11-10	1.68154e+07	0			0.4	3376.43	8002.86	2.01784e+08	557.227	2.5		0	2021-11-10	0.605477		1	0.00030046	0.000288162	0.000505659	0.000505659	0.6	1	0.394523	0.97144	273100	0.0243025	2.5	0.984771	0.999974	0.986308	0.000505659	0.000463785	0.000505519	00:00:00	505104	00:00:00			3.33265e+08	2022-04-22
2021-11-11	1.68159e+07	0			0.4	3363.2	7971.74	2.01791e+08	555.033	2.5		0	2021-11-11	0.605487		1	0.000298954	0.000287036	0.000504781	0.000504781	0.6	1	0.394513	0.97144	273400	0.0243025	2.5	0.984771	0.999975	0.986283	0.000504781	0.000462672	0.000504636	00:00:00	505118	00:00:00			3.33271e+08	2022-04-22
2021-11-12	1.68165e+07	0			0.4	3349.99	7940.68	2.01798e+08	552.844	2.5		0	2021-11-12	0.605497		1	0.000297454	0.000285913	0.000503904	0.000503904	0.6	1	0.394503	0.97144	273700	0.0243025	2.5	0.984771	0.999975	0.986258	0.000503904	0.000461562	0.000503755	00:00:00	505132	00:00:00			3.33276e+08	2022-04-22
2021-11-13	1.6817e+07	0			0.4	3336.82	7909.69	2.01804e+08	550.66	2.5		0	2021-11-13	0.605507		1	0.00029596	0.000284793	0.000503029	0.000503029	0.6	1	0.394493	0.97144	274000	0.0243025	2.5	0.984771	0.999975	0.986233	0.000503029	0.000460455	0.000502875	00:00:00	505147	00:00:00			3.33282e+08	2022-04-22
2021-11-14	1.68176e+07	0			0.4	3323.67	7878.76	2.01811e+08	548.48	2.5		0	2021-11-14	0.605517		1	0.000294471	0.000283674	0.000502156	0.000502156	0.6	1	0.394483	0.97144	274300	0.0243025	2.5	0.984771	0.999975	0.986209	0.000502156	0.00045935	0.000501997	00:00:00	505161	00:00:00			3.33287e+08	2022-04-22
2021-11-15	1.68181e+07	0			0.4	3310.55	7847.89	2.01818e+08	546.305	2.5		0	2021-11-15	0.605526		1	0.000292988	0.000282558	0.000501285	0.000501285	0.6	1	0.394474	0.97144	274600	0.0243025	2.5	0.984771	0.999975	0.986184	0.000501285	0.000458249	0.000501122	00:00:00	505174	00:00:00			3.33293e+08	2022-04-22
2021-11-16	1.68187e+07	0			0.4	3297.46	7817.08	2.01824e+08	544.135	2.5		0	2021-11-16	0.605536		1	0.000291511	0.000281445	0.000500415	0.000500415	0.6	1	0.394464	0.97144	274900	0.0243025	2.5	0.984771	0.999976	0.98616	0.000500415	0.00045715	0.000500247	00:00:00	505188	00:00:00			3.33298e+08	2022-04-22
2021-11-17	1.68192e+07	0			0.4	3284.39	7786.34	2.01831e+08	541.97	2.5		0	2021-11-17	0.605545		1	0.00029004	0.000280333	0.000499547	0.000499547	0.6	1	0.394455	0.97144	275200	0.0243025	2.5	0.984771	0.999976	0.986136	0.000499547	0.000456055	0.000499375	00:00:00	505202	00:00:00			3.33304e+08	2022-04-22
2021-11-18	1.68198e+07	0			0.4	3271.36	7755.67	2.01837e+08	539.81	2.5		0	2021-11-18	0.605555		1	0.000288574	0.000279224	0.000498681	0.000498681	0.6	1	0.394445	0.97144	275500	0.0243025	2.5	0.984771	0.999976	0.986113	0.000498681	0.000454962	0.000498504	00:00:00	505216	00:00:00			3.33309e+08	2022-04-22
2021-11-19	1.68203e+07	0			0.4	3258.36	7725.06	2.01843e+08	537.655	2.5		0	2021-11-19	0.605564		1	0.000287115	0.000278118	0.000497817	0.000497817	0.6	1	0.394436	0.97144	275800	0.0243025	2.5	0.984771	0.999976	0.986089	0.000497817	0.000453872	0.000497635	00:00:00	505230	00:00:00			3.33315e+08	2022-04-22
2021-11-20	1.68208e+07	0			0.4	3245.38	7694.51	2.0185e+08	535.505	2.5		0	2021-11-20	0.605574		1	0.00028566	0.000277013	0.000496954	0.000496954	0.6	1	0.394426	0.97144	276100	0.0243025	2.5	0.984771	0.999976	0.986066	0.000496954	0.000452785	0.000496768	00:00:00	505243	00:00:00			3.3332e+08	2022-04-22
2021-11-21	1.68214e+07	0			0.4	3232.44	7664.04	2.01856e+08	533.36	2.5		0	2021-11-21	0.605583		1	0.000284212	0.000275912	0.000496093	0.000496093	0.6	1	0.394417	0.97144	276400	0.0243025	2.5	0.984771	0.999977	0.986043	0.000496093	0.000451701	0.000495903	00:00:00	505257	00:00:00			3.33326e+08	2022-04-22
2021-11-22	1.68219e+07	0			0.4	3219.52	7633.63	2.01863e+08	531.22	2.5		0	2021-11-22	0.605592		1	0.00028277	0.000274812	0.000495234	0.000495234	0.6	1	0.394408	0.97144	276700	0.0243025	2.5	0.984771	0.999977	0.98602	0.000495234	0.00045062	0.000495039	00:00:00	505270	00:00:00			3.33331e+08	2022-04-22
2021-11-23	1.68224e+07	0			0.4	3206.64	7603.29	2.01869e+08	529.085	2.5		0	2021-11-23	0.605601		1	0.000281333	0.000273716	0.000494377	0.000494377	0.6	1	0.394399	0.97144	277000	0.0243025	2.5	0.984771	0.999977	0.985997	0.000494377	0.000449541	0.000494177	00:00:00	505284	00:00:00			3.33337e+08	2022-04-22
2021-11-24	1.68229e+07	0			0.4	3193.78	7573.02	2.01875e+08	526.956	2.5		0	2021-11-24	0.60561		1	0.000279902	0.000272621	0.000493521	0.000493521	0.6	1	0.39439	0.97144	277300	0.0243025	2.5	0.984771	0.999977	0.985975	0.000493521	0.000448466	0.000493317	00:00:00	505297	00:00:00			3.33342e+08	2022-04-22
2021-11-25	1.68235e+07	0			0.4	3180.96	7542.82	2.01882e+08	524.831	2.5		0	2021-11-25	0.605619		1	0.000278477	0.00027153	0.000492667	0.000492667	0.6	1	0.394381	0.97144	277600	0.0243025	2.5	0.984771	0.999977	0.985952	0.000492667	0.000447393	0.000492458	00:00:00	505311	00:00:00			3.33348e+08	2022-04-22
2021-11-26	1.6824e+07	0			0.4	3168.16	7512.68	2.01888e+08	522.712	2.5		0	2021-11-26	0.605628		1	0.000277058	0.000270441	0.000491815	0.000491815	0.6	1	0.394372	0.97144	277900	0.0243025	2.5	0.984771	0.999978	0.98593	0.000491815	0.000446323	0.000491602	00:00:00	505324	00:00:00			3.33353e+08	2022-04-22
2021-11-27	1.68245e+07	0			0.4	3155.4	7482.62	2.01894e+08	520.598	2.5		0	2021-11-27	0.605637		1	0.000275644	0.000269354	0.000490964	0.000490964	0.6	1	0.394363	0.97144	278200	0.0243025	2.5	0.984771	0.999978	0.985908	0.000490964	0.000445256	0.000490747	00:00:00	505337	00:00:00			3.33359e+08	2022-04-22
2021-11-28	1.6825e+07	0			0.4	3142.67	7452.63	2.019e+08	518.489	2.5		0	2021-11-28	0.605645		1	0.000274236	0.00026827	0.000490115	0.000490115	0.6	1	0.394355	0.97144	278500	0.0243025	2.5	0.984771	0.999978	0.985886	0.000490115	0.000444192	0.000489893	00:00:00	505351	00:00:00			3.33364e+08	2022-04-22
2021-11-29	1.68255e+07	0			0.4	3129.97	7422.71	2.01907e+08	516.386	2.5		0	2021-11-29	0.605654		1	0.000272834	0.000267189	0.000489268	0.000489268	0.6	1	0.394346	0.97144	278800	0.0243025	2.5	0.984771	0.999978	0.985865	0.000489268	0.00044313	0.000489042	00:00:00	505364	00:00:00			3.33369e+08	2022-04-22
2021-11-30	1.68261e+07	0			0.4	3117.3	7392.87	2.01913e+08	514.288	2.5		0	2021-11-30	0.605663		1	0.000271438	0.00026611	0.000488422	0.000488422	0.6	1	0.394337	0.97144	279100	0.0243025	2.5	0.984771	0.999978	0.985843	0.000488422	0.000442071	0.000488192	00:00:00	505377	00:00:00			3.33375e+08	2022-04-22
2021-12-01	1.68266e+07	0			0.4	3104.67	7363.09	2.01919e+08	512.196	2.5		0	2021-12-01	0.605671		1	0.000270047	0.000265034	0.000487578	0.000487578	0.6	1	0.394329	0.97144	279400	0.0243025	2.5	0.984771	0.999978	0.985822	0.000487578	0.000441015	0.000487344	00:00:00	505390	00:00:00			3.3338e+08	2022-04-22
2021-12-02	1.68271e+07	0			0.4	3092.07	7333.39	2.01925e+08	510.109	2.5		0	2021-12-02	0.60568		1	0.000268663	0.00026396	0.000486736	0.000486736	0.6	1	0.39432	0.97144	279700	0.0243025	2.5	0.984771	0.999979	0.985801	0.000486736	0.000439962	0.000486497	00:00:00	505403	00:00:00			3.33386e+08	2022-04-22
2021-12-03	1.68276e+07	0			0.4	3079.5	7303.76	2.01931e+08	508.027	2.5		0	2021-12-03	0.605688		1	0.000267284	0.00026289	0.000485896	0.000485896	0.6	1	0.394312	0.97144	280000	0.0243025	2.5	0.984771	0.999979	0.98578	0.000485896	0.000438912	0.000485652	00:00:00	505416	00:00:00			3.33391e+08	2022-04-22
2021-12-04	1.68281e+07	0			0.4	3066.96	7274.21	2.01937e+08	505.951	2.5		0	2021-12-04	0.605696		1	0.000265911	0.000261822	0.000485057	0.000485057	0.6	1	0.394304	0.97144	280300	0.0243025	2.5	0.984771	0.999979	0.98576	0.000485057	0.000437864	0.000484809	00:00:00	505429	00:00:00			3.33397e+08	2022-04-22
2021-12-05	1.68286e+07	0			0.4	3054.45	7244.73	2.01943e+08	503.88	2.5		0	2021-12-05	0.605704		1	0.000264543	0.000260756	0.00048422	0.00048422	0.6	1	0.394296	0.97144	280600	0.0243025	2.5	0.984771	0.999979	0.985739	0.00048422	0.000436819	0.000483968	00:00:00	505442	00:00:00			3.33402e+08	2022-04-22
2021-12-06	1.68291e+07	0			0.4	3041.98	7215.32	2.01949e+08	501.815	2.5		0	2021-12-06	0.605712		1	0.000263181	0.000259694	0.000483384	0.000483384	0.6	1	0.394288	0.97144	280900	0.0243025	2.5	0.984771	0.999979	0.985719	0.000483384	0.000435777	0.000483128	00:00:00	505455	00:00:00			3.33408e+08	2022-04-22
2021-12-07	1.68296e+07	0			0.4	3029.54	7185.99	2.01955e+08	499.756	2.5		0	2021-12-07	0.60572		1	0.000261826	0.000258634	0.00048255	0.00048255	0.6	1	0.39428	0.97144	281200	0.0243025	2.5	0.984771	0.99998	0.985699	0.00048255	0.000434738	0.00048229	00:00:00	505467	00:00:00			3.33413e+08	2022-04-22
2021-12-08	1.68301e+07	0			0.4	3017.13	7156.74	2.01961e+08	497.702	2.5		0	2021-12-08	0.605728		1	0.000260475	0.000257577	0.000481718	0.000481718	0.6	1	0.394272	0.97144	281500	0.0243025	2.5	0.984771	0.99998	0.985679	0.000481718	0.000433701	0.000481454	00:00:00	505480	00:00:00			3.33419e+08	2022-04-22
2021-12-09	1.68306e+07	0			0.4	3004.76	7127.56	2.01967e+08	495.654	2.5		0	2021-12-09	0.605736		1	0.000259131	0.000256522	0.000480888	0.000480888	0.6	1	0.394264	0.97144	281800	0.0243025	2.5	0.984771	0.99998	0.985659	0.000480888	0.000432667	0.000480619	00:00:00	505493	00:00:00			3.33424e+08	2022-04-22
2021-12-10	1.68311e+07	0			0.4	2992.42	7098.46	2.01973e+08	493.612	2.5		0	2021-12-10	0.605744		1	0.000257793	0.000255471	0.000480059	0.000480059	0.6	1	0.394256	0.97144	282100	0.0243025	2.5	0.984771	0.99998	0.98564	0.000480059	0.000431635	0.000479786	00:00:00	505505	00:00:00			3.3343e+08	2022-04-22
2021-12-11	1.68316e+07	0			0.4	2980.11	7069.44	2.01979e+08	491.575	2.5		0	2021-12-11	0.605752		1	0.00025646	0.000254422	0.000479232	0.000479232	0.6	1	0.394248	0.97144	282400	0.0243025	2.5	0.984771	0.99998	0.985621	0.000479232	0.000430607	0.000478955	00:00:00	505518	00:00:00			3.33435e+08	2022-04-22
2021-12-12	1.68321e+07	0			0.4	2967.84	7040.49	2.01985e+08	489.544	2.5		0	2021-12-12	0.605759		1	0.000255133	0.000253376	0.000478406	0.000478406	0.6	1	0.394241	0.97144	282700	0.0243025	2.5	0.984771	0.999981	0.985601	0.000478406	0.000429581	0.000478125	00:00:00	505530	00:00:00			3.33441e+08	2022-04-22
2021-12-13	1.68326e+07	0			0.4	2955.6	7011.63	2.01991e+08	487.518	2.5		0	2021-12-13	0.605767		1	0.000253811	0.000252333	0.000477582	0.000477582	0.6	1	0.394233	0.97144	283000	0.0243025	2.5	0.984771	0.999981	0.985582	0.000477582	0.000428558	0.000477297	00:00:00	505543	00:00:00			3.33446e+08	2022-04-22
2021-12-14	1.6833e+07	0			0.4	2943.4	6982.84	2.01997e+08	485.499	2.5		0	2021-12-14	0.605775		1	0.000252496	0.000251293	0.00047676	0.00047676	0.6	1	0.394225	0.97144	283300	0.0243025	2.5	0.984771	0.999981	0.985564	0.00047676	0.000427537	0.00047647	00:00:00	505555	00:00:00			3.33452e+08	2022-04-22
2021-12-15	1.68335e+07	0			0.4	2931.23	6954.13	2.02002e+08	483.485	2.5		0	2021-12-15	0.605782		1	0.000251186	0.000250256	0.000475939	0.000475939	0.6	1	0.394218	0.97144	283600	0.0243025	2.5	0.984771	0.999981	0.985545	0.000475939	0.000426519	0.000475646	00:00:00	505567	00:00:00			3.33457e+08	2022-04-22
2021-12-16	1.6834e+07	0			0.4	2919.1	6925.49	2.02008e+08	481.477	2.5		0	2021-12-16	0.605789		1	0.000249881	0.000249221	0.00047512	0.00047512	0.6	1	0.394211	0.97144	283900	0.0243025	2.5	0.984771	0.999981	0.985527	0.00047512	0.000425504	0.000474822	00:00:00	505580	00:00:00			3.33463e+08	2022-04-22
2021-12-17	1.68345e+07	0			0.4	2907	6896.94	2.02014e+08	479.475	2.5		0	2021-12-17	0.605797		1	0.000248583	0.00024819	0.000474303	0.000474303	0.6	1	0.394203	0.97144	284200	0.0243025	2.5	0.984771	0.999981	0.985508	0.000474303	0.000424491	0.000474001	00:00:00	505592	00:00:00			3.33468e+08	2022-04-22
2021-12-18	1.6835e+07	0			0.4	2894.93	6868.47	2.0202e+08	477.478	2.5		0	2021-12-18	0.605804		1	0.00024729	0.000247161	0.000473487	0.000473487	0.6	1	0.394196	0.97144	284500	0.0243025	2.5	0.984771	0.999982	0.98549	0.000473487	0.000423481	0.000473181	00:00:00	505604	00:00:00			3.33474e+08	2022-04-22
2021-12-19	1.68354e+07	0			0.4	2882.9	6840.08	2.02025e+08	475.488	2.5		0	2021-12-19	0.605811		1	0.000246003	0.000246135	0.000472673	0.000472673	0.6	1	0.394189	0.97144	284800	0.0243025	2.5	0.984771	0.999982	0.985472	0.000472673	0.000422474	0.000472363	00:00:00	505616	00:00:00			3.33479e+08	2022-04-22
2021-12-20	1.68359e+07	0			0.4	2870.91	6811.76	2.02031e+08	473.503	2.5		0	2021-12-20	0.605818		1	0.000244722	0.000245112	0.00047186	0.00047186	0.6	1	0.394182	0.97144	285100	0.0243025	2.5	0.984771	0.999982	0.985455	0.00047186	0.000421469	0.000471546	00:00:00	505628	00:00:00			3.33485e+08	2022-04-22
2021-12-21	1.68364e+07	0			0.4	2858.94	6783.53	2.02037e+08	471.524	2.5		0	2021-12-21	0.605825		1	0.000243446	0.000244092	0.000471049	0.000471049	0.6	1	0.394175	0.97144	285400	0.0243025	2.5	0.984771	0.999982	0.985437	0.000471049	0.000420467	0.000470731	00:00:00	505640	00:00:00			3.3349e+08	2022-04-22
2021-12-22	1.68369e+07	0			0.4	2847.02	6755.38	2.02042e+08	469.552	2.5		0	2021-12-22	0.605832		1	0.000242176	0.000243075	0.00047024	0.00047024	0.6	1	0.394168	0.97144	285700	0.0243025	2.5	0.984771	0.999982	0.98542	0.00047024	0.000419467	0.000469918	00:00:00	505652	00:00:00			3.33496e+08	2022-04-22
2021-12-23	1.68373e+07	0			0.4	2835.13	6727.31	2.02048e+08	467.585	2.5		0	2021-12-23	0.605839		1	0.000240912	0.000242061	0.000469432	0.000469432	0.6	1	0.394161	0.97144	286000	0.0243025	2.5	0.984771	0.999983	0.985403	0.000469432	0.00041847	0.000469106	00:00:00	505664	00:00:00			3.33501e+08	2022-04-22
2021-12-24	1.68378e+07	0			0.4	2823.28	6699.33	2.02054e+08	465.624	2.5		0	2021-12-24	0.605846		1	0.000239653	0.00024105	0.000468626	0.000468626	0.6	1	0.394154	0.97144	286300	0.0243025	2.5	0.984771	0.999983	0.985386	0.000468626	0.000417476	0.000468296	00:00:00	505676	00:00:00			3.33507e+08	2022-04-22
2021-12-25	1.68383e+07	0			0.4	2811.46	6671.42	2.02059e+08	463.669	2.5		0	2021-12-25	0.605852		1	0.0002384	0.000240042	0.000467821	0.000467821	0.6	1	0.394148	0.97144	286600	0.0243025	2.5	0.984771	0.999983	0.985369	0.000467821	0.000416484	0.000467487	00:00:00	505688	00:00:00			3.33512e+08	2022-04-22
2021-12-26	1.68387e+07	0			0.4	2799.68	6643.6	2.02065e+08	461.721	2.5		0	2021-12-26	0.605859		1	0.000237153	0.000239037	0.000467018	0.000467018	0.6	1	0.394141	0.97144	286900	0.0243025	2.5	0.984771	0.999983	0.985352	0.000467018	0.000415495	0.00046668	00:00:00	505700	00:00:00			3.33517e+08	2022-04-22
2021-12-27	1.68392e+07	0			0.4	2787.93	6615.86	2.0207e+08	459.778	2.5		0	2021-12-27	0.605866		1	0.000235911	0.000238035	0.000466217	0.000466217	0.6	1	0.394134	0.97144	287200	0.0243025	2.5	0.984771	0.999983	0.985336	0.000466217	0.000414508	0.000465875	00:00:00	505712	00:00:00			3.33523e+08	2022-04-22
2021-12-28	1.68396e+07	0			0.4	2776.22	6588.2	2.02076e+08	457.841	2.5		0	2021-12-28	0.605872		1	0.000234675	0.000237036	0.000465417	0.000465417	0.6	1	0.394128	0.97144	287500	0.0243025	2.5	0.984771	0.999983	0.98532	0.000465417	0.000413524	0.000465071	00:00:00	505723	00:00:00			3.33528e+08	2022-04-22
2021-12-29	1.68401e+07	0			0.4	2764.54	6560.62	2.02081e+08	455.91	2.5		0	2021-12-29	0.605879		1	0.000233444	0.00023604	0.000464619	0.000464619	0.6	1	0.394121	0.97144	287800	0.0243025	2.5	0.984771	0.999984	0.985303	0.000464619	0.000412543	0.000464269	00:00:00	505735	00:00:00			3.33534e+08	2022-04-22
2021-12-30	1.68405e+07	0			0.4	2752.9	6533.13	2.02087e+08	453.986	2.5		0	2021-12-30	0.605885		1	0.00023222	0.000235047	0.000463822	0.000463822	0.6	1	0.394115	0.97144	288100	0.0243025	2.5	0.984771	0.999984	0.985287	0.000463822	0.000411564	0.000463469	00:00:00	505746	00:00:00			3.33539e+08	2022-04-22
2021-12-31	1.6841e+07	0			0.4	2741.3	6505.73	2.02092e+08	452.067	2.5		0	2021-12-31	0.605891		1	0.000231	0.000234058	0.000463027	0.000463027	0.6	1	0.394109	0.97144	288400	0.0243025	2.5	0.984771	0.999984	0.985272	0.000463027	0.000410587	0.00046267	00:00:00	505758	00:00:00			3.33545e+08	2022-04-22
2022-01-01	1.68414e+07	0			0.4	2729.74	6478.4	2.02097e+08	450.155	2.5		0	2022-01-01	0.605898		1	0.000229787	0.000233071	0.000462233	0.000462233	0.6	1	0.394102	0.97144	288700	0.0243025	2.5	0.984771	0.999984	0.985256	0.000462233	0.000409613	0.000461872	00:00:00	505770	00:00:00			3.3355e+08	2022-04-22
2022-01-02	1.68419e+07	0			0.4	2718.21	6451.16	2.02103e+08	448.248	2.5		0	2022-01-02	0.605904		1	0.000228579	0.000232087	0.000461441	0.000461441	0.6	1	0.394096	0.97144	289000	0.0243025	2.5	0.984771	0.999984	0.985241	0.000461441	0.000408642	0.000461076	00:00:00	505781	00:00:00			3.33556e+08	2022-04-22
2022-01-03	1.68423e+07	0			0.4	2706.71	6424.01	2.02108e+08	446.348	2.5		0	2022-01-03	0.60591		1	0.000227376	0.000231106	0.000460651	0.000460651	0.6	1	0.39409	0.97144	289300	0.0243025	2.5	0.984771	0.999985	0.985225	0.000460651	0.000407673	0.000460282	00:00:00	505792	00:00:00			3.33561e+08	2022-04-22
2022-01-04	1.68428e+07	0			0.4	2695.26	6396.94	2.02113e+08	444.454	2.5		0	2022-01-04	0.605916		1	0.000226179	0.000230129	0.000459862	0.000459862	0.6	1	0.394084	0.97144	289600	0.0243025	2.5	0.984771	0.999985	0.98521	0.000459862	0.000406707	0.000459489	00:00:00	505804	00:00:00			3.33567e+08	2022-04-22
2022-01-05	1.68432e+07	0			0.4	2683.84	6369.95	2.02119e+08	442.566	2.5		0	2022-01-05	0.605922		1	0.000224988	0.000229154	0.000459075	0.000459075	0.6	1	0.394078	0.97144	289900	0.0243025	2.5	0.984771	0.999985	0.985195	0.000459075	0.000405743	0.000458698	00:00:00	505815	00:00:00			3.33572e+08	2022-04-22
2022-01-06	1.68437e+07	0			0.4	2672.45	6343.05	2.02124e+08	440.684	2.5		0	2022-01-06	0.605928		1	0.000223802	0.000228182	0.000458289	0.000458289	0.6	1	0.394072	0.97144	290200	0.0243025	2.5	0.984771	0.999985	0.985181	0.000458289	0.000404782	0.000457909	00:00:00	505826	00:00:00			3.33578e+08	2022-04-22
2022-01-07	1.68441e+07	0			0.4	2661.11	6316.23	2.02129e+08	438.808	2.5		0	2022-01-07	0.605934		1	0.000222622	0.000227214	0.000457505	0.000457505	0.6	1	0.394066	0.97144	290500	0.0243025	2.5	0.984771	0.999985	0.985166	0.000457505	0.000403823	0.000457121	00:00:00	505837	00:00:00			3.33583e+08	2022-04-22
2022-01-08	1.68445e+07	0			0.4	2649.8	6289.5	2.02135e+08	436.939	2.5		0	2022-01-08	0.605939		1	0.000221447	0.000226249	0.000456722	0.000456722	0.6	1	0.394061	0.97144	290800	0.0243025	2.5	0.984771	0.999985	0.985152	0.000456722	0.000402866	0.000456334	00:00:00	505849	00:00:00			3.33589e+08	2022-04-22
2022-01-09	1.6845e+07	0			0.4	2638.53	6262.86	2.0214e+08	435.076	2.5		0	2022-01-09	0.605945		1	0.000220278	0.000225287	0.000455941	0.000455941	0.6	1	0.394055	0.97144	291100	0.0243025	2.5	0.984771	0.999986	0.985138	0.000455941	0.000401912	0.000455549	00:00:00	505860	00:00:00			3.33594e+08	2022-04-22
2022-01-10	1.68454e+07	0			0.4	2627.29	6236.3	2.02145e+08	433.219	2.5		0	2022-01-10	0.605951		1	0.000219114	0.000224328	0.000455161	0.000455161	0.6	1	0.394049	0.97144	291400	0.0243025	2.5	0.984771	0.999986	0.985124	0.000455161	0.000400961	0.000454766	00:00:00	505871	00:00:00			3.336e+08	2022-04-22
2022-01-11	1.68458e+07	0			0.4	2616.09	6209.83	2.0215e+08	431.368	2.5		0	2022-01-11	0.605956		1	0.000217956	0.000223372	0.000454383	0.000454383	0.6	1	0.394044	0.97144	291700	0.0243025	2.5	0.984771	0.999986	0.98511	0.000454383	0.000400012	0.000453984	00:00:00	505882	00:00:00			3.33605e+08	2022-04-22
2022-01-12	1.68463e+07	0			0.4	2604.93	6183.44	2.02155e+08	429.523	2.5		0	2022-01-12	0.605962		1	0.000216803	0.000222419	0.000453606	0.000453606	0.6	1	0.394038	0.97144	292000	0.0243025	2.5	0.984771	0.999986	0.985096	0.000453606	0.000399065	0.000453204	00:00:00	505893	00:00:00			3.33611e+08	2022-04-22
2022-01-13	1.68467e+07	0			0.4	2593.81	6157.14	2.0216e+08	427.685	2.5		0	2022-01-13	0.605967		1	0.000215655	0.000221469	0.000452831	0.000452831	0.6	1	0.394033	0.97144	292300	0.0243025	2.5	0.984771	0.999986	0.985082	0.000452831	0.000398121	0.000452425	00:00:00	505904	00:00:00			3.33616e+08	2022-04-22
2022-01-14	1.68471e+07	0			0.4	2582.72	6130.93	2.02166e+08	425.853	2.5		0	2022-01-14	0.605972		1	0.000214513	0.000220523	0.000452058	0.000452058	0.6	1	0.394028	0.97144	292600	0.0243025	2.5	0.984771	0.999986	0.985069	0.000452058	0.000397179	0.000451648	00:00:00	505914	00:00:00			3.33622e+08	2022-04-22
2022-01-15	1.68476e+07	0			0.4	2571.67	6104.8	2.02171e+08	424.027	2.5		0	2022-01-15	0.605978		1	0.000213377	0.000219579	0.000451286	0.000451286	0.6	1	0.394022	0.97144	292900	0.0243025	2.5	0.984771	0.999987	0.985056	0.000451286	0.00039624	0.000450872	00:00:00	505925	00:00:00			3.33627e+08	2022-04-22
2022-01-16	1.6848e+07	0			0.4	2560.66	6078.76	2.02176e+08	422.207	2.5		0	2022-01-16	0.605983		1	0.000212246	0.000218639	0.000450515	0.000450515	0.6	1	0.394017	0.97144	293200	0.0243025	2.5	0.984771	0.999987	0.985043	0.000450515	0.000395303	0.000450098	00:00:00	505936	00:00:00			3.33633e+08	2022-04-22
2022-01-17	1.68484e+07	0			0.4	2549.69	6052.8	2.02181e+08	420.394	2.5		0	2022-01-17	0.605988		1	0.00021112	0.000217702	0.000449746	0.000449746	0.6	1	0.394012	0.97144	293500	0.0243025	2.5	0.984771	0.999987	0.98503	0.000449746	0.000394369	0.000449325	00:00:00	505947	00:00:00			3.33638e+08	2022-04-22
2022-01-18	1.68488e+07	0			0.4	2538.75	6026.93	2.02186e+08	418.586	2.5		0	2022-01-18	0.605993		1	0.00021	0.000216768	0.000448978	0.000448978	0.6	1	0.394007	0.97144	293800	0.0243025	2.5	0.984771	0.999987	0.985017	0.000448978	0.000393437	0.000448554	00:00:00	505957	00:00:00			3.33644e+08	2022-04-22
2022-01-19	1.68492e+07	0			0.4	2527.85	6001.15	2.02191e+08	416.786	2.5		0	2022-01-19	0.605998		1	0.000208885	0.000215837	0.000448212	0.000448212	0.6	1	0.394002	0.97144	294100	0.0243025	2.5	0.984771	0.999987	0.985004	0.000448212	0.000392507	0.000447784	00:00:00	505968	00:00:00			3.33649e+08	2022-04-22
2022-01-20	1.68496e+07	0			0.4	2516.99	5975.46	2.02196e+08	414.991	2.5		0	2022-01-20	0.606003		1	0.000207776	0.000214909	0.000447448	0.000447448	0.6	1	0.393997	0.97144	294400	0.0243025	2.5	0.984771	0.999987	0.984992	0.000447448	0.00039158	0.000447016	00:00:00	505979	00:00:00			3.33655e+08	2022-04-22
2022-01-21	1.68501e+07	0			0.4	2506.17	5949.85	2.02201e+08	413.203	2.5		0	2022-01-21	0.606008		1	0.000206672	0.000213985	0.000446685	0.000446685	0.6	1	0.393992	0.97144	294700	0.0243025	2.5	0.984771	0.999988	0.98498	0.000446685	0.000390655	0.000446249	00:00:00	505989	00:00:00			3.3366e+08	2022-04-22
2022-01-22	1.68505e+07	0			0.4	2495.38	5924.34	2.02206e+08	411.421	2.5		0	2022-01-22	0.606013		1	0.000205573	0.000213064	0.000445923	0.000445923	0.6	1	0.393987	0.97144	295000	0.0243025	2.5	0.984771	0.999988	0.984968	0.000445923	0.000389732	0.000445484	00:00:00	506000	00:00:00			3.33666e+08	2022-04-22
2022-01-23	1.68509e+07	0			0.4	2484.63	5898.91	2.02211e+08	409.645	2.5		0	2022-01-23	0.606018		1	0.000204479	0.000212146	0.000445163	0.000445163	0.6	1	0.393982	0.97144	295300	0.0243025	2.5	0.984771	0.999988	0.984956	0.000445163	0.000388812	0.000444721	00:00:00	506010	00:00:00			3.33671e+08	2022-04-22
2022-01-24	1.68513e+07	0			0.4	2473.92	5873.56	2.02215e+08	407.875	2.5		0	2022-01-24	0.606022		1	0.000203391	0.000211231	0.000444404	0.000444404	0.6	1	0.393978	0.97144	295600	0.0243025	2.5	0.984771	0.999988	0.984944	0.000444404	0.000387894	0.000443958	00:00:00	506021	00:00:00			3.33677e+08	2022-04-22
2022-01-25	1.68517e+07	0			0.4	2463.25	5848.31	2.0222e+08	406.112	2.5		0	2022-01-25	0.606027		1	0.000202308	0.000210319	0.000443647	0.000443647	0.6	1	0.393973	0.97144	295900	0.0243025	2.5	0.984771	0.999988	0.984932	0.000443647	0.000386979	0.000443198	00:00:00	506031	00:00:00			3.33682e+08	2022-04-22
2022-01-26	1.68521e+07	0			0.4	2452.61	5823.14	2.02225e+08	404.355	2.5		0	2022-01-26	0.606032		1	0.000201231	0.00020941	0.000442891	0.000442891	0.6	1	0.393968	0.97144	296200	0.0243025	2.5	0.984771	0.999988	0.984921	0.000442891	0.000386066	0.000442439	00:00:00	506041	00:00:00			3.33687e+08	2022-04-22
2022-01-27	1.68525e+07	0			0.4	2442.01	5798.06	2.0223e+08	402.605	2.5		0	2022-01-27	0.606036		1	0.000200159	0.000208505	0.000442137	0.000442137	0.6	1	0.393964	0.97144	296500	0.0243025	2.5	0.984771	0.999989	0.98491	0.000442137	0.000385155	0.000441681	00:00:00	506052	00:00:00			3.33693e+08	2022-04-22
2022-01-28	1.68529e+07	0			0.4	2431.45	5773.07	2.02235e+08	400.86	2.5		0	2022-01-28	0.606041		1	0.000199091	0.000207603	0.000441384	0.000441384	0.6	1	0.393959	0.97144	296800	0.0243025	2.5	0.984771	0.999989	0.984899	0.000441384	0.000384247	0.000440925	00:00:00	506062	00:00:00			3.33698e+08	2022-04-22
2022-01-29	1.68533e+07	0			0.4	2420.93	5748.16	2.0224e+08	399.122	2.5		0	2022-01-29	0.606045		1	0.00019803	0.000206704	0.000440633	0.000440633	0.6	1	0.393955	0.97144	297100	0.0243025	2.5	0.984771	0.999989	0.984888	0.000440633	0.000383341	0.00044017	00:00:00	506072	00:00:00			3.33704e+08	2022-04-22
2022-01-30	1.68537e+07	0			0.4	2410.44	5723.34	2.02244e+08	397.391	2.5		0	2022-01-30	0.606049		1	0.000196973	0.000205808	0.000439883	0.000439883	0.6	1	0.393951	0.97144	297400	0.0243025	2.5	0.984771	0.999989	0.984877	0.000439883	0.000382437	0.000439417	00:00:00	506082	00:00:00			3.33709e+08	2022-04-22
2022-01-31	1.68541e+07	0			0.4	2400	5698.62	2.02249e+08	395.665	2.5		0	2022-01-31	0.606054		1	0.000195922	0.000204916	0.000439135	0.000439135	0.6	1	0.393946	0.97144	297700	0.0243025	2.5	0.984771	0.999989	0.984866	0.000439135	0.000381535	0.000438665	00:00:00	506092	00:00:00			3.33715e+08	2022-04-22
2022-02-01	1.68545e+07	0			0.4	2389.59	5673.98	2.02254e+08	393.946	2.5		0	2022-02-01	0.606058		1	0.000194876	0.000204026	0.000438388	0.000438388	0.6	1	0.393942	0.97144	298000	0.0243025	2.5	0.984771	0.999989	0.984856	0.000438388	0.000380636	0.000437915	00:00:00	506102	00:00:00			3.3372e+08	2022-04-22
2022-02-02	1.68549e+07	0			0.4	2379.22	5649.42	2.02259e+08	392.233	2.5		0	2022-02-02	0.606062		1	0.000193835	0.00020314	0.000437643	0.000437643	0.6	1	0.393938	0.97144	298300	0.0243025	2.5	0.984771	0.999989	0.984845	0.000437643	0.000379739	0.000437166	00:00:00	506112	00:00:00			3.33726e+08	2022-04-22
2022-02-03	1.68553e+07	0			0.4	2368.88	5624.96	2.02263e+08	390.527	2.5		0	2022-02-03	0.606066		1	0.000192799	0.000202257	0.000436899	0.000436899	0.6	1	0.393934	0.97144	298600	0.0243025	2.5	0.984771	0.99999	0.984835	0.000436899	0.000378845	0.000436418	00:00:00	506122	00:00:00			3.33731e+08	2022-04-22
2022-02-04	1.68557e+07	0			0.4	2358.59	5600.58	2.02268e+08	388.827	2.5		0	2022-02-04	0.60607		1	0.000191768	0.000201377	0.000436156	0.000436156	0.6	1	0.39393	0.97144	298900	0.0243025	2.5	0.984771	0.99999	0.984825	0.000436156	0.000377952	0.000435672	00:00:00	506132	00:00:00			3.33737e+08	2022-04-22
2022-02-05	1.6856e+07	0			0.4	2348.33	5576.3	2.02273e+08	387.133	2.5		0	2022-02-05	0.606074		1	0.000190743	0.000200501	0.000435415	0.000435415	0.6	1	0.393926	0.97144	299200	0.0243025	2.5	0.984771	0.99999	0.984815	0.000435415	0.000377062	0.000434928	00:00:00	506142	00:00:00			3.33742e+08	2022-04-22
2022-02-06	1.68564e+07	0			0.4	2338.11	5552.1	2.02277e+08	385.445	2.5		0	2022-02-06	0.606078		1	0.000189723	0.000199627	0.000434675	0.000434675	0.6	1	0.393922	0.97144	299500	0.0243025	2.5	0.984771	0.99999	0.984805	0.000434675	0.000376175	0.000434185	00:00:00	506152	00:00:00			3.33748e+08	2022-04-22
2022-02-07	1.68568e+07	0			0.4	2327.93	5527.99	2.02282e+08	383.764	2.5		0	2022-02-07	0.606082		1	0.000188707	0.000198757	0.000433937	0.000433937	0.6	1	0.393918	0.97144	299800	0.0243025	2.5	0.984771	0.99999	0.984796	0.000433937	0.000375289	0.000433443	00:00:00	506162	00:00:00			3.33753e+08	2022-04-22
2022-02-08	1.68572e+07	0			0.4	2317.78	5503.96	2.02286e+08	382.089	2.5		0	2022-02-08	0.606085		1	0.000187697	0.00019789	0.0004332	0.0004332	0.6	1	0.393915	0.97144	300100	0.0243025	2.5	0.984771	0.99999	0.984786	0.0004332	0.000374406	0.000432703	00:00:00	506171	00:00:00			3.33759e+08	2022-04-22
2022-02-09	1.68576e+07	0			0.4	2307.68	5480.03	2.02291e+08	380.42	2.5		0	2022-02-09	0.606089		1	0.000186692	0.000197026	0.000432464	0.000432464	0.6	1	0.393911	0.97144	300400	0.0243025	2.5	0.984771	0.999991	0.984777	0.000432464	0.000373525	0.000431964	00:00:00	506181	00:00:00			3.33764e+08	2022-04-22
2022-02-10	1.6858e+07	0			0.4	2297.61	5456.18	2.02295e+08	378.758	2.5		0	2022-02-10	0.606093		1	0.000185692	0.000196166	0.00043173	0.00043173	0.6	1	0.393907	0.97144	300700	0.0243025	2.5	0.984771	0.999991	0.984768	0.00043173	0.000372646	0.000431227	00:00:00	506191	00:00:00			3.3377e+08	2022-04-22
2022-02-11	1.68583e+07	0			0.4	2287.58	5432.42	2.023e+08	377.102	2.5		0	2022-02-11	0.606096		1	0.000184697	0.000195308	0.000430998	0.000430998	0.6	1	0.393904	0.97144	301000	0.0243025	2.5	0.984771	0.999991	0.984759	0.000430998	0.00037177	0.000430491	00:00:00	506200	00:00:00			3.33775e+08	2022-04-22
2022-02-12	1.68587e+07	0			0.4	2277.59	5408.75	2.02305e+08	375.452	2.5		0	2022-02-12	0.6061		1	0.000183707	0.000194454	0.000430267	0.000430267	0.6	1	0.3939	0.97144	301300	0.0243025	2.5	0.984771	0.999991	0.98475	0.000430267	0.000370896	0.000429756	00:00:00	506210	00:00:00			3.33781e+08	2022-04-22
2022-02-13	1.68591e+07	0			0.4	2267.63	5385.17	2.02309e+08	373.809	2.5		0	2022-02-13	0.606103		1	0.000182722	0.000193603	0.000429537	0.000429537	0.6	1	0.393897	0.97144	301600	0.0243025	2.5	0.984771	0.999991	0.984741	0.000429537	0.000370024	0.000429023	00:00:00	506220	00:00:00			3.33786e+08	2022-04-22
2022-02-14	1.68595e+07	0			0.4	2257.71	5361.68	2.02313e+08	372.172	2.5		0	2022-02-14	0.606107		1	0.000181743	0.000192755	0.000428808	0.000428808	0.6	1	0.393893	0.97144	301900	0.0243025	2.5	0.984771	0.999991	0.984733	0.000428808	0.000369154	0.000428292	00:00:00	506229	00:00:00			3.33792e+08	2022-04-22
2022-02-15	1.68598e+07	0			0.4	2247.83	5338.27	2.02318e+08	370.541	2.5		0	2022-02-15	0.60611		1	0.000180768	0.000191911	0.000428081	0.000428081	0.6	1	0.39389	0.97144	302200	0.0243025	2.5	0.984771	0.999991	0.984724	0.000428081	0.000368286	0.000427562	00:00:00	506238	00:00:00			3.33797e+08	2022-04-22
2022-02-16	1.68602e+07	0			0.4	2237.99	5314.96	2.02322e+08	368.916	2.5		0	2022-02-16	0.606114		1	0.000179798	0.000191069	0.000427356	0.000427356	0.6	1	0.393886	0.97144	302500	0.0243025	2.5	0.984771	0.999992	0.984716	0.000427356	0.000367421	0.000426833	00:00:00	506248	00:00:00			3.33803e+08	2022-04-22
2022-02-17	1.68606e+07	0			0.4	2228.19	5291.73	2.02327e+08	367.298	2.5		0	2022-02-17	0.606117		1	0.000178833	0.000190231	0.000426632	0.000426632	0.6	1	0.393883	0.97144	302800	0.0243025	2.5	0.984771	0.999992	0.984708	0.000426632	0.000366558	0.000426105	00:00:00	506257	00:00:00			3.33808e+08	2022-04-22
2022-02-18	1.68609e+07	0			0.4	2218.42	5268.59	2.02331e+08	365.686	2.5		0	2022-02-18	0.60612		1	0.000177873	0.000189396	0.000425909	0.000425909	0.6	1	0.39388	0.97144	303100	0.0243025	2.5	0.984771	0.999992	0.9847	0.000425909	0.000365697	0.00042538	00:00:00	506267	00:00:00			3.33814e+08	2022-04-22
2022-02-19	1.68613e+07	0			0.4	2208.69	5245.53	2.02335e+08	364.08	2.5		0	2022-02-19	0.606123		1	0.000176917	0.000188564	0.000425188	0.000425188	0.6	1	0.393877	0.97144	303400	0.0243025	2.5	0.984771	0.999992	0.984692	0.000425188	0.000364838	0.000424655	00:00:00	506276	00:00:00			3.33819e+08	2022-04-22
2022-02-20	1.68617e+07	0			0.4	2199	5222.57	2.0234e+08	362.48	2.5		0	2022-02-20	0.606126		1	0.000175967	0.000187736	0.000424468	0.000424468	0.6	1	0.393874	0.97144	303700	0.0243025	2.5	0.984771	0.999992	0.984685	0.000424468	0.000363982	0.000423932	00:00:00	506285	00:00:00			3.33825e+08	2022-04-22
2022-02-21	1.6862e+07	0			0.4	2189.35	5199.69	2.02344e+08	360.887	2.5		0	2022-02-21	0.606129		1	0.000175022	0.00018691	0.000423749	0.000423749	0.6	1	0.393871	0.97144	304000	0.0243025	2.5	0.984771	0.999992	0.984677	0.000423749	0.000363127	0.00042321	00:00:00	506294	00:00:00			3.3383e+08	2022-04-22
2022-02-22	1.68624e+07	0			0.4	2179.73	5176.9	2.02348e+08	359.3	2.5		0	2022-02-22	0.606132		1	0.000174081	0.000186088	0.000423032	0.000423032	0.6	1	0.393868	0.97144	304300	0.0243025	2.5	0.984771	0.999993	0.98467	0.000423032	0.000362275	0.00042249	00:00:00	506304	00:00:00			3.33836e+08	2022-04-22
2022-02-23	1.68627e+07	0			0.4	2170.15	5154.2	2.02353e+08	357.719	2.5		0	2022-02-23	0.606135		1	0.000173146	0.000185269	0.000422316	0.000422316	0.6	1	0.393865	0.97144	304600	0.0243025	2.5	0.984771	0.999993	0.984663	0.000422316	0.000361425	0.000421771	00:00:00	506313	00:00:00			3.33841e+08	2022-04-22
2022-02-24	1.68631e+07	0			0.4	2160.61	5131.59	2.02357e+08	356.145	2.5		0	2022-02-24	0.606138		1	0.000172215	0.000184453	0.000421601	0.000421601	0.6	1	0.393862	0.97144	304900	0.0243025	2.5	0.984771	0.999993	0.984655	0.000421601	0.000360577	0.000421053	00:00:00	506322	00:00:00			3.33847e+08	2022-04-22
2022-02-25	1.68634e+07	0			0.4	2151.11	5109.06	2.02361e+08	354.576	2.5		0	2022-02-25	0.606141		1	0.000171289	0.00018364	0.000420888	0.000420888	0.6	1	0.393859	0.97144	305200	0.0243025	2.5	0.984771	0.999993	0.984648	0.000420888	0.000359731	0.000420337	00:00:00	506331	00:00:00			3.33852e+08	2022-04-22
2022-02-26	1.68638e+07	0			0.4	2141.64	5086.62	2.02366e+08	353.014	2.5		0	2022-02-26	0.606143		1	0.000170367	0.000182831	0.000420176	0.000420176	0.6	1	0.393857	0.97144	305500	0.0243025	2.5	0.984771	0.999993	0.984642	0.000420176	0.000358887	0.000419622	00:00:00	506340	00:00:00			3.33858e+08	2022-04-22
2022-02-27	1.68641e+07	0			0.4	2132.21	5064.27	2.0237e+08	351.458	2.5		0	2022-02-27	0.606146		1	0.000169451	0.000182025	0.000419466	0.000419466	0.6	1	0.393854	0.97144	305800	0.0243025	2.5	0.984771	0.999993	0.984635	0.000419466	0.000358046	0.000418909	00:00:00	506349	00:00:00			3.33863e+08	2022-04-22
2022-02-28	1.68645e+07	0			0.4	2122.82	5042.01	2.02374e+08	349.908	2.5		0	2022-02-28	0.606149		1	0.000168539	0.000181221	0.000418757	0.000418757	0.6	1	0.393851	0.97144	306100	0.0243025	2.5	0.984771	0.999993	0.984628	0.000418757	0.000357207	0.000418197	00:00:00	506358	00:00:00			3.33869e+08	2022-04-22
2022-03-01	1.68648e+07	0			0.4	2113.47	5019.83	2.02378e+08	348.365	2.5		0	2022-03-01	0.606151		1	0.000167632	0.000180421	0.000418049	0.000418049	0.6	1	0.393849	0.97144	306400	0.0243025	2.5	0.984771	0.999994	0.984622	0.000418049	0.000356369	0.000417486	00:00:00	506367	00:00:00			3.33874e+08	2022-04-22
2022-03-02	1.68652e+07	0			0.4	2104.15	4997.74	2.02382e+08	346.828	2.5		0	2022-03-02	0.606154		1	0.00016673	0.000179624	0.000417343	0.000417343	0.6	1	0.393846	0.97144	306700	0.0243025	2.5	0.984771	0.999994	0.984616	0.000417343	0.000355534	0.000416776	00:00:00	506375	00:00:00			3.3388e+08	2022-04-22
2022-03-03	1.68655e+07	0			0.4	2094.87	4975.74	2.02386e+08	345.297	2.5		0	2022-03-03	0.606156		1	0.000165832	0.000178831	0.000416638	0.000416638	0.6	1	0.393844	0.97144	307000	0.0243025	2.5	0.984771	0.999994	0.98461	0.000416638	0.000354701	0.000416069	00:00:00	506384	00:00:00			3.33885e+08	2022-04-22
2022-03-04	1.68659e+07	0			0.4	2085.63	4953.83	2.02391e+08	343.772	2.5		0	2022-03-04	0.606159		1	0.00016494	0.00017804	0.000415935	0.000415935	0.6	1	0.393841	0.97144	307300	0.0243025	2.5	0.984771	0.999994	0.984604	0.000415935	0.00035387	0.000415362	00:00:00	506393	00:00:00			3.33891e+08	2022-04-22
2022-03-05	1.68662e+07	0			0.4	2076.42	4932	2.02395e+08	342.253	2.5		0	2022-03-05	0.606161		1	0.000164051	0.000177253	0.000415232	0.000415232	0.6	1	0.393839	0.97144	307600	0.0243025	2.5	0.984771	0.999994	0.984598	0.000415232	0.000353042	0.000414657	00:00:00	506402	00:00:00			3.33896e+08	2022-04-22
2022-03-06	1.68666e+07	0			0.4	2067.25	4910.26	2.02399e+08	340.74	2.5		0	2022-03-06	0.606163		1	0.000163168	0.000176469	0.000414531	0.000414531	0.6	1	0.393837	0.97144	307900	0.0243025	2.5	0.984771	0.999994	0.984592	0.000414531	0.000352215	0.000413953	00:00:00	506410	00:00:00			3.33901e+08	2022-04-22
2022-03-07	1.68669e+07	0			0.4	2058.12	4888.61	2.02403e+08	339.234	2.5		0	2022-03-07	0.606165		1	0.000162289	0.000175688	0.000413832	0.000413832	0.6	1	0.393835	0.97144	308200	0.0243025	2.5	0.984771	0.999994	0.984587	0.000413832	0.00035139	0.00041325	00:00:00	506419	00:00:00			3.33907e+08	2022-04-22
2022-03-08	1.68672e+07	0			0.4	2049.03	4867.04	2.02407e+08	337.733	2.5		0	2022-03-08	0.606168		1	0.000161415	0.00017491	0.000413134	0.000413134	0.6	1	0.393832	0.97144	308500	0.0243025	2.5	0.984771	0.999994	0.984581	0.000413134	0.000350568	0.000412549	00:00:00	506428	00:00:00			3.33912e+08	2022-04-22
2022-03-09	1.68676e+07	0			0.4	2039.97	4845.56	2.02411e+08	336.239	2.5		0	2022-03-09	0.60617		1	0.000160545	0.000174135	0.000412437	0.000412437	0.6	1	0.39383	0.97144	308800	0.0243025	2.5	0.984771	0.999995	0.984576	0.000412437	0.000349747	0.000411849	00:00:00	506436	00:00:00			3.33918e+08	2022-04-22
2022-03-10	1.68679e+07	0			0.4	2030.95	4824.17	2.02415e+08	334.751	2.5		0	2022-03-10	0.606172		1	0.00015968	0.000173363	0.000411741	0.000411741	0.6	1	0.393828	0.97144	309100	0.0243025	2.5	0.984771	0.999995	0.984571	0.000411741	0.000348929	0.000411151	00:00:00	506445	00:00:00			3.33923e+08	2022-04-22
2022-03-11	1.68682e+07	0			0.4	2021.97	4802.86	2.02419e+08	333.269	2.5		0	2022-03-11	0.606174		1	0.00015882	0.000172595	0.000411047	0.000411047	0.6	1	0.393826	0.97144	309400	0.0243025	2.5	0.984771	0.999995	0.984566	0.000411047	0.000348112	0.000410453	00:00:00	506453	00:00:00			3.33929e+08	2022-04-22
2022-03-12	1.68686e+07	0			0.4	2013.02	4781.64	2.02423e+08	331.793	2.5		0	2022-03-12	0.606176		1	0.000157964	0.000171829	0.000410354	0.000410354	0.6	1	0.393824	0.97144	309700	0.0243025	2.5	0.984771	0.999995	0.984561	0.000410354	0.000347298	0.000409758	00:00:00	506462	00:00:00			3.33934e+08	2022-04-22
2022-03-13	1.68689e+07	0			0.4	2004.11	4760.5	2.02427e+08	330.323	2.5		0	2022-03-13	0.606178		1	0.000157112	0.000171067	0.000409662	0.000409662	0.6	1	0.393822	0.97144	310000	0.0243025	2.5	0.984771	0.999995	0.984556	0.000409662	0.000346486	0.000409063	00:00:00	506470	00:00:00			3.3394e+08	2022-04-22
2022-03-14	1.68692e+07	0			0.4	1995.23	4739.46	2.02431e+08	328.86	2.5		0	2022-03-14	0.606179		1	0.000156266	0.000170308	0.000408972	0.000408972	0.6	1	0.393821	0.97144	310300	0.0243025	2.5	0.984771	0.999995	0.984551	0.000408972	0.000345676	0.00040837	00:00:00	506479	00:00:00			3.33945e+08	2022-04-22
2022-03-15	1.68696e+07	0			0.4	1986.4	4718.49	2.02435e+08	327.402	2.5		0	2022-03-15	0.606181		1	0.000155423	0.000169552	0.000408283	0.000408283	0.6	1	0.393819	0.97144	310600	0.0243025	2.5	0.984771	0.999995	0.984547	0.000408283	0.000344868	0.000407678	00:00:00	506487	00:00:00			3.33951e+08	2022-04-22
2022-03-16	1.68699e+07	0			0.4	1977.6	4697.61	2.02439e+08	325.95	2.5		0	2022-03-16	0.606183		1	0.000154585	0.000168799	0.000407595	0.000407595	0.6	1	0.393817	0.97144	310900	0.0243025	2.5	0.984771	0.999996	0.984543	0.000407595	0.000344062	0.000406988	00:00:00	506495	00:00:00			3.33956e+08	2022-04-22
2022-03-17	1.68702e+07	0			0.4	1968.83	4676.82	2.02443e+08	324.505	2.5		0	2022-03-17	0.606185		1	0.000153752	0.000168049	0.000406909	0.000406909	0.6	1	0.393815	0.97144	311200	0.0243025	2.5	0.984771	0.999996	0.984538	0.000406909	0.000343258	0.000406298	00:00:00	506504	00:00:00			3.33962e+08	2022-04-22
2022-03-18	1.68705e+07	0			0.4	1960.1	4656.12	2.02446e+08	323.065	2.5		0	2022-03-18	0.606186		1	0.000152923	0.000167302	0.000406224	0.000406224	0.6	1	0.393814	0.97144	311500	0.0243025	2.5	0.984771	0.999996	0.984534	0.000406224	0.000342455	0.000405611	00:00:00	506512	00:00:00			3.33967e+08	2022-04-22
2022-03-19	1.68709e+07	0			0.4	1951.41	4635.5	2.0245e+08	321.632	2.5		0	2022-03-19	0.606188		1	0.000152098	0.000166558	0.00040554	0.00040554	0.6	1	0.393812	0.97144	311800	0.0243025	2.5	0.984771	0.999996	0.98453	0.00040554	0.000341655	0.000404924	00:00:00	506520	00:00:00			3.33973e+08	2022-04-22
2022-03-20	1.68712e+07	0			0.4	1942.76	4614.96	2.02454e+08	320.204	2.5		0	2022-03-20	0.606189		1	0.000151278	0.000165818	0.000404858	0.000404858	0.6	1	0.393811	0.97144	312100	0.0243025	2.5	0.984771	0.999996	0.984526	0.000404858	0.000340857	0.000404239	00:00:00	506528	00:00:00			3.33978e+08	2022-04-22
2022-03-21	1.68715e+07	0			0.4	1934.14	4594.51	2.02458e+08	318.783	2.5		0	2022-03-21	0.606191		1	0.000150462	0.00016508	0.000404177	0.000404177	0.6	1	0.393809	0.97144	312400	0.0243025	2.5	0.984771	0.999996	0.984523	0.000404177	0.000340061	0.000403555	00:00:00	506536	00:00:00			3.33984e+08	2022-04-22
2022-03-22	1.68718e+07	0			0.4	1925.56	4574.14	2.02462e+08	317.367	2.5		0	2022-03-22	0.606192		1	0.000149651	0.000164346	0.000403497	0.000403497	0.6	1	0.393808	0.97144	312700	0.0243025	2.5	0.984771	0.999996	0.984519	0.000403497	0.000339267	0.000402872	00:00:00	506544	00:00:00			3.33989e+08	2022-04-22
2022-03-23	1.68721e+07	0			0.4	1917.01	4553.86	2.02466e+08	315.958	2.5		0	2022-03-23	0.606194		1	0.000148844	0.000163614	0.000402818	0.000402818	0.6	1	0.393806	0.97144	313000	0.0243025	2.5	0.984771	0.999996	0.984516	0.000402818	0.000338475	0.000402191	00:00:00	506553	00:00:00			3.33995e+08	2022-04-22
2022-03-24	1.68724e+07	0			0.4	1908.5	4533.66	2.02469e+08	314.554	2.5		0	2022-03-24	0.606195		1	0.000148041	0.000162886	0.000402141	0.000402141	0.6	1	0.393805	0.97144	313300	0.0243025	2.5	0.984771	0.999997	0.984512	0.000402141	0.000337685	0.000401511	00:00:00	506561	00:00:00			3.34e+08	2022-04-22
2022-03-25	1.68728e+07	0			0.4	1900.02	4513.55	2.02473e+08	313.157	2.5		0	2022-03-25	0.606196		1	0.000147243	0.000162161	0.000401465	0.000401465	0.6	1	0.393804	0.97144	313600	0.0243025	2.5	0.984771	0.999997	0.984509	0.000401465	0.000336897	0.000400832	00:00:00	506569	00:00:00			3.34006e+08	2022-04-22
2022-03-26	1.68731e+07	0			0.4	1891.58	4493.52	2.02477e+08	311.765	2.5		0	2022-03-26	0.606198		1	0.000146449	0.000161439	0.00040079	0.00040079	0.6	1	0.393802	0.97144	313900	0.0243025	2.5	0.984771	0.999997	0.984506	0.00040079	0.000336111	0.000400155	00:00:00	506576	00:00:00			3.34011e+08	2022-04-22
2022-03-27	1.68734e+07	0			0.4	1883.18	4473.58	2.02481e+08	310.379	2.5		0	2022-03-27	0.606199		1	0.000145659	0.000160719	0.000400117	0.000400117	0.6	1	0.393801	0.97144	314200	0.0243025	2.5	0.984771	0.999997	0.984503	0.000400117	0.000335327	0.000399478	00:00:00	506584	00:00:00			3.34017e+08	2022-04-22
2022-03-28	1.68737e+07	0			0.4	1874.81	4453.72	2.02484e+08	308.999	2.5		0	2022-03-28	0.6062		1	0.000144873	0.000160003	0.000399445	0.000399445	0.6	1	0.3938	0.97144	314500	0.0243025	2.5	0.984771	0.999997	0.9845	0.000399445	0.000334545	0.000398803	00:00:00	506592	00:00:00			3.34022e+08	2022-04-22
2022-03-29	1.6874e+07	0			0.4	1866.48	4433.94	2.02488e+08	307.625	2.5		0	2022-03-29	0.606201		1	0.000144092	0.00015929	0.000398774	0.000398774	0.6	1	0.393799	0.97144	314800	0.0243025	2.5	0.984771	0.999997	0.984497	0.000398774	0.000333765	0.00039813	00:00:00	506600	00:00:00			3.34028e+08	2022-04-22
2022-03-30	1.68743e+07	0			0.4	1858.18	4414.25	2.02492e+08	306.257	2.5		0	2022-03-30	0.606202		1	0.000143315	0.00015858	0.000398104	0.000398104	0.6	1	0.393798	0.97144	315100	0.0243025	2.5	0.984771	0.999997	0.984495	0.000398104	0.000332987	0.000397458	00:00:00	506608	00:00:00			3.34033e+08	2022-04-22
2022-03-31	1.68746e+07	0			0.4	1849.92	4394.64	2.02495e+08	304.895	2.5		0	2022-03-31	0.606203		1	0.000142542	0.000157873	0.000397436	0.000397436	0.6	1	0.393797	0.97144	315400	0.0243025	2.5	0.984771	0.999997	0.984492	0.000397436	0.000332211	0.000396787	00:00:00	506616	00:00:00			3.34039e+08	2022-04-22
2022-04-01	1.68749e+07	0			0.4	1841.7	4375.11	2.02499e+08	303.539	2.5		0	2022-04-01	0.606204		1	0.000141773	0.000157169	0.000396769	0.000396769	0.6	1	0.393796	0.97144	315700	0.0243025	2.5	0.984771	0.999998	0.98449	0.000396769	0.000331436	0.000396117	00:00:00	506623	00:00:00			3.34044e+08	2022-04-22
2022-04-02	1.68752e+07	0			0.4	1833.5	4355.67	2.02503e+08	302.188	2.5		0	2022-04-02	0.606205		1	0.000141009	0.000156468	0.000396103	0.000396103	0.6	1	0.393795	0.97144	316000	0.0243025	2.5	0.984771	0.999998	0.984488	0.000396103	0.000330664	0.000395448	00:00:00	506631	00:00:00			3.3405e+08	2022-04-22
2022-04-03	1.68755e+07	0			0.4	1825.35	4336.31	2.02506e+08	300.844	2.5		0	2022-04-03	0.606206		1	0.000140248	0.00015577	0.000395439	0.000395439	0.6	1	0.393794	0.97144	316300	0.0243025	2.5	0.984771	0.999998	0.984486	0.000395439	0.000329893	0.000394781	00:00:00	506639	00:00:00			3.34055e+08	2022-04-22
2022-04-04	1.68758e+07	0			0.4	1817.23	4317.03	2.0251e+08	299.505	2.5		0	2022-04-04	0.606207		1	0.000139492	0.000155075	0.000394775	0.000394775	0.6	1	0.393793	0.97144	316600	0.0243025	2.5	0.984771	0.999998	0.984484	0.000394775	0.000329125	0.000394115	00:00:00	506646	00:00:00			3.34061e+08	2022-04-22
2022-04-05	1.68761e+07	0			0.4	1809.14	4297.84	2.02513e+08	298.172	2.5		0	2022-04-05	0.606207		1	0.00013874	0.000154383	0.000394113	0.000394113	0.6	1	0.393793	0.97144	316900	0.0243025	2.5	0.984771	0.999998	0.984482	0.000394113	0.000328358	0.000393451	00:00:00	506654	00:00:00			3.34066e+08	2022-04-22
2022-04-06	1.68764e+07	0			0.4	1801.09	4278.72	2.02517e+08	296.845	2.5		0	2022-04-06	0.606208		1	0.000137992	0.000153694	0.000393453	0.000393453	0.6	1	0.393792	0.97144	317200	0.0243025	2.5	0.984771	0.999998	0.98448	0.000393453	0.000327594	0.000392787	00:00:00	506662	00:00:00			3.34072e+08	2022-04-22
2022-04-07	1.68767e+07	0			0.4	1793.08	4259.69	2.0252e+08	295.523	2.5		0	2022-04-07	0.606209		1	0.000137248	0.000153008	0.000392793	0.000392793	0.6	1	0.393791	0.97144	317500	0.0243025	2.5	0.984771	0.999998	0.984478	0.000392793	0.000326831	0.000392125	00:00:00	506669	00:00:00			3.34077e+08	2022-04-22
2022-04-08	1.6877e+07	0			0.4	1785.1	4240.75	2.02524e+08	294.208	2.5		0	2022-04-08	0.606209		1	0.000136508	0.000152324	0.000392135	0.000392135	0.6	1	0.393791	0.97144	317800	0.0243025	2.5	0.984771	0.999998	0.984477	0.000392135	0.00032607	0.000391464	00:00:00	506677	00:00:00			3.34083e+08	2022-04-22
2022-04-09	1.68773e+07	0			0.4	1777.15	4221.88	2.02528e+08	292.898	2.5		0	2022-04-09	0.60621		1	0.000135772	0.000151644	0.000391478	0.000391478	0.6	1	0.39379	0.97144	318100	0.0243025	2.5	0.984771	0.999999	0.984476	0.000391478	0.000325311	0.000390804	00:00:00	506684	00:00:00			3.34088e+08	2022-04-22
2022-04-10	1.68776e+07	0			0.4	1769.24	4203.09	2.02531e+08	291.594	2.5		0	2022-04-10	0.60621		1	0.000135041	0.000150967	0.000390822	0.000390822	0.6	1	0.39379	0.97144	318400	0.0243025	2.5	0.984771	0.999999	0.984474	0.000390822	0.000324554	0.000390146	00:00:00	506692	00:00:00			3.34094e+08	2022-04-22
2022-04-11	1.68779e+07	0			0.4	1761.36	4184.39	2.02534e+08	290.295	2.5		0	2022-04-11	0.606211		1	0.000134313	0.000150293	0.000390167	0.000390167	0.6	1	0.393789	0.97144	318700	0.0243025	2.5	0.984771	0.999999	0.984473	0.000390167	0.000323799	0.000389489	00:00:00	506699	00:00:00			3.34099e+08	2022-04-22
2022-04-12	1.68782e+07	0			0.4	1753.52	4165.76	2.02538e+08	289.002	2.5		0	2022-04-12	0.606211		1	0.000133589	0.000149621	0.000389514	0.000389514	0.6	1	0.393789	0.97144	319000	0.0243025	2.5	0.984771	0.999999	0.984472	0.000389514	0.000323046	0.000388833	00:00:00	506706	00:00:00			3.34105e+08	2022-04-22
2022-04-13	1.68785e+07	0			0.4	1745.71	4147.22	2.02541e+08	287.715	2.5		0	2022-04-13	0.606212		1	0.000132869	0.000148953	0.000388862	0.000388862	0.6	1	0.393788	0.97144	319300	0.0243025	2.5	0.984771	0.999999	0.984471	0.000388862	0.000322294	0.000388178	00:00:00	506714	00:00:00			3.3411e+08	2022-04-22
2022-04-14	1.68787e+07	0			0.4	1737.94	4128.76	2.02545e+08	286.434	2.5		0	2022-04-14	0.606212		1	0.000132153	0.000148287	0.000388211	0.000388211	0.6	1	0.393788	0.97144	319600	0.0243025	2.5	0.984771	0.999999	0.98447	0.000388211	0.000321545	0.000387525	00:00:00	506721	00:00:00			3.34116e+08	2022-04-22
2022-04-15	1.6879e+07	0			0.4	1730.2	4110.38	2.02548e+08	285.158	2.5		0	2022-04-15	0.606212		1	0.000131441	0.000147625	0.000387561	0.000387561	0.6	1	0.393788	0.97144	319900	0.0243025	2.5	0.984771	0.999999	0.98447	0.000387561	0.000320797	0.000386873	00:00:00	506728	00:00:00			3.34121e+08	2022-04-22
2022-04-16	1.68793e+07	0			0.4	1722.49	4092.08	2.02552e+08	283.888	2.5		0	2022-04-16	0.606212		1	0.000130733	0.000146965	0.000386913	0.000386913	0.6	1	0.393788	0.97144	320200	0.0243025	2.5	0.984771	0.999999	0.984469	0.000386913	0.000320051	0.000386222	00:00:00	506736	00:00:00			3.34127e+08	2022-04-22
2022-04-17	1.68796e+07	0			0.4	1714.82	4073.86	2.02555e+08	282.623	2.5		0	2022-04-17	0.606213		1	0.000130029	0.000146308	0.000386266	0.000386266	0.6	1	0.393787	0.97144	320500	0.0243025	2.5	0.984771	1	0.984469	0.000386266	0.000319307	0.000385572	00:00:00	506743	00:00:00			3.34132e+08	2022-04-22
2022-04-18	1.68799e+07	0			0.4	1707.18	4055.72	2.02558e+08	281.364	2.5		0	2022-04-18	0.606213		1	0.000129329	0.000145654	0.00038562	0.00038562	0.6	1	0.393787	0.97144	320800	0.0243025	2.5	0.984771	1	0.984468	0.00038562	0.000318565	0.000384924	00:00:00	506750	00:00:00			3.34138e+08	2022-04-22
2022-04-19	1.68802e+07	0			0.4	1699.58	4037.66	2.02562e+08	280.111	2.5		0	2022-04-19	0.606213		1	0.000128633	0.000145003	0.000384975	0.000384975	0.6	1	0.393787	0.97144	321100	0.0243025	2.5	0.984771	1	0.984468	0.000384975	0.000317825	0.000384276	00:00:00	506757	00:00:00			3.34143e+08	2022-04-22
2022-04-20	1.68804e+07	0			0.4	1692.01	4019.68	2.02565e+08	278.863	2.5		0	2022-04-20	0.606213		1	0.00012794	0.000144355	0.000384331	0.000384331	0.6	1	0.393787	0.97144	321400	0.0243025	2.5	0.984771	1	0.984468	0.000384331	0.000317087	0.00038363	00:00:00	506764	00:00:00			3.34149e+08	2022-04-22
2022-04-21	1.68807e+07	0			0.4	1684.47	4001.77	2.02568e+08	277.621	2.5		0	2022-04-21	0.606213		1	0.000127252	0.00014371	0.000383689	0.000383689	0.6	1	0.393787	0.97144	321700	0.0243025	2.5	0.984771	1	0.984468	0.000383689	0.00031635	0.000382985	00:00:00	506771	00:00:00			3.34154e+08	2022-04-22
2022-04-22	1.6881e+07	0			0.4	1676.97	3983.95	2.02572e+08	276.385	2.5		0	2022-04-22	0.606213		1	0.000126567	0.000143068	0.000383048	0.000383048	0.6	1	0.393787	0.97144	322000	0.0243025	2.5	0.984771	1	0.984468	0.000383048	0.000315616	0.000382342	00:00:00	506778	00:00:00			3.3416e+08	2022-04-22
2022-04-23	1.68813e+07	0			0.4	1669.5	3966.21	2.02575e+08	275.154	2.5		0	2022-04-23	0.606213		1	0.000125886	0.000142428	0.000382408	0.000382408	0.6	1	0.393787	0.97144	322300	0.0243025	2.5	0.984771	1	0.984468	0.000382408	0.000314883	0.000381699	00:00:00	506785	00:00:00			3.34165e+08	2022-04-23
2022-04-24	1.68815e+07	0			0.4	1662.06	3948.54	2.02578e+08	273.928	2.5		0	2022-04-24	0.606213		1	0.000125209	0.000141791	0.000381769	0.000381769	0.6	1	0.393787	0.97144	322600	0.0243025	2.5	0.984771	1	0.984469	0.000381769	0.000314152	0.000381058	00:00:00	506792	00:00:00			3.34171e+08	2022-04-24
2022-04-25	1.68818e+07	0			0.4	1654.66	3930.96	2.02582e+08	272.708	2.5		0	2022-04-25	0.606212		1	0.000124535	0.000141158	0.000381131	0.000381131	0.6	1	0.393788	0.97144	322900	0.0243025	2.5	0.984771	1	0.984469	0.000381131	0.000313422	0.000380418	00:00:00	506799	00:00:00			3.34176e+08	2022-04-25
2022-04-26	1.68821e+07	0			0.4	1647.29	3913.45	2.02585e+08	271.493	2.5		0	2022-04-26	0.606212		1	0.000123865	0.000140526	0.000380495	0.000380495	0.6	1	0.393788	0.97144	323200	0.0243025	2.5	0.984771	1	0.984469	0.000380495	0.000312695	0.000379779	00:00:00	506806	00:00:00			3.34182e+08	2022-04-26
2022-04-27	1.68823e+07	0			0.4	1639.95	3896.02	2.02588e+08	270.284	2.5		0	2022-04-27	0.606212		1	0.000123199	0.000139898	0.00037986	0.00037986	0.6	1	0.393788	0.97144	323500	0.0243025	2.5	0.984771	1	0.98447	0.00037986	0.000311969	0.000379142	00:00:00	506813	00:00:00			3.34187e+08	2022-04-27
2022-04-28	1.68826e+07	0			0.4	1632.65	3878.66	2.02591e+08	269.081	2.5		0	2022-04-28	0.606212		1	0.000122537	0.000139273	0.000379226	0.000379226	0.6	1	0.393788	0.97144	323800	0.0243025	2.5	0.984771	1	0.984471	0.000379226	0.000311245	0.000378505	00:00:00	506820	00:00:00			3.34193e+08	2022-04-28
2022-04-29	1.68829e+07	0			0.4	1625.38	3861.39	2.02595e+08	267.882	2.5		0	2022-04-29	0.606211		1	0.000121878	0.00013865	0.000378593	0.000378593	0.6	1	0.393789	0.97144	324100	0.0243025	2.5	0.984771	1	0.984472	0.000378593	0.000310523	0.00037787	00:00:00	506827	00:00:00			3.34198e+08	2022-04-29
2022-04-30	1.68832e+07	0			0.4	1618.14	3844.19	2.02598e+08	266.69	2.5		0	2022-04-30	0.606211		1	0.000121223	0.00013803	0.000377962	0.000377962	0.6	1	0.393789	0.97144	324400	0.0243025	2.5	0.984771	1	0.984473	0.000377962	0.000309803	0.000377236	00:00:00	506834	00:00:00			3.34203e+08	2022-04-30
2022-05-01	1.68834e+07	0			0.4	1610.93	3827.07	2.02601e+08	265.502	2.5		0	2022-05-01	0.60621		1	0.000120572	0.000137413	0.000377331	0.000377331	0.6	1	0.39379	0.97144	324700	0.0243025	2.5	0.984771	1	0.984474	0.000377331	0.000309085	0.000376603	00:00:00	506840	00:00:00			3.34209e+08	2022-05-01
2022-05-02	1.68837e+07	0			0.4	1603.76	3810.02	2.02604e+08	264.32	2.5		0	2022-05-02	0.60621		1	0.000119924	0.000136799	0.000376702	0.000376702	0.6	1	0.39379	0.97144	325000	0.0243025	2.5	0.984771	1	0.984475	0.000376702	0.000308368	0.000375972	00:00:00	506847	00:00:00			3.34214e+08	2022-05-02
2022-05-03	1.68839e+07	0			0.4	1596.62	3793.06	2.02607e+08	263.144	2.5		0	2022-05-03	0.606209		1	0.00011928	0.000136188	0.000376074	0.000376074	0.6	1	0.393791	0.97144	325300	0.0243025	2.5	0.984771	1	0.984476	0.000376074	0.000307653	0.000375341	00:00:00	506854	00:00:00			3.3422e+08	2022-05-03
2022-05-04	1.68842e+07	0			0.4	1589.51	3776.16	2.0261e+08	261.972	2.5		0	2022-05-04	0.606209		1	0.00011864	0.000135579	0.000375447	0.000375447	0.6	1	0.393791	0.97144	325600	0.0243025	2.5	0.984771	1	0.984478	0.000375447	0.00030694	0.000374712	00:00:00	506861	00:00:00			3.34225e+08	2022-05-04
2022-05-05	1.68845e+07	0			0.4	1582.43	3759.35	2.02614e+08	260.806	2.5		0	2022-05-05	0.606208		1	0.000118003	0.000134973	0.000374821	0.000374821	0.6	1	0.393792	0.97144	325900	0.0243025	2.5	0.984771	1	0.984479	0.000374821	0.000306229	0.000374084	00:00:00	506867	00:00:00			3.34231e+08	2022-05-05
2022-05-06	1.68847e+07	0			0.4	1575.39	3742.61	2.02617e+08	259.646	2.5		0	2022-05-06	0.606208		1	0.000117369	0.00013437	0.000374197	0.000374197	0.6	1	0.393792	0.97144	326200	0.0243025	2.5	0.984771	1	0.984481	0.000374197	0.000305519	0.000373457	00:00:00	506874	00:00:00			3.34236e+08	2022-05-06
2022-05-07	1.6885e+07	0			0.4	1568.38	3725.95	2.0262e+08	258.49	2.5		0	2022-05-07	0.606207		1	0.00011674	0.000133769	0.000373573	0.000373573	0.6	1	0.393793	0.97144	326500	0.0243025	2.5	0.984771	1	0.984483	0.000373573	0.000304811	0.000372832	00:00:00	506880	00:00:00			3.34242e+08	2022-05-07
2022-05-08	1.68852e+07	0			0.4	1561.4	3709.36	2.02623e+08	257.34	2.5		0	2022-05-08	0.606206		1	0.000116113	0.000133172	0.000372951	0.000372951	0.6	1	0.393794	0.97144	326800	0.0243025	2.5	0.984771	1	0.984484	0.000372951	0.000304105	0.000372207	00:00:00	506887	00:00:00			3.34247e+08	2022-05-08
2022-05-09	1.68855e+07	0			0.4	1554.45	3692.85	2.02626e+08	256.195	2.5		0	2022-05-09	0.606206		1	0.000115491	0.000132577	0.00037233	0.00037233	0.6	1	0.393794	0.97144	327100	0.0243025	2.5	0.984771	1	0.984486	0.00037233	0.000303401	0.000371584	00:00:00	506894	00:00:00			3.34253e+08	2022-05-09
2022-05-10	1.68858e+07	0			0.4	1547.53	3676.41	2.02629e+08	255.056	2.5		0	2022-05-10	0.606205		1	0.000114871	0.000131984	0.00037171	0.00037171	0.6	1	0.393795	0.97144	327400	0.0243025	2.5	0.984771	1	0.984488	0.00037171	0.000302698	0.000370961	00:00:00	506900	00:00:00			3.34258e+08	2022-05-10
2022-05-11	1.6886e+07	0			0.4	1540.65	3660.05	2.02632e+08	253.921	2.5		0	2022-05-11	0.606204		1	0.000114256	0.000131395	0.000371091	0.000371091	0.6	1	0.393796	0.97144	327700	0.0243025	2.5	0.984771	1	0.98449	0.000371091	0.000301998	0.00037034	00:00:00	506907	00:00:00			3.34264e+08	2022-05-11
2022-05-12	1.68863e+07	0			0.4	1533.79	3643.76	2.02635e+08	252.792	2.5		0	2022-05-12	0.606203		1	0.000113643	0.000130808	0.000370474	0.000370474	0.6	1	0.393797	0.97144	328000	0.0243025	2.5	0.984771	1	0.984493	0.000370474	0.000301298	0.000369721	00:00:00	506913	00:00:00			3.34269e+08	2022-05-12
2022-05-13	1.68865e+07	0			0.4	1526.97	3627.54	2.02638e+08	251.668	2.5		0	2022-05-13	0.606202		1	0.000113035	0.000130224	0.000369857	0.000369857	0.6	1	0.393798	0.97144	328300	0.0243025	2.5	0.984771	1	0.984495	0.000369857	0.000300601	0.000369102	00:00:00	506919	00:00:00			3.34275e+08	2022-05-13
2022-05-14	1.68868e+07	0			0.4	1520.18	3611.4	2.02641e+08	250.55	2.5		0	2022-05-14	0.606201		1	0.000112429	0.000129642	0.000369242	0.000369242	0.6	1	0.393799	0.97144	328600	0.0243025	2.5	0.984771	1	0.984497	0.000369242	0.000299905	0.000368484	00:00:00	506926	00:00:00			3.3428e+08	2022-05-14
2022-05-15	1.6887e+07	0			0.4	1513.42	3595.34	2.02644e+08	249.436	2.5		0	2022-05-15	0.6062		1	0.000111827	0.000129063	0.000368628	0.000368628	0.6	1	0.3938	0.97144	328900	0.0243025	2.5	0.984771	1	0.9845	0.000368628	0.000299211	0.000367868	00:00:00	506932	00:00:00			3.34286e+08	2022-05-15
2022-05-16	1.68873e+07	0			0.4	1506.69	3579.34	2.02647e+08	248.327	2.5		0	2022-05-16	0.606199		1	0.000111229	0.000128487	0.000368015	0.000368015	0.6	1	0.393801	0.97144	329200	0.0243025	2.5	0.984771	1	0.984503	0.000368015	0.000298519	0.000367253	00:00:00	506939	00:00:00			3.34291e+08	2022-05-16
2022-05-17	1.68875e+07	0			0.4	1500	3563.42	2.0265e+08	247.224	2.5		0	2022-05-17	0.606198		1	0.000110633	0.000127914	0.000367403	0.000367403	0.6	1	0.393802	0.97144	329500	0.0243025	2.5	0.984771	1	0.984505	0.000367403	0.000297829	0.000366639	00:00:00	506945	00:00:00			3.34297e+08	2022-05-17
2022-05-18	1.68878e+07	0			0.4	1493.33	3547.58	2.02653e+08	246.126	2.5		0	2022-05-18	0.606197		1	0.000110041	0.000127343	0.000366792	0.000366792	0.6	1	0.393803	0.97144	329800	0.0243025	2.5	0.984771	1	0.984508	0.000366792	0.00029714	0.000366026	00:00:00	506951	00:00:00			3.34302e+08	2022-05-18
2022-05-19	1.6888e+07	0			0.4	1486.7	3531.8	2.02656e+08	245.033	2.5		0	2022-05-19	0.606196		1	0.000109453	0.000126774	0.000366182	0.000366182	0.6	1	0.393804	0.97144	330100	0.0243025	2.5	0.984771	1	0.984511	0.000366182	0.000296453	0.000365414	00:00:00	506957	00:00:00			3.34308e+08	2022-05-19
2022-05-20	1.68882e+07	0			0.4	1480.09	3516.1	2.02659e+08	243.945	2.5		0	2022-05-20	0.606194		1	0.000108868	0.000126209	0.000365574	0.000365574	0.6	1	0.393806	0.97144	330400	0.0243025	2.5	0.984771	1	0.984514	0.000365574	0.000295767	0.000364803	00:00:00	506964	00:00:00			3.34313e+08	2022-05-20
2022-05-21	1.68885e+07	0			0.4	1473.52	3500.47	2.02662e+08	242.862	2.5		0	2022-05-21	0.606193		1	0.000108286	0.000125646	0.000364967	0.000364967	0.6	1	0.393807	0.97144	330700	0.0243025	2.5	0.984771	1	0.984517	0.000364967	0.000295084	0.000364194	00:00:00	506970	00:00:00			3.34319e+08	2022-05-21
2022-05-22	1.68887e+07	0			0.4	1466.97	3484.92	2.02665e+08	241.784	2.5		0	2022-05-22	0.606192		1	0.000107707	0.000125085	0.00036436	0.00036436	0.6	1	0.393808	0.97144	331000	0.0243025	2.5	0.984771	1	0.98452	0.00036436	0.000294402	0.000363585	00:00:00	506976	00:00:00			3.34324e+08	2022-05-22
2022-05-23	1.6889e+07	0			0.4	1460.46	3469.43	2.02668e+08	240.711	2.5		0	2022-05-23	0.606191		1	0.000107132	0.000124527	0.000363755	0.000363755	0.6	1	0.393809	0.97144	331300	0.0243025	2.5	0.984771	1	0.984524	0.000363755	0.000293721	0.000362978	00:00:00	506982	00:00:00			3.3433e+08	2022-05-23
2022-05-24	1.68892e+07	0			0.4	1453.98	3454.02	2.0267e+08	239.643	2.5		0	2022-05-24	0.606189		1	0.00010656	0.000123972	0.000363151	0.000363151	0.6	1	0.393811	0.97144	331600	0.0243025	2.5	0.984771	1	0.984527	0.000363151	0.000293042	0.000362372	00:00:00	506988	00:00:00			3.34335e+08	2022-05-24
2022-05-25	1.68894e+07	0			0.4	1447.52	3438.68	2.02673e+08	238.58	2.5		0	2022-05-25	0.606188		1	0.000105991	0.000123419	0.000362548	0.000362548	0.6	1	0.393812	0.97144	331900	0.0243025	2.5	0.984771	1	0.984531	0.000362548	0.000292365	0.000361767	00:00:00	506994	00:00:00			3.34341e+08	2022-05-25
2022-05-26	1.68897e+07	0			0.4	1441.1	3423.41	2.02676e+08	237.522	2.5		0	2022-05-26	0.606186		1	0.000105425	0.000122869	0.000361947	0.000361947	0.6	1	0.393814	0.97144	332200	0.0243025	2.5	0.984771	1	0.984534	0.000361947	0.00029169	0.000361163	00:00:00	507000	00:00:00			3.34346e+08	2022-05-26
2022-05-27	1.68899e+07	0			0.4	1434.71	3408.21	2.02679e+08	236.469	2.5		0	2022-05-27	0.606185		1	0.000104863	0.000122322	0.000361346	0.000361346	0.6	1	0.393815	0.97144	332500	0.0243025	2.5	0.984771	1	0.984538	0.000361346	0.000291016	0.00036056	00:00:00	507006	00:00:00			3.34352e+08	2022-05-27
2022-05-28	1.68902e+07	0			0.4	1428.34	3393.08	2.02682e+08	235.421	2.5		0	2022-05-28	0.606183		1	0.000104304	0.000121777	0.000360747	0.000360747	0.6	1	0.393817	0.97144	332800	0.0243025	2.5	0.984771	1	0.984542	0.000360747	0.000290344	0.000359959	00:00:00	507012	00:00:00			3.34357e+08	2022-05-28
2022-05-29	1.68904e+07	0			0.4	1422.01	3378.02	2.02685e+08	234.378	2.5		0	2022-05-29	0.606182		1	0.000103748	0.000121234	0.000360148	0.000360148	0.6	1	0.393818	0.97144	333100	0.0243025	2.5	0.984771	1	0.984546	0.000360148	0.000289674	0.000359358	00:00:00	507018	00:00:00			3.34363e+08	2022-05-29
2022-05-30	1.68906e+07	0			0.4	1415.71	3363.03	2.02687e+08	233.339	2.5		0	2022-05-30	0.60618		1	0.000103195	0.000120694	0.000359551	0.000359551	0.6	1	0.39382	0.97144	333400	0.0243025	2.5	0.984771	1	0.98455	0.000359551	0.000289005	0.000358759	00:00:00	507024	00:00:00			3.34368e+08	2022-05-30
2022-05-31	1.68909e+07	0			0.4	1409.43	3348.12	2.0269e+08	232.306	2.5		0	2022-05-31	0.606179		1	0.000102645	0.000120157	0.000358955	0.000358955	0.6	1	0.393821	0.97144	333700	0.0243025	2.5	0.984771	1	0.984554	0.000358955	0.000288338	0.000358161	00:00:00	507030	00:00:00			3.34374e+08	2022-05-31
2022-06-01	1.68911e+07	0			0.4	1403.19	3333.27	2.02693e+08	231.277	2.5		0	2022-06-01	0.606177		1	0.000102099	0.000119622	0.00035836	0.00035836	0.6	1	0.393823	0.97144	334000	0.0243025	2.5	0.984771	1	0.984558	0.00035836	0.000287673	0.000357564	00:00:00	507036	00:00:00			3.34379e+08	2022-06-01
2022-06-02	1.68913e+07	0			0.4	1396.97	3318.49	2.02696e+08	230.253	2.5		0	2022-06-02	0.606175		1	0.000101555	0.00011909	0.000357766	0.000357766	0.6	1	0.393825	0.97144	334300	0.0243025	2.5	0.984771	1	0.984562	0.000357766	0.000287009	0.000356968	00:00:00	507042	00:00:00			3.34385e+08	2022-06-02
2022-06-03	1.68915e+07	0			0.4	1390.79	3303.78	2.02699e+08	229.235	2.5		0	2022-06-03	0.606173		1	0.000101015	0.00011856	0.000357173	0.000357173	0.6	1	0.393827	0.97144	334600	0.0243025	2.5	0.984771	1	0.984566	0.000357173	0.000286347	0.000356373	00:00:00	507048	00:00:00			3.3439e+08	2022-06-03
2022-06-04	1.68918e+07	0			0.4	1384.63	3289.14	2.02701e+08	228.22	2.5		0	2022-06-04	0.606172		1	0.000100478	0.000118033	0.000356581	0.000356581	0.6	1	0.393828	0.97144	334900	0.0243025	2.5	0.984771	1	0.984571	0.000356581	0.000285686	0.000355779	00:00:00	507054	00:00:00			3.34396e+08	2022-06-04
2022-06-05	1.6892e+07	0			0.4	1378.5	3274.56	2.02704e+08	227.211	2.5		0	2022-06-05	0.60617		1	9.99435e-05	0.000117508	0.00035599	0.00035599	0.6	1	0.39383	0.97144	335200	0.0243025	2.5	0.984771	1	0.984575	0.00035599	0.000285027	0.000355186	00:00:00	507060	00:00:00			3.34401e+08	2022-06-05
2022-06-06	1.68922e+07	0			0.4	1372.4	3260.06	2.02707e+08	226.207	2.5		0	2022-06-06	0.606168		1	9.94123e-05	0.000116985	0.000355401	0.000355401	0.6	1	0.393832	0.97144	335500	0.0243025	2.5	0.984771	1	0.98458	0.000355401	0.00028437	0.000354594	00:00:00	507065	00:00:00			3.34407e+08	2022-06-06
2022-06-07	1.68925e+07	0			0.4	1366.33	3245.62	2.02709e+08	225.207	2.5		0	2022-06-07	0.606166		1	9.88842e-05	0.000116465	0.000354812	0.000354812	0.6	1	0.393834	0.97144	335800	0.0243025	2.5	0.984771	1	0.984585	0.000354812	0.000283714	0.000354004	00:00:00	507071	00:00:00			3.34412e+08	2022-06-07
2022-06-08	1.68927e+07	0			0.4	1360.29	3231.26	2.02712e+08	224.212	2.5		0	2022-06-08	0.606164		1	9.83591e-05	0.000115948	0.000354225	0.000354225	0.6	1	0.393836	0.97144	336100	0.0243025	2.5	0.984771	1	0.984589	0.000354225	0.00028306	0.000353415	00:00:00	507077	00:00:00			3.34418e+08	2022-06-08
2022-06-09	1.68929e+07	0			0.4	1354.28	3216.96	2.02715e+08	223.221	2.5		0	2022-06-09	0.606162		1	9.78369e-05	0.000115433	0.000353638	0.000353638	0.6	1	0.393838	0.97144	336400	0.0243025	2.5	0.984771	1	0.984594	0.000353638	0.000282408	0.000352826	00:00:00	507082	00:00:00			3.34423e+08	2022-06-09
2022-06-10	1.68931e+07	0			0.4	1348.29	3202.72	2.02717e+08	222.236	2.5		0	2022-06-10	0.60616		1	9.73178e-05	0.00011492	0.000353053	0.000353053	0.6	1	0.39384	0.97144	336700	0.0243025	2.5	0.984771	1.00001	0.984599	0.000353053	0.000281757	0.000352239	00:00:00	507088	00:00:00			3.34429e+08	2022-06-10
2022-06-11	1.68933e+07	0			0.4	1342.34	3188.56	2.0272e+08	221.255	2.5		0	2022-06-11	0.606158		1	9.68016e-05	0.00011441	0.000352469	0.000352469	0.6	1	0.393842	0.97144	337000	0.0243025	2.5	0.984771	1.00001	0.984604	0.000352469	0.000281108	0.000351653	00:00:00	507094	00:00:00			3.34434e+08	2022-06-11
2022-06-12	1.68936e+07	0			0.4	1336.41	3174.46	2.02723e+08	220.278	2.5		0	2022-06-12	0.606156		1	9.62884e-05	0.000113902	0.000351886	0.000351886	0.6	1	0.393844	0.97144	337300	0.0243025	2.5	0.984771	1.00001	0.984609	0.000351886	0.00028046	0.000351068	00:00:00	507099	00:00:00			3.3444e+08	2022-06-12
2022-06-13	1.68938e+07	0			0.4	1330.51	3160.43	2.02725e+08	219.307	2.5		0	2022-06-13	0.606154		1	9.57781e-05	0.000113397	0.000351304	0.000351304	0.6	1	0.393846	0.97144	337600	0.0243025	2.5	0.984771	1.00001	0.984615	0.000351304	0.000279814	0.000350484	00:00:00	507105	00:00:00			3.34445e+08	2022-06-13
2022-06-14	1.6894e+07	0			0.4	1324.64	3146.46	2.02728e+08	218.34	2.5		0	2022-06-14	0.606152		1	9.52708e-05	0.000112894	0.000350723	0.000350723	0.6	1	0.393848	0.97144	337900	0.0243025	2.5	0.984771	1.00001	0.98462	0.000350723	0.000279169	0.000349901	00:00:00	507111	00:00:00			3.34451e+08	2022-06-14
2022-06-15	1.68942e+07	0			0.4	1318.79	3132.56	2.02731e+08	217.377	2.5		0	2022-06-15	0.60615		1	9.47663e-05	0.000112393	0.000350143	0.000350143	0.6	1	0.39385	0.97144	338200	0.0243025	2.5	0.984771	1.00001	0.984625	0.000350143	0.000278526	0.000349319	00:00:00	507116	00:00:00			3.34456e+08	2022-06-15
2022-06-16	1.68944e+07	0			0.4	1312.98	3118.73	2.02733e+08	216.42	2.5		0	2022-06-16	0.606148		1	9.42647e-05	0.000111895	0.000349564	0.000349564	0.6	1	0.393852	0.97144	338500	0.0243025	2.5	0.984771	1.00001	0.984631	0.000349564	0.000277885	0.000348738	00:00:00	507122	00:00:00			3.34462e+08	2022-06-16
2022-06-17	1.68947e+07	0			0.4	1307.19	3104.96	2.02736e+08	215.466	2.5		0	2022-06-17	0.606145		1	9.37661e-05	0.000111399	0.000348986	0.000348986	0.6	1	0.393855	0.97144	338800	0.0243025	2.5	0.984771	1.00001	0.984637	0.000348986	0.000277245	0.000348159	00:00:00	507127	00:00:00			3.34467e+08	2022-06-17
2022-06-18	1.68949e+07	0			0.4	1301.43	3091.25	2.02738e+08	214.518	2.5		0	2022-06-18	0.606143		1	9.32702e-05	0.000110906	0.00034841	0.00034841	0.6	1	0.393857	0.97144	339100	0.0243025	2.5	0.984771	1.00001	0.984642	0.00034841	0.000276607	0.00034758	00:00:00	507133	00:00:00			3.34473e+08	2022-06-18
2022-06-19	1.68951e+07	0			0.4	1295.69	3077.62	2.02741e+08	213.573	2.5		0	2022-06-19	0.606141		1	9.27773e-05	0.000110415	0.000347834	0.000347834	0.6	1	0.393859	0.97144	339400	0.0243025	2.5	0.984771	1.00001	0.984648	0.000347834	0.00027597	0.000347002	00:00:00	507138	00:00:00			3.34478e+08	2022-06-19
2022-06-20	1.68953e+07	0			0.4	1289.99	3064.04	2.02743e+08	212.634	2.5		0	2022-06-20	0.606138		1	9.22871e-05	0.000109926	0.00034726	0.00034726	0.6	1	0.393862	0.97144	339700	0.0243025	2.5	0.984771	1.00001	0.984654	0.00034726	0.000275335	0.000346426	00:00:00	507144	00:00:00			3.34484e+08	2022-06-20
2022-06-21	1.68955e+07	0			0.4	1284.31	3050.54	2.02746e+08	211.699	2.5		0	2022-06-21	0.606136		1	9.17998e-05	0.00010944	0.000346686	0.000346686	0.6	1	0.393864	0.97144	340000	0.0243025	2.5	0.984771	1.00001	0.98466	0.000346686	0.000274702	0.000345851	00:00:00	507149	00:00:00			3.34489e+08	2022-06-21
2022-06-22	1.68957e+07	0			0.4	1278.66	3037.09	2.02749e+08	210.768	2.5		0	2022-06-22	0.606134		1	9.13152e-05	0.000108956	0.000346114	0.000346114	0.6	1	0.393866	0.97144	340300	0.0243025	2.5	0.984771	1.00001	0.984666	0.000346114	0.00027407	0.000345276	00:00:00	507154	00:00:00			3.34495e+08	2022-06-22
2022-06-23	1.68959e+07	0			0.4	1273.03	3023.71	2.02751e+08	209.842	2.5		0	2022-06-23	0.606131		1	9.08335e-05	0.000108474	0.000345542	0.000345542	0.6	1	0.393869	0.97144	340600	0.0243025	2.5	0.984771	1.00001	0.984672	0.000345542	0.000273439	0.000344703	00:00:00	507160	00:00:00			3.345e+08	2022-06-23
2022-06-24	1.68961e+07	0			0.4	1267.44	3010.4	2.02754e+08	208.92	2.5		0	2022-06-24	0.606129		1	9.03545e-05	0.000107994	0.000344972	0.000344972	0.6	1	0.393871	0.97144	340900	0.0243025	2.5	0.984771	1.00001	0.984678	0.000344972	0.00027281	0.000344131	00:00:00	507165	00:00:00			3.34506e+08	2022-06-24
2022-06-25	1.68963e+07	0			0.4	1261.86	2997.14	2.02756e+08	208.003	2.5		0	2022-06-25	0.606126		1	8.98783e-05	0.000107517	0.000344402	0.000344402	0.6	1	0.393874	0.97144	341200	0.0243025	2.5	0.984771	1.00001	0.984684	0.000344402	0.000272183	0.000343559	00:00:00	507170	00:00:00			3.34511e+08	2022-06-25
2022-06-26	1.68965e+07	0			0.4	1256.32	2983.95	2.02759e+08	207.09	2.5		0	2022-06-26	0.606124		1	8.94048e-05	0.000107042	0.000343834	0.000343834	0.6	1	0.393876	0.97144	341500	0.0243025	2.5	0.984771	1.00001	0.984691	0.000343834	0.000271557	0.000342989	00:00:00	507176	00:00:00			3.34517e+08	2022-06-26
2022-06-27	1.68968e+07	0			0.4	1250.8	2970.83	2.02761e+08	206.181	2.5		0	2022-06-27	0.606121		1	8.8934e-05	0.00010657	0.000343267	0.000343267	0.6	1	0.393879	0.97144	341800	0.0243025	2.5	0.984771	1.00001	0.984697	0.000343267	0.000270933	0.00034242	00:00:00	507181	00:00:00			3.34522e+08	2022-06-27
2022-06-28	1.6897e+07	0			0.4	1245.31	2957.77	2.02764e+08	205.277	2.5		0	2022-06-28	0.606119		1	8.84659e-05	0.000106099	0.000342701	0.000342701	0.6	1	0.393881	0.97144	342100	0.0243025	2.5	0.984771	1.00001	0.984704	0.000342701	0.00027031	0.000341852	00:00:00	507186	00:00:00			3.34528e+08	2022-06-28
2022-06-29	1.68972e+07	0			0.4	1239.85	2944.77	2.02766e+08	204.377	2.5		0	2022-06-29	0.606116		1	8.80006e-05	0.000105631	0.000342136	0.000342136	0.6	1	0.393884	0.97144	342400	0.0243025	2.5	0.984771	1.00001	0.98471	0.000342136	0.000269688	0.000341285	00:00:00	507191	00:00:00			3.34533e+08	2022-06-29
2022-06-30	1.68974e+07	0			0.4	1234.41	2931.83	2.02768e+08	203.482	2.5		0	2022-06-30	0.606113		1	8.75379e-05	0.000105166	0.000341571	0.000341571	0.6	1	0.393887	0.97144	342700	0.0243025	2.5	0.984771	1.00001	0.984717	0.000341571	0.000269069	0.000340719	00:00:00	507196	00:00:00			3.34539e+08	2022-06-30
2022-07-01	1.68976e+07	0			0.4	1229	2918.95	2.02771e+08	202.591	2.5		0	2022-07-01	0.606111		1	8.70779e-05	0.000104702	0.000341008	0.000341008	0.6	1	0.393889	0.97144	343000	0.0243025	2.5	0.984771	1.00001	0.984723	0.000341008	0.00026845	0.000340154	00:00:00	507202	00:00:00			3.34544e+08	2022-07-01
2022-07-02	1.68978e+07	0			0.4	1223.61	2906.14	2.02773e+08	201.704	2.5		0	2022-07-02	0.606108		1	8.66205e-05	0.000104241	0.000340446	0.000340446	0.6	1	0.393892	0.97144	343300	0.0243025	2.5	0.984771	1.00001	0.98473	0.000340446	0.000267834	0.000339591	00:00:00	507207	00:00:00			3.3455e+08	2022-07-02
2022-07-03	1.6898e+07	0			0.4	1218.25	2893.39	2.02776e+08	200.821	2.5		0	2022-07-03	0.606105		1	8.61658e-05	0.000103781	0.000339885	0.000339885	0.6	1	0.393895	0.97144	343600	0.0243025	2.5	0.984771	1.00001	0.984737	0.000339885	0.000267218	0.000339028	00:00:00	507212	00:00:00			3.34555e+08	2022-07-03
2022-07-04	1.68982e+07	0			0.4	1212.92	2880.7	2.02778e+08	199.943	2.5		0	2022-07-04	0.606102		1	8.57137e-05	0.000103325	0.000339325	0.000339325	0.6	1	0.393898	0.97144	343900	0.0243025	2.5	0.984771	1.00001	0.984744	0.000339325	0.000266605	0.000338466	00:00:00	507217	00:00:00			3.34561e+08	2022-07-04
2022-07-05	1.68984e+07	0			0.4	1207.61	2868.07	2.0278e+08	199.069	2.5		0	2022-07-05	0.606099		1	8.52641e-05	0.00010287	0.000338766	0.000338766	0.6	1	0.393901	0.97144	344200	0.0243025	2.5	0.984771	1.00001	0.984751	0.000338766	0.000265992	0.000337905	00:00:00	507222	00:00:00			3.34566e+08	2022-07-05
2022-07-06	1.68986e+07	0			0.4	1202.33	2855.5	2.02783e+08	198.199	2.5		0	2022-07-06	0.606097		1	8.48172e-05	0.000102417	0.000338208	0.000338208	0.6	1	0.393903	0.97144	344500	0.0243025	2.5	0.984771	1.00001	0.984758	0.000338208	0.000265382	0.000337345	00:00:00	507227	00:00:00			3.34572e+08	2022-07-06
2022-07-07	1.68988e+07	0			0.4	1197.07	2842.99	2.02785e+08	197.334	2.5		0	2022-07-07	0.606094		1	8.43729e-05	0.000101967	0.000337651	0.000337651	0.6	1	0.393906	0.97144	344800	0.0243025	2.5	0.984771	1.00001	0.984766	0.000337651	0.000264772	0.000336787	00:00:00	507232	00:00:00			3.34577e+08	2022-07-07
2022-07-08	1.6899e+07	0			0.4	1191.84	2830.54	2.02788e+08	196.472	2.5		0	2022-07-08	0.606091		1	8.39311e-05	0.000101519	0.000337095	0.000337095	0.6	1	0.393909	0.97144	345100	0.0243025	2.5	0.984771	1.00001	0.984773	0.000337095	0.000264164	0.000336229	00:00:00	507237	00:00:00			3.34583e+08	2022-07-08
2022-07-09	1.68992e+07	0			0.4	1186.63	2818.15	2.0279e+08	195.615	2.5		0	2022-07-09	0.606088		1	8.34919e-05	0.000101073	0.000336541	0.000336541	0.6	1	0.393912	0.97144	345400	0.0243025	2.5	0.984771	1.00001	0.98478	0.000336541	0.000263558	0.000335672	00:00:00	507242	00:00:00			3.34588e+08	2022-07-09
2022-07-10	1.68994e+07	0			0.4	1181.45	2805.83	2.02792e+08	194.762	2.5		0	2022-07-10	0.606085		1	8.30552e-05	0.000100629	0.000335987	0.000335987	0.6	1	0.393915	0.97144	345700	0.0243025	2.5	0.984771	1.00001	0.984788	0.000335987	0.000262953	0.000335117	00:00:00	507247	00:00:00			3.34594e+08	2022-07-10
2022-07-11	1.68995e+07	0			0.4	1176.29	2793.56	2.02795e+08	193.913	2.5		0	2022-07-11	0.606082		1	8.26211e-05	0.000100188	0.000335434	0.000335434	0.6	1	0.393918	0.97144	346000	0.0243025	2.5	0.984771	1.00001	0.984795	0.000335434	0.00026235	0.000334562	00:00:00	507252	00:00:00			3.34599e+08	2022-07-11
2022-07-12	1.68997e+07	0			0.4	1171.16	2781.35	2.02797e+08	193.068	2.5		0	2022-07-12	0.606079		1	8.21894e-05	9.97481e-05	0.000334882	0.000334882	0.6	1	0.393921	0.97144	346300	0.0243025	2.5	0.984771	1.00001	0.984803	0.000334882	0.000261748	0.000334009	00:00:00	507257	00:00:00			3.34605e+08	2022-07-12
2022-07-13	1.68999e+07	0			0.4	1166.06	2769.2	2.02799e+08	192.228	2.5		0	2022-07-13	0.606076		1	8.17603e-05	9.93107e-05	0.000334331	0.000334331	0.6	1	0.393924	0.97144	346600	0.0243025	2.5	0.984771	1.00001	0.984811	0.000334331	0.000261148	0.000333456	00:00:00	507262	00:00:00			3.3461e+08	2022-07-13
2022-07-14	1.69001e+07	0			0.4	1160.98	2757.11	2.02801e+08	191.391	2.5		0	2022-07-14	0.606073		1	8.13336e-05	9.88755e-05	0.000333781	0.000333781	0.6	1	0.393927	0.97144	346900	0.0243025	2.5	0.984771	1.00001	0.984818	0.000333781	0.000260549	0.000332905	00:00:00	507267	00:00:00			3.34616e+08	2022-07-14
2022-07-15	1.69003e+07	0			0.4	1155.92	2745.08	2.02804e+08	190.558	2.5		0	2022-07-15	0.60607		1	8.09094e-05	9.84424e-05	0.000333232	0.000333232	0.6	1	0.39393	0.97144	347200	0.0243025	2.5	0.984771	1.00001	0.984826	0.000333232	0.000259951	0.000332354	00:00:00	507272	00:00:00			3.34621e+08	2022-07-15
2022-07-16	1.69005e+07	0			0.4	1150.89	2733.1	2.02806e+08	189.73	2.5		0	2022-07-16	0.606066		1	8.04877e-05	9.80114e-05	0.000332684	0.000332684	0.6	1	0.393934	0.97144	347500	0.0243025	2.5	0.984771	1.00001	0.984834	0.000332684	0.000259355	0.000331804	00:00:00	507277	00:00:00			3.34627e+08	2022-07-16
2022-07-17	1.69007e+07	0			0.4	1145.88	2721.19	2.02808e+08	188.906	2.5		0	2022-07-17	0.606063		1	8.00683e-05	9.75825e-05	0.000332138	0.000332138	0.6	1	0.393937	0.97144	347800	0.0243025	2.5	0.984771	1.00001	0.984842	0.000332138	0.00025876	0.000331256	00:00:00	507281	00:00:00			3.34632e+08	2022-07-17
2022-07-18	1.69009e+07	0			0.4	1140.9	2709.33	2.02811e+08	188.085	2.5		0	2022-07-18	0.60606		1	7.96515e-05	9.71557e-05	0.000331592	0.000331592	0.6	1	0.39394	0.97144	348100	0.0243025	2.5	0.984771	1.00001	0.98485	0.000331592	0.000258167	0.000330708	00:00:00	507286	00:00:00			3.34638e+08	2022-07-18
2022-07-19	1.69011e+07	0			0.4	1135.94	2697.53	2.02813e+08	187.269	2.5		0	2022-07-19	0.606057		1	7.9237e-05	9.67309e-05	0.000331047	0.000331047	0.6	1	0.393943	0.97144	348400	0.0243025	2.5	0.984771	1.00001	0.984858	0.000331047	0.000257575	0.000330162	00:00:00	507291	00:00:00			3.34643e+08	2022-07-19
2022-07-20	1.69013e+07	0			0.4	1131	2685.79	2.02815e+08	186.457	2.5		0	2022-07-20	0.606053		1	7.88249e-05	9.63083e-05	0.000330503	0.000330503	0.6	1	0.393947	0.97144	348700	0.0243025	2.5	0.984771	1.00001	0.984866	0.000330503	0.000256985	0.000329616	00:00:00	507296	00:00:00			3.34649e+08	2022-07-20
2022-07-21	1.69014e+07	0			0.4	1126.09	2674.1	2.02817e+08	185.648	2.5		0	2022-07-21	0.60605		1	7.84152e-05	9.58877e-05	0.00032996	0.00032996	0.6	1	0.39395	0.97144	349000	0.0243025	2.5	0.984771	1.00001	0.984875	0.00032996	0.000256396	0.000329072	00:00:00	507300	00:00:00			3.34654e+08	2022-07-21
2022-07-22	1.69016e+07	0			0.4	1121.21	2662.47	2.0282e+08	184.844	2.5		0	2022-07-22	0.606047		1	7.80079e-05	9.54691e-05	0.000329418	0.000329418	0.6	1	0.393953	0.97144	349300	0.0243025	2.5	0.984771	1.00001	0.984883	0.000329418	0.000255809	0.000328528	00:00:00	507305	00:00:00			3.3466e+08	2022-07-22
2022-07-23	1.69018e+07	0			0.4	1116.35	2650.9	2.02822e+08	184.043	2.5		0	2022-07-23	0.606043		1	7.76029e-05	9.50526e-05	0.000328877	0.000328877	0.6	1	0.393957	0.97144	349600	0.0243025	2.5	0.984771	1.00001	0.984891	0.000328877	0.000255223	0.000327986	00:00:00	507310	00:00:00			3.34665e+08	2022-07-23
2022-07-24	1.6902e+07	0			0.4	1111.51	2639.39	2.02824e+08	183.246	2.5		0	2022-07-24	0.60604		1	7.72003e-05	9.46382e-05	0.000328337	0.000328337	0.6	1	0.39396	0.97144	349900	0.0243025	2.5	0.984771	1.00001	0.9849	0.000328337	0.000254638	0.000327444	00:00:00	507315	00:00:00			3.34671e+08	2022-07-24
2022-07-25	1.69022e+07	0			0.4	1106.69	2627.93	2.02826e+08	182.454	2.5		0	2022-07-25	0.606037		1	7.68e-05	9.42257e-05	0.000327798	0.000327798	0.6	1	0.393963	0.97144	350200	0.0243025	2.5	0.984771	1.00001	0.984908	0.000327798	0.000254055	0.000326903	00:00:00	507319	00:00:00			3.34676e+08	2022-07-25
2022-07-26	1.69024e+07	0			0.4	1101.9	2616.52	2.02828e+08	181.665	2.5		0	2022-07-26	0.606033		1	7.64021e-05	9.38153e-05	0.00032726	0.00032726	0.6	1	0.393967	0.97144	350500	0.0243025	2.5	0.984771	1.00001	0.984917	0.00032726	0.000253473	0.000326364	00:00:00	507324	00:00:00			3.34682e+08	2022-07-26
2022-07-27	1.69025e+07	0			0.4	1097.13	2605.18	2.0283e+08	180.88	2.5		0	2022-07-27	0.60603		1	7.60064e-05	9.34069e-05	0.000326723	0.000326723	0.6	1	0.39397	0.97144	350800	0.0243025	2.5	0.984771	1.00001	0.984926	0.000326723	0.000252893	0.000325825	00:00:00	507328	00:00:00			3.34687e+08	2022-07-27
2022-07-28	1.69027e+07	0			0.4	1092.39	2593.88	2.02833e+08	180.099	2.5		0	2022-07-28	0.606026		1	7.5613e-05	9.30005e-05	0.000326187	0.000326187	0.6	1	0.393974	0.97144	351100	0.0243025	2.5	0.984771	1.00001	0.984934	0.000326187	0.000252314	0.000325288	00:00:00	507333	00:00:00			3.34693e+08	2022-07-28
2022-07-29	1.69029e+07	0			0.4	1087.67	2582.65	2.02835e+08	179.322	2.5		0	2022-07-29	0.606023		1	7.5222e-05	9.25961e-05	0.000325652	0.000325652	0.6	1	0.393977	0.97144	351400	0.0243025	2.5	0.984771	1.00001	0.984943	0.000325652	0.000251736	0.000324751	00:00:00	507338	00:00:00			3.34698e+08	2022-07-29
2022-07-30	1.69031e+07	0			0.4	1082.97	2571.47	2.02837e+08	178.548	2.5		0	2022-07-30	0.606019		1	7.48331e-05	9.21937e-05	0.000325118	0.000325118	0.6	1	0.393981	0.97144	351700	0.0243025	2.5	0.984771	1.00001	0.984952	0.000325118	0.00025116	0.000324215	00:00:00	507342	00:00:00			3.34704e+08	2022-07-30
2022-07-31	1.69033e+07	0			0.4	1078.29	2560.34	2.02839e+08	177.779	2.5		0	2022-07-31	0.606016		1	7.44466e-05	9.17933e-05	0.000324585	0.000324585	0.6	1	0.393984	0.97144	352000	0.0243025	2.5	0.984771	1.00001	0.984961	0.000324585	0.000250585	0.000323681	00:00:00	507347	00:00:00			3.34709e+08	2022-07-31
2022-08-01	1.69034e+07	0			0.4	1073.64	2549.27	2.02841e+08	177.013	2.5		0	2022-08-01	0.606012		1	7.40623e-05	9.13948e-05	0.000324053	0.000324053	0.6	1	0.393988	0.97144	352300	0.0243025	2.5	0.984771	1.00001	0.98497	0.000324053	0.000250012	0.000323147	00:00:00	507351	00:00:00			3.34715e+08	2022-08-01
2022-08-02	1.69036e+07	0			0.4	1069.01	2538.25	2.02843e+08	176.251	2.5		0	2022-08-02	0.606008		1	7.36802e-05	9.09983e-05	0.000323522	0.000323522	0.6	1	0.393992	0.97144	352600	0.0243025	2.5	0.984771	1.00001	0.984979	0.000323522	0.00024944	0.000322614	00:00:00	507356	00:00:00			3.3472e+08	2022-08-02
2022-08-03	1.69038e+07	0			0.4	1064.4	2527.28	2.02845e+08	175.492	2.5		0	2022-08-03	0.606005		1	7.33003e-05	9.06037e-05	0.000322991	0.000322991	0.6	1	0.393995	0.97144	352900	0.0243025	2.5	0.984771	1.00001	0.984988	0.000322991	0.000248869	0.000322082	00:00:00	507360	00:00:00			3.34726e+08	2022-08-03
2022-08-04	1.6904e+07	0			0.4	1059.82	2516.37	2.02847e+08	174.738	2.5		0	2022-08-04	0.606001		1	7.29226e-05	9.02111e-05	0.000322462	0.000322462	0.6	1	0.393999	0.97144	353200	0.0243025	2.5	0.984771	1.00001	0.984998	0.000322462	0.0002483	0.000321552	00:00:00	507365	00:00:00			3.34731e+08	2022-08-04
2022-08-05	1.69041e+07	0			0.4	1055.26	2505.52	2.0285e+08	173.987	2.5		0	2022-08-05	0.605997		1	7.25471e-05	8.98204e-05	0.000321934	0.000321934	0.6	1	0.394003	0.97144	353500	0.0243025	2.5	0.984771	1.00001	0.985007	0.000321934	0.000247732	0.000321022	00:00:00	507369	00:00:00			3.34737e+08	2022-08-05
2022-08-06	1.69043e+07	0			0.4	1050.72	2494.71	2.02852e+08	173.239	2.5		0	2022-08-06	0.605993		1	7.21738e-05	8.94316e-05	0.000321406	0.000321406	0.6	1	0.394007	0.97144	353800	0.0243025	2.5	0.984771	1.00001	0.985016	0.000321406	0.000247165	0.000320493	00:00:00	507373	00:00:00			3.34742e+08	2022-08-06
2022-08-07	1.69045e+07	0			0.4	1046.2	2483.96	2.02854e+08	172.496	2.5		0	2022-08-07	0.60599		1	7.18027e-05	8.90447e-05	0.00032088	0.00032088	0.6	1	0.39401	0.97144	354100	0.0243025	2.5	0.984771	1.00001	0.985026	0.00032088	0.0002466	0.000319965	00:00:00	507378	00:00:00			3.34748e+08	2022-08-07
2022-08-08	1.69046e+07	0			0.4	1041.71	2473.26	2.02856e+08	171.756	2.5		0	2022-08-08	0.605986		1	7.14337e-05	8.86598e-05	0.000320355	0.000320355	0.6	1	0.394014	0.97144	354400	0.0243025	2.5	0.984771	1.00001	0.985035	0.000320355	0.000246037	0.000319438	00:00:00	507382	00:00:00			3.34753e+08	2022-08-08
2022-08-09	1.69048e+07	0			0.4	1037.24	2462.62	2.02858e+08	171.02	2.5		0	2022-08-09	0.605982		1	7.10668e-05	8.82767e-05	0.00031983	0.00031983	0.6	1	0.394018	0.97144	354700	0.0243025	2.5	0.984771	1.00001	0.985045	0.00031983	0.000245474	0.000318912	00:00:00	507387	00:00:00			3.34759e+08	2022-08-09
2022-08-10	1.6905e+07	0			0.4	1032.79	2452.03	2.0286e+08	170.287	2.5		0	2022-08-10	0.605978		1	7.07021e-05	8.78956e-05	0.000319306	0.000319306	0.6	1	0.394022	0.97144	355000	0.0243025	2.5	0.984771	1.00001	0.985055	0.000319306	0.000244913	0.000318387	00:00:00	507391	00:00:00			3.34764e+08	2022-08-10
2022-08-11	1.69052e+07	0			0.4	1028.36	2441.48	2.02862e+08	169.558	2.5		0	2022-08-11	0.605974		1	7.03395e-05	8.75163e-05	0.000318784	0.000318784	0.6	1	0.394026	0.97144	355300	0.0243025	2.5	0.984771	1.00001	0.985064	0.000318784	0.000244353	0.000317863	00:00:00	507395	00:00:00			3.3477e+08	2022-08-11
2022-08-12	1.69053e+07	0			0.4	1023.95	2431	2.02864e+08	168.833	2.5		0	2022-08-12	0.60597		1	6.9979e-05	8.71389e-05	0.000318262	0.000318262	0.6	1	0.39403	0.97144	355600	0.0243025	2.5	0.984771	1.00001	0.985074	0.000318262	0.000243795	0.00031734	00:00:00	507400	00:00:00			3.34775e+08	2022-08-12
2022-08-13	1.69055e+07	0			0.4	1019.57	2420.56	2.02866e+08	168.111	2.5		0	2022-08-13	0.605966		1	6.96206e-05	8.67633e-05	0.000317741	0.000317741	0.6	1	0.394034	0.97144	355900	0.0243025	2.5	0.984771	1.00001	0.985084	0.000317741	0.000243238	0.000316818	00:00:00	507404	00:00:00			3.34781e+08	2022-08-13
2022-08-14	1.69057e+07	0			0.4	1015.2	2410.17	2.02868e+08	167.393	2.5		0	2022-08-14	0.605962		1	6.92643e-05	8.63897e-05	0.000317222	0.000317222	0.6	1	0.394038	0.97144	356200	0.0243025	2.5	0.984771	1.00001	0.985094	0.000317222	0.000242682	0.000316296	00:00:00	507408	00:00:00			3.34786e+08	2022-08-14
2022-08-15	1.69058e+07	0			0.4	1010.86	2399.84	2.0287e+08	166.678	2.5		0	2022-08-15	0.605959		1	6.89101e-05	8.60178e-05	0.000316703	0.000316703	0.6	1	0.394041	0.97144	356500	0.0243025	2.5	0.984771	1.00001	0.985104	0.000316703	0.000242128	0.000315776	00:00:00	507412	00:00:00			3.34792e+08	2022-08-15
2022-08-16	1.6906e+07	0			0.4	1006.54	2389.56	2.02872e+08	165.967	2.5		0	2022-08-16	0.605954		1	6.85579e-05	8.56478e-05	0.000316185	0.000316185	0.6	1	0.394046	0.97144	356800	0.0243025	2.5	0.984771	1.00001	0.985114	0.000316185	0.000241575	0.000315257	00:00:00	507417	00:00:00			3.34797e+08	2022-08-16
2022-08-17	1.69062e+07	0			0.4	1002.24	2379.32	2.02874e+08	165.259	2.5		0	2022-08-17	0.60595		1	6.82077e-05	8.52797e-05	0.000315668	0.000315668	0.6	1	0.39405	0.97144	357100	0.0243025	2.5	0.984771	1.00001	0.985124	0.000315668	0.000241023	0.000314738	00:00:00	507421	00:00:00			3.34803e+08	2022-08-17
2022-08-18	1.69063e+07	0			0.4	997.964	2369.14	2.02876e+08	164.555	2.5		0	2022-08-18	0.605946		1	6.78596e-05	8.49133e-05	0.000315152	0.000315152	0.6	1	0.394054	0.97144	357400	0.0243025	2.5	0.984771	1.00001	0.985134	0.000315152	0.000240473	0.000314221	00:00:00	507425	00:00:00			3.34808e+08	2022-08-18
2022-08-19	1.69065e+07	0			0.4	993.708	2359.01	2.02878e+08	163.855	2.5		0	2022-08-19	0.605942		1	6.75135e-05	8.45488e-05	0.000314637	0.000314637	0.6	1	0.394058	0.97144	357700	0.0243025	2.5	0.984771	1.00001	0.985144	0.000314637	0.000239924	0.000313704	00:00:00	507429	00:00:00			3.34814e+08	2022-08-19
2022-08-20	1.69067e+07	0			0.4	989.472	2348.93	2.0288e+08	163.158	2.5		0	2022-08-20	0.605938		1	6.71694e-05	8.41861e-05	0.000314123	0.000314123	0.6	1	0.394062	0.97144	358000	0.0243025	2.5	0.984771	1.00001	0.985155	0.000314123	0.000239377	0.000313189	00:00:00	507433	00:00:00			3.34819e+08	2022-08-20
2022-08-21	1.69068e+07	0			0.4	985.258	2338.89	2.02882e+08	162.464	2.5		0	2022-08-21	0.605934		1	6.68273e-05	8.38251e-05	0.000313609	0.000313609	0.6	1	0.394066	0.97144	358300	0.0243025	2.5	0.984771	1.00001	0.985165	0.000313609	0.00023883	0.000312674	00:00:00	507438	00:00:00			3.34825e+08	2022-08-21
2022-08-22	1.6907e+07	0			0.4	981.065	2328.91	2.02884e+08	161.774	2.5		0	2022-08-22	0.60593		1	6.64872e-05	8.3466e-05	0.000313097	0.000313097	0.6	1	0.39407	0.97144	358600	0.0243025	2.5	0.984771	1.00001	0.985175	0.000313097	0.000238285	0.00031216	00:00:00	507442	00:00:00			3.3483e+08	2022-08-22
2022-08-23	1.69071e+07	0			0.4	976.892	2318.98	2.02886e+08	161.087	2.5		0	2022-08-23	0.605926		1	6.61491e-05	8.31086e-05	0.000312586	0.000312586	0.6	1	0.394074	0.97144	358900	0.0243025	2.5	0.984771	1.00001	0.985186	0.000312586	0.000237741	0.000311647	00:00:00	507446	00:00:00			3.34836e+08	2022-08-23
2022-08-24	1.69073e+07	0			0.4	972.74	2309.1	2.02888e+08	160.403	2.5		0	2022-08-24	0.605921		1	6.58129e-05	8.2753e-05	0.000312075	0.000312075	0.6	1	0.394079	0.97144	359200	0.0243025	2.5	0.984771	1.00001	0.985196	0.000312075	0.000237199	0.000311135	00:00:00	507450	00:00:00			3.34841e+08	2022-08-24
2022-08-25	1.69075e+07	0			0.4	968.608	2299.26	2.0289e+08	159.723	2.5		0	2022-08-25	0.605917		1	6.54787e-05	8.23992e-05	0.000311565	0.000311565	0.6	1	0.394083	0.97144	359500	0.0243025	2.5	0.984771	1.00001	0.985207	0.000311565	0.000236658	0.000310624	00:00:00	507454	00:00:00			3.34847e+08	2022-08-25
2022-08-26	1.69076e+07	0			0.4	964.498	2289.47	2.02891e+08	159.047	2.5		0	2022-08-26	0.605913		1	6.51465e-05	8.20472e-05	0.000311057	0.000311057	0.6	1	0.394087	0.97144	359800	0.0243025	2.5	0.984771	1.00001	0.985217	0.000311057	0.000236118	0.000310114	00:00:00	507458	00:00:00			3.34852e+08	2022-08-26
2022-08-27	1.69078e+07	0			0.4	960.407	2279.74	2.02893e+08	158.373	2.5		0	2022-08-27	0.605909		1	6.48161e-05	8.16968e-05	0.000310549	0.000310549	0.6	1	0.394091	0.97144	360100	0.0243025	2.5	0.984771	1.00001	0.985228	0.000310549	0.00023558	0.000309605	00:00:00	507462	00:00:00			3.34858e+08	2022-08-27
2022-08-28	1.69079e+07	0			0.4	956.337	2270.05	2.02895e+08	157.703	2.5		0	2022-08-28	0.605904		1	6.44877e-05	8.13483e-05	0.000310042	0.000310042	0.6	1	0.394096	0.97144	360400	0.0243025	2.5	0.984771	1.00001	0.985239	0.000310042	0.000235042	0.000309097	00:00:00	507466	00:00:00			3.34863e+08	2022-08-28
2022-08-29	1.69081e+07	0			0.4	952.287	2260.41	2.02897e+08	157.037	2.5		0	2022-08-29	0.6059		1	6.41612e-05	8.10014e-05	0.000309536	0.000309536	0.6	1	0.3941	0.97144	360700	0.0243025	2.5	0.984771	1.00001	0.98525	0.000309536	0.000234506	0.00030859	00:00:00	507470	00:00:00			3.34869e+08	2022-08-29
2022-08-30	1.69082e+07	0			0.4	948.257	2250.81	2.02899e+08	156.373	2.5		0	2022-08-30	0.605896		1	6.38366e-05	8.06563e-05	0.000309031	0.000309031	0.6	1	0.394104	0.97144	361000	0.0243025	2.5	0.984771	1.00001	0.985261	0.000309031	0.000233972	0.000308083	00:00:00	507474	00:00:00			3.34874e+08	2022-08-30
2022-08-31	1.69084e+07	0			0.4	944.247	2241.27	2.02901e+08	155.713	2.5		0	2022-08-31	0.605891		1	6.35138e-05	8.03129e-05	0.000308527	0.000308527	0.6	1	0.394109	0.97144	361300	0.0243025	2.5	0.984771	1.00001	0.985272	0.000308527	0.000233438	0.000307578	00:00:00	507478	00:00:00			3.3488e+08	2022-08-31
2022-09-01	1.69086e+07	0			0.4	940.257	2231.77	2.02903e+08	155.057	2.5		0	2022-09-01	0.605887		1	6.3193e-05	7.99712e-05	0.000308024	0.000308024	0.6	1	0.394113	0.97144	361600	0.0243025	2.5	0.984771	1.00001	0.985283	0.000308024	0.000232906	0.000307073	00:00:00	507482	00:00:00			3.34885e+08	2022-09-01
2022-09-02	1.69087e+07	0			0.4	936.286	2222.31	2.02905e+08	154.403	2.5		0	2022-09-02	0.605883		1	6.2874e-05	7.96312e-05	0.000307522	0.000307522	0.6	1	0.394117	0.97144	361900	0.0243025	2.5	0.984771	1.00001	0.985294	0.000307522	0.000232375	0.00030657	00:00:00	507486	00:00:00			3.34891e+08	2022-09-02
2022-09-03	1.69089e+07	0			0.4	932.336	2212.91	2.02906e+08	153.753	2.5		0	2022-09-03	0.605878		1	6.25569e-05	7.92929e-05	0.00030702	0.00030702	0.6	1	0.394122	0.97144	362200	0.0243025	2.5	0.984771	1.00001	0.985305	0.00030702	0.000231846	0.000306067	00:00:00	507490	00:00:00			3.34896e+08	2022-09-03
2022-09-04	1.6909e+07	0			0.4	928.405	2203.55	2.02908e+08	153.106	2.5		0	2022-09-04	0.605874		1	6.22415e-05	7.89563e-05	0.00030652	0.00030652	0.6	1	0.394126	0.97144	362500	0.0243025	2.5	0.984771	1.00001	0.985316	0.00030652	0.000231318	0.000305565	00:00:00	507494	00:00:00			3.34902e+08	2022-09-04
2022-09-05	1.69092e+07	0			0.4	924.494	2194.24	2.0291e+08	152.462	2.5		0	2022-09-05	0.605869		1	6.19281e-05	7.86214e-05	0.00030602	0.00030602	0.6	1	0.394131	0.97144	362800	0.0243025	2.5	0.984771	1.00001	0.985327	0.00030602	0.000230791	0.000305064	00:00:00	507498	00:00:00			3.34907e+08	2022-09-05
2022-09-06	1.69093e+07	0			0.4	920.602	2184.98	2.02912e+08	151.821	2.5		0	2022-09-06	0.605865		1	6.16164e-05	7.82881e-05	0.000305521	0.000305521	0.6	1	0.394135	0.97144	363100	0.0243025	2.5	0.984771	1.00001	0.985339	0.000305521	0.000230265	0.000304564	00:00:00	507502	00:00:00			3.34913e+08	2022-09-06
2022-09-07	1.69095e+07	0			0.4	916.729	2175.76	2.02914e+08	151.184	2.5		0	2022-09-07	0.60586		1	6.13066e-05	7.79565e-05	0.000305024	0.000305024	0.6	1	0.39414	0.97144	363400	0.0243025	2.5	0.984771	1.00001	0.98535	0.000305024	0.00022974	0.000304065	00:00:00	507505	00:00:00			3.34918e+08	2022-09-07
2022-09-08	1.69096e+07	0			0.4	912.876	2166.58	2.02916e+08	150.55	2.5		0	2022-09-08	0.605855		1	6.09985e-05	7.76265e-05	0.000304527	0.000304527	0.6	1	0.394145	0.97144	363700	0.0243025	2.5	0.984771	1.00001	0.985361	0.000304527	0.000229217	0.000303567	00:00:00	507509	00:00:00			3.34924e+08	2022-09-08
2022-09-09	1.69098e+07	0			0.4	909.042	2157.45	2.02917e+08	149.919	2.5		0	2022-09-09	0.605851		1	6.06923e-05	7.72982e-05	0.000304031	0.000304031	0.6	1	0.394149	0.97144	364000	0.0243025	2.5	0.984771	1.00001	0.985373	0.000304031	0.000228695	0.00030307	00:00:00	507513	00:00:00			3.34929e+08	2022-09-09
2022-09-10	1.69099e+07	0			0.4	905.227	2148.37	2.02919e+08	149.291	2.5		0	2022-09-10	0.605846		1	6.03878e-05	7.69716e-05	0.000303536	0.000303536	0.6	1	0.394154	0.97144	364300	0.0243025	2.5	0.984771	1.00001	0.985384	0.000303536	0.000228175	0.000302573	00:00:00	507517	00:00:00			3.34935e+08	2022-09-10
2022-09-11	1.69101e+07	0			0.4	901.431	2139.34	2.02921e+08	148.666	2.5		0	2022-09-11	0.605842		1	6.00851e-05	7.66465e-05	0.000303041	0.000303041	0.6	1	0.394158	0.97144	364600	0.0243025	2.5	0.984771	1.00001	0.985396	0.000303041	0.000227655	0.000302078	00:00:00	507521	00:00:00			3.3494e+08	2022-09-11
2022-09-12	1.69102e+07	0			0.4	897.654	2130.34	2.02923e+08	148.044	2.5		0	2022-09-12	0.605837		1	5.97842e-05	7.63231e-05	0.000302548	0.000302548	0.6	1	0.394163	0.97144	364900	0.0243025	2.5	0.984771	1.00001	0.985408	0.000302548	0.000227137	0.000301583	00:00:00	507524	00:00:00			3.34946e+08	2022-09-12
2022-09-13	1.69104e+07	0			0.4	893.896	2121.4	2.02924e+08	147.426	2.5		0	2022-09-13	0.605832		1	5.9485e-05	7.60013e-05	0.000302055	0.000302055	0.6	1	0.394168	0.97144	365200	0.0243025	2.5	0.984771	1.00001	0.985419	0.000302055	0.00022662	0.000301089	00:00:00	507528	00:00:00			3.34951e+08	2022-09-13
2022-09-14	1.69105e+07	0			0.4	890.157	2112.49	2.02926e+08	146.81	2.5		0	2022-09-14	0.605828		1	5.91875e-05	7.56811e-05	0.000301564	0.000301564	0.6	1	0.394172	0.97144	365500	0.0243025	2.5	0.984771	1.00001	0.985431	0.000301564	0.000226104	0.000300597	00:00:00	507532	00:00:00			3.34957e+08	2022-09-14
2022-09-15	1.69107e+07	0			0.4	886.436	2103.63	2.02928e+08	146.198	2.5		0	2022-09-15	0.605823		1	5.88918e-05	7.53625e-05	0.000301073	0.000301073	0.6	1	0.394177	0.97144	365800	0.0243025	2.5	0.984771	1.00001	0.985443	0.000301073	0.00022559	0.000300105	00:00:00	507536	00:00:00			3.34962e+08	2022-09-15
2022-09-16	1.69108e+07	0			0.4	882.733	2094.82	2.0293e+08	145.589	2.5		0	2022-09-16	0.605818		1	5.85977e-05	7.50455e-05	0.000300583	0.000300583	0.6	1	0.394182	0.97144	366100	0.0243025	2.5	0.984771	1.00001	0.985455	0.000300583	0.000225076	0.000299613	00:00:00	507539	00:00:00			3.34968e+08	2022-09-16
2022-09-17	1.6911e+07	0			0.4	879.05	2086.05	2.02931e+08	144.982	2.5		0	2022-09-17	0.605813		1	5.83054e-05	7.473e-05	0.000300094	0.000300094	0.6	1	0.394187	0.97144	366400	0.0243025	2.5	0.984771	1.00001	0.985467	0.000300094	0.000224564	0.000299123	00:00:00	507543	00:00:00			3.34974e+08	2022-09-17
2022-09-18	1.69111e+07	0			0.4	875.384	2077.32	2.02933e+08	144.379	2.5		0	2022-09-18	0.605809		1	5.80148e-05	7.44162e-05	0.000299606	0.000299606	0.6	1	0.394191	0.97144	366700	0.0243025	2.5	0.984771	1.00001	0.985479	0.000299606	0.000224053	0.000298634	00:00:00	507547	00:00:00			3.34979e+08	2022-09-18
2022-09-19	1.69112e+07	0			0.4	871.737	2068.64	2.02935e+08	143.779	2.5		0	2022-09-19	0.605804		1	5.77259e-05	7.41039e-05	0.000299119	0.000299119	0.6	1	0.394196	0.97144	367000	0.0243025	2.5	0.984771	1.00001	0.985491	0.000299119	0.000223544	0.000298145	00:00:00	507550	00:00:00			3.34985e+08	2022-09-19
2022-09-20	1.69114e+07	0			0.4	868.108	2060	2.02937e+08	143.181	2.5		0	2022-09-20	0.605799		1	5.74386e-05	7.37932e-05	0.000298632	0.000298632	0.6	1	0.394201	0.97144	367300	0.0243025	2.5	0.984771	1.00001	0.985503	0.000298632	0.000223035	0.000297658	00:00:00	507554	00:00:00			3.3499e+08	2022-09-20
2022-09-21	1.69115e+07	0			0.4	864.497	2051.4	2.02938e+08	142.587	2.5		0	2022-09-21	0.605794		1	5.7153e-05	7.3484e-05	0.000298147	0.000298147	0.6	1	0.394206	0.97144	367600	0.0243025	2.5	0.984771	1.00001	0.985515	0.000298147	0.000222528	0.000297171	00:00:00	507558	00:00:00			3.34996e+08	2022-09-21
2022-09-22	1.69117e+07	0			0.4	860.904	2042.85	2.0294e+08	141.996	2.5		0	2022-09-22	0.605789		1	5.68691e-05	7.31764e-05	0.000297662	0.000297662	0.6	1	0.394211	0.97144	367900	0.0243025	2.5	0.984771	1.00001	0.985527	0.000297662	0.000222022	0.000296685	00:00:00	507561	00:00:00			3.35001e+08	2022-09-22
2022-09-23	1.69118e+07	0			0.4	857.33	2034.34	2.02942e+08	141.407	2.5		0	2022-09-23	0.605784		1	5.65868e-05	7.28703e-05	0.000297179	0.000297179	0.6	1	0.394216	0.97144	368200	0.0243025	2.5	0.984771	1.00001	0.985539	0.000297179	0.000221518	0.0002962	00:00:00	507565	00:00:00			3.35007e+08	2022-09-23
2022-09-24	1.6912e+07	0			0.4	853.772	2025.87	2.02943e+08	140.822	2.5		0	2022-09-24	0.605779		1	5.63061e-05	7.25658e-05	0.000296696	0.000296696	0.6	1	0.394221	0.97144	368500	0.0243025	2.5	0.984771	1.00001	0.985551	0.000296696	0.000221014	0.000295716	00:00:00	507569	00:00:00			3.35012e+08	2022-09-24
2022-09-25	1.69121e+07	0			0.4	850.233	2017.44	2.02945e+08	140.239	2.5		0	2022-09-25	0.605774		1	5.60271e-05	7.22627e-05	0.000296214	0.000296214	0.6	1	0.394226	0.97144	368800	0.0243025	2.5	0.984771	1.00001	0.985564	0.000296214	0.000220512	0.000295233	00:00:00	507572	00:00:00			3.35018e+08	2022-09-25
2022-09-26	1.69122e+07	0			0.4	846.712	2009.06	2.02947e+08	139.66	2.5		0	2022-09-26	0.60577		1	5.57497e-05	7.19612e-05	0.000295732	0.000295732	0.6	1	0.39423	0.97144	369100	0.0243025	2.5	0.984771	1.00001	0.985576	0.000295732	0.000220011	0.000294751	00:00:00	507576	00:00:00			3.35023e+08	2022-09-26
2022-09-27	1.69124e+07	0			0.4	843.208	2000.71	2.02948e+08	139.083	2.5		0	2022-09-27	0.605765		1	5.54739e-05	7.16612e-05	0.000295252	0.000295252	0.6	1	0.394235	0.97144	369400	0.0243025	2.5	0.984771	1.00001	0.985589	0.000295252	0.000219511	0.000294269	00:00:00	507579	00:00:00			3.35029e+08	2022-09-27
2022-09-28	1.69125e+07	0			0.4	839.721	1992.41	2.0295e+08	138.509	2.5		0	2022-09-28	0.60576		1	5.51997e-05	7.13627e-05	0.000294773	0.000294773	0.6	1	0.39424	0.97144	369700	0.0243025	2.5	0.984771	1.00001	0.985601	0.000294773	0.000219012	0.000293789	00:00:00	507583	00:00:00			3.35034e+08	2022-09-28
2022-09-29	1.69126e+07	0			0.4	836.252	1984.15	2.02952e+08	137.938	2.5		0	2022-09-29	0.605755		1	5.49271e-05	7.10657e-05	0.000294294	0.000294294	0.6	1	0.394245	0.97144	370000	0.0243025	2.5	0.984771	1.00001	0.985614	0.000294294	0.000218514	0.000293309	00:00:00	507586	00:00:00			3.3504e+08	2022-09-29
2022-09-30	1.69128e+07	0			0.4	832.8	1975.93	2.02953e+08	137.37	2.5		0	2022-09-30	0.60575		1	5.4656e-05	7.07702e-05	0.000293816	0.000293816	0.6	1	0.39425	0.97144	370300	0.0243025	2.5	0.984771	1.00001	0.985626	0.000293816	0.000218018	0.00029283	00:00:00	507590	00:00:00			3.35045e+08	2022-09-30
2022-10-01	1.69129e+07	0			0.4	829.366	1967.76	2.02955e+08	136.805	2.5		0	2022-10-01	0.605744		1	5.43866e-05	7.04762e-05	0.000293339	0.000293339	0.6	1	0.394256	0.97144	370600	0.0243025	2.5	0.984771	1.00001	0.985639	0.000293339	0.000217523	0.000292352	00:00:00	507593	00:00:00			3.35051e+08	2022-10-01
2022-10-02	1.69131e+07	0			0.4	825.949	1959.62	2.02957e+08	136.243	2.5		0	2022-10-02	0.605739		1	5.41187e-05	7.01836e-05	0.000292863	0.000292863	0.6	1	0.394261	0.97144	370900	0.0243025	2.5	0.984771	1.00001	0.985652	0.000292863	0.000217029	0.000291875	00:00:00	507597	00:00:00			3.35056e+08	2022-10-02
2022-10-03	1.69132e+07	0			0.4	822.548	1951.52	2.02958e+08	135.683	2.5		0	2022-10-03	0.605734		1	5.38523e-05	6.98925e-05	0.000292388	0.000292388	0.6	1	0.394266	0.97144	371200	0.0243025	2.5	0.984771	1.00001	0.985664	0.000292388	0.000216536	0.000291398	00:00:00	507600	00:00:00			3.35062e+08	2022-10-03
2022-10-04	1.69133e+07	0			0.4	819.165	1943.47	2.0296e+08	135.126	2.5		0	2022-10-04	0.605729		1	5.35875e-05	6.96029e-05	0.000291914	0.000291914	0.6	1	0.394271	0.97144	371500	0.0243025	2.5	0.984771	1.00001	0.985677	0.000291914	0.000216044	0.000290923	00:00:00	507604	00:00:00			3.35067e+08	2022-10-04
2022-10-05	1.69135e+07	0			0.4	815.799	1935.45	2.02962e+08	134.572	2.5		0	2022-10-05	0.605724		1	5.33242e-05	6.93147e-05	0.00029144	0.00029144	0.6	1	0.394276	0.97144	371800	0.0243025	2.5	0.984771	1.00001	0.98569	0.00029144	0.000215554	0.000290448	00:00:00	507607	00:00:00			3.35073e+08	2022-10-05
2022-10-06	1.69136e+07	0			0.4	812.449	1927.48	2.02963e+08	134.021	2.5		0	2022-10-06	0.605719		1	5.30625e-05	6.90279e-05	0.000290967	0.000290967	0.6	1	0.394281	0.97144	372100	0.0243025	2.5	0.984771	1.00001	0.985703	0.000290967	0.000215064	0.000289974	00:00:00	507611	00:00:00			3.35078e+08	2022-10-06
2022-10-07	1.69137e+07	0			0.4	809.117	1919.54	2.02965e+08	133.472	2.5		0	2022-10-07	0.605714		1	5.28022e-05	6.87426e-05	0.000290495	0.000290495	0.6	1	0.394286	0.97144	372400	0.0243025	2.5	0.984771	1.00001	0.985716	0.000290495	0.000214576	0.000289501	00:00:00	507614	00:00:00			3.35084e+08	2022-10-07
2022-10-08	1.69139e+07	0			0.4	805.801	1911.65	2.02966e+08	132.927	2.5		0	2022-10-08	0.605708		1	5.25435e-05	6.84587e-05	0.000290024	0.000290024	0.6	1	0.394292	0.97144	372700	0.0243025	2.5	0.984771	1.00001	0.985729	0.000290024	0.000214089	0.000289029	00:00:00	507617	00:00:00			3.35089e+08	2022-10-08
2022-10-09	1.6914e+07	0			0.4	802.501	1903.79	2.02968e+08	132.383	2.5		0	2022-10-09	0.605703		1	5.22863e-05	6.81763e-05	0.000289554	0.000289554	0.6	1	0.394297	0.97144	373000	0.0243025	2.5	0.984771	1.00001	0.985742	0.000289554	0.000213603	0.000288558	00:00:00	507621	00:00:00			3.35095e+08	2022-10-09
2022-10-10	1.69141e+07	0			0.4	799.218	1895.98	2.0297e+08	131.843	2.5		0	2022-10-10	0.605698		1	5.20305e-05	6.78952e-05	0.000289085	0.000289085	0.6	1	0.394302	0.97144	373300	0.0243025	2.5	0.984771	1.00001	0.985755	0.000289085	0.000213119	0.000288087	00:00:00	507624	00:00:00			3.351e+08	2022-10-10
2022-10-11	1.69143e+07	0			0.4	795.952	1888.2	2.02971e+08	131.306	2.5		0	2022-10-11	0.605693		1	5.17763e-05	6.76156e-05	0.000288616	0.000288616	0.6	1	0.394307	0.97144	373600	0.0243025	2.5	0.984771	1.00001	0.985768	0.000288616	0.000212635	0.000287618	00:00:00	507627	00:00:00			3.35106e+08	2022-10-11
2022-10-12	1.69144e+07	0			0.4	792.702	1880.46	2.02973e+08	130.771	2.5		0	2022-10-12	0.605688		1	5.15235e-05	6.73374e-05	0.000288149	0.000288149	0.6	1	0.394312	0.97144	373900	0.0243025	2.5	0.984771	1.00001	0.985781	0.000288149	0.000212153	0.000287149	00:00:00	507631	00:00:00			3.35111e+08	2022-10-12
2022-10-13	1.69145e+07	0			0.4	789.468	1872.76	2.02974e+08	130.238	2.5		0	2022-10-13	0.605682		1	5.12721e-05	6.70606e-05	0.000287682	0.000287682	0.6	1	0.394318	0.97144	374200	0.0243025	2.5	0.984771	1.00001	0.985794	0.000287682	0.000211672	0.000286681	00:00:00	507634	00:00:00			3.35117e+08	2022-10-13
2022-10-14	1.69146e+07	0			0.4	786.25	1865.1	2.02976e+08	129.709	2.5		0	2022-10-14	0.605677		1	5.10223e-05	6.67851e-05	0.000287216	0.000287216	0.6	1	0.394323	0.97144	374500	0.0243025	2.5	0.984771	1.00001	0.985808	0.000287216	0.000211191	0.000286214	00:00:00	507637	00:00:00			3.35122e+08	2022-10-14
2022-10-15	1.69148e+07	0			0.4	783.048	1857.48	2.02977e+08	129.182	2.5		0	2022-10-15	0.605672		1	5.07738e-05	6.65111e-05	0.000286751	0.000286751	0.6	1	0.394328	0.97144	374800	0.0243025	2.5	0.984771	1.00001	0.985821	0.000286751	0.000210713	0.000285748	00:00:00	507641	00:00:00			3.35128e+08	2022-10-15
2022-10-16	1.69149e+07	0			0.4	779.863	1849.89	2.02979e+08	128.658	2.5		0	2022-10-16	0.605666		1	5.05268e-05	6.62384e-05	0.000286286	0.000286286	0.6	1	0.394334	0.97144	375100	0.0243025	2.5	0.984771	1.00001	0.985834	0.000286286	0.000210235	0.000285282	00:00:00	507644	00:00:00			3.35133e+08	2022-10-16
2022-10-17	1.6915e+07	0			0.4	776.693	1842.34	2.0298e+08	128.136	2.5		0	2022-10-17	0.605661		1	5.02813e-05	6.59671e-05	0.000285823	0.000285823	0.6	1	0.394339	0.97144	375400	0.0243025	2.5	0.984771	1.00001	0.985848	0.000285823	0.000209758	0.000284818	00:00:00	507647	00:00:00			3.35139e+08	2022-10-17
2022-10-18	1.69152e+07	0			0.4	773.54	1834.83	2.02982e+08	127.617	2.5		0	2022-10-18	0.605655		1	5.00371e-05	6.56971e-05	0.00028536	0.00028536	0.6	1	0.394345	0.97144	375700	0.0243025	2.5	0.984771	1.00001	0.985861	0.00028536	0.000209282	0.000284354	00:00:00	507651	00:00:00			3.35144e+08	2022-10-18
2022-10-19	1.69153e+07	0			0.4	770.402	1827.36	2.02983e+08	127.1	2.5		0	2022-10-19	0.60565		1	4.97944e-05	6.54285e-05	0.000284898	0.000284898	0.6	1	0.39435	0.97144	376000	0.0243025	2.5	0.984771	1.00001	0.985875	0.000284898	0.000208808	0.000283891	00:00:00	507654	00:00:00			3.3515e+08	2022-10-19
2022-10-20	1.69154e+07	0			0.4	767.279	1819.93	2.02985e+08	126.587	2.5		0	2022-10-20	0.605645		1	4.9553e-05	6.51613e-05	0.000284437	0.000284437	0.6	1	0.394355	0.97144	376300	0.0243025	2.5	0.984771	1.00001	0.985888	0.000284437	0.000208335	0.000283429	00:00:00	507657	00:00:00			3.35155e+08	2022-10-20
2022-10-21	1.69155e+07	0			0.4	764.173	1812.53	2.02987e+08	126.075	2.5		0	2022-10-21	0.605639		1	4.93131e-05	6.48953e-05	0.000283977	0.000283977	0.6	1	0.394361	0.97144	376600	0.0243025	2.5	0.984771	1.00001	0.985902	0.000283977	0.000207863	0.000282968	00:00:00	507660	00:00:00			3.35161e+08	2022-10-21
2022-10-22	1.69157e+07	0			0.4	761.082	1805.17	2.02988e+08	125.567	2.5		0	2022-10-22	0.605634		1	4.90745e-05	6.46308e-05	0.000283517	0.000283517	0.6	1	0.394366	0.97144	376900	0.0243025	2.5	0.984771	1.00001	0.985916	0.000283517	0.000207392	0.000282507	00:00:00	507663	00:00:00			3.35166e+08	2022-10-22
2022-10-23	1.69158e+07	0			0.4	758.006	1797.85	2.0299e+08	125.06	2.5		0	2022-10-23	0.605628		1	4.88373e-05	6.43675e-05	0.000283058	0.000283058	0.6	1	0.394372	0.97144	377200	0.0243025	2.5	0.984771	1.00001	0.985929	0.000283058	0.000206922	0.000282047	00:00:00	507667	00:00:00			3.35172e+08	2022-10-23
2022-10-24	1.69159e+07	0			0.4	754.946	1790.56	2.02991e+08	124.557	2.5		0	2022-10-24	0.605623		1	4.86015e-05	6.41056e-05	0.000282601	0.000282601	0.6	1	0.394377	0.97144	377500	0.0243025	2.5	0.984771	1.00001	0.985943	0.000282601	0.000206453	0.000281589	00:00:00	507670	00:00:00			3.35177e+08	2022-10-24
2022-10-25	1.6916e+07	0			0.4	751.901	1783.31	2.02992e+08	124.056	2.5		0	2022-10-25	0.605617		1	4.83671e-05	6.3845e-05	0.000282143	0.000282143	0.6	1	0.394383	0.97144	377800	0.0243025	2.5	0.984771	1.00001	0.985957	0.000282143	0.000205985	0.000281131	00:00:00	507673	00:00:00			3.35183e+08	2022-10-25
2022-10-26	1.69162e+07	0			0.4	748.872	1776.1	2.02994e+08	123.557	2.5		0	2022-10-26	0.605612		1	4.8134e-05	6.35857e-05	0.000281687	0.000281687	0.6	1	0.394388	0.97144	378100	0.0243025	2.5	0.984771	1.00001	0.985971	0.000281687	0.000205519	0.000280673	00:00:00	507676	00:00:00			3.35188e+08	2022-10-26
2022-10-27	1.69163e+07	0			0.4	745.857	1768.92	2.02995e+08	123.061	2.5		0	2022-10-27	0.605606		1	4.79022e-05	6.33277e-05	0.000281232	0.000281232	0.6	1	0.394394	0.97144	378400	0.0243025	2.5	0.984771	1.00001	0.985985	0.000281232	0.000205053	0.000280217	00:00:00	507679	00:00:00			3.35194e+08	2022-10-27
2022-10-28	1.69164e+07	0			0.4	742.858	1761.78	2.02997e+08	122.567	2.5		0	2022-10-28	0.605601		1	4.76718e-05	6.3071e-05	0.000280777	0.000280777	0.6	1	0.394399	0.97144	378700	0.0243025	2.5	0.984771	1.00001	0.985999	0.000280777	0.000204589	0.000279761	00:00:00	507682	00:00:00			3.35199e+08	2022-10-28
2022-10-29	1.69165e+07	0			0.4	739.874	1754.67	2.02998e+08	122.076	2.5		0	2022-10-29	0.605595		1	4.74427e-05	6.28156e-05	0.000280323	0.000280323	0.6	1	0.394405	0.97144	379000	0.0243025	2.5	0.984771	1.00001	0.986012	0.000280323	0.000204125	0.000279306	00:00:00	507686	00:00:00			3.35205e+08	2022-10-29
2022-10-30	1.69167e+07	0			0.4	736.905	1747.6	2.03e+08	121.587	2.5		0	2022-10-30	0.605589		1	4.72149e-05	6.25614e-05	0.00027987	0.00027987	0.6	1	0.394411	0.97144	379300	0.0243025	2.5	0.984771	1.00001	0.986026	0.00027987	0.000203663	0.000278852	00:00:00	507689	00:00:00			3.3521e+08	2022-10-30
2022-10-31	1.69168e+07	0			0.4	733.95	1740.57	2.03001e+08	121.101	2.5		0	2022-10-31	0.605584		1	4.69885e-05	6.23086e-05	0.000279418	0.000279418	0.6	1	0.394416	0.97144	379600	0.0243025	2.5	0.984771	1.00001	0.986041	0.000279418	0.000203202	0.000278399	00:00:00	507692	00:00:00			3.35216e+08	2022-10-31
2022-11-01	1.69169e+07	0			0.4	731.011	1733.57	2.03003e+08	120.617	2.5		0	2022-11-01	0.605578		1	4.67633e-05	6.2057e-05	0.000278967	0.000278967	0.6	1	0.394422	0.97144	379900	0.0243025	2.5	0.984771	1.00001	0.986055	0.000278967	0.000202742	0.000277947	00:00:00	507695	00:00:00			3.35221e+08	2022-11-01
2022-11-02	1.6917e+07	0			0.4	728.086	1726.61	2.03004e+08	120.136	2.5		0	2022-11-02	0.605573		1	4.65395e-05	6.18067e-05	0.000278516	0.000278516	0.6	1	0.394427	0.97144	380200	0.0243025	2.5	0.984771	1.00001	0.986069	0.000278516	0.000202283	0.000277495	00:00:00	507698	00:00:00			3.35227e+08	2022-11-02
2022-11-03	1.69171e+07	0			0.4	725.176	1719.68	2.03006e+08	119.657	2.5		0	2022-11-03	0.605567		1	4.63169e-05	6.15576e-05	0.000278066	0.000278066	0.6	1	0.394433	0.97144	380500	0.0243025	2.5	0.984771	1.00001	0.986083	0.000278066	0.000201825	0.000277045	00:00:00	507701	00:00:00			3.35232e+08	2022-11-03
2022-11-04	1.69173e+07	0			0.4	722.28	1712.78	2.03007e+08	119.181	2.5		0	2022-11-04	0.605561		1	4.60956e-05	6.13098e-05	0.000277617	0.000277617	0.6	1	0.394439	0.97144	380800	0.0243025	2.5	0.984771	1.00001	0.986097	0.000277617	0.000201369	0.000276595	00:00:00	507704	00:00:00			3.35238e+08	2022-11-04
2022-11-05	1.69174e+07	0			0.4	719.399	1705.92	2.03008e+08	118.706	2.5		0	2022-11-05	0.605555		1	4.58756e-05	6.10632e-05	0.000277169	0.000277169	0.6	1	0.394445	0.97144	381100	0.0243025	2.5	0.984771	1.00001	0.986111	0.000277169	0.000200913	0.000276145	00:00:00	507707	00:00:00			3.35243e+08	2022-11-05
2022-11-06	1.69175e+07	0			0.4	716.532	1699.09	2.0301e+08	118.235	2.5		0	2022-11-06	0.60555		1	4.56568e-05	6.08179e-05	0.000276721	0.000276721	0.6	1	0.39445	0.97144	381400	0.0243025	2.5	0.984771	1.00001	0.986126	0.000276721	0.000200459	0.000275697	00:00:00	507710	00:00:00			3.35249e+08	2022-11-06
2022-11-07	1.69176e+07	0			0.4	713.68	1692.3	2.03011e+08	117.765	2.5		0	2022-11-07	0.605544		1	4.54394e-05	6.05738e-05	0.000276275	0.000276275	0.6	1	0.394456	0.97144	381700	0.0243025	2.5	0.984771	1.00001	0.98614	0.000276275	0.000200005	0.000275249	00:00:00	507713	00:00:00			3.35254e+08	2022-11-07
2022-11-08	1.69177e+07	0			0.4	710.842	1685.55	2.03013e+08	117.298	2.5		0	2022-11-08	0.605538		1	4.52231e-05	6.03309e-05	0.000275829	0.000275829	0.6	1	0.394462	0.97144	382000	0.0243025	2.5	0.984771	1.00001	0.986154	0.000275829	0.000199553	0.000274803	00:00:00	507716	00:00:00			3.3526e+08	2022-11-08
2022-11-09	1.69178e+07	0			0.4	708.018	1678.82	2.03014e+08	116.833	2.5		0	2022-11-09	0.605532		1	4.50081e-05	6.00893e-05	0.000275384	0.000275384	0.6	1	0.394468	0.97144	382300	0.0243025	2.5	0.984771	1.00001	0.986169	0.000275384	0.000199101	0.000274357	00:00:00	507719	00:00:00			3.35265e+08	2022-11-09
2022-11-10	1.6918e+07	0			0.4	705.208	1672.13	2.03016e+08	116.371	2.5		0	2022-11-10	0.605527		1	4.47944e-05	5.98488e-05	0.000274939	0.000274939	0.6	1	0.394473	0.97144	382600	0.0243025	2.5	0.984771	1.00001	0.986183	0.000274939	0.000198651	0.000273911	00:00:00	507722	00:00:00			3.35271e+08	2022-11-10
2022-11-11	1.69181e+07	0			0.4	702.413	1665.48	2.03017e+08	115.911	2.5		0	2022-11-11	0.605521		1	4.45818e-05	5.96096e-05	0.000274496	0.000274496	0.6	1	0.394479	0.97144	382900	0.0243025	2.5	0.984771	1.00001	0.986198	0.000274496	0.000198202	0.000273467	00:00:00	507725	00:00:00			3.35276e+08	2022-11-11
2022-11-12	1.69182e+07	0			0.4	699.631	1658.85	2.03018e+08	115.453	2.5		0	2022-11-12	0.605515		1	4.43705e-05	5.93716e-05	0.000274053	0.000274053	0.6	1	0.394485	0.97144	383200	0.0243025	2.5	0.984771	1.00001	0.986212	0.000274053	0.000197754	0.000273023	00:00:00	507728	00:00:00			3.35282e+08	2022-11-12
2022-11-13	1.69183e+07	0			0.4	696.863	1652.26	2.0302e+08	114.997	2.5		0	2022-11-13	0.605509		1	4.41604e-05	5.91347e-05	0.000273611	0.000273611	0.6	1	0.394491	0.97144	383500	0.0243025	2.5	0.984771	1.00001	0.986227	0.000273611	0.000197306	0.00027258	00:00:00	507731	00:00:00			3.35288e+08	2022-11-13
2022-11-14	1.69184e+07	0			0.4	694.11	1645.7	2.03021e+08	114.544	2.5		0	2022-11-14	0.605503		1	4.39515e-05	5.88991e-05	0.00027317	0.00027317	0.6	1	0.394497	0.97144	383800	0.0243025	2.5	0.984771	1.00001	0.986242	0.00027317	0.00019686	0.000272138	00:00:00	507734	00:00:00			3.35293e+08	2022-11-14
2022-11-15	1.69185e+07	0			0.4	691.37	1639.18	2.03022e+08	114.093	2.5		0	2022-11-15	0.605497		1	4.37438e-05	5.86646e-05	0.000272729	0.000272729	0.6	1	0.394503	0.97144	384100	0.0243025	2.5	0.984771	1.00001	0.986256	0.000272729	0.000196415	0.000271697	00:00:00	507737	00:00:00			3.35299e+08	2022-11-15
2022-11-16	1.69186e+07	0			0.4	688.643	1632.69	2.03024e+08	113.645	2.5		0	2022-11-16	0.605492		1	4.35373e-05	5.84314e-05	0.00027229	0.00027229	0.6	1	0.394508	0.97144	384400	0.0243025	2.5	0.984771	1.00001	0.986271	0.00027229	0.000195972	0.000271256	00:00:00	507740	00:00:00			3.35304e+08	2022-11-16
2022-11-17	1.69188e+07	0			0.4	685.931	1626.23	2.03025e+08	113.198	2.5		0	2022-11-17	0.605486		1	4.3332e-05	5.81992e-05	0.000271851	0.000271851	0.6	1	0.394514	0.97144	384700	0.0243025	2.5	0.984771	1.00001	0.986286	0.000271851	0.000195529	0.000270817	00:00:00	507742	00:00:00			3.3531e+08	2022-11-17
2022-11-18	1.69189e+07	0			0.4	683.232	1619.8	2.03026e+08	112.754	2.5		0	2022-11-18	0.60548		1	4.31279e-05	5.79683e-05	0.000271413	0.000271413	0.6	1	0.39452	0.97144	385000	0.0243025	2.5	0.984771	1.00002	0.986301	0.000271413	0.000195087	0.000270378	00:00:00	507745	00:00:00			3.35315e+08	2022-11-18
2022-11-19	1.6919e+07	0			0.4	680.546	1613.41	2.03028e+08	112.312	2.5		0	2022-11-19	0.605474		1	4.29249e-05	5.77385e-05	0.000270975	0.000270975	0.6	1	0.394526	0.97144	385300	0.0243025	2.5	0.984771	1.00002	0.986315	0.000270975	0.000194646	0.000269939	00:00:00	507748	00:00:00			3.35321e+08	2022-11-19
2022-11-20	1.69191e+07	0			0.4	677.874	1607.05	2.03029e+08	111.872	2.5		0	2022-11-20	0.605468		1	4.27231e-05	5.75099e-05	0.000270539	0.000270539	0.6	1	0.394532	0.97144	385600	0.0243025	2.5	0.984771	1.00002	0.98633	0.000270539	0.000194206	0.000269502	00:00:00	507751	00:00:00			3.35326e+08	2022-11-20
2022-11-21	1.69192e+07	0			0.4	675.216	1600.72	2.03031e+08	111.435	2.5		0	2022-11-21	0.605462		1	4.25225e-05	5.72824e-05	0.000270103	0.000270103	0.6	1	0.394538	0.97144	385900	0.0243025	2.5	0.984771	1.00002	0.986345	0.000270103	0.000193767	0.000269065	00:00:00	507754	00:00:00			3.35332e+08	2022-11-21
2022-11-22	1.69193e+07	0			0.4	672.57	1594.42	2.03032e+08	110.999	2.5		0	2022-11-22	0.605456		1	4.2323e-05	5.70561e-05	0.000269668	0.000269668	0.6	1	0.394544	0.97144	386200	0.0243025	2.5	0.984771	1.00002	0.98636	0.000269668	0.00019333	0.000268629	00:00:00	507757	00:00:00			3.35337e+08	2022-11-22
2022-11-23	1.69194e+07	0			0.4	669.938	1588.15	2.03033e+08	110.566	2.5		0	2022-11-23	0.60545		1	4.21246e-05	5.68308e-05	0.000269234	0.000269234	0.6	1	0.39455	0.97144	386500	0.0243025	2.5	0.984771	1.00002	0.986375	0.000269234	0.000192893	0.000268194	00:00:00	507759	00:00:00			3.35343e+08	2022-11-23
2022-11-24	1.69195e+07	0			0.4	667.319	1581.91	2.03034e+08	110.135	2.5		0	2022-11-24	0.605444		1	4.19274e-05	5.66068e-05	0.0002688	0.0002688	0.6	1	0.394556	0.97144	386800	0.0243025	2.5	0.984771	1.00002	0.98639	0.0002688	0.000192457	0.00026776	00:00:00	507762	00:00:00			3.35348e+08	2022-11-24
2022-11-25	1.69197e+07	0			0.4	664.713	1575.71	2.03036e+08	109.706	2.5		0	2022-11-25	0.605438		1	4.17313e-05	5.63838e-05	0.000268367	0.000268367	0.6	1	0.394562	0.97144	387100	0.0243025	2.5	0.984771	1.00002	0.986405	0.000268367	0.000192023	0.000267326	00:00:00	507765	00:00:00			3.35354e+08	2022-11-25
2022-11-26	1.69198e+07	0			0.4	662.121	1569.54	2.03037e+08	109.279	2.5		0	2022-11-26	0.605432		1	4.15364e-05	5.6162e-05	0.000267935	0.000267935	0.6	1	0.394568	0.97144	387400	0.0243025	2.5	0.984771	1.00002	0.98642	0.000267935	0.000191589	0.000266893	00:00:00	507768	00:00:00			3.35359e+08	2022-11-26
2022-11-27	1.69199e+07	0			0.4	659.541	1563.39	2.03038e+08	108.855	2.5		0	2022-11-27	0.605426		1	4.13425e-05	5.59413e-05	0.000267504	0.000267504	0.6	1	0.394574	0.97144	387700	0.0243025	2.5	0.984771	1.00002	0.986435	0.000267504	0.000191157	0.000266461	00:00:00	507771	00:00:00			3.35365e+08	2022-11-27
2022-11-28	1.692e+07	0			0.4	656.974	1557.28	2.0304e+08	108.432	2.5		0	2022-11-28	0.60542		1	4.11498e-05	5.57217e-05	0.000267074	0.000267074	0.6	1	0.39458	0.97144	388000	0.0243025	2.5	0.984771	1.00002	0.986451	0.000267074	0.000190725	0.00026603	00:00:00	507773	00:00:00			3.3537e+08	2022-11-28
2022-11-29	1.69201e+07	0			0.4	654.42	1551.2	2.03041e+08	108.012	2.5		0	2022-11-29	0.605414		1	4.09581e-05	5.55032e-05	0.000266644	0.000266644	0.6	1	0.394586	0.97144	388300	0.0243025	2.5	0.984771	1.00002	0.986466	0.000266644	0.000190295	0.0002656	00:00:00	507776	00:00:00			3.35376e+08	2022-11-29
2022-11-30	1.69202e+07	0			0.4	651.879	1545.15	2.03042e+08	107.594	2.5		0	2022-11-30	0.605408		1	4.07676e-05	5.52858e-05	0.000266215	0.000266215	0.6	1	0.394592	0.97144	388600	0.0243025	2.5	0.984771	1.00002	0.986481	0.000266215	0.000189865	0.00026517	00:00:00	507779	00:00:00			3.35381e+08	2022-11-30
2022-12-01	1.69203e+07	0			0.4	649.35	1539.13	2.03044e+08	107.178	2.5		0	2022-12-01	0.605401		1	4.05781e-05	5.50694e-05	0.000265787	0.000265787	0.6	1	0.394599	0.97144	388900	0.0243025	2.5	0.984771	1.00002	0.986496	0.000265787	0.000189437	0.000264741	00:00:00	507782	00:00:00			3.35387e+08	2022-12-01
2022-12-02	1.69204e+07	0			0.4	646.835	1533.14	2.03045e+08	106.764	2.5		0	2022-12-02	0.605395		1	4.03898e-05	5.48542e-05	0.000265359	0.000265359	0.6	1	0.394605	0.97144	389200	0.0243025	2.5	0.984771	1.00002	0.986512	0.000265359	0.000189009	0.000264312	00:00:00	507784	00:00:00			3.35392e+08	2022-12-02
2022-12-03	1.69205e+07	0			0.4	644.331	1527.18	2.03046e+08	106.352	2.5		0	2022-12-03	0.605389		1	4.02025e-05	5.46401e-05	0.000264932	0.000264932	0.6	1	0.394611	0.97144	389500	0.0243025	2.5	0.984771	1.00002	0.986527	0.000264932	0.000188583	0.000263885	00:00:00	507787	00:00:00			3.35398e+08	2022-12-03
2022-12-04	1.69206e+07	0			0.4	641.841	1521.25	2.03047e+08	105.942	2.5		0	2022-12-04	0.605383		1	4.00162e-05	5.4427e-05	0.000264506	0.000264506	0.6	1	0.394617	0.97144	389800	0.0243025	2.5	0.984771	1.00002	0.986543	0.000264506	0.000188157	0.000263458	00:00:00	507790	00:00:00			3.35403e+08	2022-12-04
2022-12-05	1.69207e+07	0			0.4	639.362	1515.35	2.03049e+08	105.534	2.5		0	2022-12-05	0.605377		1	3.98311e-05	5.4215e-05	0.000264081	0.000264081	0.6	1	0.394623	0.97144	390100	0.0243025	2.5	0.984771	1.00002	0.986558	0.000264081	0.000187733	0.000263032	00:00:00	507793	00:00:00			3.35409e+08	2022-12-05
2022-12-06	1.69208e+07	0			0.4	636.897	1509.48	2.0305e+08	105.128	2.5		0	2022-12-06	0.605371		1	3.9647e-05	5.4004e-05	0.000263657	0.000263657	0.6	1	0.394629	0.97144	390400	0.0243025	2.5	0.984771	1.00002	0.986573	0.000263657	0.000187309	0.000262607	00:00:00	507795	00:00:00			3.35414e+08	2022-12-06
2022-12-07	1.69209e+07	0			0.4	634.443	1503.63	2.03051e+08	104.724	2.5		0	2022-12-07	0.605364		1	3.94639e-05	5.37941e-05	0.000263233	0.000263233	0.6	1	0.394636	0.97144	390700	0.0243025	2.5	0.984771	1.00002	0.986589	0.000263233	0.000186887	0.000262182	00:00:00	507798	00:00:00			3.3542e+08	2022-12-07
2022-12-08	1.6921e+07	0			0.4	632.002	1497.82	2.03052e+08	104.322	2.5		0	2022-12-08	0.605358		1	3.92819e-05	5.35853e-05	0.00026281	0.00026281	0.6	1	0.394642	0.97144	391000	0.0243025	2.5	0.984771	1.00002	0.986605	0.00026281	0.000186465	0.000261758	00:00:00	507801	00:00:00			3.35425e+08	2022-12-08
2022-12-09	1.69211e+07	0			0.4	629.573	1492.04	2.03054e+08	103.923	2.5		0	2022-12-09	0.605352		1	3.91009e-05	5.33775e-05	0.000262387	0.000262387	0.6	1	0.394648	0.97144	391300	0.0243025	2.5	0.984771	1.00002	0.98662	0.000262387	0.000186045	0.000261335	00:00:00	507803	00:00:00			3.35431e+08	2022-12-09
2022-12-10	1.69212e+07	0			0.4	627.156	1486.28	2.03055e+08	103.525	2.5		0	2022-12-10	0.605346		1	3.8921e-05	5.31708e-05	0.000261966	0.000261966	0.6	1	0.394654	0.97144	391600	0.0243025	2.5	0.984771	1.00002	0.986636	0.000261966	0.000185625	0.000260913	00:00:00	507806	00:00:00			3.35436e+08	2022-12-10
2022-12-11	1.69214e+07	0			0.4	624.751	1480.56	2.03056e+08	103.129	2.5		0	2022-12-11	0.605339		1	3.87421e-05	5.29651e-05	0.000261545	0.000261545	0.6	1	0.394661	0.97144	391900	0.0243025	2.5	0.984771	1.00002	0.986651	0.000261545	0.000185207	0.000260491	00:00:00	507808	00:00:00			3.35442e+08	2022-12-11
2022-12-12	1.69215e+07	0			0.4	622.359	1474.86	2.03057e+08	102.735	2.5		0	2022-12-12	0.605333		1	3.85642e-05	5.27604e-05	0	0	0.6	1	0.394667	0.97144	392200	0.0243025	2.5	0.984771	1.00002	0.986667	0.000261545	0.000185207	0.000260491	00:00:00	507811	00:00:00			3.35447e+08	2022-12-12
2022-12-13	1.69216e+07	0			0.4	619.978	1469.19	2.03059e+08	102.343	2.5		0	2022-12-13	0.605327		1	3.83873e-05	5.25567e-05	0	0	0.6	1	0.394673	0.97144	392500	0.0243025	2.5	0.984771	1.00002	0.986683	0.000261545	0.000185207	0.000260491	00:00:00	507814	00:00:00			3.35453e+08	2022-12-13
2022-12-14	1.69217e+07	0			0.4	617.609	1463.55	2.0306e+08	101.954	2.5		0	2022-12-14	0.605321		1	3.82114e-05	5.23541e-05	0	0	0.6	1	0.394679	0.97144	392800	0.0243025	2.5	0.984771	1.00002	0.986699	0.000261545	0.000185207	0.000260491	00:00:00	507816	00:00:00			3.35458e+08	2022-12-14
2022-12-15	1.69218e+07	0			0.4	615.252	1457.94	2.03061e+08	101.566	2.5		0	2022-12-15	0.605314		1	3.80365e-05	5.21525e-05	0	0	0.6	1	0.394686	0.97144	393100	0.0243025	2.5	0.984771	1.00002	0.986714	0.000261545	0.000185207	0.000260491	00:00:00	507819	00:00:00			3.35464e+08	2022-12-15
2022-12-16	1.69219e+07	0			0.4	612.907	1452.36	2.03062e+08	101.18	2.5		0	2022-12-16	0.605308		1	3.78626e-05	5.19519e-05	0	0	0.6	1	0.394692	0.97144	393400	0.0243025	2.5	0.984771	1.00002	0.98673	0.000261545	0.000185207	0.000260491	00:00:00	507821	00:00:00			3.35469e+08	2022-12-16
2022-12-17	1.6922e+07	0			0.4	610.573	1446.8	2.03064e+08	100.796	2.5		0	2022-12-17	0.605302		1	3.76897e-05	5.17523e-05	0	0	0.6	1	0.394698	0.97144	393700	0.0243025	2.5	0.984771	1.00002	0.986746	0.000261545	0.000185207	0.000260491	00:00:00	507824	00:00:00			3.35475e+08	2022-12-17
2022-12-18	1.69221e+07	0			0.4	608.251	1441.27	2.03065e+08	100.413	2.5		0	2022-12-18	0.605295		1	3.75178e-05	5.15537e-05	0	0	0.6	1	0.394705	0.97144	394000	0.0243025	2.5	0.984771	1.00002	0.986762	0.000261545	0.000185207	0.000260491	00:00:00	507827	00:00:00			3.3548e+08	2022-12-18
2022-12-19	1.69222e+07	0			0.4	605.941	1435.77	2.03066e+08	100.033	2.5		0	2022-12-19	0.605289		1	3.73469e-05	5.13561e-05	0	0	0.6	1	0.394711	0.97144	394300	0.0243025	2.5	0.984771	1.00002	0.986778	0.000261545	0.000185207	0.000260491	00:00:00	507829	00:00:00			3.35486e+08	2022-12-19
2022-12-20	1.69223e+07	0			0.4	603.642	1430.3	2.03067e+08	99.6549	2.5		0	2022-12-20	0.605282		1	3.71769e-05	5.11595e-05	0	0	0.6	1	0.394718	0.97144	394600	0.0243025	2.5	0.984771	1.00002	0.986794	0.000261545	0.000185207	0.000260491	00:00:00	507832	00:00:00			3.35492e+08	2022-12-20
2022-12-21	1.69224e+07	0			0.4	601.355	1424.85	2.03068e+08	99.2784	2.5		0	2022-12-21	0.605276		1	3.70079e-05	5.09639e-05	0	0	0.6	1	0.394724	0.97144	394900	0.0243025	2.5	0.984771	1.00002	0.98681	0.000261545	0.000185207	0.000260491	00:00:00	507834	00:00:00			3.35497e+08	2022-12-21
2022-12-22	1.69225e+07	0			0.4	599.079	1419.43	2.0307e+08	98.9039	2.5		0	2022-12-22	0.60527		1	3.68399e-05	5.07692e-05	0	0	0.6	1	0.39473	0.97144	395200	0.0243025	2.5	0.984771	1.00002	0.986826	0.000261545	0.000185207	0.000260491	00:00:00	507837	00:00:00			3.35503e+08	2022-12-22
2022-12-23	1.69226e+07	0			0.4	596.815	1414.04	2.03071e+08	98.5312	2.5		0	2022-12-23	0.605263		1	3.66728e-05	5.05756e-05	0	0	0.6	1	0.394737	0.97144	395500	0.0243025	2.5	0.984771	1.00002	0.986842	0.000261545	0.000185207	0.000260491	00:00:00	507839	00:00:00			3.35508e+08	2022-12-23
2022-12-24	1.69227e+07	0			0.4	594.562	1408.68	2.03072e+08	98.1603	2.5		0	2022-12-24	0.605257		1	3.65067e-05	5.03829e-05	0	0	0.6	1	0.394743	0.97144	395800	0.0243025	2.5	0.984771	1.00002	0.986858	0.000261545	0.000185207	0.000260491	00:00:00	507842	00:00:00			3.35514e+08	2022-12-24
2022-12-25	1.69228e+07	0			0.4	592.32	1403.34	2.03073e+08	97.7914	2.5		0	2022-12-25	0.60525		1	3.63415e-05	5.01911e-05	0	0	0.6	1	0.39475	0.97144	396100	0.0243025	2.5	0.984771	1.00002	0.986874	0.000261545	0.000185207	0.000260491	00:00:00	507844	00:00:00			3.35519e+08	2022-12-25
2022-12-26	1.69229e+07	0			0.4	590.089	1398.03	2.03074e+08	97.4242	2.5		0	2022-12-26	0.605244		1	3.61772e-05	5.00003e-05	0	0	0.6	1	0.394756	0.97144	396400	0.0243025	2.5	0.984771	1.00002	0.98689	0.000261545	0.000185207	0.000260491	00:00:00	507847	00:00:00			3.35525e+08	2022-12-26
2022-12-27	1.69229e+07	0			0.4	587.87	1392.74	2.03075e+08	97.0589	2.5		0	2022-12-27	0.605237		1	3.60139e-05	4.98105e-05	0	0	0.6	1	0.394763	0.97144	396700	0.0243025	2.5	0.984771	1.00002	0.986906	0.000261545	0.000185207	0.000260491	00:00:00	507849	00:00:00			3.3553e+08	2022-12-27
2022-12-28	1.6923e+07	0			0.4	585.661	1387.49	2.03077e+08	96.6954	2.5		0	2022-12-28	0.605231		1	3.58515e-05	4.96217e-05	0	0	0.6	1	0.394769	0.97144	397000	0.0243025	2.5	0.984771	1.00002	0.986923	0.000261545	0.000185207	0.000260491	00:00:00	507852	00:00:00			3.35536e+08	2022-12-28
2022-12-29	1.69231e+07	0			0.4	583.464	1382.25	2.03078e+08	96.3338	2.5		0	2022-12-29	0.605224		1	3.569e-05	4.94337e-05	0	0	0.6	1	0.394776	0.97144	397300	0.0243025	2.5	0.984771	1.00002	0.986939	0.000261545	0.000185207	0.000260491	00:00:00	507854	00:00:00			3.35541e+08	2022-12-29
2022-12-30	1.69232e+07	0			0.4	581.278	1377.05	2.03079e+08	95.9739	2.5		0	2022-12-30	0.605218		1	3.55294e-05	4.92468e-05	0	0	0.6	1	0.394782	0.97144	397600	0.0243025	2.5	0.984771	1.00002	0.986955	0.000261545	0.000185207	0.000260491	00:00:00	507857	00:00:00			3.35547e+08	2022-12-30
2022-12-31	1.69233e+07	0			0.4	579.102	1371.87	2.0308e+08	95.6158	2.5		0	2022-12-31	0.605211		1	3.53698e-05	4.90607e-05	0	0	0.6	1	0.394789	0.97144	397900	0.0243025	2.5	0.984771	1.00002	0.986972	0.000261545	0.000185207	0.000260491	00:00:00	507859	00:00:00			3.35552e+08	2022-12-31
2023-01-01	1.69234e+07	0			0.4	576.937	1366.71	2.03081e+08	95.2595	2.5		0	2023-01-01	0.605205		1	3.5211e-05	4.88756e-05	0	0	0.6	1	0.394795	0.97144	398200	0.0243025	2.5	0.984771	1.00002	0.986988	0.000261545	0.000185207	0.000260491	00:00:00	507861	00:00:00			3.35558e+08	2023-01-01
2023-01-02	1.69235e+07	0			0.4	574.784	1361.59	2.03082e+08	94.905	2.5		0	2023-01-02	0.605198		1	3.50531e-05	4.86914e-05	0	0	0.6	1	0.394802	0.97144	398500	0.0243025	2.5	0.984771	1.00002	0.987004	0.000261545	0.000185207	0.000260491	00:00:00	507864	00:00:00			3.35563e+08	2023-01-02
2023-01-03	1.69236e+07	0			0.4	572.64	1356.48	2.03083e+08	94.5523	2.5		0	2023-01-03	0.605192		1	3.48962e-05	4.85081e-05	0	0	0.6	1	0.394808	0.97144	398800	0.0243025	2.5	0.984771	1.00002	0.987021	0.000261545	0.000185207	0.000260491	00:00:00	507866	00:00:00			3.35569e+08	2023-01-03
2023-01-04	1.69237e+07	0			0.4	570.508	1351.41	2.03085e+08	94.2013	2.5		0	2023-01-04	0.605185		1	3.47401e-05	4.83258e-05	0	0	0.6	1	0.394815	0.97144	399100	0.0243025	2.5	0.984771	1.00002	0.987037	0.000261545	0.000185207	0.000260491	00:00:00	507869	00:00:00			3.35574e+08	2023-01-04
2023-01-05	1.69238e+07	0			0.4	568.386	1346.36	2.03086e+08	93.8521	2.5		0	2023-01-05	0.605179		1	3.45849e-05	4.81443e-05	0	0	0.6	1	0.394821	0.97144	399400	0.0243025	2.5	0.984771	1.00002	0.987054	0.000261545	0.000185207	0.000260491	00:00:00	507871	00:00:00			3.3558e+08	2023-01-05
2023-01-06	1.69239e+07	0			0.4	566.275	1341.33	2.03087e+08	93.5046	2.5		0	2023-01-06	0.605172		1	3.44306e-05	4.79638e-05	0	0	0.6	1	0.394828	0.97144	399700	0.0243025	2.5	0.984771	1.00002	0.98707	0.000261545	0.000185207	0.000260491	00:00:00	507873	00:00:00			3.35585e+08	2023-01-06
2023-01-07	1.6924e+07	0			0.4	564.174	1336.33	2.03088e+08	93.1588	2.5		0	2023-01-07	0.605165		1	3.42771e-05	4.77842e-05	0	0	0.6	1	0.394835	0.97144	400000	0.0243025	2.5	0.984771	1.00002	0.987087	0.000261545	0.000185207	0.000260491	00:00:00	507876	00:00:00			3.35591e+08	2023-01-07
2023-01-08	1.69241e+07	0			0.4	562.084	1331.35	2.03089e+08	92.8148	2.5		0	2023-01-08	0.605159		1	3.41245e-05	4.76054e-05	0	0	0.6	1	0.394841	0.97144	400300	0.0243025	2.5	0.984771	1.00002	0.987103	0.000261545	0.000185207	0.000260491	00:00:00	507878	00:00:00			3.35596e+08	2023-01-08
2023-01-09	1.69242e+07	0			0.4	560.004	1326.4	2.0309e+08	92.4725	2.5		0	2023-01-09	0.605152		1	3.39728e-05	4.74276e-05	0	0	0.6	1	0.394848	0.97144	400600	0.0243025	2.5	0.984771	1.00002	0.98712	0.000261545	0.000185207	0.000260491	00:00:00	507881	00:00:00			3.35602e+08	2023-01-09
2023-01-10	1.69243e+07	0			0.4	557.935	1321.47	2.03091e+08	92.1319	2.5		0	2023-01-10	0.605145		1	3.38219e-05	4.72506e-05	0	0	0.6	1	0.394855	0.97144	400900	0.0243025	2.5	0.984771	1.00002	0.987137	0.000261545	0.000185207	0.000260491	00:00:00	507883	00:00:00			3.35607e+08	2023-01-10
2023-01-11	1.69244e+07	0			0.4	555.876	1316.57	2.03092e+08	91.793	2.5		0	2023-01-11	0.605139		1	3.36719e-05	4.70746e-05	0	0	0.6	1	0.394861	0.97144	401200	0.0243025	2.5	0.984771	1.00002	0.987153	0.000261545	0.000185207	0.000260491	00:00:00	507885	00:00:00			3.35613e+08	2023-01-11
2023-01-12	1.69245e+07	0			0.4	553.827	1311.69	2.03093e+08	91.4557	2.5		0	2023-01-12	0.605132		1	3.35227e-05	4.68994e-05	0	0	0.6	1	0.394868	0.97144	401500	0.0243025	2.5	0.984771	1.00002	0.98717	0.000261545	0.000185207	0.000260491	00:00:00	507888	00:00:00			3.35618e+08	2023-01-12
2023-01-13	1.69245e+07	0			0.4	551.788	1306.84	2.03095e+08	91.1202	2.5		0	2023-01-13	0.605125		1	3.33744e-05	4.67251e-05	0	0	0.6	1	0.394875	0.97144	401800	0.0243025	2.5	0.984771	1.00002	0.987187	0.000261545	0.000185207	0.000260491	00:00:00	507890	00:00:00			3.35624e+08	2023-01-13
2023-01-14	1.69246e+07	0			0.4	549.76	1302.01	2.03096e+08	90.7863	2.5		0	2023-01-14	0.605119		1	3.32269e-05	4.65516e-05	0	0	0.6	1	0.394881	0.97144	402100	0.0243025	2.5	0.984771	1.00002	0.987203	0.000261545	0.000185207	0.000260491	00:00:00	507892	00:00:00			3.35629e+08	2023-01-14
2023-01-15	1.69247e+07	0			0.4	547.741	1297.2	2.03097e+08	90.4541	2.5		0	2023-01-15	0.605112		1	3.30802e-05	4.63791e-05	0	0	0.6	1	0.394888	0.97144	402400	0.0243025	2.5	0.984771	1.00002	0.98722	0.000261545	0.000185207	0.000260491	00:00:00	507895	00:00:00			3.35635e+08	2023-01-15
2023-01-16	1.69248e+07	0			0.4	545.733	1292.42	2.03098e+08	90.1235	2.5		0	2023-01-16	0.605105		1	3.29344e-05	4.62073e-05	0	0	0.6	1	0.394895	0.97144	402700	0.0243025	2.5	0.984771	1.00002	0.987237	0.000261545	0.000185207	0.000260491	00:00:00	507897	00:00:00			3.3564e+08	2023-01-16
2023-01-17	1.69249e+07	0			0.4	543.734	1287.66	2.03099e+08	89.7946	2.5		0	2023-01-17	0.605098		1	3.27893e-05	4.60365e-05	0	0	0.6	1	0.394902	0.97144	403000	0.0243025	2.5	0.984771	1.00002	0.987254	0.000261545	0.000185207	0.000260491	00:00:00	507899	00:00:00			3.35646e+08	2023-01-17
2023-01-18	1.6925e+07	0			0.4	541.746	1282.93	2.031e+08	89.4673	2.5		0	2023-01-18	0.605092		1	3.26451e-05	4.58665e-05	0	0	0.6	1	0.394908	0.97144	403300	0.0243025	2.5	0.984771	1.00002	0.987271	0.000261545	0.000185207	0.000260491	00:00:00	507901	00:00:00			3.35651e+08	2023-01-18
2023-01-19	1.69251e+07	0			0.4	539.767	1278.22	2.03101e+08	89.1416	2.5		0	2023-01-19	0.605085		1	3.25017e-05	4.56973e-05	0	0	0.6	1	0.394915	0.97144	403600	0.0243025	2.5	0.984771	1.00002	0.987288	0.000261545	0.000185207	0.000260491	00:00:00	507904	00:00:00			3.35657e+08	2023-01-19
2023-01-20	1.69252e+07	0			0.4	537.799	1273.53	2.03102e+08	88.8176	2.5		0	2023-01-20	0.605078		1	3.23591e-05	4.5529e-05	0	0	0.6	1	0.394922	0.97144	403900	0.0243025	2.5	0.984771	1.00002	0.987304	0.000261545	0.000185207	0.000260491	00:00:00	507906	00:00:00			3.35663e+08	2023-01-20
2023-01-21	1.69253e+07	0			0.4	535.84	1268.87	2.03103e+08	88.4952	2.5		0	2023-01-21	0.605071		1	3.22173e-05	4.53615e-05	0	0	0.6	1	0.394929	0.97144	404200	0.0243025	2.5	0.984771	1.00002	0.987321	0.000261545	0.000185207	0.000260491	00:00:00	507908	00:00:00			3.35668e+08	2023-01-21
2023-01-22	1.69253e+07	0			0.4	533.891	1264.23	2.03104e+08	88.1744	2.5		0	2023-01-22	0.605065		1	3.20763e-05	4.51949e-05	0	0	0.6	1	0.394935	0.97144	404500	0.0243025	2.5	0.984771	1.00002	0.987338	0.000261545	0.000185207	0.000260491	00:00:00	507910	00:00:00			3.35674e+08	2023-01-22
2023-01-23	1.69254e+07	0			0.4	531.951	1259.61	2.03105e+08	87.8551	2.5		0	2023-01-23	0.605058		1	3.19361e-05	4.50291e-05	0	0	0.6	1	0.394942	0.97144	404800	0.0243025	2.5	0.984771	1.00002	0.987355	0.000261545	0.000185207	0.000260491	00:00:00	507913	00:00:00			3.35679e+08	2023-01-23
2023-01-24	1.69255e+07	0			0.4	530.021	1255.02	2.03106e+08	87.5375	2.5		0	2023-01-24	0.605051		1	3.17967e-05	4.48641e-05	0	0	0.6	1	0.394949	0.97144	405100	0.0243025	2.5	0.984771	1.00002	0.987372	0.000261545	0.000185207	0.000260491	00:00:00	507915	00:00:00			3.35685e+08	2023-01-24
2023-01-25	1.69256e+07	0			0.4	528.101	1250.44	2.03107e+08	87.2214	2.5		0	2023-01-25	0.605044		1	3.16581e-05	4.47e-05	0	0	0.6	1	0.394956	0.97144	405400	0.0243025	2.5	0.984771	1.00002	0.98739	0.000261545	0.000185207	0.000260491	00:00:00	507917	00:00:00			3.3569e+08	2023-01-25
2023-01-26	1.69257e+07	0			0.4	526.191	1245.9	2.03108e+08	86.9069	2.5		0	2023-01-26	0.605037		1	3.15202e-05	4.45366e-05	0	0	0.6	1	0.394963	0.97144	405700	0.0243025	2.5	0.984771	1.00002	0.987407	0.000261545	0.000185207	0.000260491	00:00:00	507919	00:00:00			3.35696e+08	2023-01-26
2023-01-27	1.69258e+07	0			0.4	524.289	1241.37	2.03109e+08	86.594	2.5		0	2023-01-27	0.60503		1	3.13831e-05	4.43741e-05	0	0	0.6	1	0.39497	0.97144	406000	0.0243025	2.5	0.984771	1.00002	0.987424	0.000261545	0.000185207	0.000260491	00:00:00	507922	00:00:00			3.35701e+08	2023-01-27
2023-01-28	1.69259e+07	0			0.4	522.398	1236.87	2.0311e+08	86.2826	2.5		0	2023-01-28	0.605024		1	3.12468e-05	4.42124e-05	0	0	0.6	1	0.394976	0.97144	406300	0.0243025	2.5	0.984771	1.00002	0.987441	0.000261545	0.000185207	0.000260491	00:00:00	507924	00:00:00			3.35707e+08	2023-01-28
2023-01-29	1.6926e+07	0			0.4	520.515	1232.38	2.03111e+08	85.9728	2.5		0	2023-01-29	0.605017		1	3.11112e-05	4.40515e-05	0	0	0.6	1	0.394983	0.97144	406600	0.0243025	2.5	0.984771	1.00002	0.987458	0.000261545	0.000185207	0.000260491	00:00:00	507926	00:00:00			3.35712e+08	2023-01-29
2023-01-30	1.6926e+07	0			0.4	518.642	1227.93	2.03113e+08	85.6645	2.5		0	2023-01-30	0.60501		1	3.09764e-05	4.38914e-05	0	0	0.6	1	0.39499	0.97144	406900	0.0243025	2.5	0.984771	1.00002	0.987475	0.000261545	0.000185207	0.000260491	00:00:00	507928	00:00:00			3.35718e+08	2023-01-30
2023-01-31	1.69261e+07	0			0.4	516.779	1223.49	2.03114e+08	85.3577	2.5		0	2023-01-31	0.605003		1	3.08424e-05	4.37321e-05	0	0	0.6	1	0.394997	0.97144	407200	0.0243025	2.5	0.984771	1.00002	0.987493	0.000261545	0.000185207	0.000260491	00:00:00	507930	00:00:00			3.35723e+08	2023-01-31
2023-02-01	1.69262e+07	0			0.4	514.924	1219.07	2.03115e+08	85.0525	2.5		0	2023-02-01	0.604996		1	3.07091e-05	4.35735e-05	0	0	0.6	1	0.395004	0.97144	407500	0.0243025	2.5	0.984771	1.00002	0.98751	0.000261545	0.000185207	0.000260491	00:00:00	507933	00:00:00			3.35729e+08	2023-02-01
2023-02-02	1.69263e+07	0			0.4	513.079	1214.68	2.03116e+08	84.7488	2.5		0	2023-02-02	0.604989		1	3.05765e-05	4.34158e-05	0	0	0.6	1	0.395011	0.97144	407800	0.0243025	2.5	0.984771	1.00002	0.987527	0.000261545	0.000185207	0.000260491	00:00:00	507935	00:00:00			3.35734e+08	2023-02-02
2023-02-03	1.69264e+07	0			0.4	511.243	1210.31	2.03117e+08	84.4466	2.5		0	2023-02-03	0.604982		1	3.04447e-05	4.32589e-05	0	0	0.6	1	0.395018	0.97144	408100	0.0243025	2.5	0.984771	1.00002	0.987544	0.000261545	0.000185207	0.000260491	00:00:00	507937	00:00:00			3.3574e+08	2023-02-03
2023-02-04	1.69265e+07	0			0.4	509.416	1205.96	2.03118e+08	84.1458	2.5		0	2023-02-04	0.604975		1	3.03136e-05	4.31027e-05	0	0	0.6	1	0.395025	0.97144	408400	0.0243025	2.5	0.984771	1.00002	0.987562	0.000261545	0.000185207	0.000260491	00:00:00	507939	00:00:00			3.35745e+08	2023-02-04
2023-02-05	1.69266e+07	0			0.4	507.598	1201.63	2.03119e+08	83.8466	2.5		0	2023-02-05	0.604968		1	3.01833e-05	4.29473e-05	0	0	0.6	1	0.395032	0.97144	408700	0.0243025	2.5	0.984771	1.00002	0.987579	0.000261545	0.000185207	0.000260491	00:00:00	507941	00:00:00			3.35751e+08	2023-02-05
2023-02-06	1.69266e+07	0			0.4	505.789	1197.33	2.0312e+08	83.5489	2.5		0	2023-02-06	0.604961		1	3.00536e-05	4.27927e-05	0	0	0.6	1	0.395039	0.97144	409000	0.0243025	2.5	0.984771	1.00002	0.987597	0.000261545	0.000185207	0.000260491	00:00:00	507943	00:00:00			3.35756e+08	2023-02-06
2023-02-07	1.69267e+07	0			0.4	503.989	1193.04	2.03121e+08	83.2526	2.5		0	2023-02-07	0.604954		1	2.99247e-05	4.26389e-05	0	0	0.6	1	0.395046	0.97144	409300	0.0243025	2.5	0.984771	1.00002	0.987614	0.000261545	0.000185207	0.000260491	00:00:00	507945	00:00:00			3.35762e+08	2023-02-07
2023-02-08	1.69268e+07	0			0.4	502.198	1188.78	2.03122e+08	82.9578	2.5		0	2023-02-08	0.604947		1	2.97966e-05	4.24858e-05	0	0	0.6	1	0.395053	0.97144	409600	0.0243025	2.5	0.984771	1.00002	0.987631	0.000261545	0.000185207	0.000260491	00:00:00	507948	00:00:00			3.35767e+08	2023-02-08
2023-02-09	1.69269e+07	0			0.4	500.416	1184.54	2.03123e+08	82.6645	2.5		0	2023-02-09	0.60494		1	2.96691e-05	4.23335e-05	0	0	0.6	1	0.39506	0.97144	409900	0.0243025	2.5	0.984771	1.00002	0.987649	0.000261545	0.000185207	0.000260491	00:00:00	507950	00:00:00			3.35773e+08	2023-02-09
2023-02-10	1.6927e+07	0			0.4	498.643	1180.31	2.03124e+08	82.3726	2.5		0	2023-02-10	0.604933		1	2.95423e-05	4.21819e-05	0	0	0.6	1	0.395067	0.97144	410200	0.0243025	2.5	0.984771	1.00002	0.987666	0.000261545	0.000185207	0.000260491	00:00:00	507952	00:00:00			3.35778e+08	2023-02-10
2023-02-11	1.6927e+07	0			0.4	496.879	1176.11	2.03125e+08	82.0822	2.5		0	2023-02-11	0.604926		1	2.94163e-05	4.20311e-05	0	0	0.6	1	0.395074	0.97144	410500	0.0243025	2.5	0.984771	1.00002	0.987684	0.000261545	0.000185207	0.000260491	00:00:00	507954	00:00:00			3.35784e+08	2023-02-11
2023-02-12	1.69271e+07	0			0.4	495.123	1171.93	2.03126e+08	81.7932	2.5		0	2023-02-12	0.604919		1	2.92909e-05	4.1881e-05	0	0	0.6	1	0.395081	0.97144	410800	0.0243025	2.5	0.984771	1.00002	0.987701	0.000261545	0.000185207	0.000260491	00:00:00	507956	00:00:00			3.35789e+08	2023-02-12
2023-02-13	1.69272e+07	0			0.4	493.376	1167.78	2.03127e+08	81.5056	2.5		0	2023-02-13	0.604912		1	2.91663e-05	4.17317e-05	0	0	0.6	1	0.395088	0.97144	411100	0.0243025	2.5	0.984771	1.00002	0.987719	0.000261545	0.000185207	0.000260491	00:00:00	507958	00:00:00			3.35795e+08	2023-02-13
2023-02-14	1.69273e+07	0			0.4	491.637	1163.64	2.03128e+08	81.2194	2.5		0	2023-02-14	0.604905		1	2.90423e-05	4.15832e-05	0	0	0.6	1	0.395095	0.97144	411400	0.0243025	2.5	0.984771	1.00002	0.987737	0.000261545	0.000185207	0.000260491	00:00:00	507960	00:00:00			3.358e+08	2023-02-14
2023-02-15	1.69274e+07	0			0.4	489.908	1159.52	2.03128e+08	80.9347	2.5		0	2023-02-15	0.604898		1	2.89191e-05	4.14353e-05	0	0	0.6	1	0.395102	0.97144	411700	0.0243025	2.5	0.984771	1.00002	0.987754	0.000261545	0.000185207	0.000260491	00:00:00	507962	00:00:00			3.35806e+08	2023-02-15
2023-02-16	1.69275e+07	0			0.4	488.186	1155.42	2.03129e+08	80.6514	2.5		0	2023-02-16	0.604891		1	2.87965e-05	4.12882e-05	0	0	0.6	1	0.395109	0.97144	412000	0.0243025	2.5	0.984771	1.00002	0.987772	0.000261545	0.000185207	0.000260491	00:00:00	507964	00:00:00			3.35812e+08	2023-02-16
2023-02-17	1.69275e+07	0			0.4	486.474	1151.34	2.0313e+08	80.3695	2.5		0	2023-02-17	0.604884		1	2.86746e-05	4.11419e-05	0	0	0.6	1	0.395116	0.97144	412300	0.0243025	2.5	0.984771	1.00002	0.98779	0.000261545	0.000185207	0.000260491	00:00:00	507966	00:00:00			3.35817e+08	2023-02-17
2023-02-18	1.69276e+07	0			0.4	484.77	1147.29	2.03131e+08	80.089	2.5		0	2023-02-18	0.604877		1	2.85533e-05	4.09962e-05	0	0	0.6	1	0.395123	0.97144	412600	0.0243025	2.5	0.984771	1.00002	0.987807	0.000261545	0.000185207	0.000260491	00:00:00	507968	00:00:00			3.35823e+08	2023-02-18
2023-02-19	1.69277e+07	0			0.4	483.074	1143.25	2.03132e+08	79.8098	2.5		0	2023-02-19	0.60487		1	2.84328e-05	4.08513e-05	0	0	0.6	1	0.39513	0.97144	412900	0.0243025	2.5	0.984771	1.00002	0.987825	0.000261545	0.000185207	0.000260491	00:00:00	507970	00:00:00			3.35828e+08	2023-02-19
2023-02-20	1.69278e+07	0			0.4	481.386	1139.23	2.03133e+08	79.5321	2.5		0	2023-02-20	0.604863		1	2.83129e-05	4.07071e-05	0	0	0.6	1	0.395137	0.97144	413200	0.0243025	2.5	0.984771	1.00002	0.987843	0.000261545	0.000185207	0.000260491	00:00:00	507972	00:00:00			3.35834e+08	2023-02-20
2023-02-21	1.69279e+07	0			0.4	479.707	1135.24	2.03134e+08	79.2557	2.5		0	2023-02-21	0.604856		1	2.81937e-05	4.05636e-05	0	0	0.6	1	0.395144	0.97144	413500	0.0243025	2.5	0.984771	1.00002	0.987861	0.000261545	0.000185207	0.000260491	00:00:00	507974	00:00:00			3.35839e+08	2023-02-21
2023-02-22	1.69279e+07	0			0.4	478.037	1131.26	2.03135e+08	78.9807	2.5		0	2023-02-22	0.604849		1	2.80751e-05	4.04208e-05	0	0	0.6	1	0.395151	0.97144	413800	0.0243025	2.5	0.984771	1.00002	0.987878	0.000261545	0.000185207	0.000260491	00:00:00	507976	00:00:00			3.35845e+08	2023-02-22
2023-02-23	1.6928e+07	0			0.4	476.374	1127.3	2.03136e+08	78.707	2.5		0	2023-02-23	0.604842		1	2.79572e-05	4.02788e-05	0	0	0.6	1	0.395158	0.97144	414100	0.0243025	2.5	0.984771	1.00002	0.987896	0.000261545	0.000185207	0.000260491	00:00:00	507978	00:00:00			3.3585e+08	2023-02-23
2023-02-24	1.69281e+07	0			0.4	474.72	1123.36	2.03137e+08	78.4347	2.5		0	2023-02-24	0.604834		1	2.784e-05	4.01374e-05	0	0	0.6	1	0.395166	0.97144	414400	0.0243025	2.5	0.984771	1.00002	0.987914	0.000261545	0.000185207	0.000260491	00:00:00	507980	00:00:00			3.35856e+08	2023-02-24
2023-02-25	1.69282e+07	0			0.4	473.074	1119.45	2.03138e+08	78.1638	2.5		0	2023-02-25	0.604827		1	2.77234e-05	3.99968e-05	0	0	0.6	1	0.395173	0.97144	414700	0.0243025	2.5	0.984771	1.00002	0.987932	0.000261545	0.000185207	0.000260491	00:00:00	507982	00:00:00			3.35861e+08	2023-02-25
2023-02-26	1.69282e+07	0			0.4	471.436	1115.55	2.03139e+08	77.8941	2.5		0	2023-02-26	0.60482		1	2.76074e-05	3.98568e-05	0	0	0.6	1	0.39518	0.97144	415000	0.0243025	2.5	0.984771	1.00002	0.98795	0.000261545	0.000185207	0.000260491	00:00:00	507984	00:00:00			3.35867e+08	2023-02-26
2023-02-27	1.69283e+07	0			0.4	469.806	1111.67	2.0314e+08	77.6258	2.5		0	2023-02-27	0.604813		1	2.74921e-05	3.97175e-05	0	0	0.6	1	0.395187	0.97144	415300	0.0243025	2.5	0.984771	1.00002	0.987968	0.000261545	0.000185207	0.000260491	00:00:00	507986	00:00:00			3.35872e+08	2023-02-27
2023-02-28	1.69284e+07	0			0.4	468.184	1107.81	2.03141e+08	77.3589	2.5		0	2023-02-28	0.604806		1	2.73774e-05	3.95789e-05	0	0	0.6	1	0.395194	0.97144	415600	0.0243025	2.5	0.984771	1.00002	0.987986	0.000261545	0.000185207	0.000260491	00:00:00	507988	00:00:00			3.35878e+08	2023-02-28
2023-03-01	1.69285e+07	0			0.4	466.571	1103.97	2.03142e+08	77.0932	2.5		0	2023-03-01	0.604799		1	2.72634e-05	3.9441e-05	0	0	0.6	1	0.395201	0.97144	415900	0.0243025	2.5	0.984771	1.00002	0.988004	0.000261545	0.000185207	0.000260491	00:00:00	507990	00:00:00			3.35883e+08	2023-03-01
2023-03-02	1.69286e+07	0			0.4	464.965	1100.14	2.03143e+08	76.8289	2.5		0	2023-03-02	0.604791		1	2.71499e-05	3.93038e-05	0	0	0.6	1	0.395209	0.97144	416200	0.0243025	2.5	0.984771	1.00002	0.988022	0.000261545	0.000185207	0.000260491	00:00:00	507992	00:00:00			3.35889e+08	2023-03-02
2023-03-03	1.69286e+07	0			0.4	463.367	1096.34	2.03144e+08	76.5659	2.5		0	2023-03-03	0.604784		1	2.70371e-05	3.91673e-05	0	0	0.6	1	0.395216	0.97144	416500	0.0243025	2.5	0.984771	1.00002	0.98804	0.000261545	0.000185207	0.000260491	00:00:00	507994	00:00:00			3.35894e+08	2023-03-03
2023-03-04	1.69287e+07	0			0.4	461.777	1092.55	2.03144e+08	76.3041	2.5		0	2023-03-04	0.604777		1	2.6925e-05	3.90314e-05	0	0	0.6	1	0.395223	0.97144	416800	0.0243025	2.5	0.984771	1.00002	0.988058	0.000261545	0.000185207	0.000260491	00:00:00	507996	00:00:00			3.359e+08	2023-03-04
2023-03-05	1.69288e+07	0			0.4	460.195	1088.79	2.03145e+08	76.0437	2.5		0	2023-03-05	0.60477		1	2.68134e-05	3.88963e-05	0	0	0.6	1	0.39523	0.97144	417100	0.0243025	2.5	0.984771	1.00002	0.988076	0.000261545	0.000185207	0.000260491	00:00:00	507998	00:00:00			3.35905e+08	2023-03-05
2023-03-06	1.69289e+07	0			0.4	458.62	1085.04	2.03146e+08	75.7845	2.5		0	2023-03-06	0.604762		1	2.67025e-05	3.87617e-05	0	0	0.6	1	0.395238	0.97144	417400	0.0243025	2.5	0.984771	1.00002	0.988094	0.000261545	0.000185207	0.000260491	00:00:00	508000	00:00:00			3.35911e+08	2023-03-06
2023-03-07	1.69289e+07	0			0.4	457.054	1081.31	2.03147e+08	75.5267	2.5		0	2023-03-07	0.604755		1	2.65922e-05	3.86279e-05	0	0	0.6	1	0.395245	0.97144	417700	0.0243025	2.5	0.984771	1.00002	0.988112	0.000261545	0.000185207	0.000260491	00:00:00	508002	00:00:00			3.35916e+08	2023-03-07
2023-03-08	1.6929e+07	0			0.4	455.495	1077.6	2.03148e+08	75.2701	2.5		0	2023-03-08	0.604748		1	2.64825e-05	3.84947e-05	0	0	0.6	1	0.395252	0.97144	418000	0.0243025	2.5	0.984771	1.00002	0.98813	0.000261545	0.000185207	0.000260491	00:00:00	508004	00:00:00			3.35922e+08	2023-03-08
2023-03-09	1.69291e+07	0			0.4	453.944	1073.91	2.03149e+08	75.0147	2.5		0	2023-03-09	0.604741		1	2.63733e-05	3.83622e-05	0	0	0.6	1	0.395259	0.97144	418300	0.0243025	2.5	0.984771	1.00002	0.988148	0.000261545	0.000185207	0.000260491	00:00:00	508006	00:00:00			3.35927e+08	2023-03-09
2023-03-10	1.69292e+07	0			0.4	452.4	1070.24	2.0315e+08	74.7606	2.5		0	2023-03-10	0.604733		1	2.62648e-05	3.82303e-05	0	0	0.6	1	0.395267	0.97144	418600	0.0243025	2.5	0.984771	1.00002	0.988166	0.000261545	0.000185207	0.000260491	00:00:00	508008	00:00:00			3.35933e+08	2023-03-10
2023-03-11	1.69292e+07	0			0.4	450.864	1066.58	2.03151e+08	74.5078	2.5		0	2023-03-11	0.604726		1	2.61569e-05	3.80991e-05	0	0	0.6	1	0.395274	0.97144	418900	0.0243025	2.5	0.984771	1.00002	0.988185	0.000261545	0.000185207	0.000260491	00:00:00	508010	00:00:00			3.35939e+08	2023-03-11
2023-03-12	1.69293e+07	0			0.4	449.336	1062.94	2.03152e+08	74.2562	2.5		0	2023-03-12	0.604719		1	2.60496e-05	3.79685e-05	0	0	0.6	1	0.395281	0.97144	419200	0.0243025	2.5	0.984771	1.00002	0.988203	0.000261545	0.000185207	0.000260491	00:00:00	508012	00:00:00			3.35944e+08	2023-03-12
2023-03-13	1.69294e+07	0			0.4	447.815	1059.32	2.03153e+08	74.0059	2.5		0	2023-03-13	0.604712		1	2.59429e-05	3.78386e-05	0	0	0.6	1	0.395288	0.97144	419500	0.0243025	2.5	0.984771	1.00002	0.988221	0.000261545	0.000185207	0.000260491	00:00:00	508013	00:00:00			3.3595e+08	2023-03-13
2023-03-14	1.69295e+07	0			0.4	446.302	1055.72	2.03153e+08	73.7567	2.5		0	2023-03-14	0.604704		1	2.58367e-05	3.77093e-05	0	0	0.6	1	0.395296	0.97144	419800	0.0243025	2.5	0.984771	1.00002	0.988239	0.000261545	0.000185207	0.000260491	00:00:00	508015	00:00:00			3.35955e+08	2023-03-14
2023-03-15	1.69295e+07	0			0.4	444.796	1052.13	2.03154e+08	73.5089	2.5		0	2023-03-15	0.604697		1	2.57312e-05	3.75806e-05	0	0	0.6	1	0.395303	0.97144	420100	0.0243025	2.5	0.984771	1.00002	0.988258	0.000261545	0.000185207	0.000260491	00:00:00	508017	00:00:00			3.35961e+08	2023-03-15
2023-03-16	1.69296e+07	0			0.4	443.298	1048.57	2.03155e+08	73.2622	2.5		0	2023-03-16	0.60469		1	2.56262e-05	3.74526e-05	0	0	0.6	1	0.39531	0.97144	420400	0.0243025	2.5	0.984771	1.00002	0.988276	0.000261545	0.000185207	0.000260491	00:00:00	508019	00:00:00			3.35966e+08	2023-03-16
2023-03-17	1.69297e+07	0			0.4	441.807	1045.02	2.03156e+08	73.0167	2.5		0	2023-03-17	0.604682		1	2.55218e-05	3.73253e-05	0	0	0.6	1	0.395318	0.97144	420700	0.0243025	2.5	0.984771	1.00002	0.988294	0.000261545	0.000185207	0.000260491	00:00:00	508021	00:00:00			3.35972e+08	2023-03-17
2023-03-18	1.69297e+07	0			0.4	440.323	1041.49	2.03157e+08	72.7725	2.5		0	2023-03-18	0.604675		1	2.54179e-05	3.71985e-05	0	0	0.6	1	0.395325	0.97144	421000	0.0243025	2.5	0.984771	1.00002	0.988313	0.000261545	0.000185207	0.000260491	00:00:00	508023	00:00:00			3.35977e+08	2023-03-18
2023-03-19	1.69298e+07	0			0.4	438.846	1037.97	2.03158e+08	72.5294	2.5		0	2023-03-19	0.604668		1	2.53147e-05	3.70724e-05	0	0	0.6	1	0.395332	0.97144	421300	0.0243025	2.5	0.984771	1.00002	0.988331	0.000261545	0.000185207	0.000260491	00:00:00	508025	00:00:00			3.35983e+08	2023-03-19
2023-03-20	1.69299e+07	0			0.4	437.377	1034.48	2.03159e+08	72.2876	2.5		0	2023-03-20	0.60466		1	2.5212e-05	3.69469e-05	0	0	0.6	1	0.39534	0.97144	421600	0.0243025	2.5	0.984771	1.00002	0.988349	0.000261545	0.000185207	0.000260491	00:00:00	508026	00:00:00			3.35988e+08	2023-03-20
2023-03-21	1.693e+07	0			0.4	435.915	1031	2.0316e+08	72.0469	2.5		0	2023-03-21	0.604653		1	2.51098e-05	3.6822e-05	0	0	0.6	1	0.395347	0.97144	421900	0.0243025	2.5	0.984771	1.00002	0.988368	0.000261545	0.000185207	0.000260491	00:00:00	508028	00:00:00			3.35994e+08	2023-03-21
2023-03-22	1.693e+07	0			0.4	434.461	1027.53	2.0316e+08	71.8075	2.5		0	2023-03-22	0.604646		1	2.50082e-05	3.66977e-05	0	0	0.6	1	0.395354	0.97144	422200	0.0243025	2.5	0.984771	1.00002	0.988386	0.000261545	0.000185207	0.000260491	00:00:00	508030	00:00:00			3.35999e+08	2023-03-22
2023-03-23	1.69301e+07	0			0.4	433.013	1024.09	2.03161e+08	71.5692	2.5		0	2023-03-23	0.604638		1	2.49072e-05	3.65741e-05	0	0	0.6	1	0.395362	0.97144	422500	0.0243025	2.5	0.984771	1.00002	0.988405	0.000261545	0.000185207	0.000260491	00:00:00	508032	00:00:00			3.36005e+08	2023-03-23
2023-03-24	1.69302e+07	0			0.4	431.573	1020.66	2.03162e+08	71.332	2.5		0	2023-03-24	0.604631		1	2.48067e-05	3.6451e-05	0	0	0.6	1	0.395369	0.97144	422800	0.0243025	2.5	0.984771	1.00002	0.988423	0.000261545	0.000185207	0.000260491	00:00:00	508034	00:00:00			3.3601e+08	2023-03-24
2023-03-25	1.69303e+07	0			0.4	430.139	1017.25	2.03163e+08	71.0961	2.5		0	2023-03-25	0.604623		1	2.47068e-05	3.63286e-05	0	0	0.6	1	0.395377	0.97144	423100	0.0243025	2.5	0.984771	1.00002	0.988442	0.000261545	0.000185207	0.000260491	00:00:00	508036	00:00:00			3.36016e+08	2023-03-25
2023-03-26	1.69303e+07	0			0.4	428.713	1013.85	2.03164e+08	70.8613	2.5		0	2023-03-26	0.604616		1	2.46074e-05	3.62067e-05	0	0	0.6	1	0.395384	0.97144	423400	0.0243025	2.5	0.984771	1.00002	0.98846	0.000261545	0.000185207	0.000260491	00:00:00	508037	00:00:00			3.36021e+08	2023-03-26
2023-03-27	1.69304e+07	0			0.4	427.294	1010.47	2.03165e+08	70.6276	2.5		0	2023-03-27	0.604609		1	2.45086e-05	3.60855e-05	0	0	0.6	1	0.395391	0.97144	423700	0.0243025	2.5	0.984771	1.00002	0.988479	0.000261545	0.000185207	0.000260491	00:00:00	508039	00:00:00			3.36027e+08	2023-03-27
2023-03-28	1.69305e+07	0			0.4	425.881	1007.11	2.03166e+08	70.3951	2.5		0	2023-03-28	0.604601		1	2.44103e-05	3.59648e-05	0	0	0.6	1	0.395399	0.97144	424000	0.0243025	2.5	0.984771	1.00002	0.988497	0.000261545	0.000185207	0.000260491	00:00:00	508041	00:00:00			3.36032e+08	2023-03-28
2023-03-29	1.69305e+07	0			0.4	424.476	1003.77	2.03166e+08	70.1637	2.5		0	2023-03-29	0.604594		1	2.43126e-05	3.58448e-05	0	0	0.6	1	0.395406	0.97144	424300	0.0243025	2.5	0.984771	1.00002	0.988516	0.000261545	0.000185207	0.000260491	00:00:00	508043	00:00:00			3.36038e+08	2023-03-29
2023-03-30	1.69306e+07	0			0.4	423.077	1000.44	2.03167e+08	69.9335	2.5		0	2023-03-30	0.604586		1	2.42153e-05	3.57253e-05	0	0	0.6	1	0.395414	0.97144	424600	0.0243025	2.5	0.984771	1.00002	0.988534	0.000261545	0.000185207	0.000260491	00:00:00	508045	00:00:00			3.36043e+08	2023-03-30
2023-03-31	1.69307e+07	0			0.4	421.686	997.127	2.03168e+08	69.7044	2.5		0	2023-03-31	0.604579		1	2.41186e-05	3.56065e-05	0	0	0.6	1	0.395421	0.97144	424900	0.0243025	2.5	0.984771	1.00002	0.988553	0.000261545	0.000185207	0.000260491	00:00:00	508046	00:00:00			3.36049e+08	2023-03-31
2023-04-01	1.69307e+07	0			0.4	420.301	993.831	2.03169e+08	69.4764	2.5		0	2023-04-01	0.604571		1	2.40225e-05	3.54882e-05	0	0	0.6	1	0.395429	0.97144	425200	0.0243025	2.5	0.984771	1.00002	0.988572	0.000261545	0.000185207	0.000260491	00:00:00	508048	00:00:00			3.36054e+08	2023-04-01
2023-04-02	1.69308e+07	0			0.4	418.923	990.551	2.0317e+08	69.2496	2.5		0	2023-04-02	0.604564		1	2.39268e-05	3.53705e-05	0	0	0.6	1	0.395436	0.97144	425500	0.0243025	2.5	0.984771	1.00002	0.98859	0.000261545	0.000185207	0.000260491	00:00:00	508050	00:00:00			3.3606e+08	2023-04-02
2023-04-03	1.69309e+07	0			0.4	417.551	987.287	2.03171e+08	69.0238	2.5		0	2023-04-03	0.604556		1	2.38317e-05	3.52534e-05	0	0	0.6	1	0.395444	0.97144	425800	0.0243025	2.5	0.984771	1.00002	0.988609	0.000261545	0.000185207	0.000260491	00:00:00	508052	00:00:00			3.36066e+08	2023-04-03
2023-04-04	1.69309e+07	0			0.4	416.187	984.039	2.03171e+08	68.7992	2.5		0	2023-04-04	0.604549		1	2.37371e-05	3.51368e-05	0	0	0.6	1	0.395451	0.97144	426100	0.0243025	2.5	0.984771	1.00002	0.988628	0.000261545	0.000185207	0.000260491	00:00:00	508053	00:00:00			3.36071e+08	2023-04-04
2023-04-05	1.6931e+07	0			0.4	414.829	980.808	2.03172e+08	68.5757	2.5		0	2023-04-05	0.604541		1	2.3643e-05	3.50209e-05	0	0	0.6	1	0.395459	0.97144	426400	0.0243025	2.5	0.984771	1.00002	0.988647	0.000261545	0.000185207	0.000260491	00:00:00	508055	00:00:00			3.36077e+08	2023-04-05
2023-04-06	1.69311e+07	0			0.4	413.478	977.592	2.03173e+08	68.3532	2.5		0	2023-04-06	0.604534		1	2.35494e-05	3.49055e-05	0	0	0.6	1	0.395466	0.97144	426700	0.0243025	2.5	0.984771	1.00002	0.988665	0.000261545	0.000185207	0.000260491	00:00:00	508057	00:00:00			3.36082e+08	2023-04-06
2023-04-07	1.69312e+07	0			0.4	412.133	974.391	2.03174e+08	68.1319	2.5		0	2023-04-07	0.604526		1	2.34564e-05	3.47906e-05	0	0	0.6	1	0.395474	0.97144	427000	0.0243025	2.5	0.984771	1.00002	0.988684	0.000261545	0.000185207	0.000260491	00:00:00	508059	00:00:00			3.36088e+08	2023-04-07
2023-04-08	1.69312e+07	0			0.4	410.795	971.207	2.03175e+08	67.9116	2.5		0	2023-04-08	0.604519		1	2.33638e-05	3.46764e-05	0	0	0.6	1	0.395481	0.97144	427300	0.0243025	2.5	0.984771	1.00002	0.988703	0.000261545	0.000185207	0.000260491	00:00:00	508060	00:00:00			3.36093e+08	2023-04-08
2023-04-09	1.69313e+07	0			0.4	409.464	968.038	2.03175e+08	67.6924	2.5		0	2023-04-09	0.604511		1	2.32717e-05	3.45626e-05	0	0	0.6	1	0.395489	0.97144	427600	0.0243025	2.5	0.984771	1.00002	0.988722	0.000261545	0.000185207	0.000260491	00:00:00	508062	00:00:00			3.36099e+08	2023-04-09
2023-04-10	1.69314e+07	0			0.4	408.139	964.885	2.03176e+08	67.4743	2.5		0	2023-04-10	0.604504		1	2.31802e-05	3.44495e-05	0	0	0.6	1	0.395496	0.97144	427900	0.0243025	2.5	0.984771	1.00002	0.98874	0.000261545	0.000185207	0.000260491	00:00:00	508064	00:00:00			3.36104e+08	2023-04-10
2023-04-11	1.69314e+07	0			0.4	406.821	961.747	2.03177e+08	67.2573	2.5		0	2023-04-11	0.604496		1	2.30891e-05	3.43369e-05	0	0	0.6	1	0.395504	0.97144	428200	0.0243025	2.5	0.984771	1.00002	0.988759	0.000261545	0.000185207	0.000260491	00:00:00	508066	00:00:00			3.3611e+08	2023-04-11
2023-04-12	1.69315e+07	0			0.4	405.509	958.625	2.03178e+08	67.0413	2.5		0	2023-04-12	0.604489		1	2.29985e-05	3.42249e-05	0	0	0.6	1	0.395511	0.97144	428500	0.0243025	2.5	0.984771	1.00002	0.988778	0.000261545	0.000185207	0.000260491	00:00:00	508067	00:00:00			3.36115e+08	2023-04-12
2023-04-13	1.69316e+07	0			0.4	404.203	955.518	2.03179e+08	66.8264	2.5		0	2023-04-13	0.604481		1	2.29085e-05	3.41134e-05	0	0	0.6	1	0.395519	0.97144	428800	0.0243025	2.5	0.984771	1.00002	0.988797	0.000261545	0.000185207	0.000260491	00:00:00	508069	00:00:00			3.36121e+08	2023-04-13
2023-04-14	1.69316e+07	0			0.4	402.904	952.426	2.03179e+08	66.6125	2.5		0	2023-04-14	0.604474		1	2.28189e-05	3.40024e-05	0	0	0.6	1	0.395526	0.97144	429100	0.0243025	2.5	0.984771	1.00002	0.988816	0.000261545	0.000185207	0.000260491	00:00:00	508071	00:00:00			3.36126e+08	2023-04-14
2023-04-15	1.69317e+07	0			0.4	401.611	949.349	2.0318e+08	66.3997	2.5		0	2023-04-15	0.604466		1	2.27298e-05	3.3892e-05	0	0	0.6	1	0.395534	0.97144	429400	0.0243025	2.5	0.984771	1.00002	0.988835	0.000261545	0.000185207	0.000260491	00:00:00	508072	00:00:00			3.36132e+08	2023-04-15
2023-04-16	1.69318e+07	0			0.4	400.325	946.287	2.03181e+08	66.1879	2.5		0	2023-04-16	0.604459		1	2.26411e-05	3.37822e-05	0	0	0.6	1	0.395541	0.97144	429700	0.0243025	2.5	0.984771	1.00002	0.988854	0.000261545	0.000185207	0.000260491	00:00:00	508074	00:00:00			3.36137e+08	2023-04-16
2023-04-17	1.69318e+07	0			0.4	399.045	943.241	2.03182e+08	65.9771	2.5		0	2023-04-17	0.604451		1	2.2553e-05	3.36728e-05	0	0	0.6	1	0.395549	0.97144	430000	0.0243025	2.5	0.984771	1.00002	0.988873	0.000261545	0.000185207	0.000260491	00:00:00	508076	00:00:00			3.36143e+08	2023-04-17
2023-04-18	1.69319e+07	0			0.4	397.771	940.209	2.03183e+08	65.7674	2.5		0	2023-04-18	0.604443		1	2.24653e-05	3.35641e-05	0	0	0.6	1	0.395557	0.97144	430300	0.0243025	2.5	0.984771	1.00002	0.988892	0.000261545	0.000185207	0.000260491	00:00:00	508077	00:00:00			3.36148e+08	2023-04-18
2023-04-19	1.6932e+07	0			0.4	396.503	937.192	2.03183e+08	65.5587	2.5		0	2023-04-19	0.604436		1	2.23781e-05	3.34558e-05	0	0	0.6	1	0.395564	0.97144	430600	0.0243025	2.5	0.984771	1.00002	0.988911	0.000261545	0.000185207	0.000260491	00:00:00	508079	00:00:00			3.36154e+08	2023-04-19
2023-04-20	1.6932e+07	0			0.4	395.242	934.19	2.03184e+08	65.3511	2.5		0	2023-04-20	0.604428		1	2.22914e-05	3.33481e-05	0	0	0.6	1	0.395572	0.97144	430900	0.0243025	2.5	0.984771	1.00002	0.98893	0.000261545	0.000185207	0.000260491	00:00:00	508081	00:00:00			3.36159e+08	2023-04-20
2023-04-21	1.69321e+07	0			0.4	393.987	931.202	2.03185e+08	65.1444	2.5		0	2023-04-21	0.604421		1	2.22052e-05	3.32409e-05	0	0	0.6	1	0.395579	0.97144	431200	0.0243025	2.5	0.984771	1.00002	0.988949	0.000261545	0.000185207	0.000260491	00:00:00	508082	00:00:00			3.36165e+08	2023-04-21
2023-04-22	1.69322e+07	0			0.4	392.738	928.229	2.03186e+08	64.9388	2.5		0	2023-04-22	0.604413		1	2.21194e-05	3.31342e-05	0	0	0.6	1	0.395587	0.97144	431500	0.0243025	2.5	0.984771	1.00002	0.988968	0.000261545	0.000185207	0.000260491	00:00:00	508084	00:00:00			3.36171e+08	2023-04-22
2023-04-23	1.69322e+07	0			0.4	391.495	925.271	2.03187e+08	64.7341	2.5		0	2023-04-23	0.604405		1	2.2034e-05	3.30281e-05	0	0	0.6	1	0.395595	0.97144	431800	0.0243025	2.5	0.984771	1.00002	0.988987	0.000261545	0.000185207	0.000260491	00:00:00	508086	00:00:00			3.36176e+08	2023-04-23
2023-04-24	1.69323e+07	0			0.4	390.258	922.327	2.03187e+08	64.5305	2.5		0	2023-04-24	0.604398		1	2.19492e-05	3.29225e-05	0	0	0.6	1	0.395602	0.97144	432100	0.0243025	2.5	0.984771	1.00002	0.989006	0.000261545	0.000185207	0.000260491	00:00:00	508087	00:00:00			3.36182e+08	2023-04-24
2023-04-25	1.69323e+07	0			0.4	389.027	919.398	2.03188e+08	64.3278	2.5		0	2023-04-25	0.60439		1	2.18648e-05	3.28174e-05	0	0	0.6	1	0.39561	0.97144	432400	0.0243025	2.5	0.984771	1.00002	0.989025	0.000261545	0.000185207	0.000260491	00:00:00	508089	00:00:00			3.36187e+08	2023-04-25
2023-04-26	1.69324e+07	0			0.4	387.802	916.483	2.03189e+08	64.1262	2.5		0	2023-04-26	0.604382		1	2.17808e-05	3.27128e-05	0	0	0.6	1	0.395618	0.97144	432700	0.0243025	2.5	0.984771	1.00002	0.989044	0.000261545	0.000185207	0.000260491	00:00:00	508091	00:00:00			3.36193e+08	2023-04-26
2023-04-27	1.69325e+07	0			0.4	386.583	913.582	2.0319e+08	63.9255	2.5		0	2023-04-27	0.604375		1	2.16973e-05	3.26087e-05	0	0	0.6	1	0.395625	0.97144	433000	0.0243025	2.5	0.984771	1.00002	0.989063	0.000261545	0.000185207	0.000260491	00:00:00	508092	00:00:00			3.36198e+08	2023-04-27
2023-04-28	1.69325e+07	0			0.4	385.37	910.695	2.0319e+08	63.7258	2.5		0	2023-04-28	0.604367		1	2.16142e-05	3.25051e-05	0	0	0.6	1	0.395633	0.97144	433300	0.0243025	2.5	0.984771	1.00002	0.989082	0.000261545	0.000185207	0.000260491	00:00:00	508094	00:00:00			3.36204e+08	2023-04-28
2023-04-29	1.69326e+07	0			0.4	384.163	907.823	2.03191e+08	63.5271	2.5		0	2023-04-29	0.604359		1	2.15316e-05	3.24021e-05	0	0	0.6	1	0.395641	0.97144	433600	0.0243025	2.5	0.984771	1.00002	0.989102	0.000261545	0.000185207	0.000260491	00:00:00	508096	00:00:00			3.36209e+08	2023-04-29
2023-04-30	1.69327e+07	0			0.4	382.962	904.964	2.03192e+08	63.3294	2.5		0	2023-04-30	0.604352		1	2.14495e-05	3.22995e-05	0	0	0.6	1	0.395648	0.97144	433900	0.0243025	2.5	0.984771	1.00002	0.989121	0.000261545	0.000185207	0.000260491	00:00:00	508097	00:00:00			3.36215e+08	2023-04-30
2023-05-01	1.69327e+07	0			0.4	381.767	902.12	2.03193e+08	63.1326	2.5		0	2023-05-01	0.604344		1	2.13678e-05	3.21974e-05	0	0	0.6	1	0.395656	0.97144	434200	0.0243025	2.5	0.984771	1.00002	0.98914	0.000261545	0.000185207	0.000260491	00:00:00	508099	00:00:00			3.3622e+08	2023-05-01
2023-05-02	1.69328e+07	0			0.4	380.577	899.289	2.03193e+08	62.9368	2.5		0	2023-05-02	0.604336		1	2.12865e-05	3.20959e-05	0	0	0.6	1	0.395664	0.97144	434500	0.0243025	2.5	0.984771	1.00002	0.989159	0.000261545	0.000185207	0.000260491	00:00:00	508100	00:00:00			3.36226e+08	2023-05-02
2023-05-03	1.69329e+07	0			0.4	379.394	896.472	2.03194e+08	62.7419	2.5		0	2023-05-03	0.604329		1	2.12056e-05	3.19948e-05	0	0	0.6	1	0.395671	0.97144	434800	0.0243025	2.5	0.984771	1.00002	0.989178	0.000261545	0.000185207	0.000260491	00:00:00	508102	00:00:00			3.36231e+08	2023-05-03
2023-05-04	1.69329e+07	0			0.4	378.216	893.669	2.03195e+08	62.548	2.5		0	2023-05-04	0.604321		1	2.11252e-05	3.18943e-05	0	0	0.6	1	0.395679	0.97144	435100	0.0243025	2.5	0.984771	1.00002	0.989198	0.000261545	0.000185207	0.000260491	00:00:00	508104	00:00:00			3.36237e+08	2023-05-04
2023-05-05	1.6933e+07	0			0.4	377.044	890.88	2.03196e+08	62.355	2.5		0	2023-05-05	0.604313		1	2.10453e-05	3.17942e-05	0	0	0.6	1	0.395687	0.97144	435400	0.0243025	2.5	0.984771	1.00002	0.989217	0.000261545	0.000185207	0.000260491	00:00:00	508105	00:00:00			3.36242e+08	2023-05-05
2023-05-06	1.6933e+07	0			0.4	375.877	888.104	2.03196e+08	62.163	2.5		0	2023-05-06	0.604306		1	2.09657e-05	3.16946e-05	0	0	0.6	1	0.395694	0.97144	435700	0.0243025	2.5	0.984771	1.00002	0.989236	0.000261545	0.000185207	0.000260491	00:00:00	508107	00:00:00			3.36248e+08	2023-05-06
2023-05-07	1.69331e+07	0			0.4	374.717	885.342	2.03197e+08	61.9719	2.5		0	2023-05-07	0.604298		1	2.08866e-05	3.15955e-05	0	0	0.6	1	0.395702	0.97144	436000	0.0243025	2.5	0.984771	1.00002	0.989255	0.000261545	0.000185207	0.000260491	00:00:00	508108	00:00:00			3.36253e+08	2023-05-07
2023-05-08	1.69332e+07	0			0.4	373.562	882.593	2.03198e+08	61.7817	2.5		0	2023-05-08	0.60429		1	2.08079e-05	3.14969e-05	0	0	0.6	1	0.39571	0.97144	436300	0.0243025	2.5	0.984771	1.00002	0.989275	0.000261545	0.000185207	0.000260491	00:00:00	508110	00:00:00			3.36259e+08	2023-05-08
2023-05-09	1.69332e+07	0			0.4	372.412	879.857	2.03199e+08	61.5925	2.5		0	2023-05-09	0.604282		1	2.07296e-05	3.13988e-05	0	0	0.6	1	0.395718	0.97144	436600	0.0243025	2.5	0.984771	1.00002	0.989294	0.000261545	0.000185207	0.000260491	00:00:00	508111	00:00:00			3.36264e+08	2023-05-09
2023-05-10	1.69333e+07	0			0.4	371.268	877.135	2.03199e+08	61.4042	2.5		0	2023-05-10	0.604275		1	2.06517e-05	3.13011e-05	0	0	0.6	1	0.395725	0.97144	436900	0.0243025	2.5	0.984771	1.00002	0.989314	0.000261545	0.000185207	0.000260491	00:00:00	508113	00:00:00			3.3627e+08	2023-05-10
2023-05-11	1.69333e+07	0			0.4	370.13	874.427	2.032e+08	61.2168	2.5		0	2023-05-11	0.604267		1	2.05743e-05	3.12039e-05	0	0	0.6	1	0.395733	0.97144	437200	0.0243025	2.5	0.984771	1.00002	0.989333	0.000261545	0.000185207	0.000260491	00:00:00	508115	00:00:00			3.36276e+08	2023-05-11
2023-05-12	1.69334e+07	0			0.4	368.997	871.731	2.03201e+08	61.0303	2.5		0	2023-05-12	0.604259		1	2.04973e-05	3.11072e-05	0	0	0.6	1	0.395741	0.97144	437500	0.0243025	2.5	0.984771	1.00002	0.989352	0.000261545	0.000185207	0.000260491	00:00:00	508116	00:00:00			3.36281e+08	2023-05-12
2023-05-13	1.69335e+07	0			0.4	367.87	869.049	2.03202e+08	60.8447	2.5		0	2023-05-13	0.604251		1	2.04207e-05	3.1011e-05	0	0	0.6	1	0.395749	0.97144	437800	0.0243025	2.5	0.984771	1.00002	0.989372	0.000261545	0.000185207	0.000260491	00:00:00	508118	00:00:00			3.36287e+08	2023-05-13
2023-05-14	1.69335e+07	0			0.4	366.749	866.38	2.03202e+08	60.6601	2.5		0	2023-05-14	0.604244		1	2.03445e-05	3.09152e-05	0	0	0.6	1	0.395756	0.97144	438100	0.0243025	2.5	0.984771	1.00002	0.989391	0.000261545	0.000185207	0.000260491	00:00:00	508119	00:00:00			3.36292e+08	2023-05-14
2023-05-15	1.69336e+07	0			0.4	365.632	863.723	2.03203e+08	60.4763	2.5		0	2023-05-15	0.604236		1	2.02687e-05	3.082e-05	0	0	0.6	1	0.395764	0.97144	438400	0.0243025	2.5	0.984771	1.00002	0.989411	0.000261545	0.000185207	0.000260491	00:00:00	508121	00:00:00			3.36298e+08	2023-05-15
2023-05-16	1.69336e+07	0			0.4	364.522	861.08	2.03204e+08	60.2934	2.5		0	2023-05-16	0.604228		1	2.01933e-05	3.07251e-05	0	0	0.6	1	0.395772	0.97144	438700	0.0243025	2.5	0.984771	1.00002	0.98943	0.000261545	0.000185207	0.000260491	00:00:00	508122	00:00:00			3.36303e+08	2023-05-16
2023-05-17	1.69337e+07	0			0.4	363.416	858.449	2.03205e+08	60.1114	2.5		0	2023-05-17	0.60422		1	2.01183e-05	3.06308e-05	0	0	0.6	1	0.39578	0.97144	439000	0.0243025	2.5	0.984771	1.00002	0.989449	0.000261545	0.000185207	0.000260491	00:00:00	508124	00:00:00			3.36309e+08	2023-05-17
2023-05-18	1.69338e+07	0			0.4	362.316	855.832	2.03205e+08	59.9303	2.5		0	2023-05-18	0.604212		1	2.00437e-05	3.05369e-05	0	0	0.6	1	0.395788	0.97144	439300	0.0243025	2.5	0.984771	1.00002	0.989469	0.000261545	0.000185207	0.000260491	00:00:00	508125	00:00:00			3.36314e+08	2023-05-18
2023-05-19	1.69338e+07	0			0.4	361.222	853.227	2.03206e+08	59.7501	2.5		0	2023-05-19	0.604205		1	1.99695e-05	3.04434e-05	0	0	0.6	1	0.395795	0.97144	439600	0.0243025	2.5	0.984771	1.00002	0.989488	0.000261545	0.000185207	0.000260491	00:00:00	508127	00:00:00			3.3632e+08	2023-05-19
2023-05-20	1.69339e+07	0			0.4	360.132	850.635	2.03207e+08	59.5708	2.5		0	2023-05-20	0.604197		1	1.98957e-05	3.03504e-05	0	0	0.6	1	0.395803	0.97144	439900	0.0243025	2.5	0.984771	1.00002	0.989508	0.000261545	0.000185207	0.000260491	00:00:00	508128	00:00:00			3.36325e+08	2023-05-20
2023-05-21	1.69339e+07	0			0.4	359.048	848.055	2.03207e+08	59.3923	2.5		0	2023-05-21	0.604189		1	1.98223e-05	3.02579e-05	0	0	0.6	1	0.395811	0.97144	440200	0.0243025	2.5	0.984771	1.00002	0.989527	0.000261545	0.000185207	0.000260491	00:00:00	508130	00:00:00			3.36331e+08	2023-05-21
2023-05-22	1.6934e+07	0			0.4	357.97	845.488	2.03208e+08	59.2147	2.5		0	2023-05-22	0.604181		1	1.97493e-05	3.01658e-05	0	0	0.6	1	0.395819	0.97144	440500	0.0243025	2.5	0.984771	1.00002	0.989547	0.000261545	0.000185207	0.000260491	00:00:00	508131	00:00:00			3.36336e+08	2023-05-22
2023-05-23	1.69341e+07	0			0.4	356.896	842.934	2.03209e+08	59.038	2.5		0	2023-05-23	0.604173		1	1.96767e-05	3.00742e-05	0	0	0.6	1	0.395827	0.97144	440800	0.0243025	2.5	0.984771	1.00002	0.989567	0.000261545	0.000185207	0.000260491	00:00:00	508133	00:00:00			3.36342e+08	2023-05-23
2023-05-24	1.69341e+07	0			0.4	355.828	840.391	2.0321e+08	58.8621	2.5		0	2023-05-24	0.604166		1	1.96044e-05	2.9983e-05	0	0	0.6	1	0.395834	0.97144	441100	0.0243025	2.5	0.984771	1.00002	0.989586	0.000261545	0.000185207	0.000260491	00:00:00	508134	00:00:00			3.36347e+08	2023-05-24
2023-05-25	1.69342e+07	0			0.4	354.765	837.862	2.0321e+08	58.6871	2.5		0	2023-05-25	0.604158		1	1.95326e-05	2.98922e-05	0	0	0.6	1	0.395842	0.97144	441400	0.0243025	2.5	0.984771	1.00002	0.989606	0.000261545	0.000185207	0.000260491	00:00:00	508136	00:00:00			3.36353e+08	2023-05-25
2023-05-26	1.69342e+07	0			0.4	353.707	835.344	2.03211e+08	58.5129	2.5		0	2023-05-26	0.60415		1	1.94611e-05	2.98019e-05	0	0	0.6	1	0.39585	0.97144	441700	0.0243025	2.5	0.984771	1.00002	0.989625	0.000261545	0.000185207	0.000260491	00:00:00	508137	00:00:00			3.36358e+08	2023-05-26
2023-05-27	1.69343e+07	0			0.4	352.654	832.839	2.03212e+08	58.3396	2.5		0	2023-05-27	0.604142		1	1.939e-05	2.97121e-05	0	0	0.6	1	0.395858	0.97144	442000	0.0243025	2.5	0.984771	1.00002	0.989645	0.000261545	0.000185207	0.000260491	00:00:00	508139	00:00:00			3.36364e+08	2023-05-27
2023-05-28	1.69344e+07	0			0.4	351.607	830.346	2.03212e+08	58.1671	2.5		0	2023-05-28	0.604134		1	1.93193e-05	2.96226e-05	0	0	0.6	1	0.395866	0.97144	442300	0.0243025	2.5	0.984771	1.00002	0.989665	0.000261545	0.000185207	0.000260491	00:00:00	508140	00:00:00			3.3637e+08	2023-05-28
2023-05-29	1.69344e+07	0			0.4	350.564	827.865	2.03213e+08	57.9955	2.5		0	2023-05-29	0.604126		1	1.9249e-05	2.95337e-05	0	0	0.6	1	0.395874	0.97144	442600	0.0243025	2.5	0.984771	1.00002	0.989684	0.000261545	0.000185207	0.000260491	00:00:00	508142	00:00:00			3.36375e+08	2023-05-29
2023-05-30	1.69345e+07	0			0.4	349.527	825.397	2.03214e+08	57.8247	2.5		0	2023-05-30	0.604118		1	1.9179e-05	2.94451e-05	0	0	0.6	1	0.395882	0.97144	442900	0.0243025	2.5	0.984771	1.00002	0.989704	0.000261545	0.000185207	0.000260491	00:00:00	508143	00:00:00			3.36381e+08	2023-05-30
2023-05-31	1.69345e+07	0			0.4	348.494	822.94	2.03214e+08	57.6547	2.5		0	2023-05-31	0.604111		1	1.91094e-05	2.9357e-05	0	0	0.6	1	0.395889	0.97144	443200	0.0243025	2.5	0.984771	1.00002	0.989724	0.000261545	0.000185207	0.000260491	00:00:00	508145	00:00:00			3.36386e+08	2023-05-31
2023-06-01	1.69346e+07	0			0.4	347.467	820.495	2.03215e+08	57.4855	2.5		0	2023-06-01	0.604103		1	1.90402e-05	2.92693e-05	0	0	0.6	1	0.395897	0.97144	443500	0.0243025	2.5	0.984771	1.00002	0.989743	0.000261545	0.000185207	0.000260491	00:00:00	508146	00:00:00			3.36392e+08	2023-06-01
2023-06-02	1.69346e+07	0			0.4	346.445	818.062	2.03216e+08	57.3172	2.5		0	2023-06-02	0.604095		1	1.89713e-05	2.9182e-05	0	0	0.6	1	0.395905	0.97144	443800	0.0243025	2.5	0.984771	1.00002	0.989763	0.000261545	0.000185207	0.000260491	00:00:00	508148	00:00:00			3.36397e+08	2023-06-02
2023-06-03	1.69347e+07	0			0.4	345.427	815.641	2.03216e+08	57.1497	2.5		0	2023-06-03	0.604087		1	1.89028e-05	2.90952e-05	0	0	0.6	1	0.395913	0.97144	444100	0.0243025	2.5	0.984771	1.00002	0.989783	0.000261545	0.000185207	0.000260491	00:00:00	508149	00:00:00			3.36403e+08	2023-06-03
2023-06-04	1.69348e+07	0			0.4	344.415	813.232	2.03217e+08	56.983	2.5		0	2023-06-04	0.604079		1	1.88347e-05	2.90087e-05	0	0	0.6	1	0.395921	0.97144	444400	0.0243025	2.5	0.984771	1.00002	0.989803	0.000261545	0.000185207	0.000260491	00:00:00	508151	00:00:00			3.36408e+08	2023-06-04
2023-06-05	1.69348e+07	0			0.4	343.407	810.834	2.03218e+08	56.8171	2.5		0	2023-06-05	0.604071		1	1.87669e-05	2.89227e-05	0	0	0.6	1	0.395929	0.97144	444700	0.0243025	2.5	0.984771	1.00002	0.989822	0.000261545	0.000185207	0.000260491	00:00:00	508152	00:00:00			3.36414e+08	2023-06-05
2023-06-06	1.69349e+07	0			0.4	342.405	808.448	2.03218e+08	56.652	2.5		0	2023-06-06	0.604063		1	1.86995e-05	2.88372e-05	0	0	0.6	1	0.395937	0.97144	445000	0.0243025	2.5	0.984771	1.00002	0.989842	0.000261545	0.000185207	0.000260491	00:00:00	508154	00:00:00			3.36419e+08	2023-06-06
2023-06-07	1.69349e+07	0			0.4	341.407	806.074	2.03219e+08	56.4877	2.5		0	2023-06-07	0.604055		1	1.86325e-05	2.8752e-05	0	0	0.6	1	0.395945	0.97144	445300	0.0243025	2.5	0.984771	1.00002	0.989862	0.000261545	0.000185207	0.000260491	00:00:00	508155	00:00:00			3.36425e+08	2023-06-07
2023-06-08	1.6935e+07	0			0.4	340.414	803.711	2.0322e+08	56.3242	2.5		0	2023-06-08	0.604047		1	1.85658e-05	2.86672e-05	0	0	0.6	1	0.395953	0.97144	445600	0.0243025	2.5	0.984771	1.00002	0.989882	0.000261545	0.000185207	0.000260491	00:00:00	508156	00:00:00			3.3643e+08	2023-06-08
2023-06-09	1.6935e+07	0			0.4	339.426	801.36	2.03221e+08	56.1616	2.5		0	2023-06-09	0.604039		1	1.84994e-05	2.85829e-05	0	0	0.6	1	0.395961	0.97144	445900	0.0243025	2.5	0.984771	1.00002	0.989901	0.000261545	0.000185207	0.000260491	00:00:00	508158	00:00:00			3.36436e+08	2023-06-09
2023-06-10	1.69351e+07	0			0.4	338.442	799.02	2.03221e+08	55.9997	2.5		0	2023-06-10	0.604031		1	1.84334e-05	2.8499e-05	0	0	0.6	1	0.395969	0.97144	446200	0.0243025	2.5	0.984771	1.00002	0.989921	0.000261545	0.000185207	0.000260491	00:00:00	508159	00:00:00			3.36441e+08	2023-06-10
2023-06-11	1.69352e+07	0			0.4	337.464	796.691	2.03222e+08	55.8385	2.5		0	2023-06-11	0.604024		1	1.83678e-05	2.84155e-05	0	0	0.6	1	0.395976	0.97144	446500	0.0243025	2.5	0.984771	1.00002	0.989941	0.000261545	0.000185207	0.000260491	00:00:00	508161	00:00:00			3.36447e+08	2023-06-11
2023-06-12	1.69352e+07	0			0.4	336.49	794.374	2.03223e+08	55.6782	2.5		0	2023-06-12	0.604016		1	1.83025e-05	2.83323e-05	0	0	0.6	1	0.395984	0.97144	446800	0.0243025	2.5	0.984771	1.00002	0.989961	0.000261545	0.000185207	0.000260491	00:00:00	508162	00:00:00			3.36452e+08	2023-06-12
2023-06-13	1.69353e+07	0			0.4	335.521	792.068	2.03223e+08	55.5187	2.5		0	2023-06-13	0.604008		1	1.82375e-05	2.82496e-05	0	0	0.6	1	0.395992	0.97144	447100	0.0243025	2.5	0.984771	1.00002	0.989981	0.000261545	0.000185207	0.000260491	00:00:00	508164	00:00:00			3.36458e+08	2023-06-13
2023-06-14	1.69353e+07	0			0.4	334.556	789.773	2.03224e+08	55.3599	2.5		0	2023-06-14	0.604		1	1.81729e-05	2.81673e-05	0	0	0.6	1	0.396	0.97144	447400	0.0243025	2.5	0.984771	1.00002	0.990001	0.000261545	0.000185207	0.000260491	00:00:00	508165	00:00:00			3.36464e+08	2023-06-14
2023-06-15	1.69354e+07	0			0.4	333.597	787.489	2.03225e+08	55.2019	2.5		0	2023-06-15	0.603992		1	1.81086e-05	2.80854e-05	0	0	0.6	1	0.396008	0.97144	447700	0.0243025	2.5	0.984771	1.00002	0.990021	0.000261545	0.000185207	0.000260491	00:00:00	508166	00:00:00			3.36469e+08	2023-06-15
2023-06-16	1.69354e+07	0			0.4	332.642	785.217	2.03225e+08	55.0446	2.5		0	2023-06-16	0.603984		1	1.80447e-05	2.80039e-05	0	0	0.6	1	0.396016	0.97144	448000	0.0243025	2.5	0.984771	1.00002	0.990041	0.000261545	0.000185207	0.000260491	00:00:00	508168	00:00:00			3.36475e+08	2023-06-16
2023-06-17	1.69355e+07	0			0.4	331.691	782.955	2.03226e+08	54.8881	2.5		0	2023-06-17	0.603976		1	1.79811e-05	2.79228e-05	0	0	0.6	1	0.396024	0.97144	448300	0.0243025	2.5	0.984771	1.00002	0.990061	0.000261545	0.000185207	0.000260491	00:00:00	508169	00:00:00			3.3648e+08	2023-06-17
2023-06-18	1.69355e+07	0			0.4	330.746	780.705	2.03227e+08	54.7324	2.5		0	2023-06-18	0.603968		1	1.79178e-05	2.78421e-05	0	0	0.6	1	0.396032	0.97144	448600	0.0243025	2.5	0.984771	1.00002	0.99008	0.000261545	0.000185207	0.000260491	00:00:00	508171	00:00:00			3.36486e+08	2023-06-18
2023-06-19	1.69356e+07	0			0.4	329.804	778.465	2.03227e+08	54.5775	2.5		0	2023-06-19	0.60396		1	1.78549e-05	2.77617e-05	0	0	0.6	1	0.39604	0.97144	448900	0.0243025	2.5	0.984771	1.00002	0.9901	0.000261545	0.000185207	0.000260491	00:00:00	508172	00:00:00			3.36491e+08	2023-06-19
2023-06-20	1.69357e+07	0			0.4	328.868	776.236	2.03228e+08	54.4232	2.5		0	2023-06-20	0.603952		1	1.77923e-05	2.76818e-05	0	0	0.6	1	0.396048	0.97144	449200	0.0243025	2.5	0.984771	1.00002	0.99012	0.000261545	0.000185207	0.000260491	00:00:00	508173	00:00:00			3.36497e+08	2023-06-20
2023-06-21	1.69357e+07	0			0.4	327.936	774.018	2.03228e+08	54.2698	2.5		0	2023-06-21	0.603944		1	1.773e-05	2.76022e-05	0	0	0.6	1	0.396056	0.97144	449500	0.0243025	2.5	0.984771	1.00002	0.99014	0.000261545	0.000185207	0.000260491	00:00:00	508175	00:00:00			3.36502e+08	2023-06-21
2023-06-22	1.69358e+07	0			0.4	327.008	771.811	2.03229e+08	54.1171	2.5		0	2023-06-22	0.603936		1	1.76681e-05	2.75231e-05	0	0	0.6	1	0.396064	0.97144	449800	0.0243025	2.5	0.984771	1.00002	0.99016	0.000261545	0.000185207	0.000260491	00:00:00	508176	00:00:00			3.36508e+08	2023-06-22
2023-06-23	1.69358e+07	0			0.4	326.085	769.615	2.0323e+08	53.9651	2.5		0	2023-06-23	0.603928		1	1.76065e-05	2.74443e-05	0	0	0.6	1	0.396072	0.97144	450100	0.0243025	2.5	0.984771	1.00002	0.99018	0.000261545	0.000185207	0.000260491	00:00:00	508178	00:00:00			3.36513e+08	2023-06-23
2023-06-24	1.69359e+07	0			0.4	325.166	767.429	2.0323e+08	53.8138	2.5		0	2023-06-24	0.60392		1	1.75452e-05	2.73659e-05	0	0	0.6	1	0.39608	0.97144	450400	0.0243025	2.5	0.984771	1.00002	0.9902	0.000261545	0.000185207	0.000260491	00:00:00	508179	00:00:00			3.36519e+08	2023-06-24
2023-06-25	1.69359e+07	0			0.4	324.252	765.253	2.03231e+08	53.6633	2.5		0	2023-06-25	0.603912		1	1.74842e-05	2.72879e-05	0	0	0.6	1	0.396088	0.97144	450700	0.0243025	2.5	0.984771	1.00002	0.99022	0.000261545	0.000185207	0.000260491	00:00:00	508180	00:00:00			3.36524e+08	2023-06-25
2023-06-26	1.6936e+07	0			0.4	323.343	763.089	2.03232e+08	53.5135	2.5		0	2023-06-26	0.603904		1	1.74236e-05	2.72103e-05	0	0	0.6	1	0.396096	0.97144	451000	0.0243025	2.5	0.984771	1.00002	0.99024	0.000261545	0.000185207	0.000260491	00:00:00	508182	00:00:00			3.3653e+08	2023-06-26
2023-06-27	1.6936e+07	0			0.4	322.437	760.935	2.03232e+08	53.3645	2.5		0	2023-06-27	0.603896		1	1.73632e-05	2.7133e-05	0	0	0.6	1	0.396104	0.97144	451300	0.0243025	2.5	0.984771	1.00002	0.990261	0.000261545	0.000185207	0.000260491	00:00:00	508183	00:00:00			3.36535e+08	2023-06-27
2023-06-28	1.69361e+07	0			0.4	321.536	758.791	2.03233e+08	53.2162	2.5		0	2023-06-28	0.603888		1	1.73032e-05	2.70561e-05	0	0	0.6	1	0.396112	0.97144	451600	0.0243025	2.5	0.984771	1.00002	0.990281	0.000261545	0.000185207	0.000260491	00:00:00	508184	00:00:00			3.36541e+08	2023-06-28
2023-06-29	1.69361e+07	0			0.4	320.64	756.658	2.03234e+08	53.0685	2.5		0	2023-06-29	0.60388		1	1.72435e-05	2.69796e-05	0	0	0.6	1	0.39612	0.97144	451900	0.0243025	2.5	0.984771	1.00002	0.990301	0.000261545	0.000185207	0.000260491	00:00:00	508186	00:00:00			3.36547e+08	2023-06-29
2023-06-30	1.69362e+07	0			0.4	319.748	754.535	2.03234e+08	52.9216	2.5		0	2023-06-30	0.603872		1	1.71841e-05	2.69035e-05	0	0	0.6	1	0.396128	0.97144	452200	0.0243025	2.5	0.984771	1.00002	0.990321	0.000261545	0.000185207	0.000260491	00:00:00	508187	00:00:00			3.36552e+08	2023-06-30
2023-07-01	1.69362e+07	0			0.4	318.86	752.422	2.03235e+08	52.7755	2.5		0	2023-07-01	0.603864		1	1.71251e-05	2.68277e-05	0	0	0.6	1	0.396136	0.97144	452500	0.0243025	2.5	0.984771	1.00002	0.990341	0.000261545	0.000185207	0.000260491	00:00:00	508188	00:00:00			3.36558e+08	2023-07-01
2023-07-02	1.69363e+07	0			0.4	317.976	750.32	2.03236e+08	52.63	2.5		0	2023-07-02	0.603856		1	1.70663e-05	2.67523e-05	0	0	0.6	1	0.396144	0.97144	452800	0.0243025	2.5	0.984771	1.00002	0.990361	0.000261545	0.000185207	0.000260491	00:00:00	508190	00:00:00			3.36563e+08	2023-07-02
2023-07-03	1.69363e+07	0			0.4	317.097	748.227	2.03236e+08	52.4852	2.5		0	2023-07-03	0.603848		1	1.70078e-05	2.66773e-05	0	0	0.6	1	0.396152	0.97144	453100	0.0243025	2.5	0.984771	1.00002	0.990381	0.000261545	0.000185207	0.000260491	00:00:00	508191	00:00:00			3.36569e+08	2023-07-03
2023-07-04	1.69364e+07	0			0.4	316.222	746.145	2.03237e+08	52.3411	2.5		0	2023-07-04	0.603839		1	1.69497e-05	2.66026e-05	0	0	0.6	1	0.396161	0.97144	453400	0.0243025	2.5	0.984771	1.00002	0.990401	0.000261545	0.000185207	0.000260491	00:00:00	508192	00:00:00			3.36574e+08	2023-07-04
2023-07-05	1.69364e+07	0			0.4	315.351	744.073	2.03237e+08	52.1978	2.5		0	2023-07-05	0.603831		1	1.68918e-05	2.65283e-05	0	0	0.6	1	0.396169	0.97144	453700	0.0243025	2.5	0.984771	1.00002	0.990421	0.000261545	0.000185207	0.000260491	00:00:00	508194	00:00:00			3.3658e+08	2023-07-05
2023-07-06	1.69365e+07	0			0.4	314.485	742.011	2.03238e+08	52.0551	2.5		0	2023-07-06	0.603823		1	1.68343e-05	2.64543e-05	0	0	0.6	1	0.396177	0.97144	454000	0.0243025	2.5	0.984771	1.00002	0.990442	0.000261545	0.000185207	0.000260491	00:00:00	508195	00:00:00			3.36585e+08	2023-07-06
2023-07-07	1.69366e+07	0			0.4	313.622	739.959	2.03239e+08	51.9131	2.5		0	2023-07-07	0.603815		1	1.6777e-05	2.63807e-05	0	0	0.6	1	0.396185	0.97144	454300	0.0243025	2.5	0.984771	1.00002	0.990462	0.000261545	0.000185207	0.000260491	00:00:00	508196	00:00:00			3.36591e+08	2023-07-07
2023-07-08	1.69366e+07	0			0.4	312.764	737.917	2.03239e+08	51.7718	2.5		0	2023-07-08	0.603807		1	1.67201e-05	2.63075e-05	0	0	0.6	1	0.396193	0.97144	454600	0.0243025	2.5	0.984771	1.00002	0.990482	0.000261545	0.000185207	0.000260491	00:00:00	508198	00:00:00			3.36596e+08	2023-07-08
2023-07-09	1.69367e+07	0			0.4	311.91	735.885	2.0324e+08	51.6312	2.5		0	2023-07-09	0.603799		1	1.66634e-05	2.62346e-05	0	0	0.6	1	0.396201	0.97144	454900	0.0243025	2.5	0.984771	1.00002	0.990502	0.000261545	0.000185207	0.000260491	00:00:00	508199	00:00:00			3.36602e+08	2023-07-09
2023-07-10	1.69367e+07	0			0.4	311.06	733.863	2.03241e+08	51.4913	2.5		0	2023-07-10	0.603791		1	1.66071e-05	2.61621e-05	0	0	0.6	1	0.396209	0.97144	455200	0.0243025	2.5	0.984771	1.00002	0.990522	0.000261545	0.000185207	0.000260491	00:00:00	508200	00:00:00			3.36607e+08	2023-07-10
2023-07-11	1.69368e+07	0			0.4	310.215	731.851	2.03241e+08	51.352	2.5		0	2023-07-11	0.603783		1	1.6551e-05	2.60899e-05	0	0	0.6	1	0.396217	0.97144	455500	0.0243025	2.5	0.984771	1.00002	0.990543	0.000261545	0.000185207	0.000260491	00:00:00	508202	00:00:00			3.36613e+08	2023-07-11
2023-07-12	1.69368e+07	0			0.4	309.373	729.848	2.03242e+08	51.2135	2.5		0	2023-07-12	0.603775		1	1.64953e-05	2.60181e-05	0	0	0.6	1	0.396225	0.97144	455800	0.0243025	2.5	0.984771	1.00002	0.990563	0.000261545	0.000185207	0.000260491	00:00:00	508203	00:00:00			3.36618e+08	2023-07-12
2023-07-13	1.69369e+07	0			0.4	308.535	727.855	2.03242e+08	51.0756	2.5		0	2023-07-13	0.603767		1	1.64398e-05	2.59466e-05	0	0	0.6	1	0.396233	0.97144	456100	0.0243025	2.5	0.984771	1.00002	0.990583	0.000261545	0.000185207	0.000260491	00:00:00	508204	00:00:00			3.36624e+08	2023-07-13
2023-07-14	1.69369e+07	0			0.4	307.702	725.872	2.03243e+08	50.9383	2.5		0	2023-07-14	0.603759		1	1.63846e-05	2.58755e-05	0	0	0.6	1	0.396241	0.97144	456400	0.0243025	2.5	0.984771	1.00002	0.990603	0.000261545	0.000185207	0.000260491	00:00:00	508206	00:00:00			3.36629e+08	2023-07-14
2023-07-15	1.6937e+07	0			0.4	306.872	723.898	2.03244e+08	50.8018	2.5		0	2023-07-15	0.60375		1	1.63297e-05	2.58047e-05	0	0	0.6	1	0.39625	0.97144	456700	0.0243025	2.5	0.984771	1.00002	0.990624	0.000261545	0.000185207	0.000260491	00:00:00	508207	00:00:00			3.36635e+08	2023-07-15
2023-07-16	1.6937e+07	0			0.4	306.047	721.934	2.03244e+08	50.6659	2.5		0	2023-07-16	0.603742		1	1.62751e-05	2.57343e-05	0	0	0.6	1	0.396258	0.97144	457000	0.0243025	2.5	0.984771	1.00002	0.990644	0.000261545	0.000185207	0.000260491	00:00:00	508208	00:00:00			3.36641e+08	2023-07-16
2023-07-17	1.69371e+07	0			0.4	305.226	719.979	2.03245e+08	50.5306	2.5		0	2023-07-17	0.603734		1	1.62207e-05	2.56642e-05	0	0	0.6	1	0.396266	0.97144	457300	0.0243025	2.5	0.984771	1.00002	0.990664	0.000261545	0.000185207	0.000260491	00:00:00	508209	00:00:00			3.36646e+08	2023-07-17
2023-07-18	1.69371e+07	0			0.4	304.408	718.034	2.03245e+08	50.396	2.5		0	2023-07-18	0.603726		1	1.61667e-05	2.55944e-05	0	0	0.6	1	0.396274	0.97144	457600	0.0243025	2.5	0.984771	1.00002	0.990685	0.000261545	0.000185207	0.000260491	00:00:00	508211	00:00:00			3.36652e+08	2023-07-18
2023-07-19	1.69372e+07	0			0.4	303.595	716.098	2.03246e+08	50.2621	2.5		0	2023-07-19	0.603718		1	1.61129e-05	2.5525e-05	0	0	0.6	1	0.396282	0.97144	457900	0.0243025	2.5	0.984771	1.00002	0.990705	0.000261545	0.000185207	0.000260491	00:00:00	508212	00:00:00			3.36657e+08	2023-07-19
2023-07-20	1.69372e+07	0			0.4	302.785	714.172	2.03247e+08	50.1288	2.5		0	2023-07-20	0.60371		1	1.60594e-05	2.54559e-05	0	0	0.6	1	0.39629	0.97144	458200	0.0243025	2.5	0.984771	1.00002	0.990725	0.000261545	0.000185207	0.000260491	00:00:00	508213	00:00:00			3.36663e+08	2023-07-20
2023-07-21	1.69373e+07	0			0.4	301.98	712.255	2.03247e+08	49.9962	2.5		0	2023-07-21	0.603702		1	1.60062e-05	2.53872e-05	0	0	0.6	1	0.396298	0.97144	458500	0.0243025	2.5	0.984771	1.00002	0.990746	0.000261545	0.000185207	0.000260491	00:00:00	508215	00:00:00			3.36668e+08	2023-07-21
2023-07-22	1.69373e+07	0			0.4	301.178	710.347	2.03248e+08	49.8642	2.5		0	2023-07-22	0.603694		1	1.59533e-05	2.53188e-05	0	0	0.6	1	0.396306	0.97144	458800	0.0243025	2.5	0.984771	1.00002	0.990766	0.000261545	0.000185207	0.000260491	00:00:00	508216	00:00:00			3.36674e+08	2023-07-22
2023-07-23	1.69374e+07	0			0.4	300.38	708.449	2.03248e+08	49.7328	2.5		0	2023-07-23	0.603685		1	1.59006e-05	2.52507e-05	0	0	0.6	1	0.396315	0.97144	459100	0.0243025	2.5	0.984771	1.00002	0.990786	0.000261545	0.000185207	0.000260491	00:00:00	508217	00:00:00			3.36679e+08	2023-07-23
2023-07-24	1.69374e+07	0			0.4	299.586	706.56	2.03249e+08	49.6021	2.5		0	2023-07-24	0.603677		1	1.58483e-05	2.51829e-05	0	0	0.6	1	0.396323	0.97144	459400	0.0243025	2.5	0.984771	1.00002	0.990807	0.000261545	0.000185207	0.000260491	00:00:00	508218	00:00:00			3.36685e+08	2023-07-24
2023-07-25	1.69375e+07	0			0.4	298.796	704.68	2.0325e+08	49.472	2.5		0	2023-07-25	0.603669		1	1.57961e-05	2.51155e-05	0	0	0.6	1	0.396331	0.97144	459700	0.0243025	2.5	0.984771	1.00002	0.990827	0.000261545	0.000185207	0.000260491	00:00:00	508220	00:00:00			3.3669e+08	2023-07-25
2023-07-26	1.69375e+07	0			0.4	298.01	702.809	2.0325e+08	49.3425	2.5		0	2023-07-26	0.603661		1	1.57443e-05	2.50484e-05	0	0	0.6	1	0.396339	0.97144	460000	0.0243025	2.5	0.984771	1.00002	0.990848	0.000261545	0.000185207	0.000260491	00:00:00	508221	00:00:00			3.36696e+08	2023-07-26
2023-07-27	1.69376e+07	0			0.4	297.227	700.947	2.03251e+08	49.2137	2.5		0	2023-07-27	0.603653		1	1.56927e-05	2.49817e-05	0	0	0.6	1	0.396347	0.97144	460300	0.0243025	2.5	0.984771	1.00002	0.990868	0.000261545	0.000185207	0.000260491	00:00:00	508222	00:00:00			3.36701e+08	2023-07-27
2023-07-28	1.69376e+07	0			0.4	296.449	699.094	2.03251e+08	49.0855	2.5		0	2023-07-28	0.603645		1	1.56414e-05	2.49152e-05	0	0	0.6	1	0.396355	0.97144	460600	0.0243025	2.5	0.984771	1.00002	0.990889	0.000261545	0.000185207	0.000260491	00:00:00	508223	00:00:00			3.36707e+08	2023-07-28
2023-07-29	1.69377e+07	0			0.4	295.674	697.25	2.03252e+08	48.9579	2.5		0	2023-07-29	0.603636		1	1.55904e-05	2.48491e-05	0	0	0.6	1	0.396364	0.97144	460900	0.0243025	2.5	0.984771	1.00002	0.990909	0.000261545	0.000185207	0.000260491	00:00:00	508225	00:00:00			3.36713e+08	2023-07-29
2023-07-30	1.69377e+07	0			0.4	294.903	695.415	2.03253e+08	48.8309	2.5		0	2023-07-30	0.603628		1	1.55396e-05	2.47833e-05	0	0	0.6	1	0.396372	0.97144	461200	0.0243025	2.5	0.984771	1.00002	0.990929	0.000261545	0.000185207	0.000260491	00:00:00	508226	00:00:00			3.36718e+08	2023-07-30
2023-07-31	1.69378e+07	0			0.4	294.135	693.589	2.03253e+08	48.7046	2.5		0	2023-07-31	0.60362		1	1.54891e-05	2.47178e-05	0	0	0.6	1	0.39638	0.97144	461500	0.0243025	2.5	0.984771	1.00002	0.99095	0.000261545	0.000185207	0.000260491	00:00:00	508227	00:00:00			3.36724e+08	2023-07-31
2023-08-01	1.69378e+07	0			0.4	293.372	691.772	2.03254e+08	48.5789	2.5		0	2023-08-01	0.603612		1	1.54389e-05	2.46526e-05	0	0	0.6	1	0.396388	0.97144	461800	0.0243025	2.5	0.984771	1.00002	0.99097	0.000261545	0.000185207	0.000260491	00:00:00	508228	00:00:00			3.36729e+08	2023-08-01
2023-08-02	1.69379e+07	0			0.4	292.612	689.964	2.03254e+08	48.4537	2.5		0	2023-08-02	0.603604		1	1.53889e-05	2.45878e-05	0	0	0.6	1	0.396396	0.97144	462100	0.0243025	2.5	0.984771	1.00002	0.990991	0.000261545	0.000185207	0.000260491	00:00:00	508230	00:00:00			3.36735e+08	2023-08-02
2023-08-03	1.69379e+07	0			0.4	291.855	688.164	2.03255e+08	48.3292	2.5		0	2023-08-03	0.603595		1	1.53391e-05	2.45233e-05	0	0	0.6	1	0.396405	0.97144	462400	0.0243025	2.5	0.984771	1.00002	0.991011	0.000261545	0.000185207	0.000260491	00:00:00	508231	00:00:00			3.3674e+08	2023-08-03
2023-08-04	1.6938e+07	0			0.4	291.103	686.373	2.03255e+08	48.2053	2.5		0	2023-08-04	0.603587		1	1.52897e-05	2.4459e-05	0	0	0.6	1	0.396413	0.97144	462700	0.0243025	2.5	0.984771	1.00002	0.991032	0.000261545	0.000185207	0.000260491	00:00:00	508232	00:00:00			3.36746e+08	2023-08-04
2023-08-05	1.6938e+07	0			0.4	290.354	684.591	2.03256e+08	48.082	2.5		0	2023-08-05	0.603579		1	1.52404e-05	2.43951e-05	0	0	0.6	1	0.396421	0.97144	463000	0.0243025	2.5	0.984771	1.00002	0.991052	0.000261545	0.000185207	0.000260491	00:00:00	508233	00:00:00			3.36751e+08	2023-08-05
2023-08-06	1.6938e+07	0			0.4	289.608	682.818	2.03257e+08	47.9593	2.5		0	2023-08-06	0.603571		1	1.51915e-05	2.43315e-05	0	0	0.6	1	0.396429	0.97144	463300	0.0243025	2.5	0.984771	1.00002	0.991073	0.000261545	0.000185207	0.000260491	00:00:00	508235	00:00:00			3.36757e+08	2023-08-06
2023-08-07	1.69381e+07	0			0.4	288.867	681.053	2.03257e+08	47.8372	2.5		0	2023-08-07	0.603563		1	1.51428e-05	2.42683e-05	0	0	0.6	1	0.396437	0.97144	463600	0.0243025	2.5	0.984771	1.00002	0.991093	0.000261545	0.000185207	0.000260491	00:00:00	508236	00:00:00			3.36762e+08	2023-08-07
2023-08-08	1.69381e+07	0			0.4	288.129	679.297	2.03258e+08	47.7157	2.5		0	2023-08-08	0.603554		1	1.50943e-05	2.42053e-05	0	0	0.6	1	0.396446	0.97144	463900	0.0243025	2.5	0.984771	1.00002	0.991114	0.000261545	0.000185207	0.000260491	00:00:00	508237	00:00:00			3.36768e+08	2023-08-08
2023-08-09	1.69382e+07	0			0.4	287.394	677.549	2.03258e+08	47.5947	2.5		0	2023-08-09	0.603546		1	1.50461e-05	2.41426e-05	0	0	0.6	1	0.396454	0.97144	464200	0.0243025	2.5	0.984771	1.00002	0.991135	0.000261545	0.000185207	0.000260491	00:00:00	508238	00:00:00			3.36773e+08	2023-08-09
2023-08-10	1.69382e+07	0			0.4	286.663	675.809	2.03259e+08	47.4744	2.5		0	2023-08-10	0.603538		1	1.49981e-05	2.40802e-05	0	0	0.6	1	0.396462	0.97144	464500	0.0243025	2.5	0.984771	1.00002	0.991155	0.000261545	0.000185207	0.000260491	00:00:00	508239	00:00:00			3.36779e+08	2023-08-10
2023-08-11	1.69383e+07	0			0.4	285.936	674.079	2.03259e+08	47.3546	2.5		0	2023-08-11	0.60353		1	1.49504e-05	2.40182e-05	0	0	0.6	1	0.39647	0.97144	464800	0.0243025	2.5	0.984771	1.00002	0.991176	0.000261545	0.000185207	0.000260491	00:00:00	508241	00:00:00			3.36784e+08	2023-08-11
2023-08-12	1.69383e+07	0			0.4	285.212	672.356	2.0326e+08	47.2355	2.5		0	2023-08-12	0.603521		1	1.4903e-05	2.39564e-05	0	0	0.6	1	0.396479	0.97144	465100	0.0243025	2.5	0.984771	1.00002	0.991196	0.000261545	0.000185207	0.000260491	00:00:00	508242	00:00:00			3.3679e+08	2023-08-12
2023-08-13	1.69384e+07	0			0.4	284.492	670.642	2.03261e+08	47.1169	2.5		0	2023-08-13	0.603513		1	1.48557e-05	2.38949e-05	0	0	0.6	1	0.396487	0.97144	465400	0.0243025	2.5	0.984771	1.00002	0.991217	0.000261545	0.000185207	0.000260491	00:00:00	508243	00:00:00			3.36796e+08	2023-08-13
2023-08-14	1.69384e+07	0			0.4	283.775	668.936	2.03261e+08	46.9988	2.5		0	2023-08-14	0.603505		1	1.48088e-05	2.38338e-05	0	0	0.6	1	0.396495	0.97144	465700	0.0243025	2.5	0.984771	1.00002	0.991238	0.000261545	0.000185207	0.000260491	00:00:00	508244	00:00:00			3.36801e+08	2023-08-14
2023-08-15	1.69385e+07	0			0.4	283.062	667.239	2.03262e+08	46.8814	2.5		0	2023-08-15	0.603497		1	1.4762e-05	2.37729e-05	0	0	0.6	1	0.396503	0.97144	466000	0.0243025	2.5	0.984771	1.00002	0.991258	0.000261545	0.000185207	0.000260491	00:00:00	508245	00:00:00			3.36807e+08	2023-08-15
2023-08-16	1.69385e+07	0			0.4	282.352	665.55	2.03262e+08	46.7645	2.5		0	2023-08-16	0.603488		1	1.47155e-05	2.37123e-05	0	0	0.6	1	0.396512	0.97144	466300	0.0243025	2.5	0.984771	1.00002	0.991279	0.000261545	0.000185207	0.000260491	00:00:00	508247	00:00:00			3.36812e+08	2023-08-16
2023-08-17	1.69386e+07	0			0.4	281.645	663.869	2.03263e+08	46.6482	2.5		0	2023-08-17	0.60348		1	1.46693e-05	2.3652e-05	0	0	0.6	1	0.39652	0.97144	466600	0.0243025	2.5	0.984771	1.00002	0.991299	0.000261545	0.000185207	0.000260491	00:00:00	508248	00:00:00			3.36818e+08	2023-08-17
2023-08-18	1.69386e+07	0			0.4	280.942	662.196	2.03263e+08	46.5325	2.5		0	2023-08-18	0.603472		1	1.46233e-05	2.3592e-05	0	0	0.6	1	0.396528	0.97144	466900	0.0243025	2.5	0.984771	1.00002	0.99132	0.000261545	0.000185207	0.000260491	00:00:00	508249	00:00:00			3.36823e+08	2023-08-18
2023-08-19	1.69387e+07	0			0.4	280.243	660.531	2.03264e+08	46.4173	2.5		0	2023-08-19	0.603464		1	1.45775e-05	2.35323e-05	0	0	0.6	1	0.396536	0.97144	467200	0.0243025	2.5	0.984771	1.00002	0.991341	0.000261545	0.000185207	0.000260491	00:00:00	508250	00:00:00			3.36829e+08	2023-08-19
2023-08-20	1.69387e+07	0			0.4	279.547	658.874	2.03264e+08	46.3027	2.5		0	2023-08-20	0.603455		1	1.45319e-05	2.34729e-05	0	0	0.6	1	0.396545	0.97144	467500	0.0243025	2.5	0.984771	1.00002	0.991361	0.000261545	0.000185207	0.000260491	00:00:00	508251	00:00:00			3.36834e+08	2023-08-20
2023-08-21	1.69388e+07	0			0.4	278.854	657.226	2.03265e+08	46.1886	2.5		0	2023-08-21	0.603447		1	1.44866e-05	2.34138e-05	0	0	0.6	1	0.396553	0.97144	467800	0.0243025	2.5	0.984771	1.00002	0.991382	0.000261545	0.000185207	0.000260491	00:00:00	508253	00:00:00			3.3684e+08	2023-08-21
2023-08-22	1.69388e+07	0			0.4	278.164	655.585	2.03266e+08	46.0751	2.5		0	2023-08-22	0.603439		1	1.44415e-05	2.3355e-05	0	0	0.6	1	0.396561	0.97144	468100	0.0243025	2.5	0.984771	1.00002	0.991403	0.000261545	0.000185207	0.000260491	00:00:00	508254	00:00:00			3.36845e+08	2023-08-22
2023-08-23	1.69388e+07	0			0.4	277.478	653.953	2.03266e+08	45.9622	2.5		0	2023-08-23	0.603431		1	1.43967e-05	2.32965e-05	0	0	0.6	1	0.396569	0.97144	468400	0.0243025	2.5	0.984771	1.00002	0.991424	0.000261545	0.000185207	0.000260491	00:00:00	508255	00:00:00			3.36851e+08	2023-08-23
2023-08-24	1.69389e+07	0			0.4	276.796	652.328	2.03267e+08	45.8498	2.5		0	2023-08-24	0.603422		1	1.43521e-05	2.32382e-05	0	0	0.6	1	0.396578	0.97144	468700	0.0243025	2.5	0.984771	1.00002	0.991444	0.000261545	0.000185207	0.000260491	00:00:00	508256	00:00:00			3.36856e+08	2023-08-24
2023-08-25	1.69389e+07	0			0.4	276.116	650.711	2.03267e+08	45.7379	2.5		0	2023-08-25	0.603414		1	1.43077e-05	2.31802e-05	0	0	0.6	1	0.396586	0.97144	469000	0.0243025	2.5	0.984771	1.00002	0.991465	0.000261545	0.000185207	0.000260491	00:00:00	508257	00:00:00			3.36862e+08	2023-08-25
2023-08-26	1.6939e+07	0			0.4	275.44	649.102	2.03268e+08	45.6266	2.5		0	2023-08-26	0.603406		1	1.42635e-05	2.31225e-05	0	0	0.6	1	0.396594	0.97144	469300	0.0243025	2.5	0.984771	1.00002	0.991486	0.000261545	0.000185207	0.000260491	00:00:00	508258	00:00:00			3.36868e+08	2023-08-26
2023-08-27	1.6939e+07	0			0.4	274.767	647.501	2.03268e+08	45.5158	2.5		0	2023-08-27	0.603397		1	1.42196e-05	2.30651e-05	0	0	0.6	1	0.396603	0.97144	469600	0.0243025	2.5	0.984771	1.00002	0.991506	0.000261545	0.000185207	0.000260491	00:00:00	508260	00:00:00			3.36873e+08	2023-08-27
2023-08-28	1.69391e+07	0			0.4	274.098	645.908	2.03269e+08	45.4056	2.5		0	2023-08-28	0.603389		1	1.41759e-05	2.3008e-05	0	0	0.6	1	0.396611	0.97144	469900	0.0243025	2.5	0.984771	1.00002	0.991527	0.000261545	0.000185207	0.000260491	00:00:00	508261	00:00:00			3.36879e+08	2023-08-28
2023-08-29	1.69391e+07	0			0.4	273.432	644.323	2.03269e+08	45.2959	2.5		0	2023-08-29	0.603381		1	1.41324e-05	2.29511e-05	0	0	0.6	1	0.396619	0.97144	470200	0.0243025	2.5	0.984771	1.00002	0.991548	0.000261545	0.000185207	0.000260491	00:00:00	508262	00:00:00			3.36884e+08	2023-08-29
2023-08-30	1.69392e+07	0			0.4	272.769	642.745	2.0327e+08	45.1867	2.5		0	2023-08-30	0.603373		1	1.40892e-05	2.28946e-05	0	0	0.6	1	0.396627	0.97144	470500	0.0243025	2.5	0.984771	1.00002	0.991569	0.000261545	0.000185207	0.000260491	00:00:00	508263	00:00:00			3.3689e+08	2023-08-30
2023-08-31	1.69392e+07	0			0.4	272.109	641.175	2.03271e+08	45.0781	2.5		0	2023-08-31	0.603364		1	1.40461e-05	2.28382e-05	0	0	0.6	1	0.396636	0.97144	470800	0.0243025	2.5	0.984771	1.00002	0.99159	0.000261545	0.000185207	0.000260491	00:00:00	508264	00:00:00			3.36895e+08	2023-08-31
2023-09-01	1.69393e+07	0			0.4	271.452	639.612	2.03271e+08	44.97	2.5		0	2023-09-01	0.603356		1	1.40033e-05	2.27822e-05	0	0	0.6	1	0.396644	0.97144	471100	0.0243025	2.5	0.984771	1.00002	0.99161	0.000261545	0.000185207	0.000260491	00:00:00	508265	00:00:00			3.36901e+08	2023-09-01
2023-09-02	1.69393e+07	0			0.4	270.799	638.057	2.03272e+08	44.8625	2.5		0	2023-09-02	0.603348		1	1.39607e-05	2.27265e-05	0	0	0.6	1	0.396652	0.97144	471400	0.0243025	2.5	0.984771	1.00002	0.991631	0.000261545	0.000185207	0.000260491	00:00:00	508266	00:00:00			3.36906e+08	2023-09-02
2023-09-03	1.69393e+07	0			0.4	270.149	636.51	2.03272e+08	44.7554	2.5		0	2023-09-03	0.603339		1	1.39184e-05	2.2671e-05	0	0	0.6	1	0.396661	0.97144	471700	0.0243025	2.5	0.984771	1.00002	0.991652	0.000261545	0.000185207	0.000260491	00:00:00	508268	00:00:00			3.36912e+08	2023-09-03
2023-09-04	1.69394e+07	0			0.4	269.502	634.971	2.03273e+08	44.6489	2.5		0	2023-09-04	0.603331		1	1.38762e-05	2.26158e-05	0	0	0.6	1	0.396669	0.97144	472000	0.0243025	2.5	0.984771	1.00002	0.991673	0.000261545	0.000185207	0.000260491	00:00:00	508269	00:00:00			3.36917e+08	2023-09-04
2023-09-05	1.69394e+07	0			0.4	268.858	633.438	2.03273e+08	44.5429	2.5		0	2023-09-05	0.603323		1	1.38343e-05	2.25608e-05	0	0	0.6	1	0.396677	0.97144	472300	0.0243025	2.5	0.984771	1.00002	0.991694	0.000261545	0.000185207	0.000260491	00:00:00	508270	00:00:00			3.36923e+08	2023-09-05
2023-09-06	1.69395e+07	0			0.4	268.217	631.914	2.03274e+08	44.4374	2.5		0	2023-09-06	0.603314		1	1.37925e-05	2.25062e-05	0	0	0.6	1	0.396686	0.97144	472600	0.0243025	2.5	0.984771	1.00002	0.991714	0.000261545	0.000185207	0.000260491	00:00:00	508271	00:00:00			3.36928e+08	2023-09-06
2023-09-07	1.69395e+07	0			0.4	267.58	630.396	2.03274e+08	44.3325	2.5		0	2023-09-07	0.603306		1	1.3751e-05	2.24517e-05	0	0	0.6	1	0.396694	0.97144	472900	0.0243025	2.5	0.984771	1.00002	0.991735	0.000261545	0.000185207	0.000260491	00:00:00	508272	00:00:00			3.36934e+08	2023-09-07
2023-09-08	1.69396e+07	0			0.4	266.945	628.887	2.03275e+08	44.228	2.5		0	2023-09-08	0.603298		1	1.37097e-05	2.23976e-05	0	0	0.6	1	0.396702	0.97144	473200	0.0243025	2.5	0.984771	1.00002	0.991756	0.000261545	0.000185207	0.000260491	00:00:00	508273	00:00:00			3.3694e+08	2023-09-08
2023-09-09	1.69396e+07	0			0.4	266.314	627.384	2.03275e+08	44.1241	2.5		0	2023-09-09	0.603289		1	1.36686e-05	2.23437e-05	0	0	0.6	1	0.396711	0.97144	473500	0.0243025	2.5	0.984771	1.00002	0.991777	0.000261545	0.000185207	0.000260491	00:00:00	508274	00:00:00			3.36945e+08	2023-09-09
2023-09-10	1.69397e+07	0			0.4	265.686	625.889	2.03276e+08	44.0207	2.5		0	2023-09-10	0.603281		1	1.36277e-05	2.22901e-05	0	0	0.6	1	0.396719	0.97144	473800	0.0243025	2.5	0.984771	1.00002	0.991798	0.000261545	0.000185207	0.000260491	00:00:00	508276	00:00:00			3.36951e+08	2023-09-10
2023-09-11	1.69397e+07	0			0.4	265.06	624.401	2.03276e+08	43.9177	2.5		0	2023-09-11	0.603273		1	1.35871e-05	2.22368e-05	0	0	0.6	1	0.396727	0.97144	474100	0.0243025	2.5	0.984771	1.00002	0.991819	0.000261545	0.000185207	0.000260491	00:00:00	508277	00:00:00			3.36956e+08	2023-09-11
2023-09-12	1.69397e+07	0			0.4	264.438	622.92	2.03277e+08	43.8153	2.5		0	2023-09-12	0.603264		1	1.35466e-05	2.21837e-05	0	0	0.6	1	0.396736	0.97144	474400	0.0243025	2.5	0.984771	1.00002	0.99184	0.000261545	0.000185207	0.000260491	00:00:00	508278	00:00:00			3.36962e+08	2023-09-12
2023-09-13	1.69398e+07	0			0.4	263.819	621.447	2.03277e+08	43.7134	2.5		0	2023-09-13	0.603256		1	1.35064e-05	2.21308e-05	0	0	0.6	1	0.396744	0.97144	474700	0.0243025	2.5	0.984771	1.00002	0.991861	0.000261545	0.000185207	0.000260491	00:00:00	508279	00:00:00			3.36967e+08	2023-09-13
2023-09-14	1.69398e+07	0			0.4	263.203	619.981	2.03278e+08	43.612	2.5		0	2023-09-14	0.603247		1	1.34663e-05	2.20783e-05	0	0	0.6	1	0.396753	0.97144	475000	0.0243025	2.5	0.984771	1.00002	0.991881	0.000261545	0.000185207	0.000260491	00:00:00	508280	00:00:00			3.36973e+08	2023-09-14
2023-09-15	1.69399e+07	0			0.4	262.59	618.522	2.03278e+08	43.5111	2.5		0	2023-09-15	0.603239		1	1.34265e-05	2.20259e-05	0	0	0.6	1	0.396761	0.97144	475300	0.0243025	2.5	0.984771	1.00002	0.991902	0.000261545	0.000185207	0.000260491	00:00:00	508281	00:00:00			3.36978e+08	2023-09-15
2023-09-16	1.69399e+07	0			0.4	261.98	617.07	2.03279e+08	43.4106	2.5		0	2023-09-16	0.603231		1	1.33868e-05	2.19739e-05	0	0	0.6	1	0.396769	0.97144	475600	0.0243025	2.5	0.984771	1.00002	0.991923	0.000261545	0.000185207	0.000260491	00:00:00	508282	00:00:00			3.36984e+08	2023-09-16
2023-09-17	1.694e+07	0			0.4	261.373	615.625	2.0328e+08	43.3107	2.5		0	2023-09-17	0.603222		1	1.33474e-05	2.19221e-05	0	0	0.6	1	0.396778	0.97144	475900	0.0243025	2.5	0.984771	1.00002	0.991944	0.000261545	0.000185207	0.000260491	00:00:00	508283	00:00:00			3.36989e+08	2023-09-17
2023-09-18	1.694e+07	0			0.4	260.769	614.188	2.0328e+08	43.2113	2.5		0	2023-09-18	0.603214		1	1.33081e-05	2.18705e-05	0	0	0.6	1	0.396786	0.97144	476200	0.0243025	2.5	0.984771	1.00002	0.991965	0.000261545	0.000185207	0.000260491	00:00:00	508284	00:00:00			3.36995e+08	2023-09-18
2023-09-19	1.694e+07	0			0.4	260.168	612.757	2.03281e+08	43.1123	2.5		0	2023-09-19	0.603206		1	1.32691e-05	2.18192e-05	0	0	0.6	1	0.396794	0.97144	476500	0.0243025	2.5	0.984771	1.00002	0.991986	0.000261545	0.000185207	0.000260491	00:00:00	508286	00:00:00			3.37e+08	2023-09-19
2023-09-20	1.69401e+07	0			0.4	259.57	611.333	2.03281e+08	43.0138	2.5		0	2023-09-20	0.603197		1	1.32303e-05	2.17682e-05	0	0	0.6	1	0.396803	0.97144	476800	0.0243025	2.5	0.984771	1.00002	0.992007	0.000261545	0.000185207	0.000260491	00:00:00	508287	00:00:00			3.37006e+08	2023-09-20
2023-09-21	1.69401e+07	0			0.4	258.975	609.917	2.03282e+08	42.9158	2.5		0	2023-09-21	0.603189		1	1.31916e-05	2.17174e-05	0	0	0.6	1	0.396811	0.97144	477100	0.0243025	2.5	0.984771	1.00002	0.992028	0.000261545	0.000185207	0.000260491	00:00:00	508288	00:00:00			3.37012e+08	2023-09-21
2023-09-22	1.69402e+07	0			0.4	258.382	608.507	2.03282e+08	42.8183	2.5		0	2023-09-22	0.60318		1	1.31532e-05	2.16668e-05	0	0	0.6	1	0.39682	0.97144	477400	0.0243025	2.5	0.984771	1.00002	0.992049	0.000261545	0.000185207	0.000260491	00:00:00	508289	00:00:00			3.37017e+08	2023-09-22
2023-09-23	1.69402e+07	0			0.4	257.793	607.104	2.03283e+08	42.7213	2.5		0	2023-09-23	0.603172		1	1.31149e-05	2.16165e-05	0	0	0.6	1	0.396828	0.97144	477700	0.0243025	2.5	0.984771	1.00002	0.99207	0.000261545	0.000185207	0.000260491	00:00:00	508290	00:00:00			3.37023e+08	2023-09-23
2023-09-24	1.69403e+07	0			0.4	257.206	605.708	2.03283e+08	42.6248	2.5		0	2023-09-24	0.603164		1	1.30769e-05	2.15665e-05	0	0	0.6	1	0.396836	0.97144	478000	0.0243025	2.5	0.984771	1.00002	0.992091	0.000261545	0.000185207	0.000260491	00:00:00	508291	00:00:00			3.37028e+08	2023-09-24
2023-09-25	1.69403e+07	0			0.4	256.623	604.319	2.03284e+08	42.5287	2.5		0	2023-09-25	0.603155		1	1.3039e-05	2.15166e-05	0	0	0.6	1	0.396845	0.97144	478300	0.0243025	2.5	0.984771	1.00002	0.992112	0.000261545	0.000185207	0.000260491	00:00:00	508292	00:00:00			3.37034e+08	2023-09-25
2023-09-26	1.69403e+07	0			0.4	256.042	602.937	2.03284e+08	42.4331	2.5		0	2023-09-26	0.603147		1	1.30014e-05	2.14671e-05	0	0	0.6	1	0.396853	0.97144	478600	0.0243025	2.5	0.984771	1.00002	0.992133	0.000261545	0.000185207	0.000260491	00:00:00	508293	00:00:00			3.37039e+08	2023-09-26
2023-09-27	1.69404e+07	0			0.4	255.464	601.562	2.03285e+08	42.338	2.5		0	2023-09-27	0.603138		1	1.29639e-05	2.14177e-05	0	0	0.6	1	0.396862	0.97144	478900	0.0243025	2.5	0.984771	1.00002	0.992154	0.000261545	0.000185207	0.000260491	00:00:00	508294	00:00:00			3.37045e+08	2023-09-27
2023-09-28	1.69404e+07	0			0.4	254.889	600.193	2.03285e+08	42.2433	2.5		0	2023-09-28	0.60313		1	1.29266e-05	2.13687e-05	0	0	0.6	1	0.39687	0.97144	479200	0.0243025	2.5	0.984771	1.00002	0.992175	0.000261545	0.000185207	0.000260491	00:00:00	508295	00:00:00			3.3705e+08	2023-09-28
2023-09-29	1.69405e+07	0			0.4	254.317	598.831	2.03286e+08	42.1491	2.5		0	2023-09-29	0.603122		1	1.28895e-05	2.13198e-05	0	0	0.6	1	0.396878	0.97144	479500	0.0243025	2.5	0.984771	1.00002	0.992196	0.000261545	0.000185207	0.000260491	00:00:00	508296	00:00:00			3.37056e+08	2023-09-29
2023-09-30	1.69405e+07	0			0.4	253.747	597.476	2.03286e+08	42.0554	2.5		0	2023-09-30	0.603113		1	1.28526e-05	2.12712e-05	0	0	0.6	1	0.396887	0.97144	479800	0.0243025	2.5	0.984771	1.00002	0.992217	0.000261545	0.000185207	0.000260491	00:00:00	508297	00:00:00			3.37061e+08	2023-09-30
2023-10-01	1.69406e+07	0			0.4	253.181	596.127	2.03287e+08	41.9621	2.5		0	2023-10-01	0.603105		1	1.28159e-05	2.12229e-05	0	0	0.6	1	0.396895	0.97144	480100	0.0243025	2.5	0.984771	1.00002	0.992238	0.000261545	0.000185207	0.000260491	00:00:00	508299	00:00:00			3.37067e+08	2023-10-01
2023-10-02	1.69406e+07	0			0.4	252.617	594.785	2.03287e+08	41.8693	2.5		0	2023-10-02	0.603096		1	1.27794e-05	2.11747e-05	0	0	0.6	1	0.396904	0.97144	480400	0.0243025	2.5	0.984771	1.00002	0.992259	0.000261545	0.000185207	0.000260491	00:00:00	508300	00:00:00			3.37072e+08	2023-10-02
2023-10-03	1.69406e+07	0			0.4	252.056	593.45	2.03288e+08	41.7769	2.5		0	2023-10-03	0.603088		1	1.27431e-05	2.11269e-05	0	0	0.6	1	0.396912	0.97144	480700	0.0243025	2.5	0.984771	1.00002	0.99228	0.000261545	0.000185207	0.000260491	00:00:00	508301	00:00:00			3.37078e+08	2023-10-03
2023-10-04	1.69407e+07	0			0.4	251.498	592.121	2.03288e+08	41.685	2.5		0	2023-10-04	0.603079		1	1.27069e-05	2.10792e-05	0	0	0.6	1	0.396921	0.97144	481000	0.0243025	2.5	0.984771	1.00002	0.992301	0.000261545	0.000185207	0.000260491	00:00:00	508302	00:00:00			3.37084e+08	2023-10-04
2023-10-05	1.69407e+07	0			0.4	250.942	590.799	2.03289e+08	41.5936	2.5		0	2023-10-05	0.603071		1	1.26709e-05	2.10318e-05	0	0	0.6	1	0.396929	0.97144	481300	0.0243025	2.5	0.984771	1.00002	0.992322	0.000261545	0.000185207	0.000260491	00:00:00	508303	00:00:00			3.37089e+08	2023-10-05
2023-10-06	1.69408e+07	0			0.4	250.39	589.483	2.03289e+08	41.5026	2.5		0	2023-10-06	0.603063		1	1.26352e-05	2.09846e-05	0	0	0.6	1	0.396937	0.97144	481600	0.0243025	2.5	0.984771	1.00002	0.992344	0.000261545	0.000185207	0.000260491	00:00:00	508304	00:00:00			3.37095e+08	2023-10-06
2023-10-07	1.69408e+07	0			0.4	249.84	588.174	2.0329e+08	41.4121	2.5		0	2023-10-07	0.603054		1	1.25996e-05	2.09377e-05	0	0	0.6	1	0.396946	0.97144	481900	0.0243025	2.5	0.984771	1.00002	0.992365	0.000261545	0.000185207	0.000260491	00:00:00	508305	00:00:00			3.371e+08	2023-10-07
2023-10-08	1.69408e+07	0			0.4	249.292	586.871	2.0329e+08	41.322	2.5		0	2023-10-08	0.603046		1	1.25641e-05	2.08909e-05	0	0	0.6	1	0.396954	0.97144	482200	0.0243025	2.5	0.984771	1.00002	0.992386	0.000261545	0.000185207	0.000260491	00:00:00	508306	00:00:00			3.37106e+08	2023-10-08
2023-10-09	1.69409e+07	0			0.4	248.748	585.575	2.03291e+08	41.2324	2.5		0	2023-10-09	0.603037		1	1.25289e-05	2.08444e-05	0	0	0.6	1	0.396963	0.97144	482500	0.0243025	2.5	0.984771	1.00002	0.992407	0.000261545	0.000185207	0.000260491	00:00:00	508307	00:00:00			3.37111e+08	2023-10-09
2023-10-10	1.69409e+07	0			0.4	248.206	584.285	2.03291e+08	41.1432	2.5		0	2023-10-10	0.603029		1	1.24938e-05	2.07982e-05	0	0	0.6	1	0.396971	0.97144	482800	0.0243025	2.5	0.984771	1.00002	0.992428	0.000261545	0.000185207	0.000260491	00:00:00	508308	00:00:00			3.37117e+08	2023-10-10
2023-10-11	1.6941e+07	0			0.4	247.667	583.001	2.03292e+08	41.0544	2.5		0	2023-10-11	0.60302		1	1.24589e-05	2.07522e-05	0	0	0.6	1	0.39698	0.97144	483100	0.0243025	2.5	0.984771	1.00002	0.992449	0.000261545	0.000185207	0.000260491	00:00:00	508309	00:00:00			3.37122e+08	2023-10-11
2023-10-12	1.6941e+07	0			0.4	247.13	581.724	2.03292e+08	40.9661	2.5		0	2023-10-12	0.603012		1	1.24242e-05	2.07064e-05	0	0	0.6	1	0.396988	0.97144	483400	0.0243025	2.5	0.984771	1.00002	0.99247	0.000261545	0.000185207	0.000260491	00:00:00	508310	00:00:00			3.37128e+08	2023-10-12
2023-10-13	1.69411e+07	0			0.4	246.596	580.453	2.03293e+08	40.8782	2.5		0	2023-10-13	0.603003		1	1.23897e-05	2.06608e-05	0	0	0.6	1	0.396997	0.97144	483700	0.0243025	2.5	0.984771	1.00002	0.992491	0.000261545	0.000185207	0.000260491	00:00:00	508311	00:00:00			3.37133e+08	2023-10-13
2023-10-14	1.69411e+07	0			0.4	246.065	579.189	2.03293e+08	40.7908	2.5		0	2023-10-14	0.602995		1	1.23554e-05	2.06154e-05	0	0	0.6	1	0.397005	0.97144	484000	0.0243025	2.5	0.984771	1.00002	0.992513	0.000261545	0.000185207	0.000260491	00:00:00	508312	00:00:00			3.37139e+08	2023-10-14
2023-10-15	1.69411e+07	0			0.4	245.536	577.93	2.03294e+08	40.7038	2.5		0	2023-10-15	0.602987		1	1.23212e-05	2.05703e-05	0	0	0.6	1	0.397013	0.97144	484300	0.0243025	2.5	0.984771	1.00002	0.992534	0.000261545	0.000185207	0.000260491	00:00:00	508313	00:00:00			3.37145e+08	2023-10-15
2023-10-16	1.69412e+07	0			0.4	245.01	576.678	2.03294e+08	40.6172	2.5		0	2023-10-16	0.602978		1	1.22872e-05	2.05254e-05	0	0	0.6	1	0.397022	0.97144	484600	0.0243025	2.5	0.984771	1.00002	0.992555	0.000261545	0.000185207	0.000260491	00:00:00	508314	00:00:00			3.3715e+08	2023-10-16
2023-10-17	1.69412e+07	0			0.4	244.487	575.432	2.03295e+08	40.531	2.5		0	2023-10-17	0.60297		1	1.22533e-05	2.04807e-05	0	0	0.6	1	0.39703	0.97144	484900	0.0243025	2.5	0.984771	1.00002	0.992576	0.000261545	0.000185207	0.000260491	00:00:00	508315	00:00:00			3.37156e+08	2023-10-17
2023-10-18	1.69413e+07	0			0.4	243.966	574.193	2.03295e+08	40.4453	2.5		0	2023-10-18	0.602961		1	1.22197e-05	2.04363e-05	0	0	0.6	1	0.397039	0.97144	485200	0.0243025	2.5	0.984771	1.00002	0.992597	0.000261545	0.000185207	0.000260491	00:00:00	508316	00:00:00			3.37161e+08	2023-10-18
2023-10-19	1.69413e+07	0			0.4	243.448	572.959	2.03296e+08	40.36	2.5		0	2023-10-19	0.602953		1	1.21862e-05	2.0392e-05	0	0	0.6	1	0.397047	0.97144	485500	0.0243025	2.5	0.984771	1.00002	0.992618	0.000261545	0.000185207	0.000260491	00:00:00	508317	00:00:00			3.37167e+08	2023-10-19
2023-10-20	1.69413e+07	0			0.4	242.933	571.732	2.03296e+08	40.2752	2.5		0	2023-10-20	0.602944		1	1.21529e-05	2.0348e-05	0	0	0.6	1	0.397056	0.97144	485800	0.0243025	2.5	0.984771	1.00002	0.99264	0.000261545	0.000185207	0.000260491	00:00:00	508318	00:00:00			3.37172e+08	2023-10-20
2023-10-21	1.69414e+07	0			0.4	242.42	570.51	2.03297e+08	40.1907	2.5		0	2023-10-21	0.602936		1	1.21197e-05	2.03042e-05	0	0	0.6	1	0.397064	0.97144	486100	0.0243025	2.5	0.984771	1.00002	0.992661	0.000261545	0.000185207	0.000260491	00:00:00	508319	00:00:00			3.37178e+08	2023-10-21
2023-10-22	1.69414e+07	0			0.4	241.909	569.295	2.03297e+08	40.1067	2.5		0	2023-10-22	0.602927		1	1.20867e-05	2.02606e-05	0	0	0.6	1	0.397073	0.97144	486400	0.0243025	2.5	0.984771	1.00002	0.992682	0.000261545	0.000185207	0.000260491	00:00:00	508320	00:00:00			3.37183e+08	2023-10-22
2023-10-23	1.69415e+07	0			0.4	241.401	568.086	2.03297e+08	40.0231	2.5		0	2023-10-23	0.602919		1	1.20539e-05	2.02172e-05	0	0	0.6	1	0.397081	0.97144	486700	0.0243025	2.5	0.984771	1.00002	0.992703	0.000261545	0.000185207	0.000260491	00:00:00	508322	00:00:00			3.37189e+08	2023-10-23
2023-10-24	1.69415e+07	0			0.4	240.896	566.882	2.03298e+08	39.9399	2.5		0	2023-10-24	0.60291		1	1.20213e-05	2.01741e-05	0	0	0.6	1	0.39709	0.97144	487000	0.0243025	2.5	0.984771	1.00002	0.992724	0.000261545	0.000185207	0.000260491	00:00:00	508323	00:00:00			3.37194e+08	2023-10-24
2023-10-25	1.69415e+07	0			0.4	240.393	565.685	2.03298e+08	39.8572	2.5		0	2023-10-25	0.602902		1	1.19888e-05	2.01312e-05	0	0	0.6	1	0.397098	0.97144	487300	0.0243025	2.5	0.984771	1.00002	0.992746	0.000261545	0.000185207	0.000260491	00:00:00	508324	00:00:00			3.372e+08	2023-10-25
2023-10-26	1.69416e+07	0			0.4	239.893	564.494	2.03299e+08	39.7748	2.5		0	2023-10-26	0.602893		1	1.19565e-05	2.00884e-05	0	0	0.6	1	0.397107	0.97144	487600	0.0243025	2.5	0.984771	1.00002	0.992767	0.000261545	0.000185207	0.000260491	00:00:00	508325	00:00:00			3.37205e+08	2023-10-26
[truncated: 3,681 more rows]

## Sheet: US-daily
2020-05-01	2020-07-01	2021-09-01	2020-07-01	2020-08-15	2020-11-01	2021-04-01	scale all unlocks by	0-main region, 1-subregion, 2-without sub	Use Daily Partial Unlock->1	UNLOCK ALL->1	Initial & Unlocked R0	Total / Known case ratio	Mortality as % of vent cases enter at right	FINAL CASES	Econ Cost % 18-month lock down	Total Est. Deaths	Use proportional vent. alloc.	Initial Known Cases on Vent.	Spreading Window (Days)	Case Duration	Vents per capita	Vents avail for current region	Vents main region	Vents subregion (if not auto alloc)	Pre-Peak Vent. Util. Target	MWFSa or late Vent. Util. Target	TTSu Vent. Util. Target	Population	Population main region	Population subregion (e.g. NY St.)	Name of main region	Name of sub-region	Ventil mfg rate/day	Change per day in crit cases on vent (.01%=half in 1 yr.)	region mortality % of vent cases	sub-region mortality % of vent cases	region w/o sub-region mortality % vent cases	population growth rate		ENDEMIC CREATED 04/21/22
[truncated: 999 more rows]

[truncated: 7 more sheets: endemic plots, World-likely, World-daily, profiles, Analysis, US-exp, US-exp2]
